# Supplementary material for: 2L-piRNA: A Two-Layer Ensemble Classifier for Identifying Piwi-Interacting RNAs and Their Function
Source: PubMed Central journal article supplement — Mol Ther Nucleic Acids. 2017 Apr 13;7:267–77. doi: 10.1016/j.omtn.2017.04.008 (PMC5415553; doi:10.1016/j.omtn.2017.04.008), 2017-04-13
Supplement: mmc1.pdf [file mmc1.pdf]

**OMTN, Volume 7**

**Supplemental Information**

**2L-piRNA: A Two-Layer Ensemble Classifier  
for Identifying Piwi-Interacting RNAs  
and Their Function**

**Bin Liu, Fan Yang, and Kuo-Chen Chou**

**Supporting Information S1. The benchmark dataset  $S$  constructed for identifying piRNA sequences and their functions.** It is formed by three subsets: (1)  $S_{inst}^+$  contains 709 piRNA samples having the function of instructing target mRNA deadenylation; (2)  $S_{non-inst}^+$  contains 709 piRNA samples without the function of instructing target mRNA deadenylation; (3)  $S^-$  contains 1,418 non-piRNA samples. See Eq.1 and the relevant text for further explanation.

---

(1) List of 709 samples in  $S_{inst}^+$

```

>piR-mmu-73208
UGGUUGUUUCUCUGACUCCUUGAGUAGAA
>piR-mmu-144728
UGACUGUGUGGCUCCACUGGCAAGGGCGGU
>piR-mmu-73976
UAACUAGAGAACUGGUCAGGUCUGAGGUG
>piR-mmu-20429
UCAAUUGGUUGAGUGUUUGUCUGGCAUUC
>piR-mmu-5128
UGGAUGUGAGAUAGAUAGGAGAAGGAAGUC
>piR-mmu-73824
UGGACAAAUGGACUGUGGAUCCAGGAGAGG
>piR-mmu-73165
UAGACAUGUAGUGAUCCUGAGGCAGGCAA
>piR-mmu-49159227
UGAAACUGGAGCAGAAAGAUAGGACCUGAGU
>piR-mmu-79777
UCUGAGAGAAAAGGAAGGUGGACUGAGAA
>piR-mmu-42183
UCUGCAGGCAGAACACUUGGAUCCUCUCU
>piR-mmu-16420
UGCAACAUGUAAGGCUGACUAAGAAAUACGG
>piR-mmu-44903
UAGGAUGCAAUGAUGCAAUGAAGGUGAUGU
>piR-mmu-944000
UGAGCCAAAGCUAAAAGCUCAGGUCGUUGA
>piR-mmu-49614606
UUC CAGUCAUGGAUAUGAUUGCUGGGCUGU
>piR-mmu-66813
UCCCAUCGUUAGGGCCACAAGGUAGGAGC
>piR-mmu-25496
UGAGAUGACGUUGUAGAUGAAAUGGUUAA
>piR-mmu-32805
UGGAAAGUGAGCUAGAAUUUCGGUUGGCCUU
>piR-mmu-50187109
GCCUGAGAAUCUGAGUGGAGUUGGGAUGU

```

>piR-mmu-84680  
CUAUUUUAUAUAUACAGGGACAAGAUGGG  
>piR-mmu-50181027  
UCUGAGGUUCAAGGGUUGCUAGGGGAAGU  
>piR-mmu-73120  
UGAGACGCUUUGACUGUGAAGACUAGGCCAU  
>piR-mmu-75708  
UGGGAGCUCGUGGACGAUGACAGCGCCAU  
>piR-mmu-73754  
UACAAGUGGAUGAUGAUAGAUUGGUGGGC  
>piR-mmu-874439  
UACUUUGUGGGACAGGAGGGGGGU  
>piR-mmu-73036  
AUGCAUUGUAGGAUGAUUGGCACUAUCCACC  
>piR-mmu-49763443  
UAAGAAAGUAGGCUAAGCAGGAUGGGGAAU  
>piR-mmu-73734  
CAGAACAGGAACUCAACAGGGCGGUAACCU  
>piR-mmu-51649  
UAAGAAGGUGUCUAAGGAUGUAUGUGGUU  
>piR-mmu-75094  
UAAGAAAAGUAGUAGGCAGCAAAGGGCGC  
>piR-mmu-74449  
UGAAAAAAUUGUGGAAGAAAAGUAGAUGGU  
>piR-mmu-3520  
AGGCAUCUCUUGAUUUUGUGACUGACGGUU  
>piR-mmu-73093  
UUGGAAAGAAAACUCAUGGAAUUAUGGCU  
>piR-mmu-258605  
UAGGAAGGGUAGAGCUGGGGAGGAGCA  
>piR-mmu-52045133  
UAAAAGCAAGGAGUGUGAGAUGGGGGAGGU  
>piR-mmu-34259  
UUGUUUCUGUAGAUGAAUCAGCUGAUGUUC  
>piR-mmu-81395  
UAACAGCAGUGGAAGUAGUCAGAAUCACC  
>piR-mmu-36441  
UAGCAGCAGUAGACUAAAGCUUUCUCCUGA  
>piR-mmu-76378  
UGCAGAUGAAGAACCGAACAGUAAAAGCAGA  
>piR-mmu-3061  
UGGAAAGGAUGAUCAGGCAGGCUUAGGGUGU  
>piR-mmu-22991  
UAGUUAAUGCUGUGGACUAAAGGGGUAUC

>piR-mmu-102216  
UGGAAGGGAACGCAAACGCAAAGACAAAGGG  
>piR-mmu-267637  
UCUGGACUAUGUCGAGUUAGGGUGGAAAGG  
>piR-mmu-168260  
UGGGACCCUGGCAGUGUAGAAAGACUCC  
>piR-mmu-76844  
UCCAAGGACAUCUGACAGGGAGUAGUAGA  
>piR-mmu-22066  
UAAGAACUACAUGAAUCUCUGAGGACUAUC  
>piR-mmu-92342  
UGACAGGACAAUAGACUUCACUUAGGGCGG  
>piR-mmu-49905  
UGUUGACUGAACCAAUGCAUUACUCUGAGGU  
>piR-mmu-29825  
UCUCAAAAAGGAGCCGAAGUUUGGACAAC  
>piR-mmu-96034  
UCAAGAACUGCUGAAGAAGGAUACCCAGAG  
>piR-mmu-31201  
UUAUUGUAGAUAAAAGGGACAGCAUACCAGAG  
>piR-mmu-90866  
UUGAUUCGGGUUAAGAACAUGGGAUGGGC  
>piR-mmu-6866  
UGGGCUGUCUUUCUGGUUUGACUGAUAGGC  
>piR-mmu-6868  
UGGGCUGUUUGGCAUUGAAGUGUAGAGCCU  
>piR-mmu-74110  
UAAGAACACAUAUCUGCACAUAUGAGAACC  
>piR-mmu-50755517  
UACUGCAUGAAUGAUGAAGUACAAGGGACAGU  
>piR-mmu-50061287  
UAGUACUGUGAUUUCUCUCCAAAGGCGU  
>piR-mmu-22485  
UAGAAACUUCUGCUGUGGAUGGCUGUCCU  
>piR-mmu-17095  
UAUAAAUGUCCAGUAGAGAGUUGGACCCUC  
>piR-mmu-62111  
UAGAAACCUGGGAACAGUCAUGAGGCAGAG  
>piR-mmu-73071  
UGUGAGUAGACAAGAACUCUGUGAGAGGCA  
>piR-mmu-49834752  
UAAAAGUCAAGUAGGACUAAUAAAUAAGAUGU  
>piR-mmu-10103  
UAGGACAGAAAUGAAAUUGCAGUGUUUGG

>piR-mmu-3423  
UAAAAAAGGUAGAAGGUGAGUUGGGUGAGU  
>piR-mmu-43896  
UGGAAAACGGAAAGGAACAGGUCAGAUGGG  
>piR-mmu-44798  
UAGGAGAGUGGAAUCUCAAAGAAGGCAAU  
>piR-mmu-73262  
UUUUACGUGCUGUGUAAAACUUGAGGGUAUA  
>piR-mmu-166433  
UGAGAAAGUGAGAGAAGUGGGAGGAAGGU  
>piR-mmu-9359  
UGUGAAAGUUGAGGCUGGGAAUAAGGUGU  
>piR-mmu-22034  
UCCUGCUGGAUAAAGGAUUACUCACGGUU  
>piR-mmu-98434  
UUACAAUAUCACAUAUUGCUUGGUUGGGGGU  
>piR-mmu-12424  
UGUGUGCUGCAGACAGGGAUGGGUAU  
>piR-mmu-100892  
UCAUGGGAUGGACAUGUAGAUUAAGGAAGA  
>piR-mmu-58378  
UAACUGAUGUAAAUGUAGAGUAGAAGCCGU  
>piR-mmu-22775  
UUCAAAGACUAUUGUAGACAUGAGGAUGGU  
>piR-mmu-50183756  
UCUUUACACAGAAGAAAUCUGUGGGACUGU  
>piR-mmu-41039  
UGACUUGUAGGAAGAUUUUUGAGGUCUGGC  
>piR-mmu-73172  
UUCUUGGUCGUGCCAUUACUUGUAGAGGGC  
>piR-mmu-50659290  
UUCUUAGGGGAGGAGAACAGGCAAGAAAAGU  
>piR-mmu-50232920  
UACUGCCAGUGUCGGUCUUCAGAGGAAAGGU  
>piR-mmu-50739  
UAAGAAAUGCUGUGCAAUGAAUUCGGCCGU  
>piR-mmu-13838  
UCAUUUUACAAAUGAGGAACUAGGCUCAGG  
>piR-mmu-75083  
UGCAGAUAGGAAGAAGAGCUGGCACCCCACU  
>piR-mmu-82527  
UAUGAAAUGUGGGUGUAUUGAAAGGGUU  
>piR-mmu-74021  
UGGACUGAAGAAGAAAAGGGAAUACUGGCUC

>piR-mmu-29304  
UCUGAGCCGAUGUUGAACCAGCUGAGGAUA  
>piR-mmu-6745  
UGGGAUUUAUAGGCAUAUACAACUCGUGGC  
>piR-mmu-73438  
UAAAAGGGAAUCUGUUGGUAACAAGGCAUA  
>piR-mmu-31247  
UAGUUGGAUGGUAUGCUCUAGAGACUGCA  
>piR-mmu-3192  
UGGAACUUGAAAGUUGAAUUCAGAAGCUGC  
>piR-mmu-74045  
UGUGGAACCGGAGAAGGGACAGCACCUGA  
>piR-mmu-73062  
UAAAAAUUGCCGGGCUGAAGAGAAGGGCUU  
>piR-mmu-75112  
UAGGAUGGAUGUGGAAAAGGGACUAGGUA  
>piR-mmu-106781  
UAGAAAGGAUAAGGGCAGUGUAAAGGGUU  
>piR-mmu-77700  
UAGUUGUGUAGAAAUGAAAUGGCUGGGGAU  
>piR-mmu-682511  
UAGUUGUGAGAUGGGAAAGUGGGGGAUGU  
>piR-mmu-154133  
UGAGUUUGACAGAUGAAUGGAAGUGGUUG  
>piR-mmu-75207  
UGCCCAAGUAUGUAGAGGUUACCUGAAGUC  
>piR-mmu-50486334  
UAAAGUUGUGAGCACCGAACAAAGAGGGCUGU  
>piR-mmu-86254  
UGGAAGUGGAUUGAUAGUAGAAGGGGUUU  
>piR-mmu-49112840  
UGAUAGAGUGGAGAGAGGAAGACAGAUAGU  
>piR-mmu-47040  
UAGGAUUUCUGGUAGACAGACAGGCAAGCU  
>piR-mmu-75159  
UUCAAAGAUGGUACUGUUUUAAGGAGGGGU  
>piR-mmu-76394  
UAGUUUAUGUGGUACUAGAGAGCAGCGGC  
>piR-mmu-50799  
UACGAAAAGAAGAUUUCUGUCUCCUUGGA  
>piR-mmu-76420  
UAUACUGUAAGAUGGAGUGGAAAGGAGGGG  
>piR-mmu-50356694  
UAGGAAGUCUGAAAUGAUGAGGUACAUAGU

>piR-mmu-56018  
AAAUGCUGAACUUAACUGCUAGAGGGUUU  
>piR-mmu-49801415  
UAGGUUCUGUGUGCCCACAGCAGUGGCUAU  
>piR-mmu-70102  
UGACAUGGAAGUUGUCAGGUUGUCAGGC  
>piR-mmu-1964806  
UCUUGAAUGGAGAAUGAGGCAGCAGUGGU  
>piR-mmu-76519  
UAGUAGGAUGUAACUUGGAGAGUGGAGAC  
>piR-mmu-73052  
UGUUUGAGUCAAAAAGAAUUCUAGCUGGCAUU  
>piR-mmu-80809  
UAAGUCAAGCCUGGACUGAGAGGCGUCA  
>piR-mmu-9543  
UGUGAGACUCGAGGCAAAAUUUGGCGGU  
>piR-mmu-4531  
UGGAAGUGUAGGAUACCCGUGCAGAAGGUC  
>piR-mmu-25003  
UAAAAGAGGAACCUCUGAACAGGUAUUCGGA  
>piR-mmu-4625  
UGGAAUGGGAUAGAUGGGAUGUCGGACGGG  
>piR-mmu-77397  
UCAAAGAACUUGAAGAUCUGAAGAGGUGG  
>piR-mmu-77860  
UAAGAGGCUUGGGCUAAGACAGAGGCAUC  
>piR-mmu-75493  
UAGUCUGAGAACCUUGGAGAUUAACAGCUG  
>piR-mmu-39257  
UUGGGCUUUUGUUGACUCUUAGUGGACGA  
>piR-mmu-50112724  
GACAAAUGAAGGAUGGCAGUGGAGGAGU  
>piR-mmu-49821094  
UGUGCUGAGAACAGAGAAGAGGACCAUAAGU  
>piR-mmu-209746  
UCAUGGUUCUGUAAUGAGGGGAUGGUGUUC  
>piR-mmu-73088  
UCGGAACUUGUAUCUUGUGAGACAGAAGG  
>piR-mmu-73047  
UGAUAGUUGAACUGACCGAAGCUAGGCAU  
>piR-mmu-88989  
UAGGACAAUGGAGUGAGGAGAAUGCGGGG  
>piR-mmu-52203  
UAGUCAAGUUGGCAACCAAGAAUUAGCACGG

>piR-mmu-13792  
UAGACUGUGAGCUCCUUGAGGACAGGGACAGU  
>piR-mmu-108414  
UAGUAGCUGAGAACUUGAACUUGGCCUUC  
>piR-mmu-18127  
UGACAUGAACACAGGUGCUCAGAUAGCUU  
>piR-mmu-137426  
UGAAUGUAUGUGGCAGGGGAUAGGACUGG  
>piR-mmu-49068820  
UUC CAGGAGGGAAUUCUUGAAGGAGGUGU  
>piR-mmu-219275  
UGUGAAUGAGGGAGCAGUAAGGACCCAGCU  
>piR-mmu-73163  
UCUGAACAGACUAAGAGCAUGACAAAAGCA  
>piR-mmu-14934  
UCAGAAUCCAGAAACUGAAUGGCUUAGAGAC  
>piR-mmu-20069  
UGGGAUCACGUCUUGUGAACAGCUGGAAGA  
>piR-mmu-75517  
UAGUAGAGCAUUGGUUAUGACGGGCGGG  
>piR-mmu-50371057  
UGAGAAUCUUGUCUAAACCUGAGAAGCUGU  
>piR-mmu-122218  
UAAGCAUACUUGGGCUAGGGAGAUAGGU  
>piR-mmu-73846  
UAGACUGAGAGAUGACACCUAGAAGGGUGCA  
>piR-mmu-97313  
UAGUAGAGAAUGUUCUAGGCCAAGGCUGGC  
>piR-mmu-78874  
UCGUGACAGGGCUCUUGAAUAGAGGCUCAU  
>piR-mmu-21137  
UCUCAACAAAAGGAGUGGUUCUGGGGACA  
>piR-mmu-119402  
UAGCAAGACGGAUAGAGUAUGUGACUGGCAU  
>piR-mmu-75706  
UGAUAGGAAAUAGGAUGAAUGGAGGUUGG  
>piR-mmu-6402  
UGGGAGCCUGAGCAUCACUGAGAAGAUGGG  
>piR-mmu-88715  
UCUGACAAGAGAGCUGGCAUGCCUUCUGCCC  
>piR-mmu-73186  
UGGACAAGCUGACCUGAAAUCAUACUCACCC  
>piR-mmu-50270049  
UACAACAGAUUGAACUGUGGGAGGGGCUU



>piR-mmu-139741  
UUUCUUCUGAACCAUCCACACCCUGCUCUCCUGU  
>piR-mmu-73737  
UGUUGAACUCCUGCGUAAGCCACUGGGCAUC  
>piR-mmu-45329  
UAGAAGUUUCUCUGAACAUAGAGCACAGUA  
>piR-mmu-29671  
UAGGACAAUGAGCAGGGAAUGAGAUGGCC  
>piR-mmu-50324724  
UGAAGAAAAGGAUGCUUUGUAGAGGAGGU  
>piR-mmu-74128  
UCAACCUGUGUUCUACUGCAUCAGACAGACUU  
>piR-mmu-65238  
UCAAGGAUGUUGUGACAGGUGAAGUGGGU  
>piR-mmu-76283  
UAAAACUGGGGAAUUCUUGCAAAGUGGCA  
>piR-mmu-117309  
UGCACUUGGGUAGUCGGGAAAUAGGGGCAU  
>piR-mmu-76439  
UAUGAGUUGGAUGUAGAAACCCAGGCUAAGGC  
>piR-mmu-74136  
CAGAACUGUAGGGUAAGAAACUAGGAAGGCU  
>piR-mmu-50018748  
UAGAUGUGGAAGGAAAGAGAGAUGGGGAGU  
>piR-mmu-50303574  
UGCUGACUGUAGAGUGAGCAGUCCAUGUGU  
>piR-mmu-81418  
UCUGACUGGAGACCAGGUCUACAUCGGACC  
>piR-mmu-94179  
UAGGACUUAGUUGGGGUUCGGGGAUGGA  
>piR-mmu-17798  
UAAUAAAGUUCUCUCUGAACCAAACGUGCU  
>piR-mmu-73678  
UGUCCUUUCUUCUGACUGUGUGUAGGUGC  
>piR-mmu-73135  
CAAGCUGUUUAGAAGGAAAUGUGUUCAUGU  
>piR-mmu-73054  
UAACCAAGACGGACUUCACGAUAGUGGCU  
>piR-mmu-49652150  
UUAGAAAAGGAAUAAAGAGGUUUGGGGCAU  
>piR-mmu-73106  
UGUAUAUUCUGAAGACAGAGUUGGUAGAACC  
>piR-mmu-32258  
UAAGGAAAUCUGAGUCCAAGAGGGACAAGUC

>piR-mmu-75195  
UGAACAGGGAAGAUAGGACAUUUGACACAGG

>piR-mmu-63773  
UAGGUUGGAAGAGUACAGUGGACAACGGG

>piR-mmu-92297  
UCAGAAGAAGUGGGAGCUGCAUAGAAGC

>piR-mmu-76365  
UUGAACUAGAUUGUUGGAUCAGCAGCGGC

>piR-mmu-74035  
UAAAGGAAGUUUGCUUUUUGAUCGUUUUA

>piR-mmu-114566  
UGAACUAAAAGUUAGGAGCUGGCAGGGGGA

>piR-mmu-82791  
UGGGCAGGCUCUUUCUUGCUUUGGACGGU

>piR-mmu-127091  
UGAAAACUGGACUUUAGAAGAAAUUGGUUUG

>piR-mmu-647878  
UCCAAGAUCAGGGGAGGCUUCAGGUGGGG

>piR-mmu-48829021  
UGAAACUUUGGAAUUGUGGAGGGCAAAAUGU

>piR-mmu-73076  
UGUGAUAAAUGCUCUGACCAGAAACACCUU

>piR-mmu-82893  
UGCCUUGGGCUGAACUGAAUGCAAAGGGGG

>piR-mmu-97374  
UCCACAGGAGACAGUGCGAACUUGAAU

>piR-mmu-85329  
UGGUAAACACUCUGAACUCUGUGGGACAC

>piR-mmu-248914  
UAAACACCCCUAGGAGCCUCUGCAGUGCCAU

>piR-mmu-136943  
UCCUGAGCGUUCACGGAGGCAAUUCAACA

>piR-mmu-73057  
UGUUAGAACUGGCAGAAAGUAGUCUCAAAACC

>piR-mmu-126088  
UACAAGUAGGGGAUUUUGAAGUGGGGGAUU

>piR-mmu-73442  
UGACAGAAACUGCUGACCUAGAACCGGAGA

>piR-mmu-75427  
UGGAAGCUGUAAUCUCUCAGAGAAGGUGA

>piR-mmu-81328  
UCUGACCAUGCUGUUUGGCCACACUCUGC

>piR-mmu-264247  
UCAGAAUAUCAGAGGGCUGGAGAGAUGGG

>piR-mmu-48770640  
UAGCUCAGUGAUGGACUAUGAUGAGGGUGU  
>piR-mmu-90885  
UUUCCUUGGAAUUCUGGCAUAGAAGUAGACGU  
>piR-mmu-1342663  
UUCUCGUGGGAUCUGGGUAGGGGUU  
>piR-mmu-79365  
UAGAUCUCUUGAGAUGUUUGCAAGCUGACU  
>piR-mmu-547983  
UGGCUUUGAACUCAGCUUGGAUGGCCAG  
>piR-mmu-80713  
UUCUGUUCACGAACAGGAGUAUGGAUUAGG  
>piR-mmu-77333  
UAGUAGAUACUCAUGGGAGAGCAAGGCAGU  
>piR-mmu-102000  
UCGGGAUUUUGAGAAUCAAAAGAUGGGACCUU  
>piR-mmu-85141  
UUCAGAAAAGACCUAGGAACUGAAGGUGGA  
>piR-mmu-496  
UGCAGCAGGGCUGGGACUAGGAUGGA  
>piR-mmu-83816  
UAGACACUUGAGGGUUGAGGAGAGACUGA  
>piR-mmu-106003  
UGUUAAGGAUGCAGGGACCAAACAGGAGGG  
>piR-mmu-47978  
AAGGAAGACACUCUGAGUCUAUGGCAGUGC  
>piR-mmu-73069  
UGAGUAGAACAAAUGGGGGCAAACCCUAGC  
>piR-mmu-73178  
UAGAGACUGACAAAUACUGCAGAAAGCCUGU  
>piR-mmu-108624  
UCUUUAAGUGGACCAGGAGCAGAGGGAGC  
>piR-mmu-8505  
UGUAAA AUGGAGAUGAUAGCACACAUUUGG  
>piR-mmu-30783  
UCAGAUACAGAUUAAGAACUUCAUACUUGC  
>piR-mmu-112615  
UGGAAGGUAAAAGGUAGAUGGAGUCAGCAC  
>piR-mmu-93843  
UGGAAGGUUGAAAUGGAAAGAAGAGACAGA  
>piR-mmu-86787  
UAGAAACUCUGCUUAAGAGAAGAAUAUGACA  
>piR-mmu-50933064  
UGGGAAGGGUAGAGACUGGCCACAUGAGU

>piR-mmu-84905  
UAUUUAGAGGAUGGAGUGGUAACCACGGU  
>piR-mmu-14327  
UCAAUAAAUGUUUGUUGGGUAAAGGGGUC  
>piR-mmu-73802  
UAGUAGAAGACAAGAACUCUGCCAGAGGGU  
>piR-mmu-22484  
UCAAUAAAUAGGGAGUGAUGGUUAUAGAAC  
>piR-mmu-73907  
UUUUAGAAUGUAGAGAAACUAAGAUGGUGG  
>piR-mmu-75475  
UCUGAAUGGAUGGAAAACGGAAAGGAACA  
>piR-mmu-81092  
UAAAUGGUGAACUUUGUGGAGAUGGGGAUG  
>piR-mmu-73169  
UUCUAACUCUGCUGUGAGUGAACUUGGCUU  
>piR-mmu-73204  
UGAAAAGGACCCAAGUACAGAAACAGCUC  
>piR-mmu-77180  
UCCAUGGACGCAGAAACCUACAGCAUGAU  
>piR-mmu-74381  
UGACACAAAUGGCAGAGCACAGGAACACUU  
>piR-mmu-79614  
UAGAGUGUAUGAUGACGGAGGCUUUAUCU  
>piR-mmu-49019142  
UUGCUGUAGAGGAUAAAGGCAUGUUCAAGU  
>piR-mmu-94836  
UCUGUAUGUUAUAGGACAAUGAGCAGGGA  
>piR-mmu-76947  
UGGGCUGGAACAGAUAGAAAGGGAGAAGAU  
>piR-mmu-76309  
UAGAGAACUCCGUUCUGUAGCUGCCGCAUG  
>piR-mmu-50912235  
UUGUUGACUGGGGUUUCUUUGUAGGAUGGU  
>piR-mmu-17414  
UGACAGAACGAUCAAGACAGAGAUGGAGGG  
>piR-mmu-50352  
UGUGUAGAAUAGCUCAGGUUUUGGAUAGGU  
>piR-mmu-50607258  
UGCAGAUUUGUUUGUCCAGGAGAGAGGGUU  
>piR-mmu-84536  
UAAGUGUAGGACUCUCAGAGGCACACUUUUU  
>piR-mmu-49471  
UAAGCAGAUUGUGUAUGUAUGCAGAAGUGU

>piR-mmu-83936  
UAAGAGGAGACUAAUGACCUGCCAGAAGGG  
>piR-mmu-77865  
UAGGCUAAGUGACAACAAGUGGAGAAAGGG  
>piR-mmu-29215  
UACAUUCACAAUAUGUUAGAACUGGCAGAA  
>piR-mmu-143046  
UAGAUAUUGGUAGAGGUAAUUUCAGG  
>piR-mmu-74530  
UCUUUUUCUUGCUUUGGACGGUUUCCUCUUC  
>piR-mmu-208672  
UAUGUGGCAGAGGUAGGUAGAGGAUGG  
>piR-mmu-74367  
UAGGAACUGUCUGUAUAUGGGAGACAAUG  
>piR-mmu-78710  
UAUCUCAAGGAAUGAUAGGAACGUGGGGU  
>piR-mmu-4297  
UAACAAAUCGGGAAGGUGACAGAGUCGG  
>piR-mmu-81723  
UUGAUGUUGGACAAAGACCAGUUGGUGGAUG  
>piR-mmu-73042  
UAGUAGAAUCAAAACAGCAAGAGAACCUUAGG  
>piR-mmu-85694  
UGGCAUCUGUUUGAUGUUUGUGAGUUGGG  
>piR-mmu-15401  
UAAUACACUGAGCAGUGGACUCCGUGAUU  
>piR-mmu-66730  
UCCAGGGCUAUAUCUACUGAACACGGCUU  
>piR-mmu-44673  
UUCAGGACGUUCUGCCAGAAUGACAACAGU  
>piR-mmu-49281  
UGUUUUCAUAUAGACUGGCAUGGUACCUU  
>piR-mmu-654474  
UUGGAAGGAAUAUAAGGGUCAGAAAUGGG  
>piR-mmu-73555  
UGGAUUGAUUACUGUGGGGAUGGUGCUGU  
>piR-mmu-14388  
UGGGAACUCUGUGUGGAAGUAGGUGGUA  
>piR-mmu-73793  
UACAGUUUUGGAUCACUGAGCUAGGCAGAGU  
>piR-mmu-110814  
UGUAGGGCUCUAAUGUAGACUGGUCACAGC  
>piR-mmu-74007  
GAGAUGGACGGAACCUACCUUCAUUGGCGGG

>piR-mmu-515639  
UGAGAUGGGAAAAGGAGGUAGCGUUAGGU  
>piR-mmu-471895  
UAUGUCUCUGUGAACAGUGUGAUUGUCAUG  
>piR-mmu-214774  
UGCAAAGGGUCUGUAGGGACUUAGCUGAGG  
>piR-mmu-71227  
UGAGGUUUUGCAACAAGUAGGAUUGAAAUGGU  
>piR-mmu-152897  
UCCCCUUUUUGGCAGGGUAGAGGACUGG  
>piR-mmu-73635  
UAAACUGUUGGGUCGCCGUCGUCGGUCGUU  
>piR-mmu-73227  
UAAAAGAACCUGAAAAACAAGUCUUUAUUC  
>piR-mmu-48979  
UUCUCUAACGAAAGAGGACUGUCGGGUUC  
>piR-mmu-75548  
UGGUGGAAUUGUACAAAGUAUUUGAUAGGU  
>piR-mmu-6121  
UGGGAACCUGAGAGGAUGGAAAUCUGGA  
>piR-mmu-10971  
UAAGAUGAGUGGGAAAUUCAUGCAGUGU  
>piR-mmu-103411  
UGGGGAACAACAUUGGAUGAGCUGAAGGA  
>piR-mmu-31129  
UGAACUCAGAAGAUAAAGUGCCCUUCAGGA  
>piR-mmu-14678  
UCCAUGUGUUGGGAUUGUCUGGUCUUGUU  
>piR-mmu-75066  
UAUAGAUCAUACUGGAAAAGGAAGCAGGCU  
>piR-mmu-1797128  
UCCAAGCCUCUUCUUGGCUGUCGUCGUC  
>piR-mmu-73374  
UGACACAGGACAAGAAAUGAGCACUUGGC  
>piR-mmu-131396  
UCAGACAGGAAUGUUAAGGAUGCAGGGAC  
>piR-mmu-88429  
UGACAGCAAGGACACGAAGGGAUAAGGCC  
>piR-mmu-27112  
GAGGCUGUGAUGAAGGUUGAUAAGUGCUU  
>piR-mmu-33292  
UGACUGAGCACUAGAUCCAUCCACGCAGGU  
>piR-mmu-49016694  
UCUCUGGAUAUGAGUGAGCAGCCGGGCAGU

>piR-mmu-76987  
UGUAAA AUGGGGAUAGUAUUGGGUAAAGCA  
>piR-mmu-73825  
UUUGGAUACUGAGUGCUUUCGGAGAUGCAU  
>piR-mmu-49394  
UAGCAUGGAUGGUGAGCUAGGAAAGCUAC  
>piR-mmu-649804  
UGAGUGAGGAGAGAGAUGGGAACAGGC  
>piR-mmu-138477  
UGGGAGUGAGGCAUUAGGAAUAAGUAGUU  
>piR-mmu-73249  
UCUGUUAGCAGAUACUGGAGAGAACCAUUC  
>piR-mmu-74852  
UUGAGAACCAGAAACUACGUGCUGAUCAGU  
>piR-mmu-267467  
UCUGAUGGAGAGGAAGUUUGCACCCCGAG  
>piR-mmu-20652  
UAGAACAUGACCUAGCUGAGGAUGACCC  
>piR-mmu-21697  
UCUCAGUGCUGGAGACUUGACAUGGUACC  
>piR-mmu-79223  
UGACACUUCUGAGAAGACAGGGUUCAGCCCC  
>piR-mmu-38815  
CAGAAAGACGCACAGGGACCCUUGGAGGA  
>piR-mmu-74480  
CCCUCUCUGAAAAGUUGGUAGGCUGGAAGU  
>piR-mmu-86768  
UAAGAAAGCAGGUGCAAGGGAAUGGACAU  
>piR-mmu-112691  
UGGGAAGAUGAGAGGAAGGACGGGCAAGC  
>piR-mmu-151158  
UACAUAAAGUGGACAUGGACACCACAGUG  
>piR-mmu-50884576  
UGGAAGACAUGUCUGCAGAGCUGAGUGAGGU  
>piR-mmu-83446  
UAUAAAUGGAAGGUGUGACCCAGAAGUCAGG  
>piR-mmu-16374  
UAGUCUGGAAUAGACCUGGGAGAAUGGUAGC  
>piR-mmu-80540  
UAAAAGAAAAAACAAGGCAGGGGAACA  
>piR-mmu-79469  
UAGGAAUAGGCAAGCAUGUGAGAUUAUGUG  
>piR-mmu-22730  
UGAGAAAAGAUGAAGCAAACGUAGUGGAAC

>piR-mmu-82388  
UUUGGGAUAGAUGAACUCAUGAUGGUGGAA  
>piR-mmu-53438  
UAUAGAAAUUGAGACAGGACAGGUUCGGU  
>piR-mmu-33565  
UCCUUGAACAAAGAGAACAGAUGGCUUCCCAC  
>piR-mmu-80614  
UAGGUCAGGAACUAUGGACAUGAUCAGGG  
>piR-mmu-75463  
UAGAAAUGAUGGGACGUGUUUGAGGUU  
>piR-mmu-1187707  
UCCUGGCUGAAGAACUUGGAAGCCUGAUGG  
>piR-mmu-73679  
UUGGUUAAAAGAUUAGACUGUUUAGCGGUG  
>piR-mmu-5083559  
UGUGAAAAGAAGAGAGAUGACUGUUGGUGU  
>piR-mmu-4668  
UGGAAUUUAGUGUCAGUCUGACUGGAUGGA  
>piR-mmu-13956  
UGGGAUUAAAAACAUGAACCAUGGAUGG  
>piR-mmu-48904071  
UGUGAAGAGAGAUUGUACAAGAGCAGGGGU  
>piR-mmu-73561  
UGGCAGGAAUCCUGAUGAACAAAGUUUGACUC  
>piR-mmu-144484  
UGAACUUUGUGGAGAUGGGGAUGGACCGC  
>piR-mmu-209960  
UCCAGGAUGAGAUUGAAGCAGGGUGUGUGU  
>piR-mmu-458116  
UAGGAUGAGUUGGCUUGGGUUGUGUGUGU  
>piR-mmu-73584  
AUUAUUCAUGACUGGGGAUGUUCUAAGAC  
>piR-mmu-101972  
UCACCAGGCUGGAAUUGAAGAUGUUCAU  
>piR-mmu-180320  
UAGGAAGAAUGUUCUGGGUGGAGGGGGGA  
>piR-mmu-73916  
UACAUGAACCCUGAACAGAGGCACUCAA  
>piR-mmu-73720  
UCUGCAUUUUGAUCAGUUGGCUUUACAU  
>piR-mmu-81690  
UGAAUCUUGAAACUUUGGAAUUGUGGAGGGC  
>piR-mmu-76885  
UGCUCUUACAGUGACUGAAAACUGCAAC



>piR-mmu-81258  
UCCUUUCAUAGUUUAUGAAAUAGUCAUCGG  
>piR-mmu-127562  
UGCAGUUUUGAAGGUGGUUUUUGCUAGAU  
>piR-mmu-480392  
UCAGUGGACUGAUUCUUCUCUAGUAGCUGGC  
>piR-mmu-74002  
AUCUGUGAAAUGGAGCCAGCUACGUCCUCU  
>piR-mmu-73103  
UUAGAGCUACUACCAAGACUGUUUGAGAAUC  
>piR-mmu-50297399  
UGCAGCUGUAGGGCUAUAGCUUAGCAUGGU  
>piR-mmu-75940  
UAAUAAGGGAUUGUAGCUCCCCAAGGUU  
>piR-mmu-73210  
UAGAGCUAAAGUAGAACAGACCAUGAGUGGC  
>piR-mmu-74935  
UGAAAGGAAGUAGGCUGACUGUUUUCAGG  
>piR-mmu-270065  
UGAAGAGUCUCUACAUGGAACAUGGCA  
>piR-mmu-73500  
UGUGAAGAGACGUUAACAGUGCAAUACAA  
>piR-mmu-567398  
UGUGGCUUUGUAGAGCUAAAACCCACACAGGC  
>piR-mmu-13879  
UGCAACUUUGACAAGAUCUACAGCCUGACUC  
>piR-mmu-49464676  
UCUUCUUGCUUGGGCUAGUUUUAGAGGCAU  
>piR-mmu-74949  
UAAUCUAGAGUGGGACAUUGCCAGUGCAU  
>piR-mmu-73037  
UUCUCUUACUGUAAGAUCUGUAUAAGAAGA  
>piR-mmu-68560  
UCUGUCCCAGGUGUGACACUGCCGUCGGU  
>piR-mmu-86461  
UGGGCUCUGGAUAGUCAACAAAGGGAGAGA  
>piR-mmu-49893418  
UAAUAUGGAUGAAUGUAUGUGGCAGGGGU  
>piR-mmu-50046473  
UAUAAGACUCUGGCGAGCCUAGAUUAUCGGU  
>piR-mmu-48439  
UCUUUGGUCUCUUAAGGUAGAACAUGGCUC  
>piR-mmu-127371  
UGAGAGUAAUGAGGUCGAAAGAAGGGG

>piR-mmu-80520  
UUAAAUGUUUGUAGGAUGCAGCUGGGAUGG  
>piR-mmu-79484  
UGACUGGAAAAAGAAGAUGAAGAAGAGGA  
>piR-mmu-86049  
UGACUGGAAAGAGGCUCAAAACCAUGGGAGA  
>piR-mmu-215312  
UGCCAGGGAGACUGUAGUCCUUGAGCAGGGA  
>piR-mmu-98906  
UAGACUGGUCACAGCAGCUGACACAAAGGUU  
>piR-mmu-5181133  
UGCUGGUGUGUGGGGCAUAUGUGGCA  
>piR-mmu-2536846  
UCUUGGCUGUUGAGCCAAAUGAAGGCGUGGG  
>piR-mmu-1227022  
UGGGUGAGCGGGAGAAGCAAGGAGCAGC  
>piR-mmu-123199  
UCUUGGAGCUUGUGAACUUGGCAAAGUAGG  
>piR-mmu-16576  
UAGACUGGGCUGUCUCUGUCUGCAGAAACACU  
>piR-mmu-73171  
UAAUCAACUCGUGAACAGUGGCAUUUGUG  
>piR-mmu-42003  
UGAGAAAGUUGAGCAGUCCAGAGAUGUC  
>piR-mmu-73078  
UGAUUUCUUUCAUUGUAGGUCUUGGACUGU  
>piR-mmu-267404  
UCUGAGGCAGAGACUCUGUCGGCCCAUGC  
>piR-mmu-37740  
UGAACACGGAUACUCAGACACAUACCCUGGC  
>piR-mmu-136273  
UAGAUGGGAAAGAGAAGGGAAAUAAGCGUG  
>piR-mmu-80703  
UGGGAGCUCGAUUAAGUGAAAGUCAGGGAU  
>piR-mmu-142040  
UAAAUGGUAGGAAUAUGAGGGCAGAGUUGG  
>piR-mmu-109324  
UUUAUGGGUUUUUAGGGUAGCAGAGUUGGU  
>piR-mmu-45250  
UAGGACUUCGCAAUGGUUGCAAACUUGGG  
>piR-mmu-82267  
UGGACUUAGAUCAGCUCUGCACAGUAGCUGC  
>piR-mmu-100201  
UGUGAGCUGUCUGACAUGAGUGCAUGGA

>piR-mmu-84685  
GCUUGAGUUGAGACUGUCAGUAGGUGUU  
>piR-mmu-144056  
UCUAAGAACCUGGAAGGGCCGUGGGGAC  
>piR-mmu-76585  
UCAAUUCUUGUGGAACCCUCUAGACAGGUAU  
>piR-mmu-593970  
UUCUUGUGGCUAUCUGUAGAAGGCACAGAGU  
>piR-mmu-285247  
UGUGUCUUCUGUAGGCCUUCUAGAAGGGC  
>piR-mmu-73039  
CUUGCUCUUGAAGAAGACUGGGACCAUCAUCU  
>piR-mmu-50709768  
UGAGAUGUAGUGGAGCUGGUGUCAGAAGGU  
>piR-mmu-65521  
UCACAGGAUGUUCUCUGGAUGGUAGAGGC  
>piR-mmu-90138  
UUUUGGCUUAUGGUUGUAGAGGGUUAGAGU  
>piR-mmu-50153239  
UCAGAGCACUGUUGGAAGUAUGGGAGAGGU  
>piR-mmu-63410  
UAGGAUGUAGACGGUUCUGGUUUUUGCUGU  
>piR-mmu-74390  
UGCUGACUGAUUAUGUGACACGUGUU  
>piR-mmu-73617  
UGAAAACAGUGUGGAUGGCAAACUUUGG  
>piR-mmu-94248  
UCUCAGACUAAGAAGAAAGGCAAGCACGGA  
>piR-mmu-83427  
UAACAGAAAACACAACUGAGAAGGGCUAG  
>piR-mmu-29057  
UACAGAAAUGAACUUUCAAAAGAAGCA  
>piR-mmu-74571  
UAGGCAGUGUGAAGAAAGGAACCGUCCGGC  
>piR-mmu-48507  
UGGCUAAAGUGAAUAUAUGACAGAUAGGC  
>piR-mmu-58585  
UAGGAAUUCUGUGAACAAAUCACUGGAGGC  
>piR-mmu-121028  
UUGUAGGCUCUAAACACCUCUAGUGGCAGGC  
>piR-mmu-50922024  
UCUGAAGAGACCACAGUGACAGAAGGACAGU  
>piR-mmu-50710641  
UAAGACUGAAGCGAAUAGGGACAAGGCUGU

>piR-mmu-110258  
UCAGAGAAUGGAAUGGGCGUACUUGGUGU  
>piR-mmu-94434  
UGUUGAAUGGAUGAAUGGGUGGAUGACAC  
>piR-mmu-74356  
UUUGAAUAGAGAAACAAUGGACCAGGAGA  
>piR-mmu-103403  
UGGGAUUCGGAACCGGGGAAGCUGCUAGGC  
>piR-mmu-15360  
UAGACUUGAGAAUAUUUGGGACAAGCAGGU  
>piR-mmu-103639  
UUUGUCUUAUUGGAUUUUGUUUGUUUGGU  
>piR-mmu-108839  
UGCAGUUUCUGAGGGCAUGAGAAGCUCCCU  
>piR-mmu-102330  
UGUUUAAUGGGUUGGAAUGAGGCUGCUUUU  
>piR-mmu-51460  
UUGAGUCUAGAUGAGUGGAAAGGUGCUGU  
>piR-mmu-35772  
UACAAAACACAUUGUAGUCAGGACACGGAU  
>piR-mmu-73260  
UUUGUUUUCGGACUAGUUUGAAGACCAUG  
>piR-mmu-75012  
UUUGACAGAUGGCUGAGAUCAGAGAAGGU  
>piR-mmu-49800739  
UACUUCUCUGAGCAAUGAGAGCAACAGCGU  
>piR-mmu-84271  
UCCAGUUAGAGAUUGGUCAGAAAUGGCA  
>piR-mmu-74277  
UUUGAACAUUGCAGUUCAUAGAUACUCACCCU  
>piR-mmu-50546  
UAGUUUGAAAUGAACUAAGAUGGGGGACA  
>piR-mmu-110689  
UGGACUUAAAAUACGAGGAGGUGGGGGGUU  
>piR-mmu-77918  
UUUAAGUUGGCUGUAAUAUCACCAGAGGA  
>piR-mmu-1675985  
UGCAGAGGAGGGAAUGGCUCAGUGA  
>piR-mmu-77257  
UGAGAAAACUGUGAGAUGGAGAGACACAA  
>piR-mmu-74690  
UAAGAGAAAAGCUUGACUCUGCAGAGGAA  
>piR-mmu-85825  
UCCUUUGGACUGAGGAAGAAGGAGAAGGU

>piR-mmu-84894  
UAGUCUCUGACCUCUGACUAGUAGUACGUU

>piR-mmu-102993  
UAGCAGUCACUUGAGGCUCUACAAAUCGGCGU

>piR-mmu-63810  
UAGGUUUUAGUGGACAGCAUUUGGCAGA

>piR-mmu-73124  
UACUGUAGUUUGCUUCAGCCUAGACAGCAC

>piR-mmu-18060  
UAAGUAGUUUAGUGUCUGAAUGGAUGGA

>piR-mmu-73783  
UUAGAGCUGAAUAGAAUAGGUAACAAAUGU

>piR-mmu-78531  
UAUGUUAAGCAAUGGAGAAGGGAUGGAUGA

>piR-mmu-74559  
UAAAGAUGGAACCUGACCAAAGACAGGGCAC

>piR-mmu-94324  
UGAUAGUAGAAGGGGUUUGAUUGGGGAC

>piR-mmu-73250  
UGAGACAAAUGGAUAGCUGGCAUGAAGUU

>piR-mmu-163414  
UAGAUGAGAUAGUGGUAGGCAGGGCAGGUU

>piR-mmu-96127  
UGAUCAUAAGGAGAGAGUUGGCAGAAAGGG

>piR-mmu-19000  
UGAAAGAAUGAACUGCCAGACUGACUGCCC

>piR-mmu-198257  
CUGAAGUCUGAGUUGAACCCUGGCGGCUGUGU

>piR-mmu-81439  
UGCAUUGUUUUUAGCUUGAUUGUGGGUG

>piR-mmu-49429347  
UUUCAAGAUGUGAUUUGACAUGGGGGCAU

>piR-mmu-89956  
UAUUUAUUGAACAUAGAAGAUUGUGGGGGC

>piR-mmu-100938  
UCUGCUGUAGACAGCAAGCGUCUCUAGCUG

>piR-mmu-73727  
UUCUGGCUUGCACUGAUUUCUUCACAGAU

>piR-mmu-75577  
UGACUGUUUUUCUUGUACAAGGCAACCCCAAC

>piR-mmu-17066  
UCUGUCAUUUCAGAAUGUUUUGCUCAUGCA

>piR-mmu-50015  
CAUGAUUGUAGAUCGUGAUGCACAGUGCAGU

>piR-mmu-543441  
UGGAGCCUGUGGGCCCUGCCUUGUGAGCGGU  
>piR-mmu-73951  
UUCUUGGGACUAAUAUUGAUGGCUUUUAUU  
>piR-mmu-73716  
UGACUAGAUAGGAUUUAAGGAUGGCUCCCG  
>piR-mmu-94314  
UGAGACUCUGUACUGCUGAGCUUGGAGGG  
>piR-mmu-123043  
UCCAGAUGUAGGACUGUUUGUGUGGGUUU  
>piR-mmu-22159  
UAGGACAAAUGAAGAUGCCAGAAGGCUC  
>piR-mmu-75489  
UGGUAACUCUGUUGGAUGAGGCUGGCACC  
>piR-mmu-14883  
UGACAACACAGAACAUGCUAGAGGCCAAGA  
>piR-mmu-74036  
UGGGAACUAUAUUCAGGGAAUUGACAGCA  
>piR-mmu-6189  
UGGGAAGGAUGAUAGCAGAUUGGGCAGA  
>piR-mmu-49898472  
UGUAAAGGAAAGAGAGGCAAGCUGGAGGGU  
>piR-mmu-77642  
UAAACUUUGAUCCAAAUCAGGCUUAGGGCC  
>piR-mmu-79547  
UUAACUUUGAUCAGUAAGUUGGAAGCUGG  
>piR-mmu-910732  
UCCAGCUUUGAUGUGCUGUGCGGGUGGUGU  
>piR-mmu-84826  
UUUUUAUGCAAGGAUCUUGGACACGCAAG  
>piR-mmu-19475  
UCUGCAACUAGAUGGACUUGCUUGGAUGU  
>piR-mmu-14513  
UAGGACAGUAUGUUGAACUCAGCAGAAUCC  
>piR-mmu-70052  
UGACAGUUCUGACAUUGCAGGUACCUCAUC  
>piR-mmu-74516  
UGUAUUUCUGGACAGAAUGACAGCUGUGGAU  
>piR-mmu-75645  
UAUUCAGACUUAGAGGUAGAAAUGAAGGGC  
>piR-mmu-54124  
UGAGAUUUUCUAGUUCUCGUACACCUGGCAGA  
>piR-mmu-81404  
UAGAGUUCUCUGGACUUUUUGAAUACUGGU

>piR-mmu-26363  
UCCAGAAAACUUGGAGAUGUGCACUCAGA  
>piR-mmu-55877  
UAACUGUGGGAAGAUGUCUACAUCCCAGGA  
>piR-mmu-73187  
UGAAAAAGGAAUGUGUUCUCGCUGUGGCAU  
>piR-mmu-267082  
UCUCUGGACAGACAGACAGAACAGCUGAUAUC  
>piR-mmu-74921  
UAGUAGUUCUUGGACUCUGAUGGAUGGA  
>piR-mmu-24021  
UACAGACACGGCAGUUUAGAUAGGGUUUGU  
>piR-mmu-322066  
ACCUUUUAUAGAGACAGGGAGUGGGACA  
>piR-mmu-106245  
UUUUUUUUUGGUACUUAGAGGGGAAUGAUGU  
>piR-mmu-109374  
UUUUUUUUUGUCUCAAGUUGAAUGUACCGGC  
>piR-mmu-73309  
UCGGACAGUGAACAGUGUUGUAUAAGCAGA  
>piR-mmu-40085  
UAGACUGUAUGAUUAUAGGCUUGAUGUCCUU  
>piR-mmu-12536  
UGACUGGAAAUCUGUCGAAACACACGAAGG  
>piR-mmu-161551  
UAAAAGGGAAGUGAAGAAGGGAGACUAGU  
>piR-mmu-113112  
UUGGUCUGUGCCUUUUGGACAAGAACUACGUC  
>piR-mmu-903276  
UCAAAAGGGAAGAGAAUACAGGGAGGAGG  
>piR-mmu-152225  
UAUACAAAUCUAGGGGGUAGAAAAGGUG  
>piR-mmu-101225  
UGUAACUGUCAUGGUGGAGAGGGAGGGGGU  
>piR-mmu-74301  
UACUUGUAGAGAAAGCUGGAGUUGAGCGG  
>piR-mmu-73899  
UGUGUGAAUCUUGCUGUGUGUACUUACAAC  
>piR-mmu-77140  
UGUGAACUCUACAGUCAGCACUGCUUCCAA  
>piR-mmu-24445  
UACUUGUAUUUAUGCUGAGCCAUGGUGGCC  
>piR-mmu-81449  
UGUGAACUCUGCUUCAAGAACAGGAUGAUG

>piR-mmu-73206  
UUAAAAGACGAGUGAGAACUAACAAGGAGA  
>piR-mmu-73928  
UACAAGCAGUAGUUUGGAUUUAUUCUUGGU  
>piR-mmu-73537  
UUAUGGUCGAUUUGAUGUUUAGGAAUGGUA  
>piR-mmu-76520  
UCCCAAAGACUUACUGAAACAGAGAUGUGC  
>piR-mmu-50478  
UAAAACAAGUACUUCUAAGUACUAGACAGCA  
>piR-mmu-68744  
UCUUGUUUUAAACCAAGAUCGAAGGCCAGC  
>piR-mmu-107343  
UGGGACUCAGGCAUUUGGCAUGAGACACUC  
>piR-mmu-266326  
UCGUCAUCUCAAGACUGAGAAGCAAGGCUA  
>piR-mmu-105890  
UGGACUCCUGAAGACUGACAGUAAAGGCAUG  
>piR-mmu-50373  
UAUGAACCUAGCAGAAGUGAUAAUAUGCACUC  
>piR-mmu-81440  
UGCGUAGUUUUGAAUUCUUGGGGGACGGA  
>piR-mmu-50871130  
UGUGACUAACGAGCCACCAGCAGGGAGAACU  
>piR-mmu-79096  
UGGGAUGGCAGAGUAAGAUGUUUGACAGUU  
>piR-mmu-74611  
UUUGUCUUUACUAUAAGAUGGCUGUCACCC  
>piR-mmu-38315  
UACAUCUGAGAAUUCUGUGUUGGUUGAUGU  
>piR-mmu-79059  
UUGGAGGACUGGACUACAAUUGGGAGGA  
>piR-mmu-34079  
UGCAAGGUCAAUGUAGAACUGGCCUGGC  
>piR-mmu-116199  
UAAAUGGCUGGGAUUGGGUAUAAGGAGC  
>piR-mmu-63216  
UAGGAAUAUGAGGGCAGAGUUUGGUAGUGG  
>piR-mmu-14241  
UCACAACAACUGUGUGGAGGUUAUAGGUGU  
>piR-mmu-76933  
UUGAAACCUGAGACUCCAGAAGAUGCCACC  
>piR-mmu-110272  
UCCAGAAAUAAGAGCGUUUGAACAGACCAGG



>piR-mmu-77266  
UUUGAAACUGUUGGUAUGUAUUGGAAGGG  
>piR-mmu-74288  
UUGAU AUGUAGGAUCCCUCUCAGAUGUCA  
>piR-mmu-31292  
UAGACAU AAGGAUAGGUGAUACAGUGUUGG  
>piR-mmu-49198224  
UAAAUGUGGGCUCUCAAAUGAGAAAAGAUGU  
>piR-mmu-49721637  
UAAGGAUGUAUGUGGUUCAGUAGUAGAAGU  
>piR-mmu-161500  
UAAAACAAGGGCGGUUGUGAGAAAGGGAA  
>piR-mmu-74168  
UGCUGACUGUAUGACCUAAGGCAAGUUUCU  
>piR-mmu-127800  
UGGAGAUUUGACUUAUGUGAGCCGGGGGA  
>piR-mmu-56056  
UAAACAACACUGCUGUAUGAGACAGGCGA  
>piR-mmu-213930  
UGAGGCCUGUUUAGCUGACUCUGUGGGCUG  
>piR-mmu-616014  
UUUUUGGAGUUGUGGUCUUGUGGAGGCAU  
>piR-mmu-1636837  
UCUUGUUUUUGUUGGAUGAGGAGGGUGA  
>piR-mmu-89308  
UGAAACAGUUUGGAAGUAGGUAGCAGA  
>piR-mmu-9338  
UGUCUUUACUUUGGUCUGAUCAGCUUGGC  
>piR-mmu-452739  
UAGAUGGAAGUCUGAUGGUGGUGGUGGC  
>piR-mmu-73228  
UAGUUGUUCUGUUGUACAAGUUUGGAAGCA  
>piR-mmu-34313  
UGUGAAAAUAUGCACUCUGUGGAAGGCUC  
>piR-mmu-187454  
UGUAAAAUAAGACAUUUGUAGGCUGGUGUG  
>piR-mmu-29349  
AUACAAACAACAUUAAAUGGACUCAGCAG  
>piR-mmu-128637  
UUGCUCUGUAGUUCAGCUUAAUGUCAGGCA  
>piR-mmu-105651  
UCUGAUGAGAGUUAGGCAGCAUGGGGACA  
>piR-mmu-83109  
UGGCUGGAAUUCUUCUGAGGGAUUGAUGGU

>piR-mmu-45671402  
UGGGUCUGAGGGUAGAGGAAGGGUGA

>piR-mmu-4281  
AGUUUAUUAAGGAAGAAAGCAUCUCGGGG

>piR-mmu-45979  
UAAAGAAACUCUACUGCAUGAAGCUAUGG

>piR-mmu-170408  
UUGAAGGUAGAGAAGGUUACCCCAAAUAGGGU

>piR-mmu-48811359  
UGCAAGUCGGAGUAGACAGUUGAGGAGUGGU

>piR-mmu-77692  
UAACUGGGUAACUCGUUGGAAAUGGUA

>piR-mmu-208651  
UAUGUCUCAUAAAGACUGUUGGAAUAGGGUG

>piR-mmu-73533  
UGAGAAUUAUGACAGAGCUAGAUGGUGCAG

>piR-mmu-43196  
UUCUAUGGACAGAAAGGAAAGCAGAUGGU

>piR-mmu-75011  
UGCAAGUGUUCGGGUUGCUGACUGCAGAGG

>piR-mmu-29276  
UGUGAAGACUUCAUGACGUUUAAGGCAUC

>piR-mmu-81510  
UGACAGAGCUCCGACAGUACAAAUAGAAAUGC

>piR-mmu-52608  
UUGACAGUUAUCUCCUGCUGUAGGAGGCAUU

>piR-mmu-74575  
UGGACUCCUGGACAGACAGACAUACUGCCUC

>piR-mmu-82026  
UAGGAUGGGGAUAGAGUGUAUGAUGACGGA

>piR-mmu-68191  
UCUCAGGACCCACAUGAUGGAAAGAGCAGA

>piR-mmu-74117  
UAGGACAGAAGGAUUAAGCAGCGCAGUA

>piR-mmu-49418454  
UUGGCAAGUCUGUUGGAUCAGGUUGACUGU

>piR-mmu-164390  
UAUGCUAGAGAACAGGACACAGAAGG

>piR-mmu-78774  
AAAACAAUGAGGAGAUGGGUACUGUGGGA

>piR-mmu-1925374  
UAGGGAUGAAGCGGUCUGGGUGGUGUCU

>piR-mmu-44586  
UGGGAUGUAAUAUUGAGUGAGUUGAUCUG

>piR-mmu-78913  
UGCAGGCAGAACAUCUACACAUGAAAUA  
>piR-mmu-100208  
UGUGCAGGACACAGAAGAGCUUAUGGUUAU  
>piR-mmu-73043  
UAACAUUGUAGACAGGCACAAAGAUCCCCUU  
>piR-mmu-75186  
UAGAAGCUGUACUUGUCAGGGAGAGGACUC  
>piR-mmu-48946924  
UAAAAGAGGGCAUUCGGUAGUUGGGCAGU  
>piR-mmu-74396  
UAGAGCAUUGUGAAUGAACUAAGAGGCUAC  
>piR-mmu-74956  
UAGAGACACCAAUGAACCAGAUCUGCUA  
>piR-mmu-26697  
UGGGCAAAACAUGUGCAGUUGAUUCUAGCU  
>piR-mmu-81499  
UCAGAGAAAUAAGUAGAAAGAGUGACUGG  
>piR-mmu-85363  
UUGGUGAUGUAGAAAACCUCUGUGAAGAUGU  
>piR-mmu-49462546  
UAGUUCUUUGUCUAAGGCUGAAGACUUAGU  
>piR-mmu-924770  
UCUUUGUGAUGGUCAGGCAAGGUGAAGGGG  
>piR-mmu-150913  
UAAUGCUGGUAUUCUGAGCACCCGGUAC  
>piR-mmu-34658  
UAUAAAUUGCAGGAGAAUCGUAGAUGUGG  
>piR-mmu-73759  
UCUAAAAGGAAGGAAUGAUACUGGUAUG  
>piR-mmu-3600  
UAAAAGGAAACACACGGACGAGGAGAUGGC  
>piR-mmu-164941  
UCCAGAUAGAAACUGGAUCGGAGUUGGGG  
>piR-mmu-85257  
UCGGACCAGAGAAGGAGAACAGAAAUGGCC  
>piR-mmu-80618  
UCAGAGGCAAAGAGAACAAGCAAGAGCAAC  
>piR-mmu-48984205  
UGCUUUUGUCUAGAGGUAGAGAGAUGUGGU  
>piR-mmu-77990  
UUUGAUAAAGUAGAAUAGCACUCCCAGA  
>piR-mmu-80024  
UCUUGAUAGUAGAAAUGUCCUAAGCAGC

>piR-mmu-80143  
UCCUCGAGUCUAAGGACUUAGUAUAGUAGA  
>piR-mmu-109173  
UUAUCCCGUAGACUCUGGUGAACAGCUGGGC  
>piR-mmu-21090  
UAAGAUGGAGUCUAUUAGGCAGAACACAGU  
>piR-mmu-38078  
UAAAAGAUAGAACUCUUCACACGAGGUGCUG  
>piR-mmu-75807  
AGUAGGGUUUUGUAGCUCAAACUAAUCGGCGU  
>piR-mmu-77727  
UCUCUGGAUGGUAGAGGCGUGCUUUGCAUU  
>piR-mmu-15544  
UGCACUGUAGGAUGCAAUGGGAUUUGGAAU  
>piR-mmu-73352  
UACUCUCUGACAGAUGUGAAGAACAGGUU  
>piR-mmu-77447  
UGAGACUCUUGGACAACAAGUUUCAAAAUGGU  
>piR-mmu-49336197  
UUCUAGACAGGACAGGAGGCGACCACUCCAU  
>piR-mmu-81739  
AUGUCUCUCUUCUCUGUAGAUUCAAGUAGGC  
>piR-mmu-76962  
UGAAACGAGACUUAAGAGGCUUCAGGGAGGG  
>piR-mmu-77408  
UUCAGUACUGACAGCAAGGACACGAAGGGA  
>piR-mmu-14139  
UGAUUUGGUUGACUCUGUUAUGGAGAUGGU  
>piR-mmu-76062  
UCAAUGCUGUGGUUAUGGCAUACAUCUUU  
>piR-mmu-116925  
UCUAAGCACAGAUCCAAGAUCAGGGGAGGC  
>piR-mmu-86979  
AGCUUCAAUAGUAGAUGGCAGGAUCCUGA  
>piR-mmu-94137  
UACAAGCUGUGGGCAUCAACUGUCUCGAU  
>piR-mmu-74097  
UGGACAGAAGAAUCCCUAGGGAGGCAGGGC  
>piR-mmu-48867504  
UGGGAUUGCUGGCCAAGCACAUAGAACUGU  
>piR-mmu-9913  
UAAGGAUUCUGGGAAAUGUAGUUGGC  
>piR-mmu-73233  
UUAUUGUAGUAGCACAGAGGACUGACCUGG

>piR-mmu-42729  
UUAUUUACCUUUUUGAGUGCUUGUGACUGU  
>piR-mmu-13001  
UAGGAAUGGUCAAAACUUGACCUGGGCUGU  
>piR-mmu-107021  
UCUGUGUUGGCUGCAUCAAUCCCUCUGGGGAAC  
>piR-mmu-74879  
UAAAAUAAGUGCUGGUGGUAGAAAGGAG  
>piR-mmu-68407  
UCUGAGGGAUUGAUGGUACCAUAGGCAGU  
>piR-mmu-62309  
UAGAAUCUGAAAAGCCCAAGAAUGGUGAACA  
>piR-mmu-78240  
UACAGAAUCAUUGGAAAGGGUAGGAGGCA  
>piR-mmu-71956  
UGCAAAGACCCUCGGAUGGGAGAAGGGUGU  
>piR-mmu-41234  
UGGGAUGGUAAUUGGAGUUACAUGUGUGA  
>piR-mmu-50554157  
UAGGGAUGGGAAGUUCUUCAGAAAGGGACAGU  
>piR-mmu-73102  
UUUGACAUUAGAACAUUUGCCGAAUGGGUU  
>piR-mmu-50876664  
UGACUUUUUCUCUGGGGUUAGAAGGGCCAU  
>piR-mmu-49774584  
UGGAGAAAAGGCUAAGACUACUGGGACUGU  
>piR-mmu-74321  
UGGACUUUUUCUAAAAUUUGCUGAGAGGGU  
>piR-mmu-83137  
UUUACAAGACUGAGUGGGUAAGAUGGAGGA  
>piR-mmu-1216006  
UGCUUUUAACACAGCACUGAGGAGGU  
>piR-mmu-165607  
UCUUUUUAUCAGGGUUAGAGAUCUUAAGGG  
>piR-mmu-20366  
UAGGAUUCUGCAGACGGAAUACACAUCUU  
>piR-mmu-76301  
UAUCCUCUGAAUGAGAUGGCCAGGACUUC  
>piR-mmu-74502  
UGAAAGUUGUAGAAUGUGGCAGAGCCGGA  
>piR-mmu-3220  
UGGAAGAAGGACCUGCAUAGUGAAAGUGAC  
>piR-mmu-73108  
UGUUUCCAUAUUCAGAGCUGAAGGACACA

>piR-mmu-77006  
UGUAUGAUUGAAAUGCUAGUGAGUGGAGAC  
>piR-mmu-944825  
UGAGGAAUACACUCUCUGCUGGCAUG  
>piR-mmu-10646352  
UGAGCAAGGAACAAGGAGCUAGGG  
>piR-mmu-80305  
UCAGCUGCAAGAAGACACUGUUACACAGU  
>piR-mmu-73126  
UGAAUUAACUCUUGCUUGCACACGGACAA  
>piR-mmu-50895815  
UGCAUUUAUCAGUAAGAAGGGAGGGCUGU  
>piR-mmu-74707  
UGUUUAAAUAUUUAUGGACAUGGAAGAAUGC  
>piR-mmu-73841  
UGUAUAAA AUGGACCAGGUGUGAGCAGUG  
>piR-mmu-78095  
UUGGAACCCAUGUUGGAAACAGAGGACAGG  
>piR-mmu-81405  
UAGAUUGUUGGUAGGUUUGGGGAAGGAUC  
>piR-mmu-80201  
UCCAGGCAUGAGCACCUGCUUCUGACAGCAUU  
>piR-mmu-49369804  
U AACUGAGAUGCUGAGACCAUGGAGUAGGU  
>piR-mmu-3250  
UGGAAGCAAUACUGAUACCGUAGACUUGA  
>piR-mmu-16794  
UGAAGCAAACGUAGUGGAACUGGCC  
>piR-mmu-83300  
UACUAAAUCCCAAGUAAGUAGAGGUGGCUU  
>piR-mmu-74881  
UGAAUAAAGCUGGAAGCAGAGAACAGACUC  
>piR-mmu-31015  
UACAAGAAUUGCUGAAAACUGUCUGAGGGU  
>piR-mmu-50457529  
UGCUGACUGCACACACCCUUGACUGAGCAU  
>piR-mmu-282968  
UGUAAGCUGCUCUGAAUUGCAGACUUGGCUGU  
>piR-mmu-91413  
UAGAGAUUGAGGACAUUAUGUAGCAGGGG  
>piR-mmu-77912  
UGAGAUUAGUGAUCCUUGGCCUUGCAAAGA  
>piR-mmu-37656  
UGAGAUUAAAGGCAUGCACCAACACAAUUAU

>piR-mmu-86819  
UAUUCCAGAGAAGUAGAAUGGUGUAUAUC  
>piR-mmu-76972  
UAACAAUGGGAACUAUAAGUGGGGAAGAA  
>piR-mmu-27457  
UAGCUUAUAACUCUGAAUCUAUAUGGCUC  
>piR-mmu-105741  
UGACUCCAGAGGAUUUGCAACAACACAC  
>piR-mmu-92770  
UGAAUGAAUGAAUGAAUGAAUGGGGGUGU  
>piR-mmu-73822  
UAAGGAAUAUGUGACAGCAUAAGAGAUGCGU  
>piR-mmu-80955  
UCCAUGAACUCGGCAUAUUCUCAGCUCUC  
>piR-mmu-76902  
UAGCAAACACCAAUACGACUCAGCAGCUGU  
>piR-mmu-59217  
UAGCAGAAGUUAGGGACAGAUAGAUGG  
>piR-mmu-26448  
UUCAAAGGCAAUUGCUUUGGUUGACUGG  
>piR-mmu-74010  
UGGAAGCAAAGGAAGACACUCUGAGUCUAU  
>piR-mmu-76926  
UCAAGUUCUUUAUAGAUCUGAAUUGGAUUG  
>piR-mmu-50950262  
UAAGAUUCGUAGGGCAUGGUACACGGUU  
>piR-mmu-74181  
UGCACAAGUAGCCUGAAGGGCUUUCUCCCU  
>piR-mmu-58687  
UCUGAGAUGCAGUUGUGCCUGAUAGGAGG  
>piR-mmu-49208365  
UAGAUGCAGUAUGGAGACUAUGGUGGGAGU  
>piR-mmu-73229  
UAGGACUCACGAAGAGGCAUUAAGCUGCAGA  
>piR-mmu-73056  
UAGGACUCCAGAUACCAGAACAUAUUUGGCUU  
>piR-mmu-345193  
AUGAGAGGUGUAGAAUAAGUGGGAGGCCCCCGGC  
>piR-mmu-73338  
UAAGACAAAACUGGUAUGAAAUGGCUCUC  
>piR-mmu-272715  
UGAGAUACUCUGGGAAUGGUGCGCCUCUG  
>piR-mmu-73577  
UGAAAAUAGUAUGUUUGUAUGGAUCGGGGC

>piR-mmu-73225  
ACCAGGCACGAGAGCUUUGAGGAUUGCAUU  
>piR-mmu-634780  
UCUUGUCAUGGAUGUGAUUAGGAUGUUGGG  
>piR-mmu-21998  
UAGAACUUCUGACUGUUCCUCUUCGUUCCU  
>piR-mmu-190227  
UUGAGAACUGUGGGAGAGCAUCAGAGGCC  
>piR-mmu-124136  
UGUGAGAAACGAGCAGGCCCUUGGAACCG  
>piR-mmu-17210  
UGAUGAAGGAUUUAGAAGGAUACUAUAGA  
>piR-mmu-36936  
UGUAAUGUUGUAAAGAUGGUUUCUGUGGUA  
>piR-mmu-75930  
UAUCAUUUGACUGCUUGUUGGAUCUAUGGU  
>piR-mmu-91860  
UCUGAACUGAACAGACCGAAGAGAUGUGC  
>piR-mmu-73884  
UUGUAGAAACGAUUCAUCAAACAGGCUU  
>piR-mmu-33738  
UAGAAAUGUCUAAGCAGACCUGACAGUCCA  
>piR-mmu-52855072  
UUGUAGAAUGGAUGCAGGCCUCACCCGGU  
>piR-mmu-5379878  
UGGACAGAGAGAGUGGCUUUGCUUCC  
>piR-mmu-58801  
UGGGCAUUGUAGAGACAUGGCAGGUUCUA  
>piR-mmu-48981244  
UAGGAUGAGGAUGAAUGUCAGUUGCAAGGU  
>piR-mmu-52473546  
UAAGCUGUGAAUGACUGUGCUGGGGGAGGU  
>piR-mmu-267827  
UCUGUUAGAACUGUUGCUAGAGGUAGGGG  
>piR-mmu-74469  
UGCUCUGAGUAGUUCUGCUGUAGGAAAAGGC  
>piR-mmu-77838  
UAUUUUCUGAGCAUUUUGGCAACACCAU  
>piR-mmu-623433  
UUGCUGGGGAAGACUUUUGAAGAUGAGAGG  
>piR-mmu-96112  
UGAGACCAAUGACUGCAUACAGAGAGGUGC  
>piR-mmu-74822  
UUUGAGACAAGUUGUUUGCAGAUUUUA



>piR-mmu-96195  
UGGGACUCUUUGGAGCUGCAGGCUGUAA  
>piR-mmu-73202  
UGGAACUUGGGAAGACUCAUAACUGUCCAUUC  
>piR-mmu-74222  
UGGAAUUGUAGUUAGGAGCCAUUGAUGGGU  
>piR-mmu-83773  
AUGGAUGGAUGGAUGGAUGGUUUUUUAUGU  
>piR-mmu-73452  
UGGGAUGGAUGGCAUGCCAUUGUGUACUCU  
>piR-mmu-109833  
UAAAUUUAAAGUAUGGGCAUUGAGGGGAGGA  
>piR-mmu-49019670  
UAAAACUGUAUUUGAAUUUGGGGCGAGCAU  
>piR-mmu-78034  
UAGGGACUGACUAGAAAGAAAGGUCAAGGA  
>piR-mmu-25233  
UGAUGACGUGUAUGGUCUUUGACAGAUGGC  
>piR-mmu-75330  
UGGAGUUACAGAUCGUUGUGAGCUGGCAUA  
>piR-mmu-50797023  
UGGAGUUACAGGCAGCCAUGAGUCACUCAAU  
>piR-mmu-44433  
UGAUUAGAUGAAUAUGGUGAUGUGGCUGA  
>piR-mmu-77276  
UAGGAAACAAGGGAAGGGAUGUUCACAGA  
>piR-mmu-22943  
UUCUAAGGGCGUCGGAAUGCUCCAUCGGC  
>piR-mmu-119189  
UACAGUCACAAACAGGAUGUAGGGAAGGGA  
>piR-mmu-75526  
UAGAGUUAGAGGUAGAAGUGUAUAGUGCAG  
>piR-mmu-250470  
UAACUGAAGAGAUGGGCAGAGAUGGGGUUA  
>piR-mmu-98421  
UGUUUAACUGGGCGGAAGUUUAACUGGGA  
>piR-mmu-114660  
UGAGAAAUGGGAGAGUAUAAGAGCAGAGA  
>piR-mmu-56727  
UACAAGAAGCUUGGAUCUGAGGUGUGCAU  
>piR-mmu-73778  
UAGGAUUUUUUUUUAGUCUGGUCUAGGAUA  
>piR-mmu-119529  
UAUAAAGGUUUAGUAUCAUGGGGUGGAUGG

>piR-mmu-25581  
 UGAUUUUUGAUUUUCUAGCUACGGUUUGCCC  
 >piR-mmu-50661917  
 UUAAAGGAAUUUAGAAAUGGGUCUAAAUGU  
 >piR-mmu-44534  
 UCAGAAGAGAUUCAGGAUCGUUAGAGAGG  
 >piR-mmu-39773  
 UAGUGAGGUCACUCUUAGUUGGAUGGUAUG  
 >piR-mmu-77593  
 UCUCAGAAAUUGGCAUGACUCCCUUGGG  
 >piR-mmu-74686  
 UUGGAUUCUGCCCCUUGACUGAAGCUGCUU  
 >piR-mmu-47120  
 UGCAGAAGCAAAGAACAACAGAUGACA  
 >piR-mmu-52772  
 UAGGACACGAAGUCUUGGAUCCGUGUGG  
 >piR-mmu-7662  
 UGGUCUGAUUGCUCUCUUAUAUUCGGUGU

(2) List of 709 samples in  $S_{\text{non-inst}}^+$

>mmu\_piR\_038638 | gb | piRNA\_1683 | Mus\_musculus:17:27060780:2706080  
 3:Plus  
 UGAGCUCUUGGGGAAACUGCGUUC  
 >mmu\_piR\_035721 | gb | DQ723674 | Mus\_musculus:17:27017943:27017967:  
 Minus  
 UUUUCACCAUGUGACCUGCCGCCGC  
 >mmu\_piR\_024983 | gb | DQ708095 | Mus\_musculus:19:41916189:41916213:  
 Minus  
 UGUAAGAUCUGCUCUAACCAGGCGU  
 >mmu\_piR\_008186 | gb | DQ566528 | Mus\_musculus:5:113581936:113581960  
 :Plus  
 UAGCUCCGUGGCUGUGGUCCCCUGC  
 >mmu\_piR\_020492 | gb | DQ701563 | Mus\_musculus:11:108827972:10882799  
 7:Minus  
 UCCAGUGCGGUAACGCGACCGAUCCC  
 >mmu\_piR\_026880 | gb | DQ710852 | Mus\_musculus:15:74465061:74465086:  
 Plus  
 UAGCAGAACUUUACAAGAGUUACUG  
 >mmu\_piR\_017463 | gb | DQ697083 | Mus\_musculus:12:103806287:10380631  
 2:Plus  
 UGGAAGGACUGAGGACAGGUUUCGCA  
 >mmu\_piR\_039864 | gb | piRNA\_755 | Mus\_musculus:15:59084403:59084428  
 :Minus  
 UAGUACAACGGCUGGGCAAGCCAAUG

>mmu\_piR\_002245 | gb | DQ545834 | Mus\_musculus:4:61711897:61711922:Minus  
UGAAGGUCCUCUCUCUGUUCUCGGC

>mmu\_piR\_034702 | gb | DQ722160 | Mus\_musculus:14:43699754:43699779:Minus  
UGGCAGCUCACACACUACUGCCCUUA

>mmu\_piR\_017163 | gb | DQ696640 | Mus\_musculus:9:54051184:54051209:Plus  
GGAAAAUUCUCAGAUGUCCAAUGUU

>mmu\_piR\_002077 | gb | DQ545212 | Mus\_musculus:7:125121256:125121281:Minus  
UGAAAGGAUCGGGUGAUAGCAGGCAA

>mmu\_piR\_033819 | gb | DQ720896 | Mus\_musculus:15:74466623:74466648:Plus  
UACUUGUCUUACAGGCAUCCCAAGC

>mmu\_piR\_012332 | gb | DQ689436 | Mus\_musculus:9:67503628:67503653:Minus  
UUAGAGCAGCUGCUUCCAAGUGUCU

>mmu\_piR\_035164 | gb | DQ722847 | Mus\_musculus:18:67163240:67163265:Minus  
UGUGAGAGGCUUGUCAGUUUCAUUGA

>mmu\_piR\_015845 | gb | DQ694703 | Mus\_musculus:4:93820631:93820657:Minus  
UGUCAACUAUUCUAGUGGUCAUUAUGC

>mmu\_piR\_014725 | gb | DQ693036 | Mus\_musculus:8:96304260:96304286:Minus  
UGCCAAGAUGUAACUGACAUGCACUC

>mmu\_piR\_022245 | gb | DQ704137 | Mus\_musculus:6:127763798:127763824:Plus  
GGGUCUGAUUUCUGAAGUAAGGAAGGC

>mmu\_piR\_002647 | gb | DQ547188 | Mus\_musculus:7:69791191:69791217:Plus  
UGAGAGUAAUGAGGUCGGAAAGAAGGG

>mmu\_piR\_036648 | gb | DQ725002 | Mus\_musculus:6:83551753:83551779:Plus  
UGUCAUAGCACACCUCAAUGAAGCCCC

>mmu\_piR\_016994 | gb | DQ696390 | Mus\_musculus:17:27084753:27084779:Plus  
UAGUCAUCUAUAGUCCUAAUGCCCCC

>mmu\_piR\_033637 | gb | DQ720623 | Mus\_musculus:14:64514342:64514369:Minus  
UGGUUAUCCGUGGAACUGGUCUGUAUGA

>mmu\_piR\_008641 | gb | DQ568060 | Mus\_musculus:7:72989901:72989928:Plus

UAUCCAGAGCAUGAGGAGUACUUGUGAU  
>mmu\_piR\_008191|gb|DQ566544|Mus\_musculus:6:127772753:127772780  
:Plus  
UAGCUGUGACCAGGUCAAGUCUCUUGGA  
>mmu\_piR\_035927|gb|DQ723972|Mus\_musculus:6:85077807:85077834:M  
inus  
UAGGAUUUCCAGGGCACAGCAGGGCAGC  
>mmu\_piR\_024230|gb|DQ707033|Mus\_musculus:15:59079750:59079777:  
Minus  
UGGGAGUUCAUUAAGAGCAGGAAGCAGU  
>mmu\_piR\_015927|gb|DQ694825|Mus\_musculus:14:18424089:18424116:  
Minus  
UGCAAAGCGACGGUGCAAGGUUUCAGCC  
>mmu\_piR\_027081|gb|DQ711137|Mus\_musculus:6:127795620:127795647  
:Plus  
UCCAGAUAAAGAUUGGAGACUCCCAACUA  
>mmu\_piR\_028590|gb|DQ713311|Mus\_musculus:6:81864675:81864702:M  
inus  
UGCAGAGAGAAAAGAAAAAGUUUUAGGC  
>mmu\_piR\_030470|gb|DQ716012|Mus\_musculus:17:26685713:26685740:  
Plus  
GACCCCAUCAAGUGCACAGCGUCCAGUC  
>mmu\_piR\_021675|gb|DQ703258|Mus\_musculus:7:73655357:73655384:M  
inus  
UAACACAUGCCAAGACAAGGAUAAAACC  
>mmu\_piR\_006302|gb|DQ560847|Mus\_musculus:9:67511756:67511783:M  
inus  
UUAGGUUGUUUGGGGAUUCUGAGCAGUG  
>mmu\_piR\_003483|gb|DQ549999|Mus\_musculus:12:98802042:98802069:  
Minus  
UGCCAGUUGUCCAAGACUCUUAAGCCU  
>mmu\_piR\_037903|gb|DQ726799|Mus\_musculus:5:113570499:113570526  
:Minus  
UAAAGGCACAAACCAUCACACCUGGACC  
>mmu\_piR\_023174|gb|DQ705461|Mus\_musculus:5:144021994:144022021  
:Plus  
UCCUGGAAGCAAAGGUUCGAGACCAUUC  
>mmu\_piR\_012039|gb|DQ688975|Mus\_musculus:4:134900057:134900084  
:Plus  
AAAUUGAGUACCGGCUGGUCCAAGAGUG  
>mmu\_piR\_010676|gb|DQ686886|Mus\_musculus:15:59118049:59118076:  
Plus  
UGAUGUCCUCUCAGAUGAAACUGAUUUC  
>mmu\_piR\_038485|gb|piRNA\_1378|Mus\_musculus:17:27065935:2706596

2:Plus

UGGGGGAAGUGUUACAUCCAGAAGAGAC

>mmu\_piR\_021957|gb|DQ703685|Mus\_musculus:7:69791068:69791095:Plus

UGAAAUCUGUUAAAACUGUUUGAGAGAA

>mmu\_piR\_032176|gb|DQ718419|Mus\_musculus:17:27044790:27044817:Minus

AGCCUCUCGUGAAGCCUUGUUUGGCCUC

>mmu\_piR\_016377|gb|DQ695487|Mus\_musculus:18:67181743:67181770:Minus

UGGGUUUCUUUAAUGGUGUAUUGGCCA

>mmu\_piR\_022652|gb|DQ704728|Mus\_musculus:1:158477817:158477844:Plus

UGAAAAAGAGGAACGCCCCACGCCCC

>mmu\_piR\_008231|gb|DQ566702|Mus\_musculus:7:69786798:69786825:Plus

UAGGACAGGUAGGUGAUGGCAAUAUGA

>mmu\_piR\_006760|gb|DQ561908|Mus\_musculus:2:92370538:92370565:Plus

UUGCCUUCUGUGGGUUUUAUAGAGAGAU

>mmu\_piR\_028086|gb|DQ712600|Mus\_musculus:7:69806428:69806455:Plus

UAGAAGCUGUAAGAAGCUCAGACAGUGC

>mmu\_piR\_001287|gb|DQ542941|Mus\_musculus:10:75302525:75302552:Plus

UCCGCCUUCAUGAAUUCUCAGGGACCUG

>mmu\_piR\_037786|gb|DQ726627|Mus\_musculus:17:26668031:26668058:Minus

GAAA AUGCAGAAGCCUAACAGGAGCCAC

>mmu\_piR\_013278|gb|DQ690878|Mus\_musculus:4:42010308:42010335:Minus

UCCAAGCAUUUGACGGGUGACGCUGAA

>mmu\_piR\_003071|gb|DQ548545|Mus\_musculus:15:59108132:59108159:Plus

UGAUUGGUGAUGAGGAUAUGGAGAUGCA

>mmu\_piR\_024094|gb|DQ706835|Mus\_musculus:9:67540563:67540590:Plus

UAUGUUUACCUCACCAACUACACUUGGA

>mmu\_piR\_029069|gb|DQ714015|Mus\_musculus:14:43700806:43700833:Minus

UAUCUAAAGUCUCUUAUCUCCUGGUGCA

>mmu\_piR\_033562|gb|DQ720512|Mus\_musculus:10:62073759:62073787:Plus

UAAUUCGACUUGCUCUGGGUCUCAAGCC

>mmu\_piR\_025255|gb|DQ708494|Mus\_musculus:9:67498289:67498317:Minus  
UAACCCAACUGAAUUUCCUGCCAAGGCUC

>mmu\_piR\_032968|gb|DQ719586|Mus\_musculus:15:59097466:59097494:Minus  
CUCUCAAAACUUAAGGAUACGUGUAGCUAG

>mmu\_piR\_007304|gb|DQ563476|Mus\_musculus:4:42008088:42008116:Minus  
UAAGGGUGACUUGGAUCAGGCAUGUCUGC

>mmu\_piR\_001940|gb|DQ544764|Mus\_musculus:15:83186573:83186601:Minus  
UCUUCAGGCAAAUGUAAGCUACAGGACCA

>mmu\_piR\_001405|gb|DQ543306|Mus\_musculus:18:67160770:67160798:Minus  
UCCUCUUCAAGAAGAAGUGUCUGUGCUGG

>mmu\_piR\_017520|gb|DQ697167|Mus\_musculus:5:22938598:22938626:Minus  
UAAGAGCAAAUGAGAGUGAAAAGAAUUGA

>mmu\_piR\_003281|gb|DQ549345|Mus\_musculus:2:92342265:92342293:Plus  
UGCAGUGC AAAUGUAUUGGUAGGCCAAAU

>mmu\_piR\_003807|gb|DQ550872|Mus\_musculus:1:93234015:93234043:Minus  
UGC UACCCUAGUGUGUCACUUUUUAAAC

>mmu\_piR\_002542|gb|DQ546847|Mus\_musculus:11:103256160:103256188:Plus  
UGACUUGCAGGGGCCAGUUCUCUCCAGUU

>mmu\_piR\_027016|gb|DQ711034|Mus\_musculus:11:53828745:53828773:Plus  
UGGGAUUUAUAGAUGAAAUACUGGAUCAUA

>mmu\_piR\_003240|gb|DQ549233|Mus\_musculus:10:66092826:66092854:Minus  
UGCAGAUCAUUUUGCCCGGCUCUCUACUU

>mmu\_piR\_036781|gb|DQ725178|Mus\_musculus:11:50786956:50786984:Minus  
UGAAGUAUCCAUCUGAGGUUUUUUUCUC

>mmu\_piR\_016454|gb|DQ695612|Mus\_musculus:10:66089900:66089928:Minus  
UGUAGCCAAAAUGCUUCUAUUUAUAGUCAG

>mmu\_piR\_016027|gb|DQ694973|Mus\_musculus:9:67550119:67550147:Plus  
UGGCAUAACUUACACACUGUUCUACUAUC

>mmu\_piR\_000889|gb|DQ541681|Mus\_musculus:6:38541813:38541841:Plus

GCUUACAAGACAAGGUUUUAGUUGUGUCC  
>mmu\_piR\_003186|gb|DQ549058|Mus\_musculus:5:150061989:150062017  
:Minus  
UGCACACACACAUCCCCUCAGUAUGGCC  
>mmu\_piR\_006973|gb|DQ562424|Mus\_musculus:13:50383178:50383206:  
Plus  
UUGUGUGUGGCCCCCUUGAACAAGUUGCC  
>mmu\_piR\_036126|gb|DQ724261|Mus\_musculus:5:113564531:113564559  
:Minus  
UGACCCUGGUGACUGAAGCGAAGUUUCCC  
>mmu\_piR\_029809|gb|DQ715058|Mus\_musculus:10:75302451:75302479:  
Plus  
UACCAAUUCUAAAUUGAGCUGGGCCUU  
>mmu\_piR\_008762|gb|DQ568393|Mus\_musculus:7:69813817:69813845:P  
lus  
UAUGGUACAGUUGUGUGCCUGGAUCUUC  
>mmu\_piR\_012370|gb|DQ689493|Mus\_musculus:15:83185395:83185423:  
Minus  
UGAGUCUUAAGUUACAGGCACAAAGCUGC  
>mmu\_piR\_008612|gb|DQ567993|Mus\_musculus:5:150070620:150070648  
:Minus  
UAUCAGGGCUCUCGAAUUUAUCCAUCUC  
>mmu\_piR\_005889|gb|DQ557721|Mus\_musculus:15:59088346:59088374:  
Minus  
UGUGCCCAAACCAACAAUUGGAGAUAGAC  
>mmu\_piR\_003459|gb|DQ549929|Mus\_musculus:1:93235482:93235510:M  
inus  
UGCCAGCACUCGACCCUUGCUCUUUCUC  
>mmu\_piR\_002997|gb|DQ548299|Mus\_musculus:8:28762248:28762276:M  
inus  
UGAUGAUGUCACGAGUAAGCAAGUGUUGC  
>mmu\_piR\_010785|gb|DQ687061|Mus\_musculus:10:85282150:85282178:  
Minus  
UGAGAUGUGACCCAGGUUCUAGACUGUC  
>mmu\_piR\_029011|gb|DQ713927|Mus\_musculus:6:87959346:87959374:M  
inus  
UGGGAGAUUAGUGUUAAGCUGAAAUCACA  
>mmu\_piR\_000980|gb|DQ541932|Mus\_musculus:1:93235333:93235361:M  
inus  
UCCAACCAGGCCUGAACCCUCUGCAUGAA  
>mmu\_piR\_005323|gb|DQ555792|Mus\_musculus:4:61712243:61712271:M  
inus  
UGGUCUGGUAUUGUGUUCUACCCGGGAA  
>mmu\_piR\_018160|gb|DQ698110|Mus\_musculus:2:100018470:100018498

:Minus  
UACCUUUGAUGAGUAUGAAGUGCCCCUCC  
>mmu\_piR\_012952|gb|DQ690408|Mus\_musculus:2:92381685:92381713:Plus  
UGGAAUUAUCAGAGCUGAUAAAUGUAUG  
>mmu\_piR\_002592|gb|DQ547023|Mus\_musculus:9:54038527:54038555:Minus  
UGAGAAUGCAGGGUGUUUCUGAUGGAUGA  
>mmu\_piR\_021284|gb|DQ702692|Mus\_musculus:5:150097948:150097976  
:Minus  
UAGCAGGUAAUUCGUUUCACUGAGUGAGUA  
>mmu\_piR\_022665|gb|DQ704745|Mus\_musculus:17:66121630:66121658:Plus  
UGGGCUUUGGUGCAUCUGUCUUUGAGUCA  
>mmu\_piR\_003266|gb|DQ549290|Mus\_musculus:6:85480601:85480629:Plus  
UGCAGGGAACCGGGUGCUUCUGGGAUUAA  
>mmu\_piR\_002567|gb|DQ546929|Mus\_musculus:5:150066499:150066527  
:Minus  
UGAGAAAUUUGCUGUGCUGAGAAAUUUGC  
>mmu\_piR\_012552|gb|DQ689773|Mus\_musculus:4:41974663:41974691:Plus  
UUACAUAUAGCUACUUCUUGGCCACCCUC  
>mmu\_piR\_035862|gb|DQ723881|Mus\_musculus:12:98811782:98811810:Minus  
UCCUUUAAGAGUUUCUAGCAUAUCCCAGA  
>mmu\_piR\_011672|gb|DQ688408|Mus\_musculus:1:94827212:94827240:Minus  
UCCUGUAUUAUGGAACAGGCUUCCUCAUA  
>mmu\_piR\_001214|gb|DQ542719|Mus\_musculus:5:144014306:144014334  
:Plus  
UCCCGAGAGCCUGCUGUAAAACGCCAGC  
>mmu\_piR\_008974|gb|DQ569007|Mus\_musculus:15:74483044:74483072:Plus  
UCAAUAAAGGAGUGUGACCUGGAAGUUGU  
>mmu\_piR\_025353|gb|DQ708629|Mus\_musculus:10:62071719:62071747:Plus  
UGGCUUCAUUGUUUAUACGUGGUCAAGGA  
>mmu\_piR\_026791|gb|DQ710733|Mus\_musculus:7:73664218:73664246:Minus  
UGACCCAACGUCUAUUUUUUUCCAGGACA  
>mmu\_piR\_022206|gb|DQ704071|Mus\_musculus:18:67183736:67183764:Minus  
UGAGAGGGUUAUAUGACUGCACCCUAAGC



>mmu\_piR\_038073|gb|DQ727054|Mus\_musculus:10:66093207:66093235:  
Minus  
UCCACUUAAGACAGUCAGUUAUUAUUCAA  
>mmu\_piR\_025680|gb|DQ709108|Mus\_musculus:15:78484129:78484157:  
Minus  
UGC AAAUAAAAGAUUGCCAUCAGUGAC  
>mmu\_piR\_002760|gb|DQ547606|Mus\_musculus:5:150093161:150093189  
:Minus  
UGAGGGAUUGAUGGUACCAUAGGCAGUGU  
>mmu\_piR\_029164|gb|DQ714157|Mus\_musculus:10:75286822:75286850:  
Plus  
GCCUUUCAUGACAUGUUUCUCUAGAUGCU  
>mmu\_piR\_028003|gb|DQ712467|Mus\_musculus:5:113578266:113578294  
:Minus  
UUCAAAGGUGUGUGUUUCAAACAAGCA  
>mmu\_piR\_027928|gb|DQ712357|Mus\_musculus:6:128412894:128412922  
:Plus  
UGC UAAGAGCAGUGAAUGUCUACACUAGA  
>mmu\_piR\_015283|gb|DQ693860|Mus\_musculus:10:18489950:18489978:  
Minus  
UCACAGUGACUGACUCACCUGUGAGACGA  
>mmu\_piR\_008110|gb|DQ566267|Mus\_musculus:2:92368452:92368480:P  
lus  
UAGCAGGGCCUUUGCUGAUAAUCAUGAUG  
>mmu\_piR\_002906|gb|DQ548001|Mus\_musculus:14:22922977:22923005:  
Plus  
UGAUAAGUAGAGAAUCACAAGGUAGACCU  
>mmu\_piR\_003911|gb|DQ551169|Mus\_musculus:5:150050696:150050724  
:Minus  
UGCUGCGAUAAACACACACGUUUUGGAGG  
>mmu\_piR\_016309|gb|DQ695385|Mus\_musculus:5:113588652:113588680  
:Plus  
UCCGAAGAGAACUUAUUUGGCCUCGCUUG  
>mmu\_piR\_001666|gb|DQ544121|Mus\_musculus:9:67534758:67534786:P  
lus  
UCUAGAGGUUGGAACCUGGGCUCAUGGUC  
>mmu\_piR\_033441|gb|DQ720331|Mus\_musculus:7:72986004:72986032:P  
lus  
UGCUGAUUUGUAAUAGAAGUUUACAAUGU  
>mmu\_piR\_031027|gb|DQ716796|Mus\_musculus:17:27057081:27057109:  
Plus  
UCAGAAGCUGGACUGUGUUAGACCACCUC  
>mmu\_piR\_004674|gb|DQ553767|Mus\_musculus:5:113579738:113579766  
:Minus

UGGCACCUAGGCUGACAUGAGGACAUGAA  
>mmu\_piR\_004642|gb|DQ553684|Mus\_musculus:18:67196550:67196578:  
Plus  
UGGCAACUCACAACUAUGAUUCCUGUUC  
>mmu\_piR\_019313|gb|DQ699820|Mus\_musculus:14:22952762:22952790:  
Plus  
UAAAAUUGAAACAUGUGUUUGAGGUUGCA  
>mmu\_piR\_025080|gb|DQ708242|Mus\_musculus:12:98801243:98801271:  
Minus  
UCAAAUAAGCAUGGUAAAAUGGUACCUGG  
>mmu\_piR\_008813|gb|DQ568563|Mus\_musculus:5:113588263:113588291  
:Plus  
UAUUCGGUUGUGCAGUCUUCCAAUAGC  
>mmu\_piR\_037329|gb|DQ725976|Mus\_musculus:2:150833004:150833032  
:Plus  
UGCACCAAAGCAAUGGACUCACCUGUUC  
>mmu\_piR\_004382|gb|DQ552720|Mus\_musculus:10:87711009:87711037:  
Minus  
UAACACAUGACUGGGUGCUCGGUAAUCUC  
>mmu\_piR\_003446|gb|DQ549868|Mus\_musculus:5:150076695:150076723  
:Minus  
UGCCACUUGACACUUCAAGGACCUCAUGA  
>mmu\_piR\_019479|gb|DQ700060|Mus\_musculus:14:22942469:22942497:  
Plus  
GUGGUCCUAGCUACUCAGGAAUCUGAGGC  
>mmu\_piR\_035105|gb|DQ722762|Mus\_musculus:17:27039226:27039254:  
Minus  
UGGCAGCUCAACUAAAGGAACUUGUCUUC  
>mmu\_piR\_004752|gb|DQ553977|Mus\_musculus:15:38242011:38242039:  
Minus  
UGGCCACUUCAAAUCUUUCUCCGAUGCUG  
>mmu\_piR\_029622|gb|DQ714803|Mus\_musculus:17:66052687:66052715:  
Minus  
UGCAGCAGGGCAUUGCUUUCUCCUUAUCA  
>mmu\_piR\_000792|gb|DQ541456|Mus\_musculus:14:109841558:10984158  
6:Minus  
GAGCAUGUGUCCUUGUUAUGUGUUGGAGC  
>mmu\_piR\_023210|gb|DQ705510|Mus\_musculus:6:127773266:127773294  
:Plus  
UCAUCUAUACACUGGAGUGGAGUGCUUUG  
>mmu\_piR\_010455|gb|DQ686543|Mus\_musculus:4:134899031:134899059  
:Plus  
UGACUAGAUAGGAUUUAAGGAUGGCUCCC  
>mmu\_piR\_031457|gb|DQ717395|Mus\_musculus:7:73014296:73014324:P

lus  
GUCUAGAUUUAGGGUCUGUGGUUAAGAU  
>mmu\_piR\_006204|gb|DQ558508|Mus\_musculus:3:35066557:35066585:P  
lus  
UGUUUUUCAGGCAGUGAAGAGUUAGAGGA  
>mmu\_piR\_019461|gb|DQ700033|Mus\_musculus:8:96308531:96308559:M  
inus  
UGGCAGAUUGUUUGUCUUGAAUGGUGUU  
>mmu\_piR\_029707|gb|DQ714916|Mus\_musculus:9:67495435:67495463:M  
inus  
GAGUUUUUGUCAGUAUUCACCAGGAACUU  
>mmu\_piR\_006472|gb|DQ561203|Mus\_musculus:15:59116412:59116440:  
Plus  
UCCAAUUUGACUUUUGCCAUGGUGUUU  
>mmu\_piR\_013764|gb|DQ691625|Mus\_musculus:10:85169774:85169802:  
Minus  
GACAAGACAAGCUACAAAGACAAUGGAAA  
>mmu\_piR\_029623|gb|DQ714805|Mus\_musculus:9:67524534:67524562:M  
inus  
UCCUCUUAGGUAGAACUGGGUUCACUGGA  
>mmu\_piR\_000489|gb|DQ540675|Mus\_musculus:6:112586127:112586155  
:Minus  
CAUCCUCUUGACAGUUGCAAGCCUGCCGC  
>mmu\_piR\_012738|gb|DQ690053|Mus\_musculus:13:53408633:53408661:  
Plus  
UCCAAGCUCUUGGGAGAGAUGGCUGCUGA  
>mmu\_piR\_017287|gb|DQ696829|Mus\_musculus:5:113565203:113565231  
:Minus  
UGGUUGGUCAUCACAGGACACAAUACUGA  
>mmu\_piR\_005273|gb|DQ555678|Mus\_musculus:9:67510483:67510511:M  
inus  
UGGUAUGUGUGUUCAAUGAUGGAGUGUGU  
>mmu\_piR\_008793|gb|DQ568486|Mus\_musculus:10:60825000:60825028:  
Minus  
UAUUAAUGUGCGAAACUCAAUCACUGACC  
>mmu\_piR\_020867|gb|DQ702122|Mus\_musculus:11:103263136:10326316  
4:Plus  
UGUGAGUUUGAGACCAACCUGGUCUACAG  
>mmu\_piR\_009231|gb|DQ569731|Mus\_musculus:4:123343893:123343921  
:Minus  
UCAUCCUUCAGCGACUUGAGGUUGUAACA  
>mmu\_piR\_008374|gb|DQ567223|Mus\_musculus:4:52764059:52764087:P  
lus  
UAGGUGCUUCUCAGUCAUUCGGUAUUCUC

>mmu\_piR\_007844 | gb | DQ565336 | Mus\_musculus:14:22938639:22938667:  
Plus  
UACUGAGUCACCCCAGUUUGUCUUCUCGG  
>mmu\_piR\_002115 | gb | DQ545354 | Mus\_musculus:12:98810475:98810503:  
Minus  
UGAAAUGCAGGCUGCUUCCAUGAGUUUGG  
>mmu\_piR\_034678 | gb | DQ722129 | Mus\_musculus:5:113561725:113561753  
:Minus  
UACUUCAGGCCAGAUGAUGAGGUGUCCUC  
>mmu\_piR\_012183 | gb | DQ689217 | Mus\_musculus:9:54045031:54045059:M  
inus  
UAGAAGUAAAGCCUGUGAAGUAAGUGUGA  
>mmu\_piR\_037214 | gb | DQ725808 | Mus\_musculus:5:108070803:108070831  
:Plus  
UCCACAAGGAACUGAACGACCUGGCCCCAG  
>mmu\_piR\_028580 | gb | DQ713293 | Mus\_musculus:17:27057369:27057397:  
Plus  
UCUAGAUCAAUACCUUUCUUCUCAAUCUG  
>mmu\_piR\_032742 | gb | DQ719253 | Mus\_musculus:17:27074745:27074773:  
Plus  
UGGGGAUCUAUAUGCUUUGGGAGCUCGAU  
>mmu\_piR\_011643 | gb | DQ688366 | Mus\_musculus:14:43699090:43699118:  
Minus  
UACAUGAAGAAUUGGAGGGUAUUGUCAGA  
>mmu\_piR\_003231 | gb | DQ549213 | Mus\_musculus:18:67190854:67190882:  
Minus  
UGCAGAGCCUCAACAGAUUCUGUGGGAC  
>mmu\_piR\_034309 | gb | DQ721600 | Mus\_musculus:10:75281685:75281713:  
Plus  
UAGGAUUGAAGUCCGGCUCUGAAACGUGA  
>mmu\_piR\_011537 | gb | DQ688204 | Mus\_musculus:7:125119785:125119813  
:Minus  
UGC UUAGCUCAAGUAACAAUGAAAGGUAC  
>mmu\_piR\_011559 | gb | DQ688243 | Mus\_musculus:9:54044379:54044407:M  
inus  
GACAAAUGUCAAAAACCUUGGAUGAUCCU  
>mmu\_piR\_014629 | gb | DQ692899 | Mus\_musculus:5:150096408:150096436  
:Minus  
UCAGUUUAACAAGUGUAUCCCAAGGGUGU  
>mmu\_piR\_014638 | gb | DQ692908 | Mus\_musculus:6:128410420:128410448  
:Plus  
UCCAUGAGCCACACUGAUGCUGUCAGCA  
>mmu\_piR\_029139 | gb | DQ714117 | Mus\_musculus:10:127101216:12710124  
4:Plus

UGCACUGGAGGAAGUGUGUAAUGUGUGUA  
>mmu\_piR\_013134 | gb | DQ690673 | Mus\_musculus:5:113565406:113565434  
:Minus  
ACUCGGUCCUCUGCAAGAGCAGCCAGUG  
>mmu\_piR\_032237 | gb | DQ718508 | Mus\_musculus:6:120856298:120856326  
:Plus  
UACACUGUCUAGUGAAGAAAGAAGUUCUC  
>mmu\_piR\_004351 | gb | DQ552641 | Mus\_musculus:3:22717726:22717754:M  
inus  
UAAUGUCUCUGUGUGCUUCCUGUGCCCA  
>mmu\_piR\_031189 | gb | DQ717013 | Mus\_musculus:13:52134949:52134977:  
Plus  
UGAUGUUUAGUGGCUACCUGGAUGGCUGA  
>mmu\_piR\_027995 | gb | DQ712459 | Mus\_musculus:12:98823055:98823083:  
Plus  
UCAAUGGACAAGGGUCCUUUAGGUAGAC  
>mmu\_piR\_029813 | gb | DQ715063 | Mus\_musculus:2:150846240:150846268  
:Plus  
UACUUAUGUGGCCUAUGUUGUAAUGUCC  
>mmu\_piR\_029056 | gb | DQ713998 | Mus\_musculus:4:57453848:57453876:M  
inus  
UAUAUUUAUGAAUGAAUGUUGCAAAAUA  
>mmu\_piR\_029274 | gb | DQ714318 | Mus\_musculus:9:67512007:67512035:M  
inus  
UGGGCAAGUUUGGAGUAGCUCCCUAAUAA  
>mmu\_piR\_002441 | gb | DQ546563 | Mus\_musculus:2:92352348:92352376:P  
lus  
UGACCAGGCUAUAUGAAUUGACUUUCUCU  
>mmu\_piR\_003074 | gb | DQ548556 | Mus\_musculus:3:122010914:122010942  
:Plus  
UGAUUGUGGUAGGGCCUGACCAUGCCUGU  
>mmu\_piR\_015720 | gb | DQ694512 | Mus\_musculus:8:113012029:113012057  
:Plus  
UCAGCACUAUUGACAUUGGAACUGAAUUC  
>mmu\_piR\_034624 | gb | DQ722048 | Mus\_musculus:12:98789186:98789214:  
Minus  
UAAUCAAGAAAGGAAAUCAAGGUUUAGG  
>mmu\_piR\_001811 | gb | DQ544468 | Mus\_musculus:4:93780099:93780127:M  
inus  
UCUGAGGGUGAUAAUCUUGGAAAUCCUGC  
>mmu\_piR\_037215 | gb | DQ725809 | Mus\_musculus:12:98843673:98843701:  
Plus  
UCCUACAAAUUGGCAUCCUCAAUGCAUA  
>mmu\_piR\_015307 | gb | DQ693898 | Mus\_musculus:7:73019093:73019121:P

lus  
UGUGGCAACAGAACUCCUCCACAGGGUCC  
>mmu\_piR\_000190|gb|DQ539987|Mus\_musculus:18:50693193:50693221:  
Minus  
ACACGAAAAGCCACCCUGGUGCUGAGUUC  
>mmu\_piR\_012820|gb|DQ690187|Mus\_musculus:6:128410572:128410600  
:Plus  
UGGGUAAGCCUGUGACUUAGUCUUAUCA  
>mmu\_piR\_016601|gb|DQ695824|Mus\_musculus:18:67187891:67187919:  
Minus  
UCCCCAUGCGCAGUGGUGAAUGUGGCUUA  
>mmu\_piR\_017524|gb|DQ697174|Mus\_musculus:7:72991926:72991954:P  
lus  
UACAACCAACUCAUUGACUGUGUACCUGC  
>mmu\_piR\_002367|gb|DQ546270|Mus\_musculus:17:66133304:66133332:  
Plus  
UGACACUGGUGCCGGAUCUGCUGUGUGGU  
>mmu\_piR\_013222|gb|DQ690799|Mus\_musculus:18:35030721:35030749:  
Minus  
UAAGUCUCUAAAGGCCACUGUGGACUCAU  
>mmu\_piR\_030762|gb|DQ716411|Mus\_musculus:18:80291039:80291067:  
Minus  
UGCAAUGAACUCUUCCUGCCAAUGUCUA  
>mmu\_piR\_026764|gb|DQ710692|Mus\_musculus:14:23199432:23199460:  
Minus  
UCCAAAUAUUGCUGUAGGAGGGACCAAU  
>mmu\_piR\_009020|gb|DQ569162|Mus\_musculus:14:18435025:18435053:  
Minus  
UCACAGGACUCUUGUAGUGAAGUCUGCCC  
>mmu\_piR\_013723|gb|DQ691566|Mus\_musculus:18:67164811:67164839:  
Minus  
UAAUAACUUUCUUUGUUGAAAUGCUAGUA  
>mmu\_piR\_025924|gb|DQ709455|Mus\_musculus:5:144022542:144022570  
:Plus  
UAGGCUAGCUAGGUCAAGUGAUUUGGAUC  
>mmu\_piR\_007644|gb|DQ564625|Mus\_musculus:19:37321216:37321244:  
Minus  
UACAUGGGUGACAAGGAGGUCAGGUGUUA  
>mmu\_piR\_019767|gb|DQ700481|Mus\_musculus:2:92377491:92377519:P  
lus  
UUAGAUAGAUGGGAAAAGCUGCGGCUUGG  
>mmu\_piR\_001922|gb|DQ544723|Mus\_musculus:9:54020307:54020335:M  
inus  
UCUUAGAGAUGUUCUAUUGGAAGGUACCA

>mmu\_piR\_025041|gb|DQ708181|Mus\_musculus:10:45564052:45564080:  
Plus  
UGUACAGCAAGAUCUGUGUAAAUGGGGAC  
>mmu\_piR\_032950|gb|DQ719560|Mus\_musculus:7:69796203:69796231:P  
lus  
UCACAUUUCUUAGAUGUUCAAAGCUGG  
>mmu\_piR\_018449|gb|DQ698571|Mus\_musculus:10:18492158:18492186:  
Minus  
UCCUUGCCUUAUGCAUGUAUUGUAGGUAA  
>mmu\_piR\_021438|gb|DQ702912|Mus\_musculus:2:136761071:136761099  
:Plus  
UAGACGGGAUUUGAAUUGUUAAUGGCUA  
>mmu\_piR\_027437|gb|DQ711666|Mus\_musculus:2:150838977:150839005  
:Plus  
UGUUAGAGUCAGCUUUGGACACAUCCUG  
>mmu\_piR\_015743|gb|DQ694540|Mus\_musculus:5:150087156:150087184  
:Minus  
UGUUAUCACAAGACCUCUUGUCAGGCAGG  
>mmu\_piR\_018286|gb|DQ698315|Mus\_musculus:3:20654739:20654767:M  
inus  
UGGAAUAAUCAGGAAUUUUUGGUUUUGC  
>mmu\_piR\_016725|gb|DQ696004|Mus\_musculus:14:22940653:22940681:  
Plus  
GAACUUGGUUAGCUCUGCUCUUUCUUGUC  
>mmu\_piR\_009905|gb|DQ685674|Mus\_musculus:5:115101181:115101209  
:Minus  
UACUAAACUGCUUGUUUUCUGGUCUCACC  
>mmu\_piR\_006227|gb|DQ560657|Mus\_musculus:12:98799712:98799740:  
Minus  
UUAAAUAAGCCUUUGAGUCCUUAUUUCC  
>mmu\_piR\_013772|gb|DQ691634|Mus\_musculus:15:74469419:74469447:  
Plus  
UGCAUAGUGCUUACUGCAUGAGGCUGUGA  
>mmu\_piR\_028769|gb|DQ713561|Mus\_musculus:8:101010831:101010859  
:Plus  
GAUGUAAACGAAUGGAAUGAUUAAUAAUA  
>mmu\_piR\_004743|gb|DQ553962|Mus\_musculus:17:27068940:27068968:  
Plus  
UGGCCACCAUGACUUUUCGUUAGCUGCC  
>mmu\_piR\_010265|gb|DQ686220|Mus\_musculus:5:130438397:130438425  
:Plus  
UGCCAAGCUCAGUCCUGUAGGAUCAGAGU  
>mmu\_piR\_000542|gb|DQ540796|Mus\_musculus:17:66101832:66101860:  
Plus

CCCACAAGGAUGCUGCUCACUAAUUUGCC  
>mmu\_piR\_017031|gb|DQ696444|Mus\_musculus:17:66124489:66124517:  
Plus  
UACUACAUUCACAUGGACCACAGACAUAC  
>mmu\_piR\_000796|gb|DQ541462|Mus\_musculus:1:178711326:178711354  
:Plus  
GAGGAAAUUCAGAACCACGUUGCGUCUCA  
>mmu\_piR\_003350|gb|DQ549578|Mus\_musculus:15:59104610:59104638:  
Minus  
UGCCAAACCUCGUGACUGUAAAGAUGAUA  
>mmu\_piR\_004231|gb|DQ552219|Mus\_musculus:7:125121858:125121886  
:Minus  
UAAAAGUUCUAGACUGUGUCCUCCUGUG  
>mmu\_piR\_004968|gb|DQ554624|Mus\_musculus:7:73657459:73657487:M  
inus  
UGGGACAUACUGCCUGAUCUCCUGUGAGA  
>mmu\_piR\_003538|gb|DQ550176|Mus\_musculus:15:74471163:74471191:  
Plus  
UGCCAUUUUUUUUUCAAAAUAUCAAUC  
>mmu\_piR\_006789|gb|DQ561969|Mus\_musculus:10:127102341:12710236  
9:Plus  
UUGGAAUGCAUUGCUUCUAAUGGGUCUG  
>mmu\_piR\_000228|gb|DQ540089|Mus\_musculus:15:78492121:78492149:  
Minus  
ACUGACUCUGAUAGCCUGUCUUUGAUUCC  
>mmu\_piR\_031668|gb|DQ717700|Mus\_musculus:18:67179513:67179541:  
Minus  
UCACAAUCGUUCACAGUGGUCAAGACUUC  
>mmu\_piR\_012475|gb|DQ689648|Mus\_musculus:11:103244148:10324417  
6:Plus  
UCCUGAAGUAGAGUCCACUGAUCUUAGGC  
>mmu\_piR\_000893|gb|DQ541687|Mus\_musculus:5:144022066:144022094  
:Plus  
GCUUGCUUAACUUGCCUGAAGCCCUGGGU  
>mmu\_piR\_006012|gb|DQ558028|Mus\_musculus:10:101641614:10164164  
2:Minus  
UGUGUGUGCCCACUGAUGAAGCCCAUUGC  
>mmu\_piR\_008493|gb|DQ567634|Mus\_musculus:4:93785624:93785652:M  
inus  
UAGUUAAGGGCCUGUCUGAAUGUCAUAUA  
>mmu\_piR\_008730|gb|DQ568309|Mus\_musculus:11:27822412:27822440:  
Minus  
UAUGCAAGAAUUACAAUGGCCUAGGGAG  
>mmu\_piR\_009415|gb|DQ684864|Mus\_musculus:6:128155164:128155192



:Minus  
UGGGCUACAAGUGAGACUGUCUCAAAAAA  
>mmu\_piR\_035054|gb|DQ722681|Mus\_musculus:6:127777745:127777773  
:Plus  
ACCCACACAGUGGAAGGAGAGAACCUAUC  
>mmu\_piR\_020434|gb|DQ701486|Mus\_musculus:18:67175039:67175067:  
Minus  
UCCACCAUAGCUACCUGGAUCAGUGAUGG  
>mmu\_piR\_013244|gb|DQ690828|Mus\_musculus:18:67167253:67167281:  
Minus  
UACAGGCAUAUAAAAGUAUUAGGGCUCA  
>mmu\_piR\_002846|gb|DQ547834|Mus\_musculus:9:98095458:98095486:M  
inus  
UGAGUGCAGUGGGAUCGCUCUUGUGUUCA  
>mmu\_piR\_035159|gb|DQ722841|Mus\_musculus:15:59116480:59116508:  
Plus  
UCAAACGGCUUUGACGGUGAGUUCUCCAC  
>mmu\_piR\_031614|gb|DQ717624|Mus\_musculus:6:127781356:127781384  
:Plus  
UAAAACUAGCAGUAGUUGAUAAGGUGUUA  
>mmu\_piR\_022655|gb|DQ704731|Mus\_musculus:6:128152783:128152811  
:Minus  
UCUGCAUCUUUAGAAUAAUUGGAGUCAGU  
>mmu\_piR\_025528|gb|DQ708879|Mus\_musculus:8:96309997:96310025:M  
inus  
UAUGAGACUAACCUGUGCUAAACUGAAAA  
>mmu\_piR\_028301|gb|DQ712903|Mus\_musculus:14:18432251:18432279:  
Minus  
UCAUUUAUUUCUUGCCUUUAAACCAAAC  
>mmu\_piR\_012251|gb|DQ689324|Mus\_musculus:9:67506730:67506758:M  
inus  
UACAAACUGGGUGCUCCGUAGGGUUUCUA  
>mmu\_piR\_008141|gb|DQ566353|Mus\_musculus:6:87956582:87956610:M  
inus  
UAGCCAGUCUCUCAAGCCGGAGUCCCCUC  
>mmu\_piR\_005238|gb|DQ555576|Mus\_musculus:12:98803258:98803286:  
Minus  
UGGUAGAAGUAGGUAGCCACAUUGGUGAU  
>mmu\_piR\_006285|gb|DQ560809|Mus\_musculus:18:67170867:67170895:  
Minus  
UUAGAAGGGUGGGUUGACUAUGACACAAA  
>mmu\_piR\_018850|gb|DQ699161|Mus\_musculus:9:67499822:67499850:M  
inus  
UCCUCAGAUGGUGAUAAUAGUUUGUUA

>mmu\_piR\_026377|gb|DQ710139|Mus\_musculus:6:92136659:92136687:Plus  
UAGCCACAUAUCAAACUUCUAUGUUGUC

>mmu\_piR\_035076|gb|DQ722721|Mus\_musculus:15:59088970:59088998:Minus  
UAUGCGUUAUGCUUGUUCUUAUUUUUAUUA

>mmu\_piR\_022148|gb|DQ703975|Mus\_musculus:8:95082728:95082756:Plus  
GUCUAUCCCAUGGUCAAGGACCUGGUGAC

>mmu\_piR\_034952|gb|DQ722530|Mus\_musculus:5:150084119:150084147:Minus  
UCCCAGAGGAGUCUGUAAAAGAAGUAAAAG

>mmu\_piR\_012191|gb|DQ689230|Mus\_musculus:7:69808278:69808306:Plus  
UGCCAAUAUAUGGGUCACUUAUGUAGUUA

>mmu\_piR\_008158|gb|DQ566409|Mus\_musculus:12:98825541:98825569:Plus  
UAGCCUCACUUCGAAUUCAGUGUUGAGCU

>mmu\_piR\_006554|gb|DQ561403|Mus\_musculus:2:148919555:148919583:Minus  
UUCGACUUGUGCUAUAGUGAAAUUGGCGC

>mmu\_piR\_024115|gb|DQ706860|Mus\_musculus:4:100105752:100105780:Plus  
UCCAUUCACAGCUGCGACUGAACAAUUGU

>mmu\_piR\_010994|gb|DQ687375|Mus\_musculus:13:52134942:52134970:Plus  
UGCCGAUGAUGUUUAGUGGCUACCUGGA

>mmu\_piR\_001590|gb|DQ543759|Mus\_musculus:15:83181783:83181811:Minus  
UCGGGCCUAUUUGUAGGAUGUGGGACACU

>mmu\_piR\_020936|gb|DQ702217|Mus\_musculus:17:27033693:27033721:Minus  
UGAGUUGCCUGGCUCUGAAGCCUUGCUCU

>mmu\_piR\_004169|gb|DQ551943|Mus\_musculus:8:96308230:96308258:Minus  
GUUGUUCUUGUUGUUUGCCUCUCUCUCUC

>mmu\_piR\_006758|gb|DQ561906|Mus\_musculus:6:127771883:127771911:Plus  
UUGCCUGGGUGAUCUGGUAAAUGGGCUCU

>mmu\_piR\_010055|gb|DQ685909|Mus\_musculus:5:150090142:150090170:Minus  
UAACACUGUACUGGAGUGACGUUCUCAUA

>mmu\_piR\_016015|gb|DQ694952|Mus\_musculus:7:73012154:73012182:Plus  
lus

GACCAGCAACAAAAGCAUGAAACCAGCCA  
>mmu\_piR\_025477|gb|DQ708814|Mus\_musculus:9:54013680:54013708:Minus  
GCUUCAGCGACCCUCUAGGACCAGUGUUC  
>mmu\_piR\_017110|gb|DQ696565|Mus\_musculus:5:113573053:113573081:Minus  
UACCUACGAGAAAAGUGCGUCUGAAAUG  
>mmu\_piR\_011328|gb|DQ687887|Mus\_musculus:13:24997914:24997942:Minus  
UUAAGAUCAAAUAGGACCAGCCACCACU  
>mmu\_piR\_009660|gb|DQ685273|Mus\_musculus:6:127783735:127783763:Plus  
UGCACUUGCCUUGGUCUUCAGAACGAUCA  
>mmu\_piR\_031923|gb|DQ718047|Mus\_musculus:9:54018329:54018357:Minus  
UUGUAUCUAAAUAUGGAUGAAUGUAUGUG  
>mmu\_piR\_037568|gb|DQ726323|Mus\_musculus:15:88810129:88810157:Minus  
UGC UUUCACAAUGCUUUAGGCUGUGCUAG  
>mmu\_piR\_007948|gb|DQ565706|Mus\_musculus:12:98801418:98801446:Minus  
UAGAAGACUUGUGAGGUCCAGGGGCUCGA  
>mmu\_piR\_002056|gb|DQ545131|Mus\_musculus:4:93813504:93813532:Minus  
UGAAACUCUCCAUCUGCAUCUGCCUCAGC  
>mmu\_piR\_012939|gb|DQ690387|Mus\_musculus:1:134811251:134811279:Minus  
UGGGAGUCUUUAGUUUGUGCAAACGUGC  
>mmu\_piR\_009204|gb|DQ569640|Mus\_musculus:15:78490853:78490881:Minus  
UCAGUUCUACUGUGCCUUGAGAGGGAGUC  
>mmu\_piR\_006467|gb|DQ561193|Mus\_musculus:6:85954801:85954829:Minus  
UCCAAGCUGGGUGGCCUCUGGACUCUGA  
>mmu\_piR\_005319|gb|DQ555782|Mus\_musculus:X:19979878:19979906:Minus  
UGGUCUCUCGUGAGUUCUUGGGUGUCUGC  
>mmu\_piR\_015007|gb|DQ693468|Mus\_musculus:14:22935205:22935233:Plus  
UGUUUUGGAAUGAAAUCUGUAUGGGGAGG  
>mmu\_piR\_023059|gb|DQ705303|Mus\_musculus:11:104390338:104390366:Plus  
UGCGUUGUACUUGAUCUCUUAAGCAUUCA  
>mmu\_piR\_027923|gb|DQ712352|Mus\_musculus:5:150091394:150091423

:Minus  
UAAAAUUUUUGAUUCUUCACAGCCUGGCC  
>mmu\_piR\_010284|gb|DQ686259|Mus\_musculus:8:23534381:23534410:Plus  
UGCCAACUGAGCUACAUCCUAAGCCCCAAA  
>mmu\_piR\_007568|gb|DQ564405|Mus\_musculus:11:107812607:107812636:Plus  
UACAGAAAGGUGACCUCAGAUACAAAUGG  
>mmu\_piR\_034638|gb|DQ722068|Mus\_musculus:11:103244248:103244277:Plus  
UAGGCAAGACAGACUAUCAGCCCUGCAGGC  
>mmu\_piR\_024443|gb|DQ707326|Mus\_musculus:12:98800838:98800867:Minus  
UAGACAUGGUAUUUGUAUUACUAUAGGAAU  
>mmu\_piR\_036589|gb|DQ724905|Mus\_musculus:17:22224135:22224164:Plus  
UGCUGUGGCCUCCUCAUCACAAAGGGAUCC  
>mmu\_piR\_026546|gb|DQ710384|Mus\_musculus:15:78487587:78487616:Minus  
UGGGCCGUCCUGAACACUACAUCAGUCUCU  
>mmu\_piR\_008701|gb|DQ568211|Mus\_musculus:6:83318083:83318112:Minus  
UAUGACGGAUGCCCUCAGAGCCCUCACUGA  
>mmu\_piR\_034361|gb|DQ721675|Mus\_musculus:14:23195743:23195772:Minus  
UGCAAUCCUUGACUUUCAGGAAUUGUGCAU  
>mmu\_piR\_016409|gb|DQ695534|Mus\_musculus:15:59098355:59098384:Minus  
UCCCAGGCAUCAUCUGUGGGUGACAAAUGU  
>mmu\_piR\_020551|gb|DQ701659|Mus\_musculus:12:81598537:81598566:Plus  
UAGGACACCAGCAUUAACCAUUCAGGUUCC  
>mmu\_piR\_020262|gb|DQ701235|Mus\_musculus:15:78482904:78482933:Minus  
UAAAAGAGUGUAUGUUUUCUGCAGGUAUGU  
>mmu\_piR\_028561|gb|DQ713265|Mus\_musculus:6:127753076:127753105:Minus  
GCCAUGGUGUCUGAACCCAGCCAGUCCUAAG  
>mmu\_piR\_023004|gb|DQ705222|Mus\_musculus:8:113017086:113017115:Plus  
GGAACUCCCAUUAACAUGCCUACUUGUGA  
>mmu\_piR\_005212|gb|DQ555435|Mus\_musculus:7:73679013:73679042:Minus  
UGGGUUUAUGCCUAGGAAUGGUAGAGCUGG

>mmu\_piR\_026642|gb|DQ710518|Mus\_musculus:7:72985214:72985243:Plus  
UCCAGUCGAUGUGAUGGAUAUUGUUGACA

>mmu\_piR\_016085|gb|DQ695058|Mus\_musculus:9:67498888:67498917:Minus  
UACGUCAUGAGUAGAUCAAGAUGACUGCCA

>mmu\_piR\_028228|gb|DQ712800|Mus\_musculus:5:113581744:113581773:Plus  
UAGGUUCCCCACUCCCAUGAAUUUCCUC

>mmu\_piR\_020498|gb|DQ701570|Mus\_musculus:11:95584011:95584040:Plus  
UAUGGAUCUAGUCCCUCUUGGAGGUUUGU

>mmu\_piR\_007153|gb|DQ562923|Mus\_musculus:10:62064847:62064876:Plus  
UAACCCCGGAACUUUGUGACGACUGCCAG

>mmu\_piR\_025458|gb|DQ708786|Mus\_musculus:4:146039956:146039985:Plus  
UAACUCUAUUUAGUAGAUAGUAAUGCCUGA

>mmu\_piR\_037607|gb|DQ726376|Mus\_musculus:5:130438074:130438103:Plus  
UGAUAUGUAGGAUCCCUCUCAGAUGUCAAG

>mmu\_piR\_015969|gb|DQ694890|Mus\_musculus:9:67528641:67528670:Minus  
UACUCUGGCUUCUCUGGGUUAUAGUGCACC

>mmu\_piR\_014537|gb|DQ692773|Mus\_musculus:6:127800191:127800220:Plus  
UAGAACUACAUCAGCCAGCGUCAGCCCAA

>mmu\_piR\_004916|gb|DQ554389|Mus\_musculus:8:38562499:38562528:Minus  
UGGAAAAGGUGUUUUCUUCUAAUGCAAGA

>mmu\_piR\_033234|gb|DQ720025|Mus\_musculus:4:134900536:134900565:Plus  
UAAACUGGGAUGUGUCCCCUGCAAGCACAC

>mmu\_piR\_013968|gb|DQ691935|Mus\_musculus:10:66091791:66091820:Minus  
GACCAGACUCAGACUUGUGUGUGUUGCAUA

>mmu\_piR\_002402|gb|DQ546417|Mus\_musculus:12:98797482:98797511:Minus  
UGACAUCUCUGACUUUCUGGGGUCUCCAUU

>mmu\_piR\_001964|gb|DQ544821|Mus\_musculus:2:92385353:92385382:Plus  
UCUUGGUCGUGCCAUAUACUUGUAGAGGGCC

>mmu\_piR\_010097|gb|DQ685983|Mus\_musculus:14:23192318:23192347:Minus

UUCUGCAUGUAAUGUUAACUGUCUUUGAU  
>mmu\_piR\_025910|gb|DQ709437|Mus\_musculus:9:67521862:67521891:Minus  
UACUAUUCGCCAGUGCGGACUGGAGCCAUC  
>mmu\_piR\_028807|gb|DQ713619|Mus\_musculus:12:98801985:98802014:Minus  
UCUGUUUACCACCCAGGAUGUGAGUGCUUC  
>mmu\_piR\_012441|gb|DQ689597|Mus\_musculus:4:93800128:93800157:Minus  
UGAUCAGAAUGGUGUACAUAAAUGUCAGUA  
>mmu\_piR\_022208|gb|DQ704075|Mus\_musculus:6:128412986:128413015:Plus  
UGGGAAGAAAUCAUUCUCUAUGUUGCAAU  
>mmu\_piR\_005279|gb|DQ555698|Mus\_musculus:2:118397764:118397793:Plus  
UGGUCAAGUCUUCAGAGCCUCACUCUGGUC  
>mmu\_piR\_022073|gb|DQ703865|Mus\_musculus:15:74473791:74473820:Plus  
UGAAUAACCAUAACUGCCAUCGAAAUGUG  
>mmu\_piR\_021496|gb|DQ703000|Mus\_musculus:5:113585429:113585458:Plus  
UGAGAACAACAAGCCUAAGGCACACAAGCCC  
>mmu\_piR\_001951|gb|DQ544790|Mus\_musculus:5:113590203:113590232:Plus  
UCUUCUUUGGCAGCAGUUCAGUCCCUUAGC  
>mmu\_piR\_034917|gb|DQ722471|Mus\_musculus:8:96306533:96306562:Minus  
UUACAUCUCCACAGAGUUUAGGUACUGCUU  
>mmu\_piR\_033354|gb|DQ720206|Mus\_musculus:18:35698104:35698133:Plus  
UAAGUAUGCCAGCAUCUCUUGGAAGGAUGA  
>mmu\_piR\_035237|gb|DQ722957|Mus\_musculus:12:98798203:98798232:Minus  
GUUUCAUUGCUUUUGAGCUUGUGGUAAGGC  
>mmu\_piR\_025020|gb|DQ708149|Mus\_musculus:2:92380908:92380937:Plus  
UCCAGAGUCAGAAGCUUGUGUGAGUUAAAU  
>mmu\_piR\_012380|gb|DQ689507|Mus\_musculus:5:150084337:150084366:Minus  
UACAAGUCCUCCUCAGACUAGGAUCAUGUG  
>mmu\_piR\_004918|gb|DQ554398|Mus\_musculus:18:67214940:67214969:Plus  
UGGGAACGGGUCACGAAUCCUUGUGCCU  
>mmu\_piR\_004906|gb|DQ554362|Mus\_musculus:5:115108841:115108870

:Minus  
UGGCUUCUGGAUUAACUGAAAACUGAGUAA  
>mmu\_piR\_030760|gb|DQ716408|Mus\_musculus:2:37396246:37396275:Minus  
UGCCUAAUAGACCUGUUUCAGUUUUGCAG  
>mmu\_piR\_004020|gb|DQ551401|Mus\_musculus:2:92371469:92371498:Plus  
UGCUCACACCUUUGCCUCCUUUUGACAUG  
>mmu\_piR\_000867|gb|DQ541626|Mus\_musculus:2:92380967:92380996:Plus  
GCCUUUUUGGAUGGUCUCGAUUACUGCAG  
>mmu\_piR\_032017|gb|DQ718177|Mus\_musculus:12:98789358:98789387:Minus  
UCAACUACAGAUGGAUAGUUUAUCAUAGG  
>mmu\_piR\_007944|gb|DQ565681|Mus\_musculus:18:67158443:67158472:Minus  
UAGAACCUUCAUGUGUGUCUGGCCUGAUU  
>mmu\_piR\_037533|gb|DQ726274|Mus\_musculus:4:57454586:57454615:Minus  
UAGCCCUUCCUAUUGAGUAUGCAUCCAAG  
>mmu\_piR\_027521|gb|DQ711786|Mus\_musculus:3:35059496:35059525:Plus  
UGUGAUUUUUGUGUGUAUGAGAUUUGAAUC  
>mmu\_piR\_006284|gb|DQ560806|Mus\_musculus:5:113575152:113575181:Minus  
UUAGAACGGAGAACAAGAGUACCGGGUGAC  
>mmu\_piR\_027707|gb|DQ712047|Mus\_musculus:10:18510041:18510070:Minus  
UAUCAGUGUUUCUGUUGGGGACAACAGC  
>mmu\_piR\_022995|gb|DQ705208|Mus\_musculus:2:92378427:92378456:Plus  
UGCUGUUGUACAAACAAACAUUUCCAGUC  
>mmu\_piR\_026287|gb|DQ710011|Mus\_musculus:7:73686968:73686997:Minus  
UACAGUAUAAACAACACUGCUGUAUGAGAC  
>mmu\_piR\_008204|gb|DQ566586|Mus\_musculus:7:73709383:73709412:Plus  
UAGGAAACAUCUUCAGGACACGUUGGAGAC  
>mmu\_piR\_036672|gb|DQ725031|Mus\_musculus:7:73014340:73014369:Plus  
UGUUAGGCAUGGAUGACAACAUGCAUUUCC  
>mmu\_piR\_029987|gb|DQ715323|Mus\_musculus:13:24914515:24914544:Plus  
UGCUCUAUACCGCCUAGGGAUUCUGCUAGC

>mmu\_piR\_018578|gb|DQ698757|Mus\_musculus:10:62081087:62081116:  
Plus  
UGGGCAACACUCGUGAACUGGUUCGACCC  
>mmu\_piR\_021996|gb|DQ703744|Mus\_musculus:7:73695515:73695544:P  
lus  
UGGAAUUUGUUGUCUGUGUCACGGACUUGC  
>mmu\_piR\_004682|gb|DQ553780|Mus\_musculus:8:96309594:96309623:M  
inus  
UGGCACUCCUUCAUCACGUCUACAAGCAAC  
>mmu\_piR\_004322|gb|DQ552555|Mus\_musculus:9:67531721:67531750:M  
inus  
UAAAGUGUGUGAAAUGUUUGGACAUGUCUA  
>mmu\_piR\_025646|gb|DQ709061|Mus\_musculus:8:26102725:26102754:M  
inus  
UCACAGAAUAUUGCGAUGGAUCCUCUAGCC  
>mmu\_piR\_018665|gb|DQ698882|Mus\_musculus:7:69784019:69784048:P  
lus  
UAAAGUAGAAAGAGUGACUGGGUAGAGCCC  
>mmu\_piR\_003628|gb|DQ550431|Mus\_musculus:6:85078398:85078427:M  
inus  
UGCCUCCCUGCUGGUAUUUCUCAUCCUCCU  
>mmu\_piR\_037065|gb|DQ725598|Mus\_musculus:7:72990666:72990695:P  
lus  
UCUCAUUUUAUAAGCUGUGGUGGUUCUCC  
>mmu\_piR\_010029|gb|DQ685871|Mus\_musculus:7:29846710:29846739:P  
lus  
UCACUAUGUCAUAUAGUUCAGGGUGUACUU  
>mmu\_piR\_004644|gb|DQ553692|Mus\_musculus:18:67171525:67171554:  
Minus  
UGGCAAGAGGUGGAUAAGGAAGGUUAGGU  
>mmu\_piR\_036056|gb|DQ724160|Mus\_musculus:9:67537600:67537629:P  
lus  
UGUGGACAUUUCUGCCAUCUACAUGCUGU  
>mmu\_piR\_030705|gb|DQ716332|Mus\_musculus:6:127771378:127771407  
:Plus  
UCAGAUUUUGAGACGCUUUGACUGUGAAGA  
>mmu\_piR\_022728|gb|DQ704837|Mus\_musculus:5:113567390:113567419  
:Minus  
UGACAAAACAAAUCCUCCUUCUGCUAGUCA  
>mmu\_piR\_027799|gb|DQ712182|Mus\_musculus:15:59102799:59102828:  
Minus  
UCCACCAAACACAAAACUGCAACAUUCA  
>mmu\_piR\_033628|gb|DQ720606|Mus\_musculus:13:53406668:53406697:  
Plus



UGAUUGGAACCCUAUUUCAGUCUCCAUGGU  
>mmu\_piR\_016302|gb|DQ695377|Mus\_musculus:6:128165269:128165298  
:Minus  
UGUACAGCCAAACAAGGUGACUAGCCAUCG  
>mmu\_piR\_027875|gb|DQ712282|Mus\_musculus:1:90097320:90097349:M  
inus  
CAGGCUUAGAACUGAAAAGCGUUUCUCUUG  
>mmu\_piR\_007728|gb|DQ564911|Mus\_musculus:12:98817594:98817623:  
Minus  
UACCCGAACUGUAAGGUUCUUCAGGGAGA  
>mmu\_piR\_016082|gb|DQ695055|Mus\_musculus:2:92347894:92347923:P  
lus  
UACUAUUGAUACUGUGCGUGUCAGAUGACU  
>mmu\_piR\_013424|gb|DQ691108|Mus\_musculus:12:98825258:98825287:  
Plus  
UGGGACAGUCCUUUGCCUUUACUGAUUCA  
>mmu\_piR\_030257|gb|DQ715709|Mus\_musculus:12:98839978:98840007:  
Plus  
UACAAGUACACUGGCAAACUCCCACUGGGU  
>mmu\_piR\_001008|gb|DQ542064|Mus\_musculus:13:50313589:50313618:  
Plus  
UCCAAUGCCUCAGAUGGUCCUGAUCUGUUG  
>mmu\_piR\_020513|gb|DQ701594|Mus\_musculus:15:74472936:74472965:  
Plus  
UGGAAACACAUGGGUAUUGCACAAGGGCUU  
>mmu\_piR\_019429|gb|DQ699992|Mus\_musculus:6:127770090:127770119  
:Plus  
UGGAAUGCUGGCCCAUCCUGGCCCCUGACA  
>mmu\_piR\_030586|gb|DQ716165|Mus\_musculus:1:100123137:100123166  
:Plus  
UCCGAGUUGGAGACAAAGUCUUGGUCAGAC  
>mmu\_piR\_001135|gb|DQ542473|Mus\_musculus:15:72929697:72929726:  
Minus  
UCCCAACACACAUUCAGUAUACAUGCUC  
>mmu\_piR\_003378|gb|DQ549694|Mus\_musculus:9:67507804:67507833:M  
inus  
UGCCAAGAUUUUCAGCUUGCCUGCCCUGUU  
>mmu\_piR\_037899|gb|DQ726795|Mus\_musculus:14:22943283:22943312:  
Plus  
UGAGAAGAUUUCAGUCCCCAAACCUCCUC  
>mmu\_piR\_029719|gb|DQ714936|Mus\_musculus:6:92135070:92135099:P  
lus  
UAUAGUUCGAGUCUAUUUAAAUCUCUGUAG  
>mmu\_piR\_021452|gb|DQ702936|Mus\_musculus:7:69777961:69777990:M

inus  
UACUUUUUCCUUUUGCUUGGUCCAGAUAAAG  
>mmu\_piR\_027427|gb|DQ711654|Mus\_musculus:7:52783385:52783414:Plus  
UUAUGAUCAUUGACCUGCUUUCUGUUGCAA  
>mmu\_piR\_020021|gb|DQ700882|Mus\_musculus:18:67187256:67187285:Minus  
UAAGUUCAUACUCUGAGUUAGGGCUGAGAC  
>mmu\_piR\_019445|gb|DQ700012|Mus\_musculus:2:150950775:150950804:Minus  
UAACAAUGGGUCUACUCUGUGGAGAAAGGA  
>mmu\_piR\_012296|gb|DQ689388|Mus\_musculus:15:59089526:59089555:Minus  
UAUCAGAAAGAGUCAAGGCAGUCUCGCCAG  
>mmu\_piR\_035296|gb|DQ723048|Mus\_musculus:5:150067350:150067379:Minus  
UAAAAAUGGCAACCCAAUCUUCUGAGAGGC  
>mmu\_piR\_014685|gb|DQ692977|Mus\_musculus:8:113014604:113014633:Plus  
UCCACAAUAGUUUGGUAACUGUAUAUGGGA  
>mmu\_piR\_024042|gb|DQ706756|Mus\_musculus:9:54943550:54943579:Minus  
UGGAAUACUCCUUUGUUGAUGGCUUAGUCC  
>mmu\_piR\_018149|gb|DQ698089|Mus\_musculus:6:127761402:127761431:Minus  
UAAUGAUUGGCUUUGAAAGGUAGACUCAA  
>mmu\_piR\_030917|gb|DQ716635|Mus\_musculus:17:66130117:66130146:Plus  
UGAAGUUUAUACAACAGUGAUGUCAGCUACC  
>mmu\_piR\_022305|gb|DQ704221|Mus\_musculus:2:92343018:92343047:Plus  
AGAGUAAGGAUGUUGGUGUGGCCACGGCU  
>mmu\_piR\_002735|gb|DQ547514|Mus\_musculus:10:86010555:86010584:Minus  
UGAGGAAACAUUUCAGUGUCUUAGAUUAUC  
>mmu\_piR\_006737|gb|DQ561866|Mus\_musculus:4:57455411:57455440:Minus  
UUGCCACCGAGAUUCGAGUGAAGAAUGAGA  
>mmu\_piR\_024400|gb|DQ707267|Mus\_musculus:9:67508107:67508136:Minus  
UAAUUAUCCCCUACUGAAAUAACAUAUUC  
>mmu\_piR\_003907|gb|DQ551158|Mus\_musculus:5:117544118:117544147:Minus  
UGCUGCCAGCCGUCACGAUUCUGGAUAGUC

>mmu\_piR\_015012|gb|DQ693475|Mus\_musculus:6:128412874:128412903  
:Plus  
UGACUCUUGUCGACAUCAUCUGCUAAGAGC

>mmu\_piR\_030029|gb|DQ715381|Mus\_musculus:17:27042486:27042515:  
Minus  
UGCUCAGCUUUGAAUUCUGGCAGGAAAAAA

>mmu\_piR\_035943|gb|DQ723996|Mus\_musculus:2:92385527:92385556:P  
lus  
UACUUGCCUAUCCUGUUGCUGAAUCCAUG

>mmu\_piR\_027247|gb|DQ711393|Mus\_musculus:17:27048004:27048033:  
Minus  
UGCGGAUGAACAUUAAGCUUGCUCUUCAGGU

>mmu\_piR\_000403|gb|DQ540496|Mus\_musculus:17:27047773:27047802:  
Minus  
CACCAACCAAGAUCUUCAGUUUAUUCGUG

>mmu\_piR\_022131|gb|DQ703949|Mus\_musculus:18:67182974:67183003:  
Minus  
AAGAAAGACGCUUUUGGCAGCAGGCAUUUC

>mmu\_piR\_033963|gb|DQ721101|Mus\_musculus:14:23180186:23180215:  
Minus  
UGCAUCCUCGAGAUGAAACCUACUUGAUC

>mmu\_piR\_011898|gb|DQ688747|Mus\_musculus:8:95083378:95083407:P  
lus  
CACAUUCAAUACAUUUCUAACGGGCCCGUC

>mmu\_piR\_032590|gb|DQ719026|Mus\_musculus:5:113590750:113590779  
:Plus  
UAAUUUCCUUAUUUGCUGUCCUCCCCCCC

>mmu\_piR\_017264|gb|DQ696798|Mus\_musculus:4:112963945:112963974  
:Minus  
UGAUUGCUGAUCUGCAUCCUGCGUAGCUU

>mmu\_piR\_013358|gb|DQ691003|Mus\_musculus:14:22924087:22924116:  
Plus  
AGGAAGAUAAAGAGAAUCCACAACCACCAUC

>mmu\_piR\_026837|gb|DQ710794|Mus\_musculus:7:73667563:73667592:M  
inus  
UAGUGCCAUCCUACAGCUAUUUGUCAGAGC

>mmu\_piR\_019863|gb|DQ700638|Mus\_musculus:3:108326821:108326850  
:Minus  
UAGACAAGUCCAUAUCUAGGACCUCAGU

>mmu\_piR\_023388|gb|DQ705779|Mus\_musculus:3:109088575:109088604  
:Plus  
UAGUUUGAGAGUUUAACACAAAUUGGGUC

>mmu\_piR\_012017|gb|DQ688941|Mus\_musculus:9:71092942:71092971:P  
lus

UGUGUGUGUGAUCAGUGGUUCUCAACCUGU  
>mmu\_piR\_006780|gb|DQ561945|Mus\_musculus:10:127101184:127101213:Plus  
UUGCUUGGUUCUUUCAUUGUGAUCUUCACC  
>mmu\_piR\_001210|gb|DQ542709|Mus\_musculus:5:115109251:115109280:Minus  
UCCCCUAGGUUCUCAGACCCUUCUGGAGUC  
>mmu\_piR\_013532|gb|DQ691279|Mus\_musculus:7:69795812:69795841:Plus  
UACUUUGGGAUUCCUGAUUGCCAAACAA  
>mmu\_piR\_029682|gb|DQ714886|Mus\_musculus:17:66088206:66088235:Minus  
UCCUGAGAGCAAUCUUAUCAUGGCUUCU  
>mmu\_piR\_003457|gb|DQ549918|Mus\_musculus:2:92348043:92348072:Plus  
UGCCAGAUGCCUUCUUCUCCUCUUCUUGGU  
>mmu\_piR\_018691|gb|DQ698919|Mus\_musculus:5:113576431:113576460:Minus  
UCCGUGGUUUCUCUACAUGGAUGGUCUUC  
>mmu\_piR\_013890|gb|DQ691809|Mus\_musculus:7:72992769:72992798:Plus  
UAAUUCUACAUAAGUGAAAGGGAUGUUUA  
>mmu\_piR\_003308|gb|DQ549440|Mus\_musculus:6:127774939:127774968:Plus  
UGCAUCUGGAAGUGUCCUGUUGCCCAACCC  
>mmu\_piR\_012739|gb|DQ690054|Mus\_musculus:12:98804739:98804768:Minus  
UGUUAUUGCCAUUUUUGUCAGGUCCAUGAU  
>mmu\_piR\_026557|gb|DQ710397|Mus\_musculus:4:149403639:149403668:Minus  
UAGUAGGAAAUGACUACAUGUCGGGUGGU  
>mmu\_piR\_018273|gb|DQ698296|Mus\_musculus:10:75282942:75282971:Plus  
UAAUCUAGGAUGACACAAUGACUCAAAGU  
>mmu\_piR\_014578|gb|DQ692831|Mus\_musculus:7:72996096:72996125:Plus  
UAGGGAUUUCUGAUAGUAUCAUUCUGACCC  
>mmu\_piR\_023552|gb|DQ706026|Mus\_musculus:4:93814839:93814868:Minus  
UCCUCAUGUGGUCCAAGUUAGAUAUUUUC  
>mmu\_piR\_006485|gb|DQ561232|Mus\_musculus:13:50578916:50578945:Minus  
UCCAGCUCAUAGGGAUGCCUGUAUCCUUC  
>mmu\_piR\_012981|gb|DQ690454|Mus\_musculus:17:27076213:27076242:

Plus  
UAAGCUGUAGAUCAAAGAAAGAUUAUGUCAU  
>mmu\_piR\_020947|gb|DQ702232|Mus\_musculus:12:98807921:98807950:  
Minus  
UGCCAAGUUGAAUAGUUGUUACUUAUAGG  
>mmu\_piR\_014696|gb|DQ692992|Mus\_musculus:9:67528906:67528935:M  
inus  
UCCAUAAGGUAAGAAUGCAAUGUGAUAGC  
>mmu\_piR\_008768|gb|DQ568405|Mus\_musculus:2:150848171:150848200  
:Plus  
UAUGUAUCAUGAAGCCUGGUGAUCUUUAGU  
>mmu\_piR\_001661|gb|DQ544104|Mus\_musculus:9:67513839:67513868:M  
inus  
UCUACUCCCUGUACACUGACCUUCUGAUUC  
>mmu\_piR\_011924|gb|DQ688791|Mus\_musculus:5:113579546:113579575  
:Minus  
UCCUGUGCAUCGAGAUUAUCUUUUCUUGGU  
>mmu\_piR\_000580|gb|DQ540862|Mus\_musculus:11:106317126:10631715  
5:Plus  
CCGGGUGAUGCGAAUCGUAUCUGAGCCGA  
>mmu\_piR\_003832|gb|DQ550954|Mus\_musculus:11:120805600:12080562  
9:Minus  
UGCUAUGUGCCACAUGAGUGCCUUUGAAUC  
>mmu\_piR\_035247|gb|DQ722971|Mus\_musculus:7:73687574:73687603:M  
inus  
UCAAGCAAAGCAGAGCCACAGAAUGUAGA  
>mmu\_piR\_031501|gb|DQ717469|Mus\_musculus:7:125120998:125121027  
:Minus  
UCAUUAUGCCUUUUCUCCCUACAGAUUCU  
>mmu\_piR\_006354|gb|DQ560963|Mus\_musculus:5:150059045:150059074  
:Minus  
UCAAAGCUCACCCUGUCACAGGUGCUACC  
>mmu\_piR\_007040|gb|DQ562688|Mus\_musculus:18:67183024:67183053:  
Minus  
UUUCUCUCAGGAUAGGUUAAGCAAAAAAU  
>mmu\_piR\_021911|gb|DQ703627|Mus\_musculus:6:127767197:127767226  
:Plus  
UGACCACCCAGCAGAGUGACUGUGCCAGAG  
>mmu\_piR\_030198|gb|DQ715628|Mus\_musculus:4:93814244:93814273:M  
inus  
CCUGAUACUGUUGUGUGGAUAAGUUUCUCC  
>mmu\_piR\_023435|gb|DQ705850|Mus\_musculus:14:22938005:22938034:  
Plus  
GGAAAAAGAAUAGCCCCACGCAUCCCUGAC

>mmu\_piR\_025716|gb|DQ709163|Mus\_musculus:13:24913613:24913642:  
Plus  
UCAACUGAAUCUUUCUGAACUCAUCAGCAA  
>mmu\_piR\_032381|gb|DQ718719|Mus\_musculus:7:73665255:73665284:M  
inus  
UCAUAAGAAAGAACAACUGUGUUGGGGG  
>mmu\_piR\_011230|gb|DQ687734|Mus\_musculus:9:3184929:3184958:Min  
us  
GGAAAAGGUUGAAUUUCUUGUGAUUGCUA  
>mmu\_piR\_027687|gb|DQ712017|Mus\_musculus:17:66117339:66117368:  
Plus  
UAGGUUUGAUUGCAAGACCAAACUCAAUGG  
>mmu\_piR\_035595|gb|DQ723468|Mus\_musculus:4:57455116:57455145:M  
inus  
UCAGAGUUUACAUUGGAGAGCCCUCGUUCU  
>mmu\_piR\_037237|gb|DQ725840|Mus\_musculus:2:151013100:151013129  
:Plus  
GGCCUGAUGACUUGAAACACCCUGUAAGGA  
>mmu\_piR\_031300|gb|DQ717174|Mus\_musculus:9:54039549:54039578:M  
inus  
UUUGUGUAUAUUUGUACAAAUGGCAAUGG  
>mmu\_piR\_035861|gb|DQ723878|Mus\_musculus:17:27086721:27086750:  
Plus  
UGCACAGUGAGAAUCGUGAAGGGGACCAGG  
>mmu\_piR\_033537|gb|DQ720480|Mus\_musculus:6:87957263:87957292:M  
inus  
UACCACUCAGUGUUAUCAAGACCAAGUCGC  
>mmu\_piR\_001160|gb|DQ542545|Mus\_musculus:4:124444265:124444294  
:Plus  
UCCCACUUCAGUAAAACCUUUCUAGAGACA  
>mmu\_piR\_020690|gb|DQ701867|Mus\_musculus:4:123341906:123341935  
:Minus  
UAGAUUUGGCAAAACAUGUUUCCUACACUG  
>mmu\_piR\_007508|gb|DQ564151|Mus\_musculus:7:125122162:125122191  
:Minus  
UACAACUCUUCAGGGACACUGGUGGUGUGG  
>mmu\_piR\_016585|gb|DQ695801|Mus\_musculus:12:98817486:98817515:  
Minus  
UCCUUUGGCUAUUUUUGUGAACCCUGCAAU  
>mmu\_piR\_001643|gb|DQ544072|Mus\_musculus:10:75292808:75292837:  
Plus  
UCUAAGUGGCCUAUGAGAAAGCAUGUCCUC  
>mmu\_piR\_014512|gb|DQ692738|Mus\_musculus:17:66109525:66109554:  
Minus

UGGAUGGAAUUAGAAAGUAUCACCCCAAGU  
>mmu\_piR\_024871|gb|DQ707936|Mus\_musculus:2:92390532:92390561:Plus  
UUUUCUUUAGAGAGUUUGGAGUCAGCAUCU  
>mmu\_piR\_005799|gb|DQ557371|Mus\_musculus:9:54022411:54022440:Minus  
UGUGAAGUCACCAGCAUUGGGCUUCCAGGG  
>mmu\_piR\_011871|gb|DQ688705|Mus\_musculus:12:98789492:98789521:Minus  
UGAGCUUUCGACCCUAGUGCCCAGAGACUC  
>mmu\_piR\_024171|gb|DQ706951|Mus\_musculus:6:127754486:127754515:Minus  
UGAAAUGAAGCAGUCCAACUUGGCAAUG  
>mmu\_piR\_027085|gb|DQ711143|Mus\_musculus:5:145421761:145421790:Plus  
UACUCAAUUGAUGGCACUGCCUUGAGACC  
>mmu\_piR\_027456|gb|DQ711693|Mus\_musculus:17:25010925:25010954:Plus  
UAUAAAGACCAUCCUAAACCUGGAGCAUUC  
>mmu\_piR\_001153|gb|DQ542533|Mus\_musculus:7:69802409:69802438:Plus  
UCCCACAGUUGUGUGAUUACCUCUGCCUGC  
>mmu\_piR\_004455|gb|DQ552995|Mus\_musculus:13:50923312:50923341:Minus  
UGGAAUCUUGGGUGCAAGUGCUGUGAAGGU  
>mmu\_piR\_028549|gb|DQ713248|Mus\_musculus:17:27069813:27069842:Plus  
UGCGUUGAGCUCAUUAUCCAGAAAAGCACA  
>mmu\_piR\_015527|gb|DQ694233|Mus\_musculus:1:164315707:164315736:Plus  
UGGAUAUGCUAUAUGAUAGCUGAGUCAGUC  
>mmu\_piR\_023669|gb|DQ706220|Mus\_musculus:17:27027895:27027924:Minus  
UGACUAAGAUGAGAGCCACGGUGGGGUCA  
>mmu\_piR\_021007|gb|DQ702307|Mus\_musculus:12:98835059:98835088:Plus  
UGAAGAAAAUGCAUGAUCUGCCUCCAAC  
>mmu\_piR\_005019|gb|DQ554846|Mus\_musculus:14:22924524:22924553:Plus  
UGGGAUGUCUCUGAGGUUAUAUUAUCCUA  
>mmu\_piR\_032723|gb|DQ719220|Mus\_musculus:7:73012432:73012461:Plus  
UUAAUUAUUGUGAUUGAAAUGUUGGUCCC  
>mmu\_piR\_033710|gb|DQ720729|Mus\_musculus:7:125120133:125120162

:Minus  
UCCAUAUCUUUGCUACCAUACAGAUGGA  
>mmu\_piR\_028526|gb|DQ713215|Mus\_musculus:5:113589181:113589210  
:Plus  
GCUCUGCAAAGGGCCAGGACGCUCGCUCGU  
>mmu\_piR\_024654|gb|DQ707648|Mus\_musculus:18:67189087:67189116:  
Minus  
UGAGAUUUGUCACUGUGCUCAGAAAGAUUU  
>mmu\_piR\_002170|gb|DQ545527|Mus\_musculus:7:69790616:69790645:P  
lus  
UGAACUAUUCACCCUACAAAGAGUCCAAGA  
>mmu\_piR\_035506|gb|DQ723335|Mus\_musculus:13:51156914:51156943:  
Minus  
UAAAACCAUGUGUUAUGACAGGCGCCCGU  
>mmu\_piR\_016640|gb|DQ695884|Mus\_musculus:12:98810458:98810487:  
Minus  
UCCAUGAGUUUGGCUUUAUACAACCUUGUA  
>mmu\_piR\_032291|gb|DQ718585|Mus\_musculus:7:72995193:72995222:P  
lus  
UGAUGACCAUAUCCUCCUUAUUUGGAGAC  
>mmu\_piR\_012365|gb|DQ689484|Mus\_musculus:17:66117004:66117033:  
Plus  
UGGAAUAGUCUUGGAAUUUUGCUUACUCAU  
>mmu\_piR\_002566|gb|DQ546926|Mus\_musculus:10:75302354:75302383:  
Plus  
UGAGAAAUCCUAGGUAGCAGAAGUAGGU  
>mmu\_piR\_002612|gb|DQ547096|Mus\_musculus:14:22925076:22925105:  
Plus  
UGAGAGAAAGCAUCUGGGGAGAAGCCGAUC  
>mmu\_piR\_008052|gb|DQ566059|Mus\_musculus:4:93803030:93803059:M  
inus  
UAGAUUUGGUAGAGGUUUUCAGGACUGG  
>mmu\_piR\_015388|gb|DQ694012|Mus\_musculus:2:92343986:92344015:P  
lus  
UUUUUACAGAGAUGUAUGAAGUUGUGUCUU  
>mmu\_piR\_019295|gb|DQ699792|Mus\_musculus:12:98800268:98800297:  
Minus  
UUAAGCUAAGCCUUCUGGUAAGUUCAGAG  
>mmu\_piR\_001101|gb|DQ542346|Mus\_musculus:16:14390455:14390484:  
Minus  
UCCAGUCGAGCUGAGGUUGUGAACCCCGGU  
>mmu\_piR\_013075|gb|DQ690586|Mus\_musculus:7:73018943:73018972:P  
lus  
UCUUAGCAAACUGGUAUGUUAAGUGCGCCA



>mmu\_piR\_023539|gb|DQ706004|Mus\_musculus:12:98839575:98839604:  
Plus  
UGACUCUCAACUCUUGGUUAUUUGAAUGGU  
>mmu\_piR\_010245|gb|DQ686198|Mus\_musculus:12:98819021:98819050:  
Minus  
UGAUUAUAAGAAGGAGCCUGUGCACCCUC  
>mmu\_piR\_029245|gb|DQ714273|Mus\_musculus:4:93776060:93776089:M  
inus  
UAGAAGGAUACAUAGUAGUUCUAUCUUGGA  
>mmu\_piR\_025655|gb|DQ709074|Mus\_musculus:15:78486188:78486217:  
Minus  
UACGCACCAUGUUUCUUAACUUUAUCCC  
>mmu\_piR\_023262|gb|DQ705587|Mus\_musculus:12:98823238:98823267:  
Plus  
UAAGUUUGAAACCACUUUGCGUGUCACUGC  
>mmu\_piR\_022147|gb|DQ703974|Mus\_musculus:10:75300780:75300809:  
Plus  
UGGGAGACAGCAGUGACACUGCCAGGUACC  
>mmu\_piR\_006192|gb|DQ558476|Mus\_musculus:17:27078042:27078071:  
Plus  
UGUUUGUUUGUUGUACAGGUCCUGGGCAUC  
>mmu\_piR\_035874|gb|DQ723899|Mus\_musculus:7:125121028:125121057  
:Minus  
UGGUAGAUUAUAUUGUAAGUAGCCACGAUA  
>mmu\_piR\_006741|gb|DQ561872|Mus\_musculus:17:27046067:27046096:  
Minus  
UUGCCAGUGACCACUUUGUGAUCUCUUGUA  
>mmu\_piR\_022636|gb|DQ704710|Mus\_musculus:2:150954518:150954547  
:Minus  
UGUAUAUACCAGGCACUGGCAUAGGCCUC  
>mmu\_piR\_012233|gb|DQ689294|Mus\_musculus:12:98847721:98847750:  
Plus  
UGUUUUUGUAAUUCUAACAUGGACUUGUCA  
>mmu\_piR\_020497|gb|DQ701569|Mus\_musculus:9:52838511:52838540:P  
lus  
GCUCAACAUGACUCACCUGCAAUGCUGCCU  
>mmu\_piR\_024876|gb|DQ707944|Mus\_musculus:15:59082578:59082607:  
Minus  
UGAUGUAAAUGUAGAGUAGAAGCCGUGUA  
>mmu\_piR\_036601|gb|DQ724924|Mus\_musculus:15:83184017:83184046:  
Minus  
UCCCCAUUUCACAGAUGAGGAAACUGAAGC  
>mmu\_piR\_029530|gb|DQ714670|Mus\_musculus:17:27034752:27034781:  
Minus

UAGAGCUUCAGAUGAUUAUCUUUGCAACUGC  
>mmu\_piR\_007246 | gb | DQ563274 | Mus\_musculus:6:127772440:127772469  
:Plus  
UAAGAUCAGGCCAGAUGGAUUGGAUUAGGU  
>mmu\_piR\_015674 | gb | DQ694444 | Mus\_musculus:1:93235144:93235173:M  
inus  
UGAUACUUCCAAGCAUCAGUGUGUCAGAC  
>mmu\_piR\_019651 | gb | DQ700319 | Mus\_musculus:17:79240680:79240709:  
Minus  
UGCGCUGAGCAAGAUCUCCAAGACCCUGUC  
>mmu\_piR\_009783 | gb | DQ685471 | Mus\_musculus:12:98815721:98815750:  
Minus  
UCUGCCAAGGAUUAGGGUUGACGACUCUGU  
>mmu\_piR\_020222 | gb | DQ701174 | Mus\_musculus:13:53409405:53409434:  
Plus  
UGAGAGUCAAGUGGCUUGUCCACCAGGAGA  
>mmu\_piR\_003781 | gb | DQ550807 | Mus\_musculus:2:92351218:92351247:P  
lus  
UGC UAAACUGGGAGCUCUUUGGGGUCAGG  
>mmu\_piR\_015237 | gb | DQ693795 | Mus\_musculus:14:18434576:18434605:  
Minus  
UCCGAAGUUGGGCAGAGCAAUGCUUGGAGG  
>mmu\_piR\_037515 | gb | DQ726248 | Mus\_musculus:2:92397390:92397419:P  
lus  
UGCAAGCUUGUAUUCUUGUCAGUGUCCCAG  
>mmu\_piR\_023311 | gb | DQ705660 | Mus\_musculus:13:24914127:24914156:  
Plus  
UAAAUUUGAAGACAGCCGGUUUCCCCGGG  
>mmu\_piR\_033950 | gb | DQ721082 | Mus\_musculus:18:64617683:64617712:  
Plus  
UAAAAUGUACUUCAUAUGAAUUCUAUUUAA  
>mmu\_piR\_022344 | gb | DQ704287 | Mus\_musculus:17:27046563:27046592:  
Minus  
UAAACUCAGUUCUUCACGCUGGCACCCAAG  
>mmu\_piR\_003228 | gb | DQ549208 | Mus\_musculus:5:150094031:150094060  
:Minus  
UGCAGAGAUCGGGUUUUAAAUCUUGAAAGC  
>mmu\_piR\_009763 | gb | DQ685432 | Mus\_musculus:11:72896570:72896599:  
Plus  
UAUAGUAUUUAAUACUGUAUUGCUCUACAG  
>mmu\_piR\_009255 | gb | DQ569783 | Mus\_musculus:10:62081779:62081808:  
Plus  
UCAUGUCUCAACCAUGCUGGCCUAGAAUUC  
>mmu\_piR\_018786 | gb | DQ699067 | Mus\_musculus:2:118530251:118530280

:Plus  
UAGGAGUUCAAAACCAGUCUGGGUCAUGAG  
>mmu\_piR\_003247|gb|DQ549245|Mus\_musculus:17:27046834:27046863:  
Minus  
UGCAGCAGCCCUCUUCAUUGACCUGAACCC  
>mmu\_piR\_015864|gb|DQ694736|Mus\_musculus:5:113562214:113562243  
:Minus  
UAAUCAGCCACAUAUUUCAACAUAUCCGGG  
>mmu\_piR\_023841|gb|DQ706465|Mus\_musculus:9:67536108:67536137:P  
lus  
UAAAGAAUUUGGCAUCUAAUUUAUGGGUCC  
>mmu\_piR\_011712|gb|DQ688458|Mus\_musculus:6:128151231:128151260  
:Minus  
UCCUACUUUAUCCAUAUAGCUUGCUGCCUA  
>mmu\_piR\_020694|gb|DQ701872|Mus\_musculus:17:66115128:66115157:  
Plus  
UCCUAAGUGAUCUUCGCAUAUCACUGGAAC  
>mmu\_piR\_029317|gb|DQ714380|Mus\_musculus:2:150944089:150944118  
:Minus  
UUCAGCACCCUAUGUGUUAUCCUACAGAA  
>mmu\_piR\_001194|gb|DQ542648|Mus\_musculus:15:83184371:83184400:  
Minus  
UCCCAUGCUCACCCUGUGUUGCCAGACAGC  
>mmu\_piR\_038131|gb|DQ727136|Mus\_musculus:17:27035924:27035953:  
Minus  
UCCAUGGUGAUUUUAAGCUCAGUCAAUA  
>mmu\_piR\_016380|gb|DQ695491|Mus\_musculus:4:45419865:45419894:M  
inus  
UGAGAUAGCCGCGAUCUAAACUUUCUGUUC  
>mmu\_piR\_007725|gb|DQ564901|Mus\_musculus:6:85080169:85080198:M  
inus  
UACCCAGGUUGCAAAGGCAUUAUACCUCC  
>mmu\_piR\_037210|gb|DQ725804|Mus\_musculus:9:67528220:67528249:M  
inus  
UGCAAGCCUGCUACGGGCAUUUGUAAUGAG  
>mmu\_piR\_015073|gb|DQ693558|Mus\_musculus:9:67568764:67568793:P  
lus  
UGGAAGGAUAGAAAGGCAGGGUCAUCCUCC  
>mmu\_piR\_001500|gb|DQ543538|Mus\_musculus:18:67170969:67170998:  
Minus  
UCCUUGGAGUGCCUCGCCACAAAGCAGAGG  
>mmu\_piR\_027865|gb|DQ712269|Mus\_musculus:3:113223181:113223210  
:Minus  
UAAAAUUGGAUGUCUAGGAUAAUGAUUGUC

>mmu\_piR\_017227|gb|DQ696747|Mus\_musculus:5:102073739:102073768  
:Minus  
UGUAUAAAGGUGGUAGAAACUUAUUUUUUGC  
>mmu\_piR\_013156|gb|DQ690714|Mus\_musculus:2:92348396:92348425:P  
lus  
UGCCAUCGCUGGUGAAACAGGUACCCUAAC  
>mmu\_piR\_026990|gb|DQ710995|Mus\_musculus:5:113576746:113576775  
:Minus  
UAGCUAAGCAAGCAGGCAGACAUUCUGCUC  
>mmu\_piR\_013728|gb|DQ691574|Mus\_musculus:4:41997542:41997571:M  
inus  
UGAGAUGCUCACAUUGGGUAAGCUACUGCU  
>mmu\_piR\_033349|gb|DQ720196|Mus\_musculus:17:27037823:27037852:  
Minus  
ACGGCACGGGCCUGUGAUCACAGUGGAUGU  
>mmu\_piR\_024614|gb|DQ707585|Mus\_musculus:2:92363171:92363200:P  
lus  
UCCUAAGAAGAAUAAGCAUAAGAGGAAGAA  
>mmu\_piR\_037083|gb|DQ725621|Mus\_musculus:15:59093352:59093381:  
Minus  
UCACACAAUUUAGAUAGCAAUGCCUCCAA  
>mmu\_piR\_000996|gb|DQ541998|Mus\_musculus:15:73000819:73000848:  
Minus  
UCCAAGGUGAGGUAGGGAAGAUGCUGUCCC  
>mmu\_piR\_020835|gb|DQ702070|Mus\_musculus:12:98848185:98848214:  
Plus  
UGUAACAACCAUAUCUAUGCCACACACUUC  
>mmu\_piR\_020176|gb|DQ701103|Mus\_musculus:4:93823399:93823428:M  
inus  
UGAACUUUCUGUUGGUCAAGUCAAAUUGUC  
>mmu\_piR\_004482|gb|DQ553117|Mus\_musculus:12:98789030:98789059:  
Minus  
UGGACAGGUAUGCAACGUAUCUAAAUGCU  
>mmu\_piR\_032423|gb|DQ718781|Mus\_musculus:14:22940184:22940213:  
Plus  
UCAAGAAGAGGAGACCUACCGAGAGCACA  
>mmu\_piR\_029793|gb|DQ715031|Mus\_musculus:5:113571236:113571265  
:Minus  
UGAAUCCACAGCAUUGUGCCCUCUAGGCUA  
>mmu\_piR\_007677|gb|DQ564756|Mus\_musculus:14:22941914:22941943:  
Plus  
UACCACAUGCUGUCACAAUUACAACAUC  
>mmu\_piR\_026347|gb|DQ710099|Mus\_musculus:4:93782561:93782590:M  
inus

UGCUCAGUCAGCUUUCUCUACGUUUUAUAUA  
>mmu\_piR\_035825 | gb | DQ723829 | Mus\_musculus:7:69806665:69806694:Plus  
UGGGAAGUACAGAAAUUCCUGUAGAGAC  
>mmu\_piR\_006674 | gb | DQ561723 | Mus\_musculus:12:98817198:98817227:Minus  
UUGACCACAGAGUCAGGAAAAGCUAGGUGU  
>mmu\_piR\_030525 | gb | DQ716082 | Mus\_musculus:5:102073960:102073989:Minus  
UGCGGCCUGCAUUCUUUUUCUAAGUACCUC  
>mmu\_piR\_004507 | gb | DQ553208 | Mus\_musculus:9:67539024:67539053:Plus  
UGGACUUCGGGAGUCGUUCUUCUGCCUCUA  
>mmu\_piR\_013227 | gb | DQ690805 | Mus\_musculus:2:150845485:150845514:Plus  
UCAAUUCAACUUCAGACAGUGGUUCUGUAC  
>mmu\_piR\_020894 | gb | DQ702156 | Mus\_musculus:7:73688634:73688663:Minus  
UACAAGACUGUCAACUAGUCAUGGGAACA  
>mmu\_piR\_022366 | gb | DQ704319 | Mus\_musculus:15:74464427:74464456:Plus  
UGGCAGGAAUCCUGAUGAACAAGUUUGACU  
>mmu\_piR\_010077 | gb | DQ685945 | Mus\_musculus:18:67172427:67172456:Minus  
UCUGAAGAUUUUGAGAGUUCAGAGACCAC  
>mmu\_piR\_032762 | gb | DQ719281 | Mus\_musculus:8:113894082:113894111:Minus  
UAAGUGAGUACUGUAGCUAAAAGUUUCUGA  
>mmu\_piR\_028204 | gb | DQ712770 | Mus\_musculus:5:113591799:113591828:Plus  
UUGAUUUUCUAGCUACGGUUUGCCCUAUG  
>mmu\_piR\_002254 | gb | DQ545849 | Mus\_musculus:2:92386899:92386928:Plus  
UGAAGGUGUUCUGUCAACUUGAAUAAACUA  
>mmu\_piR\_005338 | gb | DQ555820 | Mus\_musculus:1:93233490:93233519:Minus  
UGGUGAACCUCAACCUCUGAUGUGCUCUGU  
>mmu\_piR\_004796 | gb | DQ554091 | Mus\_musculus:6:127772845:127772874:Plus  
UGGCCUCAUCCACAUGUUACUAAUGCCUGA  
>mmu\_piR\_013769 | gb | DQ691631 | Mus\_musculus:10:127103025:127103054:Plus  
UACAAGUGUGUCUAAAUGUUUGUCUUGUA  
>mmu\_piR\_002479 | gb | DQ546670 | Mus\_musculus:6:127801805:127801834

:Plus  
UGACGAGUUGAAACCGGUGAACCUAUCAGG  
>mmu\_piR\_031807|gb|DQ717884|Mus\_musculus:9:67518767:67518796:Minus  
ACGAGGUUAGAUUGUUUCCAGUAGCCAGU  
>mmu\_piR\_024168|gb|DQ706948|Mus\_musculus:19:37322856:37322885:Minus  
UACAAAUGGUGGCGAUUUGUGCCGAUUGGC  
>mmu\_piR\_029843|gb|DQ715104|Mus\_musculus:9:116659711:116659740:Plus  
UACCUUGAAGCUCAUGGGUCGCCUAGCCUG  
>mmu\_piR\_015607|gb|DQ694347|Mus\_musculus:5:150059978:150060007:Minus  
UACAAAUCGGCGUGUUCUAUCUUGACAAGU  
>mmu\_piR\_021683|gb|DQ703273|Mus\_musculus:6:127774038:127774067:Plus  
UGGGUUUUUGUAAUAGGUCCCUUCUUGAUC  
>mmu\_piR\_035364|gb|DQ723141|Mus\_musculus:5:144014339:144014368:Plus  
UAAUCUCACUUGGAACCUGCAAGUUAGGUA  
>mmu\_piR\_021843|gb|DQ703520|Mus\_musculus:8:113012557:113012586:Plus  
UACCUAAAGGUUUGGAAGGCUGUGAAGCGC  
>mmu\_piR\_005460|gb|DQ556243|Mus\_musculus:10:94104396:94104425:Minus  
UGGUUCAGGCAUUCUUUAAGGAACUAAGUC  
>mmu\_piR\_028945|gb|DQ713819|Mus\_musculus:7:73019020:73019049:Plus  
UGCUCACUAAUAAGGAAUAGUCAAAAAAG  
>mmu\_piR\_032115|gb|DQ718323|Mus\_musculus:12:98825658:98825687:Plus  
UGGCAGCCCACUCAUCCAUAAGAAAUAAA  
>mmu\_piR\_006397|gb|DQ561051|Mus\_musculus:15:74469105:74469134:Plus  
UUCACAGAAAGGGAACCUUCAGGGACCAGG  
>mmu\_piR\_017074|gb|DQ696510|Mus\_musculus:7:69807226:69807255:Plus  
UCUUAUUUCCUUCUACUACGAUUGUGGAA  
>mmu\_piR\_016248|gb|DQ695299|Mus\_musculus:4:93801343:93801372:Minus  
UAGUAAAGUGGAAGUUUAUAGAUUCUCCUCC  
>mmu\_piR\_005068|gb|DQ554994|Mus\_musculus:18:67185877:67185906:Minus  
UGGGCCUGCAAUGAACUGAUCUCUACUUA

>mmu\_piR\_030931|gb|DQ716656|Mus\_musculus:7:73688016:73688045:Plus  
CAUGCGAUGUGUUGCAGAGACGUACUACAA

>mmu\_piR\_030239|gb|DQ715679|Mus\_musculus:8:96305698:96305727:Minus  
GAAACAAAUGAAACCAAGGGUCAGGACAAA

>mmu\_piR\_016063|gb|DQ695027|Mus\_musculus:13:52135021:52135050:Plus  
UGUAAAGACGCACCACGCAGAUGAUGAUAC

>mmu\_piR\_021717|gb|DQ703328|Mus\_musculus:12:98809236:98809265:Minus  
UGUACAAUGCCAUGGUCUGCCACCAGCAGA

>mmu\_piR\_007476|gb|DQ564019|Mus\_musculus:5:113591070:113591099:Plus  
UAAUUUGGGUCUCUGUUUGCCAUGUUUCUA

>mmu\_piR\_009577|gb|DQ685145|Mus\_musculus:5:28748461:28748490:Plus  
UGUUAGAUGCCUACUUGACCUUCCUAGGA

>mmu\_piR\_025541|gb|DQ708896|Mus\_musculus:9:54025174:54025203:Minus  
UGACACAAACUCACAUGUGAAAAAAAUGGU

>mmu\_piR\_021171|gb|DQ702542|Mus\_musculus:8:95079388:95079417:Plus  
UACAGUUUAACUGUUUCUGUUGCGCCUC

>mmu\_piR\_021695|gb|DQ703290|Mus\_musculus:2:92349363:92349392:Plus  
UAGAUCUCAGAGCAUACAGCACUUUCAGGU

>mmu\_piR\_019141|gb|DQ699568|Mus\_musculus:15:74470225:74470254:Plus  
UACUCACAGGGAUUCAGUGUUCUUAACAGG

>mmu\_piR\_022734|gb|DQ704845|Mus\_musculus:9:67554034:67554063:Plus  
CACAAAUGCAGAGCAUGAAUCCCAUAGAA

>mmu\_piR\_030115|gb|DQ715503|Mus\_musculus:6:103123049:103123078:Minus  
UCCUAUCUCAGUUGUAAACACUGCCUGGCU

>mmu\_piR\_004427|gb|DQ552920|Mus\_musculus:15:103020853:103020882:Minus  
UGGAAGUACUUAGUGACCUUGGUGAGUUUC

>mmu\_piR\_007532|gb|DQ564267|Mus\_musculus:10:86011991:86012020:Minus  
UACAAUGAGGGUUCAGUGUGAUUUUCUGC

>mmu\_piR\_017631|gb|DQ697341|Mus\_musculus:6:81864744:81864773:Minus

UAGACAAAGCUGUUUAAAGUUCUAAUAUC  
>mmu\_piR\_036208|gb|DQ724371|Mus\_musculus:4:93801610:93801639:Minus  
UAGGGGAUAGUCUCAUAGGGAACUUUCUAU  
>mmu\_piR\_023258|gb|DQ705583|Mus\_musculus:7:73710861:73710890:Plus  
UCCAAGACCAUGGAAUAGUGAGCGCUACUC  
>mmu\_piR\_003968|gb|DQ551297|Mus\_musculus:18:67163563:67163592:Minus  
UGCUGUUUUACAGGGACUAUUAUUGUUGG  
>mmu\_piR\_027625|gb|DQ711929|Mus\_musculus:7:72979843:72979872:Plus  
UACAAAGGUUAAAUUGUGGUAUGGCCAGUG  
>mmu\_piR\_010903|gb|DQ687224|Mus\_musculus:14:43859066:43859095:Plus  
UGAGUGUAUUCAUCCAAGGGGUGGCAAUGU  
>mmu\_piR\_000046|gb|AB251089|Mus\_musculus:6:127791433:127791462:Plus  
UGGACUAUGUCGAGUUAGGGUGGAAAGGGG  
>mmu\_piR\_008999|gb|DQ569100|Mus\_musculus:13:50338804:50338833:Plus  
UCACAAGAUGCCAGGUGUCUACUUUCUGA  
>mmu\_piR\_026077|gb|DQ709691|Mus\_musculus:15:83182506:83182535:Minus  
UGGGCAUCUGAGUGUUAAUUAAGGGUCAUU  
>mmu\_piR\_037218|gb|DQ725813|Mus\_musculus:7:28918889:28918918:Minus  
UACAGAUCAGUACAUUUUAGUGUAUCUACA  
>mmu\_piR\_016673|gb|DQ695934|Mus\_musculus:9:54014167:54014196:Minus  
UAUAAGAUGGAGUCUAUUAGGCAGAACACA  
>mmu\_piR\_009609|gb|DQ685200|Mus\_musculus:6:128411387:128411416:Plus  
UUCAAGCCAAACUCAUUAGGCUAACUGAGA  
>mmu\_piR\_015399|gb|DQ694031|Mus\_musculus:7:69777832:69777861:Minus  
UCCCCACAAAUAUCUCUCUAGGAAGUAGCC  
>mmu\_piR\_016850|gb|DQ696193|Mus\_musculus:17:27030525:27030555:Minus  
UAAAGUGCUGUUUGAUGCCAAAAGCAGGUC  
>mmu\_piR\_024728|gb|DQ707741|Mus\_musculus:5:150090274:150090304:Minus  
UAGACUGCUCACUAUGCUGUGGAAUUACGG  
>mmu\_piR\_031697|gb|DQ717742|Mus\_musculus:5:115107969:115107999



:Minus  
GCGUGCAACCCACCAAAGGCUGACUGUCAGU  
>mmu\_piR\_012447|gb|DQ689609|Mus\_musculus:18:67185755:67185785:  
Minus  
AUAACAUCAAUGUUUAUGAGGCCAGAAACU  
>mmu\_piR\_035215|gb|DQ722926|Mus\_musculus:10:85196652:85196682:  
Plus  
UGUCAAGGUUGUGGCAAUACUUUAUGACUGC  
>mmu\_piR\_015264|gb|DQ693831|Mus\_musculus:18:67174064:67174094:  
Minus  
UAAAAACAUAUACAAACAACAUAUAAAUGGAC  
>mmu\_piR\_034201|gb|DQ721440|Mus\_musculus:5:150087666:150087696  
:Minus  
UGAAAUGAAAUGAAAUAACUCAAGCACUCA  
>mmu\_piR\_037041|gb|DQ725561|Mus\_musculus:9:67495546:67495576:M  
inus  
UCACACUGAUUGAUCUGUGAAUACUGAACCA  
>mmu\_piR\_011891|gb|DQ688730|Mus\_musculus:10:62059079:62059109:  
Plus  
UAUAUAUAUAAAGUAUACAUAUAUACUAAA  
>mmu\_piR\_029686|gb|DQ714891|Mus\_musculus:7:73694022:73694052:P  
lus  
CAGACUGGGUUAUUGUUUGUGUCUUUCCCC  
>mmu\_piR\_009155|gb|DQ569530|Mus\_musculus:5:115100692:115100722  
:Minus  
UCAGCCAAAUUCUAAUCCAUAUUAUUG  
>mmu\_piR\_003181|gb|DQ549037|Mus\_musculus:5:113582428:113582458  
:Plus  
UGCAAUUCAGCUUCCUGCGGUGUUGGUUGC  
>mmu\_piR\_005919|gb|DQ557795|Mus\_musculus:2:92373262:92373292:P  
lus  
UGUGCUUGGCUUUGGUGUCUCGAGACUCAUC  
>mmu\_piR\_008366|gb|DQ567190|Mus\_musculus:17:22402172:22402202:  
Plus  
UAGGUGACUUUAACUUUCCCUUGAUUGGUU  
>mmu\_piR\_029503|gb|DQ714629|Mus\_musculus:10:86021047:86021077:  
Minus  
UGACAUUUCUAACCACUAAAUACAAAUGU  
>mmu\_piR\_004497|gb|DQ553164|Mus\_musculus:2:92398652:92398682:P  
lus  
UGGACUAUUCUGGGUAGCUGAGAUUCAGGC  
>mmu\_piR\_010657|gb|DQ686860|Mus\_musculus:18:67186827:67186857:  
Minus  
UAGGUACCCACGUACUGUAAAAUACAUGCA

>mmu\_piR\_037901|gb|DQ726797|Mus\_musculus:9:67534083:67534113:Plus  
UGAGACAAUGAGGUUCUCAAUAAAAGUGUGU  
>mmu\_piR\_031459|gb|DQ717400|Mus\_musculus:10:85193899:85193929:Plus  
UAGUACUCAUCAGAUGACACAUGAGAGGAUU  
>mmu\_piR\_011843|gb|DQ688661|Mus\_musculus:7:69777031:69777061:Minus  
UGAAGAUCUUGAUGAGUUUUUCAUGGCUUC  
>mmu\_piR\_015940|gb|DQ694850|Mus\_musculus:17:27045569:27045599:Minus  
UGGCCUGUAUCGCCUAUACACAGAAGGCAGU  
>mmu\_piR\_028584|gb|DQ713301|Mus\_musculus:12:98787899:98787929:Minus  
UAAGCUAACAAGCUGUUACAGUGUAUCCUUC  
>mmu\_piR\_028100|gb|DQ712626|Mus\_musculus:17:27056710:27056740:Plus  
UACAAUACAGGCUUGGAAGAAAGAGGUUCCC  
>mmu\_piR\_016581|gb|DQ695793|Mus\_musculus:15:59085169:59085199:Minus  
UGCAAUUAAUAUUUAGGUAAAUCCACUGGC  
>mmu\_piR\_004618|gb|DQ553605|Mus\_musculus:13:53410018:53410048:Plus  
UGGAUUCUGUUACAAGGUGCACAAGUCACU  
>mmu\_piR\_037967|gb|DQ726902|Mus\_musculus:7:73683819:73683849:Minus  
UAAGACAUGCCACCCUGUGAGAACCAGGGGA  
>mmu\_piR\_020768|gb|DQ701971|Mus\_musculus:9:54033948:54033978:Minus  
UGUCCAGAACUAGUAGAAGAUACACCUAUUC  
>mmu\_piR\_034170|gb|DQ721392|Mus\_musculus:13:50214128:50214158:Minus  
UAGAAAUUGACAGAU AUGCAAAAUAAGGG  
>mmu\_piR\_017615|gb|DQ697321|Mus\_musculus:18:67173992:67174022:Minus  
UAUAUAUAACAAUAUUUUAAAAAGGAAAC  
>mmu\_piR\_012038|gb|DQ688971|Mus\_musculus:4:93812673:93812703:Minus  
UCCAUUCACUACUAUUUAUUGCCUUAUCCUG  
>mmu\_piR\_019506|gb|DQ700105|Mus\_musculus:7:69776459:69776489:Minus  
UGCCU AUGUGUAGAUCUAAAGAUAAAUACUC  
>mmu\_piR\_038845|gb|piRNA\_2070|Mus\_musculus:2:150951276:150951306:Minus

UGUUUAAAUAGCAAUUGGGAUUCUCCUCAG  
>mmu\_piR\_034775|gb|DQ722259|Mus\_musculus:14:22937376:22937406:  
Plus  
UGAAGCCUCAAUGCCAUAACAAGGUGCAUGC  
>mmu\_piR\_010626|gb|DQ686811|Mus\_musculus:2:150846218:150846248  
:Plus  
CACCAUGGUUCAUACAUGUGUCUACUUAUGU  
>mmu\_piR\_012636|gb|DQ689900|Mus\_musculus:2:92382707:92382737:P  
lus  
UCGACUGAGAGGUCUCUUUACUACUCCCCUA  
>mmu\_piR\_013186|gb|DQ690751|Mus\_musculus:4:134901499:134901529  
:Plus  
UAAUAUGUCUAAAGCCUAGAGCCUUCACUUC  
>mmu\_piR\_019291|gb|DQ699787|Mus\_musculus:5:150084728:150084758  
:Minus  
UGAGCUGAGCAAAAGUAGCCAUCCUCUGCAG  
>mmu\_piR\_018538|gb|DQ698703|Mus\_musculus:7:73693080:73693110:P  
lus  
UGGCCAAAUCGUGCAUGCGCACCUUGUUUUC  
>mmu\_piR\_010041|gb|DQ685887|Mus\_musculus:6:128414799:128414829  
:Plus  
UUGGCUAUUUAAAGAAACAGGAAAGUUUGUC  
>mmu\_piR\_026806|gb|DQ710753|Mus\_musculus:9:20184492:20184522:M  
inus  
UGGAAUUAAGUUAUGUGUCCUUGCCUGC  
>mmu\_piR\_035520|gb|DQ723354|Mus\_musculus:10:85194997:85195027:  
Plus  
UUGAGUAUAUAGUUCACAUUAUCAUAACCCAC  
>mmu\_piR\_034606|gb|DQ722017|Mus\_musculus:7:73689712:73689742:M  
inus  
UUAUAAGUGAAUACUAUAAAUCAAGAUGAAG  
>mmu\_piR\_015172|gb|DQ693701|Mus\_musculus:4:123343494:123343524  
:Minus  
UAGAAGCCAACGGUUAUGUUUGACCCCAGG  
>mmu\_piR\_034118|gb|DQ721321|Mus\_musculus:2:92354156:92354186:P  
lus  
UAGAUGGCACUUCAUGUUUGCUCUUAUGA  
>mmu\_piR\_022431|gb|DQ704419|Mus\_musculus:7:69786513:69786543:P  
lus  
UACACUGUCUUCACCUGACCCCAGGACCUGC  
>mmu\_piR\_009104|gb|DQ569383|Mus\_musculus:14:43710439:43710469:  
Minus  
UCACUUGAUGUCAUAUCUCCUGCUGGAGGU  
>mmu\_piR\_027320|gb|DQ711494|Mus\_musculus:9:54051682:54051712:P

lus  
UAAUUACAGAGAAGCAGAAAAGCAAUGUGCA  
>mmu\_piR\_031678|gb|DQ717718|Mus\_musculus:4:61711988:61712018:M  
inus  
UCCUCGUCGUCCUCCUGGUUUGGAGUUAACA  
>mmu\_piR\_014368|gb|DQ692525|Mus\_musculus:17:27047406:27047436:  
Minus  
UCCUUGACCGGACCUAAGCCAAGGUGAAUCC  
>mmu\_piR\_006622|gb|DQ561597|Mus\_musculus:18:67175704:67175734:  
Minus  
UUCUUCUACGUUUUAACUUCUAUCUGCCUC  
>mmu\_piR\_001998|gb|DQ544903|Mus\_musculus:8:96305866:96305896:M  
inus  
UCUUUUUUUCCAGGGUGCAUCAUAAAUGC  
>mmu\_piR\_035715|gb|DQ723666|Mus\_musculus:15:59104298:59104328:  
Minus  
UAUAAAACAGAAAAUUUAUUGGCAGCAGCC  
>mmu\_piR\_001384|gb|DQ543270|Mus\_musculus:2:127391213:127391243  
:Plus  
UCCUCCUCGUCACUUACGAAAACCAUAAGUC  
>mmu\_piR\_002113|gb|DQ545344|Mus\_musculus:18:67179069:67179099:  
Minus  
UGAAAUGAUGCCAGGAUGUUACUGGAAUCCC  
>mmu\_piR\_004208|gb|DQ552123|Mus\_musculus:4:93778141:93778171:M  
inus  
UAAAACUCCAGGUAGACAUUAUGCAAUGGGU  
>mmu\_piR\_036440|gb|DQ724699|Mus\_musculus:15:59086258:59086288:  
Minus  
UGGGCAAUAAGACUGGACACUUAAGCGUUUC  
>mmu\_piR\_028773|gb|DQ713572|Mus\_musculus:6:86989721:86989751:M  
inus  
UAGCAGUUAACUAACUGUUCUUUCAGAAGUC  
>mmu\_piR\_004402|gb|DQ552816|Mus\_musculus:5:150071369:150071399  
:Minus  
UACAGGGACCUCAGAGAAAACAAGGGAUGU  
>mmu\_piR\_014962|gb|DQ693401|Mus\_musculus:7:73656793:73656823:M  
inus  
CAAACUCUCACAGAGGUCAAGAGAUGCAUCU  
>mmu\_piR\_009921|gb|DQ685696|Mus\_musculus:17:27063278:27063308:  
Plus  
UGCUCAUUGCCAUGACAGUAACAACCAAUU  
>mmu\_piR\_016255|gb|DQ695309|Mus\_musculus:9:51603471:51603501:P  
lus  
UGAGUGCAUUCACAUGUAUCUUUCUGAAAUG

>mmu\_piR\_010030|gb|DQ685872|Mus\_musculus:10:75283667:75283697:  
Plus  
UACUAAUGGUCCCAUGUCUCAAACAUGCUU  
>mmu\_piR\_021480|gb|DQ702976|Mus\_musculus:15:59090269:59090299:  
Minus  
UGAACACACUGACCAGAACUAACUGGAAGGU  
>mmu\_piR\_025606|gb|DQ709006|Mus\_musculus:3:69157478:69157508:M  
inus  
UCCUAUGUAGUGCACAUAACUCUUAUAAA  
>mmu\_piR\_005570|gb|DQ556771|Mus\_musculus:4:93808847:93808877:M  
inus  
UGUAAUUGUUGUAUUCUCAGUGUCAUUGGUC  
>mmu\_piR\_030035|gb|DQ715390|Mus\_musculus:15:59091345:59091375:  
Minus  
UGUGACUAUGGAGCAACAAGCUUGGGAGUC  
>mmu\_piR\_023428|gb|DQ705841|Mus\_musculus:17:27036788:27036818:  
Minus  
UUGGCUUUGCAAGAGCUGUAGUGUCCUCCCA  
>mmu\_piR\_001388|gb|DQ543274|Mus\_musculus:6:128157986:128158016  
:Minus  
UCCUCCUUCAGUGUGUCAAGAAGCUGGGCAC  
>mmu\_piR\_002722|gb|DQ547471|Mus\_musculus:7:73677904:73677934:M  
inus  
UGAGCUGAGCAAGUCGAUUCACAGGAUCCCC  
>mmu\_piR\_034903|gb|DQ722448|Mus\_musculus:12:98818046:98818076:  
Minus  
UCCAGCAGGUUUUACUGUUCAAGUAAUUGG  
>mmu\_piR\_024187|gb|DQ706972|Mus\_musculus:2:92385276:92385306:P  
lus  
UGCCACGUUAGCUUAUCGUUAGCUUAUCAUG  
>mmu\_piR\_007700|gb|DQ564820|Mus\_musculus:10:40170891:40170921:  
Plus  
UACCAGGGCCGAAAUGAAGUCAUUGACAUG  
>mmu\_piR\_017875|gb|DQ697687|Mus\_musculus:2:92346509:92346539:P  
lus  
GCUCUGUAAACAACUGUUGUUAGGCAGCGA  
>mmu\_piR\_029998|gb|DQ715338|Mus\_musculus:14:22950542:22950572:  
Plus  
UAGAGCAAUCUCCUCUAACUCAGGACAUACA  
>mmu\_piR\_016781|gb|DQ696087|Mus\_musculus:4:93796455:93796485:M  
inus  
UAUAAAGCACAAAGACCAAGGUGACUGACUGG  
>mmu\_piR\_009409|gb|DQ684858|Mus\_musculus:15:78489982:78490012:  
Minus

UGUUAGCUUGAUUUCUGACUUCUCAUAUUU  
>mmu\_piR\_007974 | gb | DQ565796 | Mus\_musculus:10:18491799:18491829:  
Minus  
UAGAAUGCCCUAUGAAAACCUCUGCCAUGGU  
>mmu\_piR\_011010 | gb | DQ687401 | Mus\_musculus:4:93791043:93791073:M  
inus  
GCUAUCUAGGAGUUGUUAGAUGUUAUCUCA  
>mmu\_piR\_024456 | gb | DQ707344 | Mus\_musculus:7:72990109:72990139:P  
lus  
UGGAAGGUGAUCUGGUUCCACUUAGCCA  
>mmu\_piR\_030072 | gb | DQ715443 | Mus\_musculus:7:125123748:125123778  
:Minus  
UAAGAGUCUGUACAAGGUGUACAGUGUAU  
>mmu\_piR\_025236 | gb | DQ708465 | Mus\_musculus:15:59099016:59099046:  
Minus  
CUCACUGUGAUAAACUGGAGCCACCCAAGA  
>mmu\_piR\_015876 | gb | DQ694758 | Mus\_musculus:15:59102042:59102072:  
Minus  
UGAUAGGUUUUUGCUUCCUGGAUUGCUGUC  
>mmu\_piR\_013353 | gb | DQ690998 | Mus\_musculus:18:67186152:67186182:  
Minus  
UGGACACCCUGUAUGUCUAAGCCAGCCAGCC  
>mmu\_piR\_036446 | gb | DQ724705 | Mus\_musculus:6:81864035:81864065:M  
inus  
UGAUUAUGCAUUCUGUAUCCCAGGCAAGGC  
>mmu\_piR\_005561 | gb | DQ556754 | Mus\_musculus:11:103263745:10326377  
5:Plus  
UGUAAUGCUUUCUGACCAAGGUGUCACCAUG  
>mmu\_piR\_008500 | gb | DQ567645 | Mus\_musculus:X:100601505:100601535  
:Minus  
UAGUCCAUCAUUGCCUAAGAAUUUCAUG  
>mmu\_piR\_018022 | gb | DQ697890 | Mus\_musculus:4:93782133:93782163:M  
inus  
UAAAAACUAACUUUAGGACAAGUAUGAUGAU  
>mmu\_piR\_023816 | gb | DQ706431 | Mus\_musculus:14:22927639:22927669:  
Plus  
UGUUUAUGGGAAGAAGCAACAAUUGAUGUC  
>mmu\_piR\_012275 | gb | DQ689355 | Mus\_musculus:6:127798584:127798614  
:Plus  
UGUUACCUUCAAUAAGACACGACUCGAUGC  
>mmu\_piR\_022112 | gb | DQ703918 | Mus\_musculus:10:75303245:75303275:  
Plus  
UAGUUGAUGUAGACCCUGAGAAAUGAAAGC  
>mmu\_piR\_004656 | gb | DQ553715 | Mus\_musculus:2:92392317:92392347:P

lus  
UGGCAAGGUUCCCUACACCCCUAAACUUUAC  
>mmu\_piR\_015171|gb|DQ693699|Mus\_musculus:9:54082086:54082116:P  
lus  
UACCACAUUCAUGGUACAUGCCACUAGCACC  
>mmu\_piR\_028398|gb|DQ713038|Mus\_musculus:7:29845246:29845276:P  
lus  
UGUAUAAAGUGAAACGAGAUACUAAAGACAU  
>mmu\_piR\_012282|gb|DQ689365|Mus\_musculus:6:127773390:127773420  
:Plus  
UGAGUUGACCAAUAGAACCACCCUCUAGGUU  
>mmu\_piR\_039324|gb|piRNA\_3045|Mus\_musculus:7:72985147:72985177  
:Plus  
UGCAAUGGUUCACCCUACUGCUGUGAGCC  
>mmu\_piR\_009623|gb|DQ685216|Mus\_musculus:14:22944212:22944242:  
Plus  
UGCAAGAAUGUGCUGUGAAGAGAAAAGCCCU  
>mmu\_piR\_036952|gb|DQ725434|Mus\_musculus:2:92356146:92356176:P  
lus  
UGCAUGCAUAAAUUUGCCAAGGGAAUGCCA  
>mmu\_piR\_036179|gb|DQ724334|Mus\_musculus:2:150842002:150842032  
:Plus  
UAAGAUUUGUAAAUCUUCAGUAAAAGCCUCU  
>mmu\_piR\_012630|gb|DQ689893|Mus\_musculus:2:150941142:150941172  
:Minus  
UAGGUAUCCCUAAAGAAGUAACAAAGAGCUC  
>mmu\_piR\_013710|gb|DQ691545|Mus\_musculus:18:67164823:67164853:  
Minus  
UUCAGUGCGUCCAUAUAACUUUCUUUGUU  
>mmu\_piR\_036527|gb|DQ724822|Mus\_musculus:9:67536753:67536783:P  
lus  
UAAUAAGCCAUAUGCCUACCCUAUCUUUGUU  
>mmu\_piR\_039743|gb|piRNA\_512|Mus\_musculus:14:18434765:18434795  
:Minus  
UACAUUUGUGUUUUUGAAAACCAUGAGCUG  
>mmu\_piR\_030643|gb|DQ716244|Mus\_musculus:1:94824196:94824226:M  
inus  
UGGUUUUCUUUCACAUGC UAAUGCUGAUUACC  
>mmu\_piR\_022580|gb|DQ704623|Mus\_musculus:9:54028407:54028437:M  
inus  
UUACAGUACAUGAUUACUAGACAUUUGCUG  
>mmu\_piR\_020654|gb|DQ701813|Mus\_musculus:2:23328840:23328870:M  
inus  
UGAAACAAUCUGUCUUACACAUGCCUAGUCC

>mmu\_piR\_007105|gb|DQ562820|Mus\_musculus:18:67171595:67171625:  
Minus  
UUUGUGGGCCCGUGGCAAUGCAGAAAACAUC  
>mmu\_piR\_009313|gb|DQ684692|Mus\_musculus:3:35066809:35066839:P  
lus  
UCACAACCUUAGUGAACUUGUUGACGCUACC  
>mmu\_piR\_031407|gb|DQ717323|Mus\_musculus:15:59082096:59082126:  
Minus  
UGUCUCUUAGAAACCAUGAUUCUUUCCAGA  
>mmu\_piR\_022705|gb|DQ704809|Mus\_musculus:12:98799483:98799513:  
Minus  
CCCAGACUCAUUACACAAGAGUACCUGCUG  
>mmu\_piR\_029946|gb|DQ715271|Mus\_musculus:9:67508053:67508083:M  
inus  
UGAGACAAGUUGUUUGCAGAUCUUUUAGUGG  
>mmu\_piR\_011681|gb|DQ688421|Mus\_musculus:15:98368939:98368969:  
Minus  
UAAACCGUUGUUAAGUUCCUAGAACUCUG  
>mmu\_piR\_009345|gb|DQ684739|Mus\_musculus:8:113018433:113018463  
:Plus  
UGCAACGAAAAUGGUUUUGUCUCAGCAGACC  
>mmu\_piR\_013988|gb|DQ691973|Mus\_musculus:11:103259159:10325918  
9:Plus  
CCUCUAUUUAAAUCUAAACUUUACAUCAGGG  
>mmu\_piR\_009005|gb|DQ569122|Mus\_musculus:8:95080707:95080737:P  
lus  
UCACACACAGGGAUGGCUGAUGGAACCCACA  
>mmu\_piR\_013056|gb|DQ690561|Mus\_musculus:11:103251427:10325145  
7:Plus  
UAAUAUACUGAUGAUGCUCUAUAUGCAUGGG  
>mmu\_piR\_019033|gb|DQ699413|Mus\_musculus:7:69779185:69779215:M  
inus  
GACAUGGCUAAACGAUGACAGAUUGAAGAA  
>mmu\_piR\_031701|gb|DQ717746|Mus\_musculus:18:67172460:67172490:  
Minus  
UACUUGCUUAUCACAAGAUUUCCAGGCUUC  
>mmu\_piR\_035127|gb|DQ722794|Mus\_musculus:7:73666755:73666786:M  
inus  
UACAAAAGGAGAAACUGAGACUUGCUUUGUGC  
>mmu\_piR\_007434|gb|DQ563892|Mus\_musculus:6:127765451:127765482  
:Plus  
UUUUGGGUGUUUCAGUCCCUUCUCAGCUGGUC  
>mmu\_piR\_037809|gb|DQ726660|Mus\_musculus:4:57453474:57453505:M  
inus



UCCAAGGUGUAGAACGGAAAUACCCGGGAGGU  
>mmu\_piR\_002049|gb|DQ545100|Mus\_musculus:6:127801813:127801844  
:Plus  
UGAAACCGGUGAACCUAUCAGGUGCUCAUCCU  
>mmu\_piR\_008413|gb|DQ567341|Mus\_musculus:2:150837917:150837948  
:Plus  
UAGGUUGUCAUCACAUGGUAACUUCUCCUC  
>mmu\_piR\_030283|gb|DQ715746|Mus\_musculus:7:72983072:72983103:P  
lus  
UCCACGGAAUACUCCCAGCCUACAAUAUGGA  
>mmu\_piR\_036880|gb|DQ725329|Mus\_musculus:2:150941252:150941283  
:Minus  
UGGCACAUAACAUCACCCACUACACUCAUCUC  
>mmu\_piR\_014270|gb|DQ692382|Mus\_musculus:Y:1171627:1171658:Min  
us  
UAAUAAUGGUCCAUCUUGCCACAAUACAGCAG  
>mmu\_piR\_011479|gb|DQ688113|Mus\_musculus:7:73684426:73684457:M  
inus  
UAUCUAUCCCAAACUCAACAGGGAGAGUAAA  
>mmu\_piR\_031067|gb|DQ716849|Mus\_musculus:5:102074212:102074243  
:Minus  
UCCAGCCCAUAACUAGUAGAUGGAAAGCAAA  
>mmu\_piR\_020597|gb|DQ701724|Mus\_musculus:15:74474656:74474687:  
Plus  
UAGUUGGUAAAUGUAUUCUAAAUCUAGCCUC  
>mmu\_piR\_018636|gb|DQ698842|Mus\_musculus:5:150082260:150082291  
:Minus  
UAACUAAAGAGAGCUCCAAGAGUUCAAAGAGC  
>mmu\_piR\_010528|gb|DQ686662|Mus\_musculus:18:67180093:67180124:  
Minus  
AGUUGAUGUAUAUUCUGAAGACAGAGUUGGUA  
>mmu\_piR\_019906|gb|DQ700712|Mus\_musculus:17:27024689:27024720:  
Minus  
AACACAGAUUUUAAAAGUACACAUUUUUCUGG  
>mmu\_piR\_032390|gb|DQ718737|Mus\_musculus:10:127092169:12709220  
0:Plus  
UACAGGUUCGGUAAAUAGUCCAAGUUGGUC  
>mmu\_piR\_035328|gb|DQ723087|Mus\_musculus:17:27037247:27037278:  
Minus  
UAAUACAGUUGACAUUCCAUCGGUGAGACC  
>mmu\_piR\_030479|gb|DQ716023|Mus\_musculus:6:127768755:127768786  
:Plus  
UAAUAAGGCUGACUCCACAGGACUACAUUCC  
>mmu\_piR\_038111|gb|DQ727108|Mus\_musculus:2:150941869:150941900

```

:Minus
UAGGUGUCUCUUUGUGGCCAUAAAGGCAUAGUC
>mmu_piR_008296|gb|DQ566937|Mus_musculus:5:150093139:150093170
:Minus
UAGGCAGUGUGAAGAAAGGAACCGUCCGGCU
>mmu_piR_002747|gb|DQ547570|Mus_musculus:5:113565137:113565168
:Minus
UGAGGAUACUUGGACAGGUGCUUUCUGAAUGU
>mmu_piR_009670|gb|DQ685291|Mus_musculus:7:69757237:69757268:Minus
UGCAUUUUGGUCAAAACAAUAGCUGGGUUGGU
>mmu_piR_018820|gb|DQ699117|Mus_musculus:17:27083123:27083154:Plus
UGCUCAAUAAGCUGUAGCCUAGAGUGGGCAAU
>mmu_piR_020635|gb|DQ701778|Mus_musculus:6:87958155:87958186:Minus
UGAAUAAAUAUAAACUACCAUUUUUUUAGAGU
>mmu_piR_039222|gb|piRNA_2873|Mus_musculus:7:72984429:72984460
:Plus
UCUACAACAAAUUGGACACUCACCUUCCUUG
>mmu_piR_021605|gb|DQ703162|Mus_musculus:12:98797822:98797853:Minus
UCGUAUUUCAUAGUCUCCUGUGAGACUCGAGG
>mmu_piR_012393|gb|DQ689525|Mus_musculus:10:86004988:86005019:Minus
UCCUGAUUUUGUAGGACAAGAGGCCACACU
>mmu_piR_025416|gb|DQ708727|Mus_musculus:12:98823284:98823315:Plus
UGACAGAUGCAUAUUCUGUGCCCUUUUCGCCU
>mmu_piR_038559|gb|piRNA_1521|Mus_musculus:17:27065947:27065979:Plus
UACAUCCAGAAGAGACCCAAAAGGAGAUGGGCC
>mmu_piR_038459|gb|piRNA_1326|Mus_musculus:17:27072915:27072948:Plus
UUGAAGGUAGAGAAGGUUACCCCAAUUGGGUUU

```

(3) List of 1,418 samples in  $S^-$

```

>piR_pseudo_2813
GUGUCUAAUGAAAAACAAUGAAUU
>piR_pseudo_15137
UCAGUUUUGCCGGUUGAUGACCUU
>piR_pseudo_18201
GUUACAUAGACCAUGAAUAGCGAAA
>piR_pseudo_13054

```

AAACUGUAGGUUUCUAAUAUCUUCG  
>piR\_pseudo\_1116  
CUUGAAGACUUAAGUCGUUCCAGGA  
>piR\_pseudo\_17025  
UGGUCUAUUGCGAAGAGCGUGUUGU  
>piR\_pseudo\_25665  
GGGAAGGCUCCAGGCAUUUAUGAAU  
>piR\_pseudo\_12340  
GCCUUUAGUCAUCAGCACCCCUACA  
>piR\_pseudo\_17494  
AAAUAUUGGGCCUUAUAUCUGACUUA  
>piR\_pseudo\_18889  
UUUGCCCAACAAGUUUUUGCGAAAUU  
>piR\_pseudo\_23188  
CACAUUGUUUCAUCGACAUCGACUC  
>piR\_pseudo\_5286  
GGAAAUCUGUUUAAGAUGGUUUUACA  
>piR\_pseudo\_16394  
CAAACAUGAGGACUGCAGGUAAUGUU  
>piR\_pseudo\_20320  
AGUAGCCAACGGGGCUUCCAGUAUUC  
>piR\_pseudo\_20613  
UUUUCUGCACGGGCCCUAGCUUUCGA  
>piR\_pseudo\_1220  
UCCCACAAGUCAAAUCAAGAUCUCCG  
>piR\_pseudo\_13879  
UCCACAAUAGGUUUUCCAUGAUCUCA  
>piR\_pseudo\_22360  
UCGGAUGGCAUGUGUGAUUCAUGUC  
>piR\_pseudo\_17918  
CGCACCAGACGUAGGGGGCCAAUGUU  
>piR\_pseudo\_19670  
UAAAAACGUCAAUACGGUAUAGAAA  
>piR\_pseudo\_2345  
CUCUAACACGGUUCGAUUCGAGGUAU  
>piR\_pseudo\_8842  
AUGUCAGUUUUUAGUAAGGAAGCGCA  
>piR\_pseudo\_13584  
CAUUUAGAACGGGCCACAGUUCAGCG  
>piR\_pseudo\_20559  
GCACAAAGGGUUAUGAAGGUCUUUGG  
>piR\_pseudo\_22132  
CUCUGGAGGUCCAUUUUUUAAGGUG  
>piR\_pseudo\_24328

GUAGAAUCCGUACUCCUACUCAGUU  
>piR\_pseudo\_436  
UCUGAUCUAUCGAAGAUCAGGAUCU  
>piR\_pseudo\_20410  
UCGUAGGGAAUGGAUUGAAAAACUCC  
>piR\_pseudo\_27344  
AGCAAGAGUGAGGCCAGUGUAUAA  
>piR\_pseudo\_22931  
CCAUGGAGCAGGCCUAUGUCGGUUC  
>piR\_pseudo\_13702  
AUAUUGACAAAUUUGAUUUUGUACUCG  
>piR\_pseudo\_17409  
UUUGAGUGUGACGGAGAGUCUCGCACU  
>piR\_pseudo\_5537  
AAUACUGAUGUGCUGCCACGUGGAACA  
>piR\_pseudo\_26200  
GCACAGUAGGCUUCCUACUCGAGAGUA  
>piR\_pseudo\_16806  
UAAACCCUGUAUCGAGUUAUUUGUAC  
>piR\_pseudo\_1177  
AUUUCUUCGUUUUCUGUAAAAUCACUG  
>piR\_pseudo\_14861  
UGGAAAUCUGCAUAGCUUCACCAUUA  
>piR\_pseudo\_7571  
UUCUACAUGUGGACGCGGGGGCGCGG  
>piR\_pseudo\_6406  
ACGGCACAUAUCAUAUAGGUGAAGU  
>piR\_pseudo\_15933  
GAGGUUUGCUUAUUGAAGCCAACUAU  
>piR\_pseudo\_3222  
UAGGAAUCAUUAUUAACCGGGUUAUG  
>piR\_pseudo\_19317  
GGGUGGGAUACUAGGUUUGCCAAUAGU  
>piR\_pseudo\_22378  
CGCAAUCGAUAUAGGUAAGCGAAUUUGU  
>piR\_pseudo\_12520  
GAACAUUGUACGGACAUUGGGGUUUUA  
>piR\_pseudo\_13139  
UUUGCUUUUUAGUCCAGGAUACUUGUU  
>piR\_pseudo\_22974  
CAUAGGUAUGAGUGCCGAAUCCGCCUGC  
>piR\_pseudo\_12760  
AUUGUUAAGUUAGUUGACACCGAAAUCU  
>piR\_pseudo\_11571

UCAUUGAAAUGACACUUUCGUCGACAGG  
>piR\_pseudo\_7835  
CAGGCUAUAAAAUUGAGUUGAUGGGCAC  
>piR\_pseudo\_16743  
AUGGAUACAAAUCUCGUUUUUUCUCAA  
>piR\_pseudo\_15250  
UGUUCUGGUUUGUACCUGAAUCGUUAU  
>piR\_pseudo\_2135  
UAGUAUUUGGAAAGGGCUCCCAAUUUU  
>piR\_pseudo\_24169  
UGACCACAGGAAUACGGUUGAGUAUGGG  
>piR\_pseudo\_12815  
ACUGUGUGCCGGUUGAUCAGUCAAUAGC  
>piR\_pseudo\_14371  
UUGCAAGUCGGUUCUCGUACGUCCGGC  
>piR\_pseudo\_15761  
GAGACAUAGGGAUCGUUGGUCUUCGUUA  
>piR\_pseudo\_2142  
UCUUCAAAAGAAUCCGAAGGCUGGUUAU  
>piR\_pseudo\_19926  
CGUUACCACGAGUUGAGGGUCAUUUGCG  
>piR\_pseudo\_14412  
GAGCAUGUUGGUUAGCCUAAACACGAUA  
>piR\_pseudo\_2499  
UCCUGCAGGCUUUUGUAGGCCCGAGUGA  
>piR\_pseudo\_20901  
CCGUGCCGGCGCAGGAGCUGAUUUGGC  
>piR\_pseudo\_23557  
GGGAAUUGAGAGGCAGGUUGCUUGAGC  
>piR\_pseudo\_25639  
AUUGGGACACUGUAUAAAUUCUGAGUAG  
>piR\_pseudo\_13378  
GACGAGCUCCUAGCCACCGUCUCCAUG  
>piR\_pseudo\_16577  
CUUAUAUUAUCUCAAUACAUAUUAU  
>piR\_pseudo\_12963  
AAUCGUCCAUGCCAGGCUUAGCUACAU  
>piR\_pseudo\_16821  
GGCCUCGAGUUUGACGUUCCUAGUAGAG  
>piR\_pseudo\_8786  
GGUUACGUCUCGGGGCCAAGCCCGCACC  
>piR\_pseudo\_1766  
UAUUCGCGGGUAGUGAUAAUCGGCGUU  
>piR\_pseudo\_14526

GUGGCCGGUAUGGGUCUCAGGUCUUUCC  
>piR\_pseudo\_22981  
UUACUGGGGUCACCUAAGUCUGGGUAGU  
>piR\_pseudo\_12899  
GGAGAGGAUGUUGGGCAACUAUAGACCA  
>piR\_pseudo\_26249  
UGGCCGUCAGCCCCUGCGUAUUGGGAGC  
>piR\_pseudo\_20187  
AGCGCGGUCAGGCGAAGGAGGGAUUGUC  
>piR\_pseudo\_26340  
UGAUUUACUUGUGGUGUUUCUGUGUGUG  
>piR\_pseudo\_22177  
AACUGGUAAGCAGGAAUCAGGACCUACG  
>piR\_pseudo\_23679  
GCAUGUAAGCUGUCCUGGUGCCUUCGGG  
>piR\_pseudo\_13072  
UCUAAUAGUCAUGAUGACUCGCGUUGGA  
>piR\_pseudo\_20321  
UUGCAAUAAUGCGCAGGCACAGUCGAUC  
>piR\_pseudo\_3920  
UCCCGCAUUGUUAUCAUAACCACUAAAG  
>piR\_pseudo\_18865  
UGCACAACUCCUGAUUAGACUAAGUCUG  
>piR\_pseudo\_15026  
AACUUUACACAUAUAGGAUAACUGAGCUA  
>piR\_pseudo\_14697  
GUUGGGAUUAACCUCUACGAGGGCUACA  
>piR\_pseudo\_11833  
UUGGGCACAUUCAGGCGAAUCUAAUCCC  
>piR\_pseudo\_6769  
GUAUUCUCGAAUUAACCUAAGCUGGACCG  
>piR\_pseudo\_16615  
AGUUUAUACCAAGGUUAGCUUACAUCGCA  
>piR\_pseudo\_18234  
UCCAAACUUGCGAUUUAUCCUUGUACUAU  
>piR\_pseudo\_22856  
UAUCUUCAUUUUCUUUCAUAGAAUUA  
>piR\_pseudo\_23995  
CGUGUCUAACCGGCGUCGUUAUGUUCAU  
>piR\_pseudo\_14043  
GGGUUACGGCGUAAAGCACAACGGUCCC  
>piR\_pseudo\_19225  
AUACUGGCCUAGCGACUCGGUUUCAUAA  
>piR\_pseudo\_1058

UUUGGAAUUGUAAGUUUAGUGUUCAUAU  
>piR\_pseudo\_9605  
CGUGCGUAAUACAGUUUUGUGCUAACGC  
>piR\_pseudo\_20291  
GUCCGUAAACGAAGUGUCUGACACAUUC  
>piR\_pseudo\_10008  
GUUAGCGUAGGAUACGCUCAAAUGGAAA  
>piR\_pseudo\_20384  
AAUGUUUCCAAUAUUUGUACCUAUACUG  
>piR\_pseudo\_8500  
ACUCUUACUAACGCGAUUGUUGACAAG  
>piR\_pseudo\_18072  
GCGACCCGCUCUUCUGAUCGUGUAAUCA  
>piR\_pseudo\_17355  
AUAGAUCUAAUAUUUCCCGUCCUUUA  
>piR\_pseudo\_12749  
GCUAUCUUAGACAUUGCGUAGUUUGAAU  
>piR\_pseudo\_14606  
CCGCGCCAUGGUCACUUACGUUGUGUUC  
>piR\_pseudo\_20748  
AACUAUGAUAUACGUGGGUUAUAGACAC  
>piR\_pseudo\_20635  
GGUUGCAAGCCCACCAUGGCUAGACCCCG  
>piR\_pseudo\_25515  
CGAGGUGCUUAGGAAACCGAGUGCGGGUA  
>piR\_pseudo\_20069  
UAUAAUUGUACUAUAUUGAUGACAAAGAG  
>piR\_pseudo\_16336  
ACCCGGCUGGCGGGCGGACCGUACAUCA  
>piR\_pseudo\_17362  
AGGGGAUAAUCUGCCUAUGUUUAUAGCUU  
>piR\_pseudo\_9191  
GUGGUACACUGACGGUGCGACGCUAGUGG  
>piR\_pseudo\_8009  
UACUUAAUGAGAUAAAGCAACCCCGUCGU  
>piR\_pseudo\_16796  
GCCGAUAUUCGGUUGGGCACGGUGGUCAG  
>piR\_pseudo\_21311  
GUCGCCGUAUCCGGCCGCCUGGUAGCGC  
>piR\_pseudo\_16805  
GAGUUGUUUGCCAGUGCCAAAACGGUGUA  
>piR\_pseudo\_19732  
CGUUGAUUGUCUGUCGGCUUCGUGUCUUA  
>piR\_pseudo\_11455

GCUACCUGAUCGGUAUACAAUUAUUAUGG  
>piR\_pseudo\_20066  
GGUGGGUCCACUCAGCCCAUACCGCAAU  
>piR\_pseudo\_24717  
GGACCAGACACACUGCUAGGAGCGUCAGC  
>piR\_pseudo\_6494  
GUUUACAUAUAUACUCGAUUCAGGUUCGC  
>piR\_pseudo\_5899  
CGCAUCCGGCCUAUUGCUUGUACUUUGUC  
>piR\_pseudo\_27902  
UCGUUCAUGUAUACUGGUUCACAGGCCUC  
>piR\_pseudo\_19325  
AAAUCUUCAACCGAGGUGGUAUCCUGGGC  
>piR\_pseudo\_9441  
CCGGACGAGACUCGAUUGACAGUCCAGCA  
>piR\_pseudo\_21705  
AGAUUGUGUAGGAUAACAGGCUUAACUAC  
>piR\_pseudo\_21091  
CUAACAAUAAAACUCCUAAGCAUUUAGU  
>piR\_pseudo\_21910  
UAAAGAACCCCUUAUAAGAGGUCGGUAAG  
>piR\_pseudo\_15597  
UAUUCUGUGGUUACUAGAUACAUAACGGU  
>piR\_pseudo\_27784  
CAACGCCGGCUCUGGUCUGUAGACACCUG  
>piR\_pseudo\_16912  
UACGAUUAUCAUAGGGUUUUUGUCGGCA  
>piR\_pseudo\_27363  
AGGAACGGAAACAUGUAUCUGAUAGACAU  
>piR\_pseudo\_24756  
UCAUACCUCGUCGCAGAGGAGCUUUCAGG  
>piR\_pseudo\_13424  
CUUCUGACGCCGGUGUGGCAUGUCUGUGC  
>piR\_pseudo\_23574  
AAACCACGGAUCCCAACUGGUGUGUUUU  
>piR\_pseudo\_15605  
CGGGCGUAAGUGGUCGUGGCGUAGCACAC  
>piR\_pseudo\_23888  
GUAGGUCGUCGCUCAUCUACAAUUAACCA  
>piR\_pseudo\_22315  
CGGUGAUACCUGUUUGAGGUCUUGACCCU  
>piR\_pseudo\_7567  
GUACUACCUAUGACGCGGGUACUUCUACG  
>piR\_pseudo\_23632



GCCUGUCCACUGAACCAGCGCCGUUACA  
>piR\_pseudo\_26123  
GUUCUACAGUUAAGGUGCAGGCCAAGCC  
>piR\_pseudo\_26270  
UUUCAUCUAGUUAAGGUUUGCCCAUUAGC  
>piR\_pseudo\_26629  
GGCUUACUGCCCGGUCCCGCACGGGCGCC  
>piR\_pseudo\_14456  
CCUGUAGGUAUCAUAAGCUUCAGAUAAUC  
>piR\_pseudo\_8461  
ACCGCUGUGGAAUUA AAAACCCUCUGGGUU  
>piR\_pseudo\_11539  
CGCAGGCUGUGCGCAUGCCCACUUAGCUU  
>piR\_pseudo\_10580  
UAUCCUGCGAUUACAGGGCUACACUGCCC  
>piR\_pseudo\_14974  
AGUGACUUUCUCACACGGAGAAAGGGUG  
>piR\_pseudo\_2620  
CGAAAACUUGAUAGUCUAUUAACGAUGUA  
>piR\_pseudo\_17462  
CUGCCGGGCGUUGCAAGAUACUUCAGAGC  
>piR\_pseudo\_12910  
UGCCCUGUACUGCUUGGCGGACAUUCUAU  
>piR\_pseudo\_24127  
CCGCCUUUAUCCCUACCAGUCGACAUUAG  
>piR\_pseudo\_18056  
GCAACCUUCUUGUGGGCGAUUCGAAUUCU  
>piR\_pseudo\_1520  
CGGCUUGGCUUUCUAUUUUGGUCAUUUGA  
>piR\_pseudo\_18134  
AGAUAGAUUUAACAGGCGCUUUUCAGUA  
>piR\_pseudo\_27575  
UUUGAGAAUACGUUAAGACCAACCCGCA  
>piR\_pseudo\_1173  
UAGUAUAUGGGAACUUAUCAAUUUCAC  
>piR\_pseudo\_18925  
GCUGUUGUCCAUGGGGAUACGGCACGGCC  
>piR\_pseudo\_17700  
GGAGUGCGCGGGUGCGCCGUGCGGAGCC  
>piR\_pseudo\_22817  
GGCGUAUGCUAAAAUUACUGAUGACUGCU  
>piR\_pseudo\_16434  
AUUACAACGUUCUUUCAGACCCAUUGAGC  
>piR\_pseudo\_27418

UACUACAGCCCUAUUUGUGGGUCGUUCCU  
>piR\_pseudo\_19893  
CGGUCCGAGCAGACGAAUUGUCCAACCCC  
>piR\_pseudo\_24682  
GGCUAUUCCUAUGGCUGGACUGGCUUUUA  
>piR\_pseudo\_27514  
UUUAUCUUAUGAUAGCUCGUGAGAAGCGA  
>piR\_pseudo\_20771  
CAGAUGGGGCUGUUUCGAUUCAAGUAUUAU  
>piR\_pseudo\_27596  
CUCUGCAAUAGCGGUCGGUAGUCGGUCCA  
>piR\_pseudo\_2902  
UACACCCGUAGUUCGGCUAGGACGACAAG  
>piR\_pseudo\_23124  
GCACUUUCCUGAGUCCCGGACAGGCUAGU  
>piR\_pseudo\_3192  
CCGCGAAGGUCCAUGACGAGGUAUGUUUA  
>piR\_pseudo\_10606  
ACGCCUUAACCCGAAACUGCUAGGAAUA  
>piR\_pseudo\_15748  
UCGUUUCAUGAGAAAUACUUUGUUUCAA  
>piR\_pseudo\_12566  
ACCCAAUAUAUAGCAAUUGCCAACUAUU  
>piR\_pseudo\_12866  
ACUUACGUACAUCAUUAAGAUAGUAGAA  
>piR\_pseudo\_9620  
AGCAUCAUUGCGUUUCCAGGCCUCAGCGC  
>piR\_pseudo\_6073  
AAGGUUCUCACAGAUACCUCACUGUAGCA  
>piR\_pseudo\_3784  
AGGAACACACAUCCUAAGGGUUGUCCUGU  
>piR\_pseudo\_14719  
AUUCCAGAAGGCAGGGUCGAUGCACACCC  
>piR\_pseudo\_27465  
UGUUCGUGUAGGGUGGGAUGACAGUAGUG  
>piR\_pseudo\_207  
CCGUCGUCUGCGUGGCUUAUUGAUGAUGU  
>piR\_pseudo\_24185  
UAUCGCGCGUUCUAAAAGGUACGGCUCGA  
>piR\_pseudo\_24924  
UAACUUUCGAUGAUUACUUCAUUUCGGUU  
>piR\_pseudo\_23824  
CUCGGACUAAAAAUUCGCCAGAUACAUU  
>piR\_pseudo\_16657

ACGUUGGUUGGAGCUACAGUCGAACUAUG  
>piR\_pseudo\_3296  
CGGAAGCCAAUCGGACGACGUGAUCCGCG  
>piR\_pseudo\_11699  
UUUUUCAUGCAUGUAAUAGAAUAAAAC  
>piR\_pseudo\_18847  
ACAUCAUCUUUAUUCGCGUUAUCC  
>piR\_pseudo\_22872  
CAUUUCAGAUCCCCGUUGGGGCGCGUCA  
>piR\_pseudo\_19935  
AUGCUGACAGGAGACCUACCUAUUGCUCU  
>piR\_pseudo\_19784  
CCGAUGGUACUUAGCGGUUCGUCCUACGC  
>piR\_pseudo\_47  
GAGCAACAACUAUGGACACUUCGUGCCAA  
>piR\_pseudo\_1492  
GGGGCUGCCCAGCUACCUAGUGUGUCCCC  
>piR\_pseudo\_9299  
AUGAACGCUACUCGUCUUGUAAUGAUGAC  
>piR\_pseudo\_16160  
GCGGCGCCUAAAAGGGUUUGGUUAACAU  
>piR\_pseudo\_21824  
AUUUACGCUUGGAUAGUGGGCCAUCUCCA  
>piR\_pseudo\_12601  
AGCGCCAUUAGGUGUGUCUUGGGGUGAG  
>piR\_pseudo\_23483  
UGGACAGUCUAGUUUUUUUGUUGUUGCGC  
>piR\_pseudo\_7679  
AUGUUAAGUUAGCUUCUUGACCCCGUUUU  
>piR\_pseudo\_13701  
UCUGUAAUCGCGCCCGAAUUAUAACCUUA  
>piR\_pseudo\_23645  
AGAAUUCGUUUGAGAAUAGUCUGGAAUU  
>piR\_pseudo\_6749  
AAGCCUGGCUAGGGGUGUGCUUUUACUAG  
>piR\_pseudo\_7795  
AAAUGGGAUGCGGUCAACGGGCUUAGGUA  
>piR\_pseudo\_23115  
UGGAAAACGCACAAGUCUAGCAGCAUACA  
>piR\_pseudo\_22479  
CACGACUGUAUGUGCACGAACGUGGAAAU  
>piR\_pseudo\_21173  
AUCUUCGACGGACCUUCAUGAGUGAUUA  
>piR\_pseudo\_21886

UUGUGAAAUACAUCUUUAUUAUUAUUA  
>piR\_pseudo\_26437  
GCGCUCGCUACUAGACCUAUGCUUCACC  
>piR\_pseudo\_23098  
CCUCCUUUAUGUUUGAAGGACGAACGCA  
>piR\_pseudo\_11932  
UAUAAACUCGCCAGGUUGAAACAUAACCGA  
>piR\_pseudo\_5815  
UCCGACCUGACCCGGUCAUAUAGUGCCUG  
>piR\_pseudo\_24646  
CCUCCGCCGCGCCGUUCGGCUCGGUGGGU  
>piR\_pseudo\_18892  
UGCGAAGUGAGCGUUUAGCAUCAUAAC  
>piR\_pseudo\_18346  
UGUAGGUCCAUGAUUAUUCUGACAGAU  
>piR\_pseudo\_21225  
UACGUUAAUUGCCAUGAUUUGUUUAUCCC  
>piR\_pseudo\_7807  
UCCCCGGCUUUCGCAGACCGUUUCAUGA  
>piR\_pseudo\_126  
AGAUUUUUCUUACUUAUUCGAGGCUAUGC  
>piR\_pseudo\_27462  
AUGUGGAUUUGGGCGUGUAAAAACGCGA  
>piR\_pseudo\_21858  
AUAAGUAGCAAUAAACUCAUCCAAGGUAU  
>piR\_pseudo\_27249  
UAACUUUAUCCGAGGUUAGUACUGCUUAA  
>piR\_pseudo\_15705  
GAGACCGAACAGGCUCUAAUUUUUAUAGA  
>piR\_pseudo\_20442  
AGUGUCCCUACCUACUGUUAUGUGGACU  
>piR\_pseudo\_6908  
AAUAUCUUCUUUUGGUAGUGGUUCCAAAU  
>piR\_pseudo\_12680  
CAGUAUAUCAGGGCUUUUAAAUAACGAUA  
>piR\_pseudo\_23985  
GGAUUUAUGUUGACCGUCCUGCAAUCUG  
>piR\_pseudo\_15638  
CAGUAUCGUGUGAGACAGCCGAGGCUCUC  
>piR\_pseudo\_13333  
UACCUCGGGUGGUAACCUUAUUAUUGCGG  
>piR\_pseudo\_20886  
UAUAUUGUAAAAGAUGUGUUUGCGAAUGGC  
>piR\_pseudo\_18392

ACCGCCUAAAGCACGUUAUGCGCACCUC  
>piR\_pseudo\_297  
CCGAGUACAUGUAUUAUUAUGCGGUCAUG  
>piR\_pseudo\_24615  
GGAUUCAUUUGGACGAGUAUACAUCAUC  
>piR\_pseudo\_14936  
GGCAACUUUCGGCCACGGGAUGAUCGCG  
>piR\_pseudo\_25268  
CCUUUGUUAAGCCAAUAAAUAUCCAUCA  
>piR\_pseudo\_19539  
UAUUCAUAUUACUGAAAAAGAUGCGAAGC  
>piR\_pseudo\_18619  
AGAAGAAACAAGUUCACGGACACGAUCGA  
>piR\_pseudo\_23516  
UAAUCAUUUUAGAAGAAUCAAAUUUAUU  
>piR\_pseudo\_25219  
GCGAUGUGCCCGUCCCCGCUUCCGAGGCU  
>piR\_pseudo\_3310  
UGUGGGAUUCGGGAUUGCCCCUGUGCUU  
>piR\_pseudo\_23248  
AUUGGCUUCAGGAUGUAAAAGUAUUGGGU  
>piR\_pseudo\_15808  
CAUCGAGCCUACGUAACUCAAAUGGCUAC  
>piR\_pseudo\_23598  
GAGUAUCAGAGUUCUGGGCCUUUCAAGA  
>piR\_pseudo\_24336  
UGCACUCUCGGGACAUAAACGUUAUUAUGG  
>piR\_pseudo\_5627  
UGCACCUUUUCCUGGACCGGCCAUGCUG  
>piR\_pseudo\_26580  
UUGAGAAAUGCCUAAGGCGUAUCAUUGCU  
>piR\_pseudo\_3644  
AAACAUUUAAAACACGACGUAGACAGGUU  
>piR\_pseudo\_23709  
GAGACUGGAAUUUAUGAUCUAACGGAUUG  
>piR\_pseudo\_2218  
CUCAGCCACACGCGGGAGCCGAUGCAUUU  
>piR\_pseudo\_21974  
CUAUGUACCUACAUAAGGUAAUAAUUGUC  
>piR\_pseudo\_16490  
ACACUGUACAGAUUAUUGACUUCGGGCAC  
>piR\_pseudo\_13257  
UGUGACGUGUAAAGUUACGAGGUUCGAA  
>piR\_pseudo\_19712

AUAAUCUCCAUAUGGUUGCACUAAUUGG  
>piR\_pseudo\_23315  
GUGCGGCGAGAGUGUAGCUGCUAGAUGGA  
>piR\_pseudo\_12789  
UGGUAAUAAAAGCUUGGGUCCCUUCUCGA  
>piR\_pseudo\_22561  
UGGCUCACCAACAGAUGGGACAAGCGGUC  
>piR\_pseudo\_9374  
ACGCACAACCUCUGCAGGUCUAGUUGUUG  
>piR\_pseudo\_7169  
CAUUGUCACCCAGUCGCCUUUACAUUGUA  
>piR\_pseudo\_20614  
GUGGACAAGGCGAGAUCGCUUGUCAAGAA  
>piR\_pseudo\_21357  
UGGCUCUUUGUGUGAAAGGUCUUAUGUUA  
>piR\_pseudo\_24355  
UGCGAAAUUGAUUGCCUGCGUAUUUACGU  
>piR\_pseudo\_17261  
UUAAAGGCUGUUGAAUCAAAAAGUUAGCGA  
>piR\_pseudo\_17920  
UUCUCCCGUUUCUAGGACGCGUGCCCUCC  
>piR\_pseudo\_18316  
UGUAUUCGGAAGGACUCAAUACUAAUCAU  
>piR\_pseudo\_14488  
CCAACCUCUUGUUUGGUUUAGAUGGUAGU  
>piR\_pseudo\_16370  
GGCCUCUUUAUAGCCAUUGUCGAACCUAA  
>piR\_pseudo\_4045  
UCGACUAUAUUAUCAAACGUGUAUAAAAU  
>piR\_pseudo\_27681  
UUCGAAACGUUCGCAAUAGCGAAUGUUAU  
>piR\_pseudo\_9458  
UAACCGUAAAUGGAGGACCGCUCACGCCU  
>piR\_pseudo\_19474  
UAGUAAUCCCGAAGUGCUAUUAAAGACGG  
>piR\_pseudo\_25392  
UUUUCACGGUAUCGAUUCUGACUAAUUUA  
>piR\_pseudo\_23965  
AUUAGCAAGCGCUCUACUCAUGUGGCCAU  
>piR\_pseudo\_105  
AUUUAAUAGUACAAGACGAGGGUCUGUUU  
>piR\_pseudo\_17029  
UGGUAAUGGGCGCAUGGUAGGCAAUAGUC  
>piR\_pseudo\_21255

GGGCUAUCCCCUCAGUUCGCGGGACUGA  
>piR\_pseudo\_26368  
UUAGAAUGGUUUUGGAUGGACUAUUCGUA  
>piR\_pseudo\_20759  
CUCGCGGCUACCCCGCUCGUAGGUUGUC  
>piR\_pseudo\_3889  
ACUGGCCAGAAAUGGAGACUGUAGGGAUU  
>piR\_pseudo\_3906  
GUCCGUGAGUGGCGCUGAGUAUAGUUAUA  
>piR\_pseudo\_1862  
CCCUAUGGUAAUGAAUUGUUUGUCGAAAA  
>piR\_pseudo\_25291  
UGUUGACUCGGGAACCCGGUCACGCUCUA  
>piR\_pseudo\_22400  
UGAUGUUCACACAAGGGGAGUAUUGGCG  
>piR\_pseudo\_1808  
UAUGCCCCGGGCCUUUCUCGUGCUUGAAU  
>piR\_pseudo\_15351  
GAGCUUCGCAUAUGUUCGAGGACUAAUUG  
>piR\_pseudo\_8882  
CAUGUAACAACUAAACCUUUUUGGAUGUG  
>piR\_pseudo\_17580  
AGCUGCAAGAAGGGGGUCGGCCUUUUGGG  
>piR\_pseudo\_16408  
ACUGAGUUUCGCGAAUCCUCCUUUCUGGU  
>piR\_pseudo\_9204  
GAGCCCCAGUCACAUCCGGCCGUGGGACG  
>piR\_pseudo\_118  
GGUCAGACGCUAACACGGACUUGUUUCUA  
>piR\_pseudo\_12901  
GGAUGGUGAUUGCCAAGGUCAUGCCAAAA  
>piR\_pseudo\_20542  
GAAUGCCGACCAGCCGUUGGUCUCCCCAG  
>piR\_pseudo\_883  
UUGACACAGCCAAGUAAUGUCUUGUGCAU  
>piR\_pseudo\_25832  
CGGUGUGAGCCCCGUGGCCUGCGGAAUAU  
>piR\_pseudo\_26574  
CGCGGAAGAUUGAUUAGUCUUAACCGCG  
>piR\_pseudo\_12109  
CAAUUUAGUCAGAGUAUUUAUUAUUAUA  
>piR\_pseudo\_8556  
ACACAGUGCGUUUCUAUCAGAUCUACAC  
>piR\_pseudo\_21777

UCCAAUUUUAAACCUCUCUAAUUCGACGU  
>piR\_pseudo\_343  
AGAGAAUCCUAGAGCCCCGAGGCGCAUG  
>piR\_pseudo\_20709  
GAUAUUAUCGAAAUUUGGCUUCCAGAU  
>piR\_pseudo\_8372  
AAUACGGAAGUACCUAUCUUAUAGAGAGA  
>piR\_pseudo\_12137  
GGGCGGCGCGUCGGUAGCGCCAACGUCGC  
>piR\_pseudo\_4930  
GUGGAGGUUCCUCUUGAAUGGACCCUGUC  
>piR\_pseudo\_14066  
UAGUUCUAUUGACGCAGUUGUCGUCGAGG  
>piR\_pseudo\_15585  
CCGUAACCAGGUUUGAGAAGCAACAUUUC  
>piR\_pseudo\_17446  
ACUAUCGGUCUAUCGACGCUGGUGUGUUG  
>piR\_pseudo\_15668  
UAAGACACUGAAUUCGCCAGCACAGUGUU  
>piR\_pseudo\_10058  
UUUGAUUUGACUAAAGACUGAGACCAAGA  
>piR\_pseudo\_2848  
AGGUGGCAUUGUUUGUCGGCCAGCCAU  
>piR\_pseudo\_3849  
GUCAAUCUCCUCCGACCGAGCUCAGUAAG  
>piR\_pseudo\_14472  
UUAUUGGAUAUUCAAGUUUAUUCUGUAAU  
>piR\_pseudo\_25950  
GCGAUUAUUCUGACGUCCGGGCCGAGUU  
>piR\_pseudo\_21088  
UUUCGGCAUACGCCUUGGCUGUGUUAUCC  
>piR\_pseudo\_7674  
UAGUCUACGGACUUGUCCCUUGGGGCGUA  
>piR\_pseudo\_10550  
CUCGAUUCAAGUUGUGUGUAUCGAAUUU  
>piR\_pseudo\_22898  
UAAGAACUUUCUGUUGGGCCUACGCUGUA  
>piR\_pseudo\_2784  
AAUUUCCAUUCAGGCAACCGCGACGGUG  
>piR\_pseudo\_22029  
UAUGUCAUUGUAAGAUUACUUUUUUCGC  
>piR\_pseudo\_23034  
GAGCAGCUAUGAUUAAUAUCUACCGAAAA  
>piR\_pseudo\_16571



UGGCCAAGCAACGUCUUUUGGCCUACGUC  
>piR\_pseudo\_6712  
AGCGUAAAUUGUUAUGUUAGGGACUGAUA  
>piR\_pseudo\_8425  
CAGGUAAAUGUUGCAGCAUUAUCUUAACU  
>piR\_pseudo\_6569  
UGAUUUAGUGAUCCAGACUGUCUCCCGAC  
>piR\_pseudo\_3207  
UUGUUUAUAGAUGAAUUGAUUGGUGAGGCC  
>piR\_pseudo\_19343  
CGUUCUCUGAUUAUCCAGGAACUGAGUCA  
>piR\_pseudo\_18013  
AGCUAAUCAAUUUAUGCUGAUGUGGUAUU  
>piR\_pseudo\_17793  
ACGAAUGUACCGAUACGUAGGAAGGUGUG  
>piR\_pseudo\_23019  
ACCUGCGGCAAAGCUAUUGUGUGAGUCGG  
>piR\_pseudo\_13566  
AUAUAUACUAAAAAGAUUAAUUAUAAGG  
>piR\_pseudo\_21139  
CUGUACAUAAGAGGUAAUGUCAAAUAUAA  
>piR\_pseudo\_26363  
UGUCCAGCCUCCCCUUUCCCGGAGGGUU  
>piR\_pseudo\_27231  
UUUACGAAAGACUGUUGUUUCUGUGACUU  
>piR\_pseudo\_23094  
AUGCCACUCGUGUAAUUUGUGUUUAAAA  
>piR\_pseudo\_12509  
GAUCGUUAGUAUUUAACCAGAUGAGCGGA  
>piR\_pseudo\_725  
GACUUAGGAGAUACCCAUACGUCCAGUUG  
>piR\_pseudo\_7857  
UCCGUAAAUUGUAGUACAUCAUUCUUUCU  
>piR\_pseudo\_14526  
AUGCCACAUAAGAUCCGGAAUUAUGCGAAC  
>piR\_pseudo\_22704  
AAGCUUUAACCGUAAAACUAGAACUAGU  
>piR\_pseudo\_26282  
GGAUACUUUACUCGAAUUAACCGAAAAUG  
>piR\_pseudo\_19061  
GCUACUCCAAUGCGAGCACAGGGCGUGUG  
>piR\_pseudo\_24869  
UAGAGAGUCCACUUAGUCUAAAACUGAA  
>piR\_pseudo\_16231

GCAAUAGCUACCACAUACCACUGUUUCUU  
>piR\_pseudo\_14109  
AUAUAUAGGGGUUUAUGUGUGAGACAUU  
>piR\_pseudo\_16028  
UCCCAAUCUUUAUAUGGUUCAUAUUAUG  
>piR\_pseudo\_27324  
AAAUGUCUUUGUGUCCAGACUAUACUAGC  
>piR\_pseudo\_14261  
GAUGCUUCUAUGAUAAGGUUGGAGGAUUG  
>piR\_pseudo\_9943  
AGGUCGACGCCCAUUUGUUCACCUACCUG  
>piR\_pseudo\_13420  
UCGGGUGGAGUACGUCCAGAGACACUAAA  
>piR\_pseudo\_19418  
UUCACGCUCUGGCGCGAUACCUGUCCGGA  
>piR\_pseudo\_25119  
CUUUGCCGUGACCAUAUGGUCUUACCUGA  
>piR\_pseudo\_17154  
UGGUUUGACGUGUAUAUGAGCUCUUAAGU  
>piR\_pseudo\_829  
GCAGUAUUGUGCGCCGAAUCAGUUAGCAC  
>piR\_pseudo\_10151  
AAGCCACUCGAUUGGGUGUUAAAUCGGUC  
>piR\_pseudo\_14622  
GUUUUAUCCGCAGUCGUCAGGCAUGCCAG  
>piR\_pseudo\_16294  
CGGGUCGACCGAUAUGCCAGCAGCUGGAU  
>piR\_pseudo\_18023  
ACUGGUUCCCUGAAGAAACCGAAAACCU  
>piR\_pseudo\_13592  
CGAAAGAUUUAAGUCGACUCCAGAAAUGA  
>piR\_pseudo\_2449  
UUUUGCGCGUCAAAUUACGUAUCGGGUAU  
>piR\_pseudo\_3248  
AACCCACUAUUGACUACUUUAUUCUUUGU  
>piR\_pseudo\_24138  
AAACUUAUACGGUACCAUAUGACAAACCU  
>piR\_pseudo\_2751  
AAAGAUGAAGAUUUCGUUGGUACGAGUGA  
>piR\_pseudo\_19226  
UCUAGCGUUUAGGCGGUCCGGCCCUUGGC  
>piR\_pseudo\_6647  
CUCGAUAAACUUCUAGUAGCUCGUAGAAG  
>piR\_pseudo\_124

CUUACCGACAGAAUUACUGGUCAGCCAUU  
>piR\_pseudo\_17647  
AAGUUUGUGGUUGCCCUGUCGAAGCGAGA  
>piR\_pseudo\_9245  
AGUCAACCGUCACUGAACACUCUAGUUAA  
>piR\_pseudo\_340  
ACUAACACCAAUCUUCGCGUACGAGCUCA  
>piR\_pseudo\_15648  
ACAGCGGUUAGUUCUGUGCGGGUGCUGAA  
>piR\_pseudo\_19209  
GUUGCCCAAGACGGCUAAUAUUACGAGUA  
>piR\_pseudo\_9477  
GAAGGUGACCCAGCUGACCUGCUCAGUCU  
>piR\_pseudo\_546  
UAUAACAAAAAGCAAACUAAGGGGAAAGG  
>piR\_pseudo\_12509  
UUA AUGGCAAUGCUGUUGACUGCAGUUUU  
>piR\_pseudo\_22196  
UUGGCCUGUCGCCUUAUGUCACGGCAUU  
>piR\_pseudo\_18075  
GUGGGUGGAAAGCCUGGUUUCGAACCCGA  
>piR\_pseudo\_8087  
GACUCUUCGAACGUAGUAAUCAUAAUGA  
>piR\_pseudo\_21331  
GAACCUCAUUGAGCCGCUUCGUGUUCAC  
>piR\_pseudo\_25870  
AGCAGGUAAGGGCCUGAUGGCGGAUGGCG  
>piR\_pseudo\_26169  
CCAGUGGCAAGCUCUUUAUGAAGGUCUGG  
>piR\_pseudo\_25239  
AGCUUAGGACAUAACCUGGGUUAGGCCAA  
>piR\_pseudo\_3682  
GUGUCCCAAACGCUGGUUGGUGGGAUGUA  
>piR\_pseudo\_14046  
UGAGAAGGAGUUAGACGCCUAACUCAGAC  
>piR\_pseudo\_19713  
UCUUCACAGAUUAUCAUACUAUUAGUGGGA  
>piR\_pseudo\_14140  
CCCCGCACCCGCGACGUGCGGGUCCGACU  
>piR\_pseudo\_23293  
UAGCAGUCGACGGCAUUCGUCCCUACAAU  
>piR\_pseudo\_22605  
CAUAGUGCGGAGCCAAAUCUUAUCGAAUA  
>piR\_pseudo\_21512

UGCAUUAUAGCCGGCUACCGCCCCGUG  
>piR\_pseudo\_9563  
GGCGUGACUAUCGGGCCAAGUUUCUAUUA  
>piR\_pseudo\_3005  
AGAAUACGACGAGUAAUAUAAAAGAAGCG  
>piR\_pseudo\_22498  
AUUAUAAUUUUCGGCGUUUUUGGUGGUGG  
>piR\_pseudo\_24352  
GUGUUUCUAAGCGGAUACGUGUCGUUUGG  
>piR\_pseudo\_2963  
GAUUCGCUGUGUGCUCGCCUACUCCGCCA  
>piR\_pseudo\_1329  
CACGUGUCCUCCGUCACUUAUUUAUUUA  
>piR\_pseudo\_2805  
UUAGGUCCGAAAAACAAUAAAGAAAGAU  
>piR\_pseudo\_12493  
CGAUAGGCAAGCGAAUAGCAGGGAGGAAU  
>piR\_pseudo\_14736  
CGGGAAACUGUCCGAUACCGUUAAGUCUG  
>piR\_pseudo\_18122  
UACUGGUCAGGCAUCUGUUAGAAUGGGGG  
>piR\_pseudo\_17132  
GUGAUGAAUAUAAUUUUCAUUUAUUGC  
>piR\_pseudo\_20243  
UAGAUGCCUUAUAGACGAUACAGGGCGUC  
>piR\_pseudo\_15329  
CGAUCACGGACGAACUGGGGUCCGGUUCA  
>piR\_pseudo\_25323  
GCACUGGCACCCCGGCUCGGGCGGGUCGC  
>piR\_pseudo\_1164  
AUCUGUAUCACAGCGUGCGUCCCGUACAA  
>piR\_pseudo\_9339  
AGGGAUCCUGUGUUGAGCAAUGUCCCAA  
>piR\_pseudo\_12666  
UUCUAUAGGUUGAGGACGUUUUUAUAGAA  
>piR\_pseudo\_11453  
CAGACCAGUAGUGAGCGGACGACUGUGCG  
>piR\_pseudo\_22735  
UUUGUGUGCUCGUCUCUGCGGAAGCUCUU  
>piR\_pseudo\_8289  
UGUGGUGAUGUAGGGUGGAUCACUAUGUA  
>piR\_pseudo\_4723  
GUUUACAUCAGGUUGCGUGUGUAGCACCU  
>piR\_pseudo\_17825

AUGAUACGUAUAUGUUGGUUAAAUUGAUU  
>piR\_pseudo\_22491  
CCAGGUCGUUAGAAAUUACGAACCUCGC  
>piR\_pseudo\_297  
GUCCUCAGUUUGGGCGUAGGGGUAAACU  
>piR\_pseudo\_21481  
AAAAGGCUGAUUAAAUCUGACAACCUAUG  
>piR\_pseudo\_11590  
CUAGGAUCACUAGGACCUUUUAAGUACGU  
>piR\_pseudo\_26850  
UGCUAUACAUAUAGACCGAGUAUGUGAAU  
>piR\_pseudo\_25309  
GUUCGCAGGACCAAGGUGCGAGCGUCCCC  
>piR\_pseudo\_6988  
ACACAAACUAGCAAAGUGUGAAAGCAAGU  
>piR\_pseudo\_13524  
AUUAAAUAUAUAAAUAAGCCUAGCUUAA  
>piR\_pseudo\_12733  
ACUGCAUUCAGCGUCUAACCGAGGAUUGG  
>piR\_pseudo\_25705  
AACUACCAUCGGCGGUGACCGAAUCUAUU  
>piR\_pseudo\_6639  
CUGAAAAAUGUAACGAUCGCAUUAGUUGU  
>piR\_pseudo\_13116  
AGUUGUCAGGGGACAUUAUAGUGGACAUU  
>piR\_pseudo\_27082  
GCACUCAAUUAGCGUUUGAGGGCUCCGAG  
>piR\_pseudo\_6143  
CGCAUCUAUUGCCUACAUAUCGUGAU  
>piR\_pseudo\_11822  
UAGGGUUCACCGGUACAUGGCCUUAUCGG  
>piR\_pseudo\_2574  
UCCCCUCCGACCAAGGUGAGCUUUCACAU  
>piR\_pseudo\_13040  
GAAGUUGCAAUAGAUAGUGAGUAUUUAUC  
>piR\_pseudo\_1168  
GGUUCUGAACAAAGUAAGAAUACGUGCAGC  
>piR\_pseudo\_12021  
GGAGCGCGGUAGGAACUCAUCUAUGAGGA  
>piR\_pseudo\_20448  
CCGGGAGGAGAGAAUCUACUAAAAGGCGU  
>piR\_pseudo\_13183  
UGCCAACCUAGCAUGCACUUUCGUCUGCG  
>piR\_pseudo\_9747

UAAGGCAAUAUAUUUAAAAAUCGUAUU  
>piR\_pseudo\_6499  
CAUUUGGAAACAUAUUUAUCAUAACCAGG  
>piR\_pseudo\_18151  
AGGUGUUGACGGACGUCCGGUCUUGGGUC  
>piR\_pseudo\_23148  
CUGGAGCUUGUCCAUGUAAAGGCCACAAG  
>piR\_pseudo\_20970  
CGAUCUCGUAAGUAUGCACACAGUUUGU  
>piR\_pseudo\_15393  
GCCCUAUUCCAUUUCUUCUAGUUCAGGUG  
>piR\_pseudo\_17026  
UCCAGUGAAUGCGCCGGGAUGGGCUCGCG  
>piR\_pseudo\_24245  
GAGGCACAAUCAGGGGUCGAGGCGCCGCU  
>piR\_pseudo\_437  
CGUACACAUGAUUUACAAGAUAUGUCAC  
>piR\_pseudo\_2627  
CUAAACUUAGAAAUACAAUGUGUGGACCA  
>piR\_pseudo\_3506  
UGCUGCGCUAACAGGCCUCAUCCGAAA  
>piR\_pseudo\_19761  
CGGGGUACUGCCUCCACCUACGUGAGGAA  
>piR\_pseudo\_10306  
GUGUUGCUGGUGUUACCUUUGGCAUGAAA  
>piR\_pseudo\_27305  
AUUAUCGUUCAUCUUGAGAAGAUUCCUA  
>piR\_pseudo\_1  
ACGGAGCCCAGACUACGGCCAUUUAGCCC  
>piR\_pseudo\_14000  
GGCUCGAAGAAAUGCCGAUUUCUAGCGG  
>piR\_pseudo\_23741  
UGAAUGUGAGUGGCCUUUCCUUGACAAGG  
>piR\_pseudo\_13247  
UAACCUGAAACUUAUUCUCAGUUUAAAUA  
>piR\_pseudo\_7379  
CAAAGAUCGGCGAAGUCACGGUGUAUACG  
>piR\_pseudo\_3305  
AGUAACUAAUCCUAGUCUAUGGUUUUUAUC  
>piR\_pseudo\_27007  
AUUAUUCGCCUUAUCUAUAUGGUUAAGUA  
>piR\_pseudo\_396  
GCAAAAACCAUAGCUUGGGUAUCAUGAUA  
>piR\_pseudo\_19472

GGUAUCAUCCUAUCGUUUAGUGACAUG  
>piR\_pseudo\_8418  
CCACGCUCCCGUCGAUCGUUUCGGGGCG  
>piR\_pseudo\_22758  
CCGGUAGCACCGUAUCGUUUGGAUAAUU  
>piR\_pseudo\_25634  
UGGUGCUGCGAAGUCUCAGUUUGUAAA  
>piR\_pseudo\_15113  
ACACGCCGUAGAUAUAGUUUGUUAUG  
>piR\_pseudo\_3371  
CUGCGUAUGGCACUUAGCGCACGGAGCGA  
>piR\_pseudo\_9846  
AAUAUGCGUGAGCUCCCGAUCUGGGGUAU  
>piR\_pseudo\_9879  
UCAUAACUUCUACUUAGUAACUAUCCUA  
>piR\_pseudo\_24155  
GUCCCGUCAAGUAAAUACCCAUCCACUG  
>piR\_pseudo\_11956  
GGUUGUGGCGAUUAGCAUAGGAUCGAGGU  
>piR\_pseudo\_15394  
GUUGGAUGCUAGGAGCCAGAAGACAUACG  
>piR\_pseudo\_3465  
GCACACCCAGGCUCCAGUCAUACAUCGGG  
>piR\_pseudo\_23008  
UGUAAUCAACAAGAGAGUUCAGUUUUGUC  
>piR\_pseudo\_129  
CAGAUUGGCUGGACGCGUAGGCCGACUUU  
>piR\_pseudo\_22835  
CCGCUCUUUAUCUAUCUGAUUGCUCUCUC  
>piR\_pseudo\_17164  
UAAGCGAUUUGACGAUGACGAUGUACUAA  
>piR\_pseudo\_17646  
UAUUUCUGGUUGAUGAUCGUUUACGUGCU  
>piR\_pseudo\_27033  
UUCUUCUCUCUUUGGUAUACAGUUCGCU  
>piR\_pseudo\_22524  
UGGGUAACUAAUGCUUUUAAUACCUGUG  
>piR\_pseudo\_24961  
CUGGUUGAAACUACUCUCACCAAUUGGAG  
>piR\_pseudo\_255  
GUAGGAGGGUUUGGCACGACUCGUACGGG  
>piR\_pseudo\_13337  
GACGUAAAUCAAACUACCUUUAGUGGAG  
>piR\_pseudo\_19107

GGUGUACUAAUGUUUAUUGGUCAGAUAGGC  
>piR\_pseudo\_15261  
CGGCAAAGGCAGCUAGUAUACUUUUAAUG  
>piR\_pseudo\_20911  
CCAUCCCAUGGCGCAUCCUUCGGCUUGA  
>piR\_pseudo\_23116  
UCUUCACCUUUGAUAAAGAAUUGUUUUGGU  
>piR\_pseudo\_16442  
UCUCUACCCUCGUGCGACCAGGGCGCCCC  
>piR\_pseudo\_8536  
UGCUAUGGUUGGUAAGAGGUUACUUGCGU  
>piR\_pseudo\_23843  
UAAUCUCGUAUGUAGCAAGGCAUUUUACU  
>piR\_pseudo\_23976  
AUGCGAAUGCAUGGACUUGAUCCAAAACC  
>piR\_pseudo\_9604  
CCUGUUCGAAUCCGCGUUGGAUGCUUGG  
>piR\_pseudo\_1317  
ACGCACCCGGAAGGAUCAGCCGCCACAUI  
>piR\_pseudo\_16860  
AGAGAUGCCCGUUCUACGAAGCAAUAACA  
>piR\_pseudo\_20760  
UUUUCGCACAAGCGGAGGUGUAGGAGUUG  
>piR\_pseudo\_7661  
GUUGCAUUUUUUCAGAAAAUGUCCUAU  
>piR\_pseudo\_22839  
GCGUUUCACCCAAGCUGGAUUGAAGUCUG  
>piR\_pseudo\_19743  
CAGUGGAUGCUGAAAUGUCCGUUGUUUGU  
>piR\_pseudo\_15524  
AGAGGGCACGGGUUCGGUAAAUUCAGAU  
>piR\_pseudo\_642  
CAGGGGUGUAAACAGUAAUUGGAGAGACAG  
>piR\_pseudo\_11471  
AAAUACUGCUCCUAAUUUUUCUGUUGUUA  
>piR\_pseudo\_22083  
GUCUCUUCGGAACUCUAUGUUGCAGUGGG  
>piR\_pseudo\_23539  
GGCUAUCGGAUCGGGAUCAGCUGACCGG  
>piR\_pseudo\_20520  
CAGAGAUAGUGCAGAUGGUGUACCCGAAG  
>piR\_pseudo\_10130  
AGGUCCCAAUCGAAAACGUUUUUUUAAAC  
>piR\_pseudo\_20191



CGGGCUAGAACUAUCAAGCUGGUCUUAAC  
>piR\_pseudo\_23555  
AGCCUCUUAAGUACAAAACCGGCUGCCUU  
>piR\_pseudo\_13747  
UAAUAUAAUCCAGGUCGAUUCGCAGUAU  
>piR\_pseudo\_22309  
UUACUAAUCCUCAUUAUAGUUUUUAACCG  
>piR\_pseudo\_23621  
AGCGUCCAUAUUGAAUUGCAGGAUU  
>piR\_pseudo\_9709  
ACGGCUUAGGGUCCGCGGCGGAAGAUUC  
>piR\_pseudo\_5067  
ACCGACCGAUGCCUGCUUAUUUCGUAGAG  
>piR\_pseudo\_26933  
GAUAAGGGAAGUCAUUCAGGAAUGUUA  
>piR\_pseudo\_13562  
GCCUGAGGAUUUCUAGUCCUUGGUUAUA  
>piR\_pseudo\_9811  
UUGUAAAUUUCUCUGUACAUAUAAGAUU  
>piR\_pseudo\_20388  
CGACUCCACCUGUAGCACGCGCAGCAG  
>piR\_pseudo\_23190  
GAUAUUAUGCCGGUGGAAGUUAUCUCCCC  
>piR\_pseudo\_1150  
UGUUGAUCGUUCUAGACACUGCUCUUGU  
>piR\_pseudo\_571  
AGAACAAAAGAUUACGUUUGUACGUUGUU  
>piR\_pseudo\_8051  
UGUUGUUUUGUCGGCAGCACUUGUUACC  
>piR\_pseudo\_13691  
UCGAUUAUAUGGCAAAGAAUGUACUAGG  
>piR\_pseudo\_8782  
UUUAUUUGUCGCCAAUAUCCUGUGUCCAU  
>piR\_pseudo\_13441  
CGGGCUGCUGGUGCUAUAACGCCGUCGGG  
>piR\_pseudo\_15127  
ACUAAUGGUUUUUUUACGUCUGUAAAAA  
>piR\_pseudo\_21787  
UGGGGUCCUGUAGGCCUUGCGUCCCCGUC  
>piR\_pseudo\_9762  
GCAAUUCGAGGCGGACCUAACACCGGCAG  
>piR\_pseudo\_18561  
UGAUUGUAUUUGUGAUUACUUUAUACUG  
>piR\_pseudo\_11328

UCGUAACUACUACAUGGAUCCUGCAUCAA  
>piR\_pseudo\_25123  
AGCGAGGUAAAAUCCGUCUCACCUAGAUC  
>piR\_pseudo\_22050  
UUCUCGGGAGUUUCCAGUAUAACUGGUU  
>piR\_pseudo\_25836  
UGUGUUGCCUGCUCUAACGAGGUGUACCU  
>piR\_pseudo\_17090  
UCGGACGACUAGUUUUAUAAGACCGGUU  
>piR\_pseudo\_7918  
AGUGAUAGCCGUACCGAAACCACCCUCGU  
>piR\_pseudo\_24913  
AAAAUAUGUUCGGCCAGAUCGCAUCUUUGA  
>piR\_pseudo\_486  
GCCUAGGGCGGUACUUCUGGCCCUUAAGU  
>piR\_pseudo\_12077  
UUAGUAGCUACUUUAUGACUGUCGUCCC  
>piR\_pseudo\_19464  
AUUGCUUUAUUCGAUGGACCAGCAGGUUU  
>piR\_pseudo\_21469  
GUUGUUAUUUUUAAGUCUUUCAGGGUACA  
>piR\_pseudo\_17676  
AAGUGCUUGGCAUCCUCCGUCGUAGUACU  
>piR\_pseudo\_10423  
UGCGAACUCAUAUAACGGAUGAUAAUUGA  
>piR\_pseudo\_25173  
GCUAGUGGGGUGCUUAAGGCAGCACCAAUC  
>piR\_pseudo\_14363  
UUUUGUUGCACAAUGAUUUCCGACGCUUU  
>piR\_pseudo\_11958  
GCCCAGUCGCGGGGGGACUGCGUCGAGGCA  
>piR\_pseudo\_26409  
CGCUGAUUCAGUCAUGCCGGGUCGUGAGGA  
>piR\_pseudo\_12682  
AGGUCACUUCCGUCUGUUACGACACUCUU  
>piR\_pseudo\_721  
GUUAUAUUUAGCUAAUAGAAGACAGACUGA  
>piR\_pseudo\_8047  
CUACAGGUAAUUCUAUUAUGAAGAUCUCC  
>piR\_pseudo\_15916  
GAACUGCCGGGCCUGAUUAGAGGCAUAUUC  
>piR\_pseudo\_11317  
UGUAGCAGUGUAUGUCUUAGCGAUAGAAUU  
>piR\_pseudo\_14518

CAGCGGAUGGGGACCAGGGGCGACCGUGGG  
>piR\_pseudo\_13536  
GCAGUUUUUACUAAAACCACCUGGUAGGUC  
>piR\_pseudo\_6656  
UGUUUCGCUAAGUCUAUUAGCUACUGAGCG  
>piR\_pseudo\_12616  
UCAAGUCAUUCUAAUAUAUCCUGCAAGGC  
>piR\_pseudo\_19691  
GGUUAGUGUAAAUAUUUGGAUGGAAAUCGU  
>piR\_pseudo\_25342  
GCAAGUAAAUAACUUGACUUUACGAAGU  
>piR\_pseudo\_25912  
ACUAGCGUGUGACGCCAUGCAUCGUAUUGC  
>piR\_pseudo\_415  
AUGUAAGUUAACUCUUUGCUUAUAUCAGAG  
>piR\_pseudo\_3727  
GCUUCUAAAACUAUUGGUGAUAAUCAACU  
>piR\_pseudo\_369  
AUCGCAAUUUUUGGCAGUAGCCUUCGUAA  
>piR\_pseudo\_27578  
UAGUGUGGGACACUCAUCAGACAGAACAAC  
>piR\_pseudo\_19414  
UGAGGGUUGGGGGCGUAGGCUAUUCCAUC  
>piR\_pseudo\_21311  
UGGCCGAUGGACGUGGCGCCGCGGGUCGC  
>piR\_pseudo\_13064  
AACAGUCCUAGAAUAAGGCAAAUAUACCUA  
>piR\_pseudo\_1240  
UCUGAUCGUAUGACAAAUAUUUGUCCUCU  
>piR\_pseudo\_1251  
AGUUCAUCUAGAUUGCACGUUUUCGAGUCU  
>piR\_pseudo\_5249  
UGACAGACUCAACCAUACUAGAAACGAUGU  
>piR\_pseudo\_16908  
GCCAUUUUAAUACUCUGGACUGGCAAUUAC  
>piR\_pseudo\_15267  
UGGUAAUAAUUGGCCUCCUGUCCUUACGUA  
>piR\_pseudo\_25362  
CCCCGCAGCUUCGUGUGCGGAGCGCGAUC  
>piR\_pseudo\_23878  
UGCACGGAGACAUGCUGCUAAUGCCCCCU  
>piR\_pseudo\_14136  
UUUGUUAGAAAGAACAUCUAGCUCUCAA  
>piR\_pseudo\_26758

GUGGCUGAAGCGGCGGCCCCUCCACGUGC  
>piR\_pseudo\_19316  
AGGCAGGCAUGGUCGUACUACUGACUCCCC  
>piR\_pseudo\_23256  
GGAAUGUUAGGGUGUUUGUACAUUCUCACA  
>piR\_pseudo\_22631  
GAUAAUAUGUAUUAUAGGCGUGGUCUCAA  
>piR\_pseudo\_24991  
GAUUACCCAGAUGGGGGGAUGUCUGUCAUA  
>piR\_pseudo\_20400  
GAAGGUGGCACAUGCAGCGCCUAGAGUCUU  
>piR\_pseudo\_2459  
GCCGUACGCGGUGGAUCAACCCUGUUUGGU  
>piR\_pseudo\_9693  
CGUACUCACUUUUGUUUGAGGUGGGAGCGA  
>piR\_pseudo\_18613  
GACAUGUCGAGUGGCUCGAAAUUAACGU  
>piR\_pseudo\_18001  
GCAUGUAAAGGAGCAUUAGUAGCGUUGCCG  
>piR\_pseudo\_2099  
UAUUCUGAAGUCGUCCCGAUAAUUUAAUGC  
>piR\_pseudo\_13704  
UCUUAGUCUAAAGCGCAUGUUGGUCGGUUA  
>piR\_pseudo\_20449  
AACGUACUGAGCCAGCUCAUGUAGCUUCGA  
>piR\_pseudo\_25768  
CACGCGCGCCUGGCCCCGCGGGAUCGUGC  
>piR\_pseudo\_21375  
ACAGUCUUAUAGCAUGCAGACCUACUCGU  
>piR\_pseudo\_23496  
GCUCAAAACUUAUCAAGGCCAAGAUACGCA  
>piR\_pseudo\_19478  
CAAAGUGGGAGUUAGACAAGCCUUGGCUU  
>piR\_pseudo\_6433  
UCUACUGUUCUCAUGAGUGAUUUGUGACGA  
>piR\_pseudo\_24030  
GCAUAAUUACCUUAAGAGAAUACUUUACAG  
>piR\_pseudo\_16721  
UAUCAAGUCGUCAGAAGAUUAUAUGGUAUA  
>piR\_pseudo\_19539  
AGACAGAGUAGUAGGUACCCUCUUAGUAAU  
>piR\_pseudo\_2081  
AAACUGAUUGCAGCCCAUCACUGCGAUGGA  
>piR\_pseudo\_5517

CUUGUAUAGACAU AUCUCUACUACAGUCCC  
>piR\_pseudo\_16502  
AGUAGUUAAGGUUCAGCAAGGCAUUUUCAU  
>piR\_pseudo\_11358  
GUAGGUAGACAAUGAACCGUCCCUUCUCUA  
>piR\_pseudo\_26046  
UAGCACUUGGUUUCGUUGCCGCGAAUAUGC  
>piR\_pseudo\_4728  
UCUGUGGGGAUGUGGAUUUAACGAGCAUUC  
>piR\_pseudo\_25423  
CUCAUGUAUCCAAUAAUAAGUGGGAUAAAU  
>piR\_pseudo\_17326  
UCUGGGCGGGCUUUACCGAAAGCGAGGCUA  
>piR\_pseudo\_15992  
UAUGCAAGCUCCCGUAGUCAUAGCGCUGG  
>piR\_pseudo\_13843  
GACGCGCCCGCGCCCUUGAUCUGCUGGAA  
>piR\_pseudo\_22250  
AUUAAGAUUACUCGUGUGUCAAAACUUAGGU  
>piR\_pseudo\_17490  
UAUCGUACUGCUAUAGUAAAUCGCGGCUAA  
>piR\_pseudo\_9078  
UGCCAUGUGCCUGAGUGUUACACUGAUUGG  
>piR\_pseudo\_25139  
AGUGUAUACCAAGAACC UAAACGAUACAAU  
>piR\_pseudo\_13708  
UAUCUUCGCUCUCCGGGUUUGUUUGUAACG  
>piR\_pseudo\_12598  
UAAGAGGGUAAAAAUGGAAACGAUCUUAC  
>piR\_pseudo\_24410  
CGAUAAAGACGUUAGUAUCAAUCCAAACUC  
>piR\_pseudo\_15694  
CUCAGGAUUAUCCGACGUGCGCAGAAACC  
>piR\_pseudo\_5495  
GGGAGUCGUACUAUUAGGGUCUAGCUUGUC  
>piR\_pseudo\_22909  
CUUUAUCCCGUUGCACUCCGAUUCGUUAUU  
>piR\_pseudo\_8616  
CGCGGGCCGCAUCUGGUCCCGCCGGGGCAG  
>piR\_pseudo\_3403  
CGACCAGUGACGAUCUCUUGAUCUGUACUG  
>piR\_pseudo\_16855  
CUUAUCAGAAACUGAUAAAGUUAAGAGAGU  
>piR\_pseudo\_12829

ACGUCACUAAUGCUGUUGUAAUUCUCGUGU  
>piR\_pseudo\_25472  
CAUAGCACAGGUGGUCUUUUCUGUCCAAAU  
>piR\_pseudo\_18039  
GCUACUCUUGAGGAUGCUGUAUGUGAUCGG  
>piR\_pseudo\_23432  
UUUAUUAGAGUGUUUCCUCUUGGUUCCAUI  
>piR\_pseudo\_7847  
CUUUGAUCAAUACAAUACCCUUUUCUGGUC  
>piR\_pseudo\_19366  
AGGGUGACUCAAGCUACGGCAAUAGUUUG  
>piR\_pseudo\_16851  
UAGUCUAUCUAGUUGC UAAAAAGGCGGCAG  
>piR\_pseudo\_1683  
UCAAACUACACACUAGGGGAGAAUGUAAUA  
>piR\_pseudo\_23835  
UAGGACUAACCUGGGCCCUCGUUUAGGUCA  
>piR\_pseudo\_19622  
AGUGAAUAACUAGCUAUCUUCGCCAGUAUG  
>piR\_pseudo\_2165  
CAAGUGUUGAUGUGUCAGAAAAGUCACUGU  
>piR\_pseudo\_27448  
UAGAUGGCUUCCACAUCGAUUGUCCUGGAG  
>piR\_pseudo\_4933  
UCCGUUCCUGCUCUUUGAAUCUACAGGGU  
>piR\_pseudo\_24091  
GCUCCGAGGCUGCCCACGUAUGACGUUGGC  
>piR\_pseudo\_568  
GGGAAGUGGGCAGCGUCAUUCGCGGUGGUC  
>piR\_pseudo\_25405  
UUAUUAAACCAGUUAGACUUAAGAGAUCU  
>piR\_pseudo\_10214  
CCAAGUGCUACA UAAAUGGAUCUACUUUUA  
>piR\_pseudo\_26099  
ACACGAAGACGAGUCUCGGCGCUGGGUGGA  
>piR\_pseudo\_22077  
AACGAUUCGUUAGAGUAUGGCAUAAAGUAG  
>piR\_pseudo\_16758  
CGCAAUCCUACCGCCACCAUACUCGUCCCA  
>piR\_pseudo\_19934  
AAAUCUUGUGGUGUUUAGCUAAGUUCAAAUI  
>piR\_pseudo\_11705  
AUUAGUUUCCCCUACCUGCUUUGACCAGA  
>piR\_pseudo\_3512

CAACCCUCGCAGCCAUUGCAGGAGUUACCG  
>piR\_pseudo\_22950  
AUGAUUGGCAUGAAACGUCAAAACGAUUUA  
>piR\_pseudo\_15225  
GUCCCAAGCGGUCACUUCAUUCGAAAGUUG  
>piR\_pseudo\_14046  
GUGACUUCUCACUCCAAUACCCACAAUGUC  
>piR\_pseudo\_3353  
CUCAUUAUUCAUCGAAUUUAUCUUAUUCUA  
>piR\_pseudo\_8094  
GCCAUGGCUGACGCUACAUAUUGGUCCCGC  
>piR\_pseudo\_2826  
UACAGGCGGAAUCCUAUGAGCUCAGUCGAA  
>piR\_pseudo\_554  
UCAGCAAUCCCGUAGACUUUAGACCUACA  
>piR\_pseudo\_9877  
CCGCGAUCCACGGCUUAUGCCCCGCCUUG  
>piR\_pseudo\_18882  
UAUUCUUUUGUAUAAUAUCCUUCAUUGGGC  
>piR\_pseudo\_14425  
CAGAAGCAUAAUACUUUAGCUAAGAACGAA  
>piR\_pseudo\_21075  
GUAAGAAAAAAGGUGCACGCGGCCGGUUG  
>piR\_pseudo\_18611  
UCUAAUGUUUAUAGAGUGGUCGAUGACCGC  
>piR\_pseudo\_25096  
UGC UCCCGAAGGGCGAGUGAUGAUGACGU  
>piR\_pseudo\_6057  
AGUGUAAUGGCAGGUCUGUCUCUCAGGAA  
>piR\_pseudo\_12729  
GGAUAAUAUCAUUCGCAAUAGAUUUAAAGAU  
>piR\_pseudo\_26038  
UCGGCAGCCACAUGUGCAUGUAAUUGAAUC  
>piR\_pseudo\_8954  
CGUCAAAACCGAGUAGAACACCCGCAGAAU  
>piR\_pseudo\_9541  
ACCCAGAGGCUACUUUUAUGCUGUAGCCU  
>piR\_pseudo\_17151  
CGCAUACAAGCUUUUCAAAACGGCGUGUUAG  
>piR\_pseudo\_13138  
AUUUUUGGAAUAGAGUAAGCAGUGAGUUUU  
>piR\_pseudo\_3091  
AACAAUUGGCCUACGCUGACGGAUUACCU  
>piR\_pseudo\_22123

ACAGUUUGUAUUGUGCGUUAUAGUUUGAC  
>piR\_pseudo\_23696  
GUGUUAUCCGUGCCAUCUUUAACCAAAGUC  
>piR\_pseudo\_25189  
AGUUUCUGGCGGCACAUUUGAGGGGCUCGG  
>piR\_pseudo\_26951  
UUGACUCGAAACAAACACGGUAAGAAAAAG  
>piR\_pseudo\_8885  
GCGUUUUUCGAGUCUGGCGUCGCUUUACUA  
>piR\_pseudo\_666  
CGGUUAAUAGGAUUACUAUAGAAGAUACGA  
>piR\_pseudo\_5327  
AUCGCAGAAUAGAUUUAGUCGCCUUUCAGU  
>piR\_pseudo\_12226  
CGCGUCCGGUUGUCUCACAGGCCAGUCGAG  
>piR\_pseudo\_8416  
CACGCCUUUGUUUCUUGAGCUACAGCCCGU  
>piR\_pseudo\_16104  
AGGCGCAUGGUAUUGAUGUGUAGUCUAACU  
>piR\_pseudo\_23199  
AUAAGAUUAUUAUACCGGCACGACGGACAA  
>piR\_pseudo\_21827  
UGUGGUUAGACACCGCCAGCUGAUUUACCA  
>piR\_pseudo\_412  
AAUACAUAAGUAUAGUUUCGUUUUCAUCGA  
>piR\_pseudo\_23348  
UCUGAUUUAAUACUACGUUUCUGUCGAGUU  
>piR\_pseudo\_9203  
ACGAAGUGGAGUACUAGCAGGGCAACAAGU  
>piR\_pseudo\_14659  
AGUCUAGCUACAUGUAAGGUCGCAUUAGCC  
>piR\_pseudo\_3646  
GAGCCAGUUGCCAAAGCGGCGUUGUUAUU  
>piR\_pseudo\_5911  
GUGUAAGCUUUCAAGGGCUCAGAAGGAGUU  
>piR\_pseudo\_19454  
GUGUAGGCUAAGUGUUCAUAUAAUAGGGAG  
>piR\_pseudo\_7220  
AACUCUGGAAGUGUUGUCUAGGUGUUGCAA  
>piR\_pseudo\_11871  
CUCCUAAAUCGUGAGAAUUAGGAAGAAAAC  
>piR\_pseudo\_19827  
UUGGUUGGGAAUAAUCAGGCGAACCUGAGG  
>piR\_pseudo\_15360



UAAGCCGCCGAUAUCUAGAGACAGCAGAUU  
>piR\_pseudo\_13249  
UAUUUGGAUAAAGAUAAACAUUAUAGAAUC  
>piR\_pseudo\_20616  
UCCUCAAGCUGCCCACCCGUGGUCUGACGC  
>piR\_pseudo\_26235  
UAUUAGGCGGAUACUCGUUGAAAUUGCUGG  
>piR\_pseudo\_5549  
UGUAGUGUCAGUAGCCUACAACGGUCUCGG  
>piR\_pseudo\_25893  
GCAAUCCGAUAGUAGUAUUAAUAUGCGGA  
>piR\_pseudo\_148  
AAGUGAUUGCUGUGACAACUACGGGUGAAU  
>piR\_pseudo\_13344  
UGUACAGUCACUAUUUGACCACACGGGUGC  
>piR\_pseudo\_15707  
UCACCCCGUUAUAGUCCCUUAUGUCCAA  
>piR\_pseudo\_19398  
UGCCUACGACAAAUAUGGAAUACCGUCC  
>piR\_pseudo\_22294  
UUUUGGUGAGUAAUCAGGAAGCGCGGAUUU  
>piR\_pseudo\_19976  
UAGAUUUUAGUUGUAUCCACGUUAGCGAUA  
>piR\_pseudo\_23436  
CGAUCGGUAAUAUAUUUAAGUAAAUAU  
>piR\_pseudo\_27155  
ACCGGAAAGCGGUGGCGUCUUUCGCGUAU  
>piR\_pseudo\_3456  
UGAAGCUUCUGUAGCAGUCGCCCGUCCAU  
>piR\_pseudo\_12926  
CAACGAGGCUUCUACUAUUCUUACAGGGAC  
>piR\_pseudo\_26095  
AAUGUUCUUUAGCGAGCUUUUUUUAGUUCU  
>piR\_pseudo\_12902  
UCGAUCUUAUGCCAUUUUUAUAAGAUUAAC  
>piR\_pseudo\_17797  
CGUCUUUUUUUGAGGCGUUACCAUGGAUAG  
>piR\_pseudo\_6729  
UUUUUGUGGGUUGCCGUUGCAGAUGAAGCG  
>piR\_pseudo\_11264  
GGCAGAUGUACAUCUUGUCAUAAUAC  
>piR\_pseudo\_14346  
GCUCUAUGACAUAUGUGGUGGUACACUAGG  
>piR\_pseudo\_6853

AUAAAUCCACUUCACCAAUGCUAAGUUCU  
>piR\_pseudo\_4944  
CAUUAUGUUGUAGGUGGGGCGAGCCCAUA  
>piR\_pseudo\_9623  
AUACAAAAGUCAAGUUUAUCCCUGAAAAUU  
>piR\_pseudo\_13218  
UUUAACAUUUUACCUAAUGUGGAUAAUAGA  
>piR\_pseudo\_21913  
GCACCAUGGCAAGUACAGUUGGUAGAUUUC  
>piR\_pseudo\_22151  
CAAUCGUUUGAUCUUUUAACGUUGAGGUAG  
>piR\_pseudo\_13944  
GGCGAGAUCAGUAGAGUUCUAAAGUGAGC  
>piR\_pseudo\_22984  
UGUUUAGGACGAUUUAAGAGCUACUUACGU  
>piR\_pseudo\_23742  
CGAAUUAUGCCGUUGUAGUUGGAAGUUCUG  
>piR\_pseudo\_8707  
UCUCUUAGGUAUGCAGACUAAAUCCGUCCC  
>piR\_pseudo\_5772  
GGGAUUUCGUCCUGACGUCUGCAGUAGCUU  
>piR\_pseudo\_25167  
AUUCGAGUAGGAAGCUCGUGAAUAGUCUG  
>piR\_pseudo\_26901  
UGAGGAGAGACUUUAUCACCAUCCCCGCC  
>piR\_pseudo\_9125  
GGUGCAUUAAGUAUUACUGUCGCUCCGACC  
>piR\_pseudo\_14566  
UCUUUUGGGGAUCAUUUUUGUCAAGUACU  
>piR\_pseudo\_2776  
UUUAAAAGUAACCUCGAACUAAACAAUAGU  
>piR\_pseudo\_3558  
UGAGACGCUGGUUUAUGUUCAGGGAUCCU  
>piR\_pseudo\_5990  
UUACUAAGGGAUUCCUCACAGCUGAUGCGG  
>piR\_pseudo\_14938  
CCAGAGGACAGUUUGUCGUCAACCUGGACC  
>piR\_pseudo\_1209  
GACGGAUAGAGCGGGCCAUCCACCUUAAG  
>piR\_pseudo\_15422  
AGUCCGCUAUAUUUGUUGCUCUAAUGUC  
>piR\_pseudo\_20574  
GUCACCUAACUGAACAUCCUGAUUUCGCUU  
>piR\_pseudo\_17494

GUACAGCAGCGACACGCUAGUGAGACUAGA  
>piR\_pseudo\_9775  
GGUUUUCACAGUGCCGAUACUUGGCGACUU  
>piR\_pseudo\_21852  
UUUCUUUAGGCAAUCUAGUAAUAAAAAA  
>piR\_pseudo\_20565  
GACUCUCUCUGCGGCAUUCGAUAGGUGGAA  
>piR\_pseudo\_20785  
CGUCGCCGACGAUUGUCCGAGGAUCAGCG  
>piR\_pseudo\_22536  
CGCUGCAGACGUGCGUUCAGGUGGCCCGCC  
>piR\_pseudo\_3459  
UCGCGGCGAUUGUAGAAGAAUAAUUGAGCU  
>piR\_pseudo\_20887  
CUGGUCUUAGGUUUGGCAACAAGGCUGUCA  
>piR\_pseudo\_8022  
UCGGUUCUGUUGAAUUGAAGUGUCCCAUG  
>piR\_pseudo\_14450  
GCUACGAGUGAGAAUUGAGGACUGGGUUA  
>piR\_pseudo\_1967  
GGAGGCCGAGAGGCGGCGCUCGCCGCA  
>piR\_pseudo\_9719  
CCGGUUUACGACCUGCCAUCUUCUGUUGUU  
>piR\_pseudo\_23210  
AGAGGGUCAUACUGUCGGCGGUUCACGUUU  
>piR\_pseudo\_13330  
GUCAAUGUAGGCCCCUCCUAACAUGUAAG  
>piR\_pseudo\_20592  
GGGACGAUCAAAAUGGUGCGACGUAAGGAA  
>piR\_pseudo\_22069  
GACUUAGUGGCCUACCUUUGGCUCAUCGUG  
>piR\_pseudo\_15796  
CCCAGCUUCUAAUCCGCCCUACAAUACGG  
>piR\_pseudo\_13632  
GGUUACCUCUGUCAAUUGUCAGGUAAGUGA  
>piR\_pseudo\_262  
UCGGGCUAGUGGCGCGAUAACAGCAGUAAG  
>piR\_pseudo\_16923  
AUUAAUCGAUCGCCGUGUUUGAGUAUUUU  
>piR\_pseudo\_12746  
UUACCUGGAUUUUAAAAUCAAUAGUCAUA  
>piR\_pseudo\_17813  
GGCCGGAACGCAGCUUCAUCGCAGGAAAAU  
>piR\_pseudo\_23529

ACUGGACCGGAAUACCCAUUCCUAGCUUC  
>piR\_pseudo\_27324  
UACGCGGCUAGUCCAAUUUAUAAUAGCACU  
>piR\_pseudo\_5839  
AAGUCAUGGUGGUCUGUAGAUUAUGGGAC  
>piR\_pseudo\_17753  
UACUGACGGAAGGAUAUGCUCUUGGUGGUA  
>piR\_pseudo\_24871  
AUCCAUAUGUUCAAUCGAAGCAUGACCA  
>piR\_pseudo\_14641  
CAGAUACAAAUAAGGUCUUCGAUUUAUCAG  
>piR\_pseudo\_3073  
CCACACCCGCCAUGUAAACUACGUUA  
>piR\_pseudo\_21926  
AUCUUCGGGCACUUGGACUUGAAAUCGCC  
>piR\_pseudo\_7212  
AAGACGCGCUAUCACGAGUGGUGUAAUCGA  
>piR\_pseudo\_7397  
UAGAGUAGUCAGUGAGCAAUCCAUGAUAU  
>piR\_pseudo\_3836  
AGUAAGUAGCCACGUGAGUCAUCAUUCUA  
>piR\_pseudo\_27197  
CGGUAAUUGUAGGUCUACGACAUUCGUCA  
>piR\_pseudo\_18546  
GCAUCAGUGUUGUUCUCUUGCUGAGCGUGG  
>piR\_pseudo\_15293  
GACCCUUCAUAGAAGACCGGAGGAGACGCG  
>piR\_pseudo\_12550  
ACUUAUAUUGCCGUACACCGAGUGAGUGC  
>piR\_pseudo\_27087  
UUUUGACUCAAAGGUCACCCUAUGAAAUC  
>piR\_pseudo\_19803  
UCUAUUGGAAGCAUCGCUACAUUAUCGAGC  
>piR\_pseudo\_547  
ACCGGUGAAUCAUUGGUGAGACCUGGGUUU  
>piR\_pseudo\_5464  
UCUGGGGUGUGUCAACUUUUUGUGUACUUA  
>piR\_pseudo\_15288  
UUUUUAAGGAUACCAGUAUGACAAAGAAG  
>piR\_pseudo\_18767  
GAUAAUUAGAACGGCUACGCUAGCCCGCGU  
>piR\_pseudo\_22641  
UUGAGUGUAAACGCGCUGAGCGGGAAUCGUG  
>piR\_pseudo\_27046

UAGCUCACGUACCUGUAACGGCUUUCGACG  
>piR\_pseudo\_13180  
UUUGUUGUAGCUCUCAUGUCAAUACGAUG  
>piR\_pseudo\_14688  
GACAGACAGCGAGCUCGAAUCGGUAGGGGU  
>piR\_pseudo\_5949  
CGUGUCAUUUUUUGAGCUUGGAGCGAUGC  
>piR\_pseudo\_17027  
AUUCCGGAUCCGGCUCGUACUGACAGGAUC  
>piR\_pseudo\_2154  
AUCUUUGUUGCUCUUAGUUGAUGGUAUCAA  
>piR\_pseudo\_4701  
UAUGUGUACAUGUUGAUAAAUUUGAGCAU  
>piR\_pseudo\_15275  
AGGCAGCAGUCUAUCGGGAGGCAGUCACCG  
>piR\_pseudo\_12254  
GGACAGUAUUACUAUUUCCUUAUGAUACC  
>piR\_pseudo\_14694  
GUAUUUGAUUUUCAUCCCUGGGCAUUUUG  
>piR\_pseudo\_3767  
GAUUUGAAUAGCUAGAUACGUUGACCUCAC  
>piR\_pseudo\_21399  
ACUGACGGGUAGUAUUCGCCGUUGGAGGA  
>piR\_pseudo\_24996  
CCUUGUAAGUCGGACAGUAAUCCGCGCUU  
>piR\_pseudo\_18161  
UCUUUUAACUAAUUUGCAAACCAGCAUCUC  
>piR\_pseudo\_16551  
GUCGGUCAUUACCUCGGAUUCUAAUUAUA  
>piR\_pseudo\_27077  
UAUAGGUUGUACUCCAUUGCGAUACGUUAG  
>piR\_pseudo\_19797  
AGGAGCGGGUUAGGCGAACUUCAGAUAGU  
>piR\_pseudo\_20719  
AGUAGCAUCAAUGCCAGUAGAAGCUAACA  
>piR\_pseudo\_4788  
AAAUUUGUUAAGUAGAUUCAUGUAUGUAG  
>piR\_pseudo\_10272  
AAUGACGUGGCAAGUGAAGUACGACAGUUU  
>piR\_pseudo\_10104  
GAGGACCAAUCCAUCUGGGGAAGUCAGAC  
>piR\_pseudo\_626  
CAUGCUGUCACCUGCACUAAAUUUACUCUA  
>piR\_pseudo\_3223

AGCUGUAAGUUCACGAUACGGAUUCGACGU  
>piR\_pseudo\_5043  
AUUGACUCUCGGUCACCUGCCACGCACAAC  
>piR\_pseudo\_21095  
UUCCGAGGCCCAAGGGGUUACCAGGGAU  
>piR\_pseudo\_9556  
CUCUAGUUACGUUCCGCGGGGCGCAGUGUG  
>piR\_pseudo\_20632  
ACCAGCGCUUGACGAACCAGCCCAUUCU  
>piR\_pseudo\_12678  
UACUAGCCCCUUGCAGUACUAAUUGAAGG  
>piR\_pseudo\_20654  
ACACAGCCUAGUAUCCGCACAUCAGGGGUA  
>piR\_pseudo\_16288  
AGGGCGUUCAGUGAAGUCUACUUUGUCGGU  
>piR\_pseudo\_9766  
GCGGCUUUGACCAGGGGAAGAAUACGUUCG  
>piR\_pseudo\_10284  
GGCGUGUGGGAGGUGUUAUAGCAGCCUUGA  
>piR\_pseudo\_16397  
UAUUGAUGUCAAGGACGUUGUUGCACGCCA  
>piR\_pseudo\_19591  
UCAUGGUCGAAACUUUCUCAGGCGCGGUCU  
>piR\_pseudo\_1523  
CCGCAUUCAUAACAGCUGAAAGGUUACUAA  
>piR\_pseudo\_26355  
ACAUCCAUAAGAACCUUGUUAGGUAAUUCU  
>piR\_pseudo\_5027  
GGAGCGGCGGGGCCCGUAGCUGUUUCUAG  
>piR\_pseudo\_3541  
GUGUUGCUCAAACUUAGCUUGCUCGACAU  
>piR\_pseudo\_15264  
UGCCUCCAAGGAAGGACGUUACAGGGGUGG  
>piR\_pseudo\_9795  
UUUACGGUGUGGGUCUAUCAAAUACUGGA  
>piR\_pseudo\_5959  
AGUAGUUUAACCCGAAGCUUAGAAUUCG  
>piR\_pseudo\_12848  
GUUUUAUUGAUAGGUUCUUUGGUUAAAU  
>piR\_pseudo\_18969  
CGAUGUAAGCCAUCAUAAAUGUAUUUCCA  
>piR\_pseudo\_23812  
GAUGGGCAUCUGCCUUUUUGGAAGUGGUU  
>piR\_pseudo\_16113

UUAUGUUAGAUGUUGAGUUUAGACGCCAGU  
>piR\_pseudo\_13231  
AAGAUCUCCUAUCCCACGAUUUGAUCAUCC  
>piR\_pseudo\_14125  
GUUAGUCAGUUUGCCUCAUGGAUCAGUGUA  
>piR\_pseudo\_13055  
CAAUUACGCGCAAGCGUUGGUUGAUCUAGA  
>piR\_pseudo\_17911  
UGCGCUACAGUACAUGAUCUAUUUAUGGCG  
>piR\_pseudo\_19577  
UUGCCAGGAAUUUUGCAGUCGUGGUGAGAG  
>piR\_pseudo\_26241  
CCUCUUUAUUUGAUUAUAGGGGAUGUGAA  
>piR\_pseudo\_3133  
UUCUCGCUGGUUCUUAGCGGGACUGUCGG  
>piR\_pseudo\_25568  
UAGUAUGUACUUUCGUAGUUGAGCUGCGUG  
>piR\_pseudo\_12119  
UGGUGUGGCUGAGGGUCGGAGAGAAGCACG  
>piR\_pseudo\_18603  
CACUAUUGUGUAUUCUAAGUUGCUGAACUG  
>piR\_pseudo\_2053  
CUGUACAGAAACGGCUAUGCAUCCUGCAG  
>piR\_pseudo\_18191  
AAGUGGCGUGACGCACGUGCCGUUCGAUA  
>piR\_pseudo\_8044  
UCAGAACGACGAUUGUGAGAUGUGCCCAUU  
>piR\_pseudo\_21966  
CUGAGUCAGGCGUCUUUUGAACCCUGUUAC  
>piR\_pseudo\_3078  
CCAAACAGUAGGCCACCUUCAGUUGUUAGC  
>piR\_pseudo\_13187  
GGUGCAAUCAACGAUCAGUGGAUAUUCGAU  
>piR\_pseudo\_2954  
UUCACCUUGCAUGUCUCAUUUGCAUCUGGU  
>piR\_pseudo\_19099  
AAAGUUCUAAGACACGACACGUCGAGGUUU  
>piR\_pseudo\_24665  
UGACUACUUUCGUUUGUAUUGACGAAAGAC  
>piR\_pseudo\_26445  
AACCUGCGGCGGAUCCAAACCUGUUCAUGC  
>piR\_pseudo\_18577  
UGAGAUGAAAAUUCUGCGAAACCAAUCCAC  
>piR\_pseudo\_9283

AUUUACCCAAUUCUUCGUUUCAGUAAUCAG  
 >piR\_pseudo\_24701  
 GUUAGUUGGCGGCUUUUUUUCCGGCAAGAC  
 >piR\_pseudo\_6664  
 ACGUCCCAGAAAGCGGUUUACCUGGGGUAG  
 >piR\_pseudo\_25989  
 UUACCAGCAUAAGUGAUAACGCUAGCUCUG  
 >piR\_pseudo\_4622  
 AAUGGGCAUGGUUUUGAGUAUUUUCUCCGU  
 >piR\_pseudo\_9880  
 UCCUACGUGAAACUCUAGAUUCGUUCCUUG  
 >piR\_pseudo\_182  
 UACACUUGGGUGGUGAGCGUCCCAGAGUAC  
 >piR\_pseudo\_21408  
 AUUCGAAGACUUGGAAGCUACAGACCGUCU  
 >piR\_pseudo\_3894  
 UGUCACAUCUUUACAUAUUAUUCACCCC  
 >piR\_pseudo\_14737  
 AAACCUUCAGUUGGCUUGUAGUUUAGAUUU  
 >piR\_pseudo\_24495  
 AAGUGCAUUUGUUUGCCUACAAACUCUCG  
 >piR\_pseudo\_16985  
 AGCUUAUGAACCGCGGAUUCAUCGUCGCU  
 >piR\_pseudo\_23274  
 AAAUGUUGUGUUGCGAUUAUAUUUUUUUAU  
 >piR\_pseudo\_20332  
 CGUUGUGUUGGUCGUAUUUCCUAGUGGGAG  
 >piR\_pseudo\_2907  
 UUUUUGCAAUCUAUAUAUAACUGUUUUGUC  
 >piR\_pseudo\_15286  
 UUGUAGGCCGGGAAAUAGAACAGGGUCGAC  
 >piR\_pseudo\_24188  
 AACUAAAUGCAUUCUGGUUUCAUGUAGCAA  
 >piR\_pseudo\_25310  
 UUAUUUCAUUAUCUAUCGAGGACAAGUUGC  
 >piR\_pseudo\_23061  
 CGUAUGAGAUUGAGGCGUCGAGCCGAAUUG  
 >piR\_pseudo\_1715  
 CAUGAUCGAUUCGGUAUCAGACAAGAACGU  
 >piR\_pseudo\_10277  
 CUUAUUAAAUCCGUA AUGUUUCUGCUUGG  
 >piR\_pseudo\_26322  
 GCCCUAUCUGGGUCCGGGAGCAUCGCGAG  
 >piR\_pseudo\_18860



UGUAUGCAUCAUGGUGGUAACGACACAGG  
>piR\_pseudo\_25873  
GCCAUUCCGCCCGCAGCCGUGGAAAGUGCC  
>piR\_pseudo\_18358  
AAUUAGAAGCCAAUUUAUAUGGCGGUGGGAC  
>piR\_pseudo\_17162  
GAUGACGAAUGGAUACUUCUACUUAUAUGU  
>piR\_pseudo\_651  
UUAGGUGUCCUAAAAUUGUAUGUGGCUAG  
>piR\_pseudo\_26420  
AAUUUGAGGAACCUAUCAGGGUAAUCCCAU  
>piR\_pseudo\_1180  
UAGAAUGAGAGCUUUUGAUAAGGUUUCUCU  
>piR\_pseudo\_9316  
GACGGUUAUUCGAUGUUGCCAGCGGAAGCG  
>piR\_pseudo\_3595  
UGUAGGACAUCGUGCUCUAAUCAACGGUA  
>piR\_pseudo\_14899  
AAUACGCGAUGAUAGAUACUCACAGGCCCG  
>piR\_pseudo\_11736  
CCUUUAGGGUAGUUAGUUACGUUCGAGUCG  
>piR\_pseudo\_23441  
CGAGAUCAAGUUAGUUUACAAAUGUUUUCG  
>piR\_pseudo\_3373  
CAAAAGUUAUGAUUUCGUCUGUGACUUCAG  
>piR\_pseudo\_1235  
GGUUUCAGGUAGUGUUCGCGUGGAAGCCCA  
>piR\_pseudo\_282  
CGAGCCAGAAUCCCGACUUGGACGGGUGCG  
>piR\_pseudo\_8792  
GUCGAUAGAGUCAGCGCGGAUUUAAUUUGC  
>piR\_pseudo\_6008  
AUAGUAAAGACACUAUUUAACUUAUGUAUC  
>piR\_pseudo\_26017  
UUCAUGAUUUUCCUCGUCAACAACAUAACU  
>piR\_pseudo\_32  
GUUAAUUAAAUCUAUAGUGCCUGAUCGUAC  
>piR\_pseudo\_4075  
AGGCUGGCGACCUCUGGAACCAUAGCGAAC  
>piR\_pseudo\_20441  
AACUUCGGACCGAUGGCCCGUCGUAUACU  
>piR\_pseudo\_4675  
AGAAUAUUCAUUGGCAGAAUCCAUCUCCAU  
>piR\_pseudo\_22062

CCGUGAUGUGUAACGUAGGGUUUCAAGUC  
>piR\_pseudo\_5106  
ACUUUUCGAUGCGAUUGUUGAGAUAAUAGA  
>piR\_pseudo\_7493  
ACUUCAGAAUAUCUAAGAAGAAUUCGCUAG  
>piR\_pseudo\_4022  
GUAUAAGCACUCAGGGUCGUCUGUCUGAGU  
>piR\_pseudo\_22895  
GACUGAUGGGCUUUUUAUAACACCUAAAUG  
>piR\_pseudo\_22038  
CCGGCGAGGUGCCGAGCUGGGCCUAUUGGU  
>piR\_pseudo\_6700  
UGACUUUAAAUCAGAAGGCUCUCGAAAUAG  
>piR\_pseudo\_410  
UCACAUCCCCUCUGGGUGAAGCCACAGGU  
>piR\_pseudo\_14726  
UGGAGCUGCGCGCAUGAGCUAUAACCUAUU  
>piR\_pseudo\_20462  
GGGAAAUUUCUGUCCCUGGUACCCUGGCUU  
>piR\_pseudo\_20554  
CGCCCGGCCUCUGCGGGCCGUGUCAGGUA  
>piR\_pseudo\_24680  
UUUAGAGAGAUCUACUCAGAGGGCUCUGUA  
>piR\_pseudo\_16051  
CCUCUGCGCCUAUCAUAUAGGGCGCGGACA  
>piR\_pseudo\_25825  
AACCUUCAUUAUCCGAACCGGGUUAAGUC  
>piR\_pseudo\_11709  
CUUAUGUGGAAGGGCCCCUUUCUUCUGUC  
>piR\_pseudo\_914  
AGAGAACUGAUCCUAAGGAAUAGAUCGAA  
>piR\_pseudo\_9001  
UAUUAUUGCCACCGGUUGCGGCUUUCUGA  
>piR\_pseudo\_24657  
UAGGCAAUACGAGUGCAGGUCCUGUCCAG  
>piR\_pseudo\_21863  
AUACUGUCCAUAUCCUGAUAAGAACCA  
>piR\_pseudo\_4036  
GCGAAUAUGUUUGCAACAUCUACGCUGACA  
>piR\_pseudo\_21739  
CCUGUGGCAGAACUUGUUAUCUGGACCAAU  
>piR\_pseudo\_13533  
UCCUAUCUUAACCAGAGAAUGCGUUUCUGAU  
>piR\_pseudo\_5613

AAGAUCCGGAUAAACUAGAUCAGGGUACAU  
>piR\_pseudo\_103  
GGUAUACACUACACACUCAAUUGUUUGGU  
>piR\_pseudo\_5599  
ACCUCACAGAUGCAGCUGUCCUCCGACGG  
>piR\_pseudo\_17351  
GGCCACGGGCGCAGGCGCGUCGCAGCAG  
>piR\_pseudo\_22150  
UUGGUUAACGUACAAUAGGAGAGACCUAAA  
>piR\_pseudo\_23246  
AUCCAUUCGAAUAGGGAAAUUUAUUAGAAU  
>piR\_pseudo\_8101  
CAAUAAGACUAUACUAUUUAAAAUUUUUC  
>piR\_pseudo\_15977  
ACAUUAACAGAUACUGAAUCGCCCGGCGCA  
>piR\_pseudo\_3932  
UUAGAUGAGUCCUGACUUCGGCGUUGAUUU  
>piR\_pseudo\_3198  
AGGAGGUUGGCCUCAGCGAGGGGAGAGGUA  
>piR\_pseudo\_4568  
UCAGUUUUUUACAAGGCGAGUGCCUGCGU  
>piR\_pseudo\_26766  
AAAUCGUGUCACUGUUGAGGGUUUAUGUA  
>piR\_pseudo\_22734  
AUCGCGGAGGUUCGGUGGACUCCGGGACA  
>piR\_pseudo\_21657  
GAUUCAGUAGGUUUUAUCAACGGUCACAGCG  
>piR\_pseudo\_19461  
UCGGUAUUUGCGAUUCAGAGUGUGUGUUC  
>piR\_pseudo\_17285  
UCUAUGUCGGUUGAGGACAAUUUAUCGCA  
>piR\_pseudo\_20339  
GCCGCUAGGCCUGUCCGUCCAAGAUAAAGUC  
>piR\_pseudo\_21211  
GGUAGUCUUUAUAUCGCUUUUCCGGUGAUA  
>piR\_pseudo\_16791  
UGUCGUUGUCGCGGAUGUCCGGCCCGUUA  
>piR\_pseudo\_18690  
UGCCAUGCUUGCCGGGUUGCAGCUUGUACA  
>piR\_pseudo\_21781  
UCGUGGGUUUACUAUACAGUUGAAAUAUGU  
>piR\_pseudo\_12189  
UGGUCCGUAUUCUCGCAACCUCGCGUGCU  
>piR\_pseudo\_19042

UUGACCGGAUUUCGUAAAACGAUGGAAUGA  
>piR\_pseudo\_8945  
CUAUUACCAAGUCCAUUUGCUAUUAACAG  
>piR\_pseudo\_18163  
ACCCUGCGAAGCAGCAAUUUGCGGGUUAG  
>piR\_pseudo\_26265  
UAAGAGUAUGUGAGCUUCCAAUCGCGGUCC  
>piR\_pseudo\_4969  
AGAUUGUGUCCGUUCUCUCCUAGUGAUGU  
>piR\_pseudo\_6028  
UCCUCCGAUCAGCAGGUAAAGACCUCAAUC  
>piR\_pseudo\_3492  
AGAUAAUUAUAAAAUUAUUACUCAUAA  
>piR\_pseudo\_16329  
GACCCAAGAAGCAGCCCUUUCGUUCGGUU  
>piR\_pseudo\_4066  
CUUAGUCGAUGGUUAAAGCCAUCGGCAGA  
>piR\_pseudo\_20290  
ACGAGUGUCAUAGGUAAACGUCUUCAUCGC  
>piR\_pseudo\_23417  
UUAUAAGGCUAUGGUCUGUUAACGGCAUCC  
>piR\_pseudo\_3981  
GAAAUUUUCUGGUGUGUACCGUACUAUUGU  
>piR\_pseudo\_22263  
CCGCGAAUCUAUGCAGUGUUAAACUCCAUC  
>piR\_pseudo\_25759  
UACCAUUUCCCGGUGAAUUGUAACAGCUG  
>piR\_pseudo\_22085  
UAAUAUAUGUAAUUUGCAGUAAUUGAUUU  
>piR\_pseudo\_14929  
UAACGCUUGUCCUGCUCGAAGAAGGUUAUG  
>piR\_pseudo\_17678  
GAAUACCGUAUUGUCGCCUUACAACCCU  
>piR\_pseudo\_17035  
CAAAGUGUCGGUAGGCUGUCGGCCUGAAUC  
>piR\_pseudo\_9845  
GGUUAGUAGACGUCCUUUAUAUUCUGCAC  
>piR\_pseudo\_11832  
GUGCCCCGCGUACGGGGAACCAUCUCGGGG  
>piR\_pseudo\_26525  
GUCUUAGAUUUUAUAAAUCUUGAAGCAAUU  
>piR\_pseudo\_26806  
UAAAGAGCGCCAUAUCUUGCAAUUUCUACCC  
>piR\_pseudo\_12935

GCUACGACCAUGCAGAGCCCACUUUGCGAU  
>piR\_pseudo\_3504  
UACUCUGUCACUUGAAUUAUAAUUACUCAU  
>piR\_pseudo\_25801  
GUUACGUGACCUGAUCUUUGGGGUGCGACA  
>piR\_pseudo\_11728  
CUGUAGUCCAAUGCAGCACAACAAUACAAUC  
>piR\_pseudo\_19263  
UUCGUGGGGUGUGUCCCCAGAUUUAGCGG  
>piR\_pseudo\_24435  
CAUUCAGCUAAAAGUUUCUAGCCCACUCCU  
>piR\_pseudo\_12981  
CUCAAGGAGCUUGCGUUACAUCUGUGGU  
>piR\_pseudo\_19189  
UAUUAUUUAAUUAGUGAGACGAAUUAUU  
>piR\_pseudo\_7525  
AAUUAUUUCUGGAUUGGAGAAUACUAAUAC  
>piR\_pseudo\_3935  
AACCGUAUUAAUAACAGAGCUCUUAACAG  
>piR\_pseudo\_1916  
AGUGAUGUUUCAAACAGGUGUGUCAUUUC  
>piR\_pseudo\_13880  
GCCCGCGAGUCAGGGGGGGCGGCGUGACAC  
>piR\_pseudo\_17963  
CCAGUAUUGUCUGCUAGUAACAUGUGAAUA  
>piR\_pseudo\_9446  
UCCCGCAGCGUCAUGACGCUCACCAUUA  
>piR\_pseudo\_22670  
AGCUGUGAUUAAGUAUCCCUUGAUGUCCA  
>piR\_pseudo\_21608  
AUCAUGC UUUUAGAGUGAUUACCCCGAGU  
>piR\_pseudo\_18597  
GCAGUCGUUCCACCUCAGAGUUAGGAU  
>piR\_pseudo\_21966  
ACACUAAGAAGAGGCAGUCUAUAUGGCUUU  
>piR\_pseudo\_280  
AGAGAGUCGGUUUAGACUAGGCGUCAGCGA  
>piR\_pseudo\_16396  
UGGUCCCAUACUUGCAAGGCGGCCCGCGGU  
>piR\_pseudo\_6246  
CCCGGCUACUAAAUCCGGUGACGGGUCAC  
>piR\_pseudo\_2702  
CUUAUUUUCACAUUGUCCCCAAAGUCGCGU  
>piR\_pseudo\_22026

ACUAGAAGUCCGUGACGUACGGUACAUCAC  
>piR\_pseudo\_18081  
AGAUGGCCAGAUCUGAGUUCUAUUGUGACU  
>piR\_pseudo\_25184  
ACAGGAACUCGCCGUUCUUUCGGUAAAGAU  
>piR\_pseudo\_16033  
GCGUAAGGCCUCGUGCCUGGGAUGAAUCGU  
>piR\_pseudo\_25987  
UCUUGUUUUUAGAAUGAAGGAAACCUGAGC  
>piR\_pseudo\_14367  
AACUGUGCCGCAUGCAGUUUAUUUUUGCUG  
>piR\_pseudo\_11631  
CAGGUUACCACCAGCGGUUCUCAUCUGACG  
>piR\_pseudo\_26364  
CCCAAAGACGGUCGGGACAUGACUAUCGGA  
>piR\_pseudo\_16989  
CUUUUGCACUACACGAUGAUGGCUUGGUCG  
>piR\_pseudo\_2302  
UAUUGAAGUGCCUUGUAUGAGCCGUGGCUA  
>piR\_pseudo\_7731  
UCCUACCAUAAAACGUUAGUAUCGGUUUC  
>piR\_pseudo\_25332  
UAGUGUGGAUCACCUGUAUACAUAUCCGG  
>piR\_pseudo\_2681  
UUGAUUAGAAGCGUGCUAGAAUUUGGAACA  
>piR\_pseudo\_7664  
AUUUCAGGAGAAUCCGUCCGAAUUGCCCAG  
>piR\_pseudo\_22150  
UCUGGUUAAGUUA AUGGUACCAGUCGUAA  
>piR\_pseudo\_6344  
GUCCCCAAUGAUUAAAUUGCAAGGGUUGU  
>piR\_pseudo\_14542  
UACCUUAAGGGACCAAUUACGUGGUAAUAU  
>piR\_pseudo\_2725  
GCCAGACAAGUACCACUCCAAUUGUUUCA  
>piR\_pseudo\_5412  
AGUUUGUGGGACCAAGUUUGUCUUAAGUUA  
>piR\_pseudo\_20496  
UCUGCUGUUAUAGGCGAUUAUGAGCCGCCU  
>piR\_pseudo\_21591  
UCAAUGCUGUCCUGCAAUAGCUGUCCUA  
>piR\_pseudo\_23365  
ACACGGUCCAAUAUAUGUGGGAUUGCCCAU  
>piR\_pseudo\_21625

GAAAGACGGGCUAGGGAUGAGCAGGGAGAU  
>piR\_pseudo\_20983  
GCUGGUGAAUUACUAAUUCACAGGGUCUCC  
>piR\_pseudo\_491  
UCUAUGUUUACACAGGUAGGACGUUACUUU  
>piR\_pseudo\_20716  
AAAAUCGCUCUAGGUCCGGUGGCACUUGUA  
>piR\_pseudo\_18447  
AGUAUCAAGUCAUCCUGACCGAUUGGGAAU  
>piR\_pseudo\_20377  
GUCUUUAUUUAUAAAUUUCUUUAGAGAAC  
>piR\_pseudo\_11264  
AUAUGUCGGGUGGGCCAGUGGUGUUGGCGA  
>piR\_pseudo\_12147  
AGCUGGGUUGUCGUUAUUCUCUCCGGUACC  
>piR\_pseudo\_15425  
GUGUGCUUAAACCGGCGGGUGUAAGAUAA  
>piR\_pseudo\_6976  
AUGUGCAGAGGUCUAGUCCUAGCUAGAUG  
>piR\_pseudo\_22076  
CGAGUAAGUUGCACUCUCACGGCAAGUAGA  
>piR\_pseudo\_6295  
UUUUUAUCUUGCCACACACCUUCAUGACUA  
>piR\_pseudo\_5080  
GAGCCCGCAGGGUGGGCGGGCGCAUGCAACC  
>piR\_pseudo\_550  
AGUAGGGUUGCGCACACUGUGCAUAACAAC  
>piR\_pseudo\_4513  
UGUUUUUAUCAGGUCGCCUCCUCCAGCGG  
>piR\_pseudo\_27103  
GAGGAAGAGGUAUGGAGCGACAACUUGAUG  
>piR\_pseudo\_22511  
AAUGCAGACCGUUGUCGGGUGUGGUGGCAA  
>piR\_pseudo\_9817  
CACGUGCAGCCCUGGUCCGUUCAGAUUAUA  
>piR\_pseudo\_20195  
AAAUAGAUCACCCAUCGUACGGUCCUUGGC  
>piR\_pseudo\_15468  
CGUCGUAUCCAGUUUUCGUGUGUAACCAC  
>piR\_pseudo\_12498  
UCGUUUUAUAGCUUGGAUCCAGUUUUUGGAG  
>piR\_pseudo\_24695  
UGCUCGCGAGUGGCCCGCAGAUUAACUAU  
>piR\_pseudo\_7453

CACAGACAUCGAGGCCAGAGUUUGAUUU  
>piR\_pseudo\_14711  
AUCCCUUCUUUCAUACAGGUACAUAGCUU  
>piR\_pseudo\_17900  
UGGGUAAACAGCCGGAUUUGUAGAUCGGAU  
>piR\_pseudo\_26645  
CCAAUAAUUUGGUCGUGCCAGGGCAAUUG  
>piR\_pseudo\_21204  
GGGUAGCCAGCGUCGUCUCCACGGCAUGCG  
>piR\_pseudo\_16661  
UUGGGCAACGCUAAGUUUCUUAUAGUAUGA  
>piR\_pseudo\_3665  
CGACUUUGAUGGUGUUGCUCGGCCUACACG  
>piR\_pseudo\_26125  
GGUCUUCACCACUCCGGAGCGACCGGUGG  
>piR\_pseudo\_24043  
GUAAGCGUACUAAUAAGGGAGUCCCAUC  
>piR\_pseudo\_15799  
GCUGACUCUUCGAGGGUGUAGUUUUCUACC  
>piR\_pseudo\_6639  
UCGUCUUAUGGACAGUUGUGUAAGCCUAAC  
>piR\_pseudo\_24320  
CACUAUUGUAUUAGCAUCGAUAUAGUAUCA  
>piR\_pseudo\_19518  
GUUCGGGAGACAUGACGUAUAGGUAUCUCG  
>piR\_pseudo\_14104  
UUAUCGUGUCUACGUCGACGGGUCUACCCG  
>piR\_pseudo\_25149  
ACUUUGUCAUCGAGGGAAAAUCUCUGACCG  
>piR\_pseudo\_11604  
CACUCAGAAGCUUUUCUUAUUUGAUAAGG  
>piR\_pseudo\_12952  
ACCCACCGGCCGGCGGUUGCCGGGGCCA  
>piR\_pseudo\_13247  
CUCUCCGGCACUCAGUGUGUCGAGGGUGU  
>piR\_pseudo\_3819  
GUUAUCAUCCUAGUGGACUCCUCAAGCGUG  
>piR\_pseudo\_17031  
AGCUUCGUUUGUUGAUCGGAAGAGUUCUUU  
>piR\_pseudo\_23231  
UUUUCUUUAUUCAGUUAAAACUUAUGUUAC  
>piR\_pseudo\_320  
AACAUUGUCCGUUACAGGUCGCCCCCAGA  
>piR\_pseudo\_7575



CUUACCAACUUUUAGGAUUUUCAGUCGCC  
>piR\_pseudo\_1860  
GCCCGCGGAUGUGAAACAGUGCAACAUAGA  
>piR\_pseudo\_16669  
UGAGGAAUAGCGCGCAUACGAUGUAUUGUU  
>piR\_pseudo\_23885  
UGCCCCAAAUAUAAACAACGGGCCUCUG  
>piR\_pseudo\_2864  
GCUAAUUGUACGUUAUCAGGAGGCGAUUA  
>piR\_pseudo\_3496  
CUAAUUGUGUUGUUAUGAACUUUAUUGAUG  
>piR\_pseudo\_20807  
UCCCAAACGUUGAUUCCGUUUUGUAGAAAC  
>piR\_pseudo\_24679  
GCGGUGCGGGAGCACUCAUACGGAUGUC  
>piR\_pseudo\_1501  
CCUAUGAGUCUUCUCGAAUCUGGCGUGUU  
>piR\_pseudo\_6296  
GCCCACGUGUGGAGCAUUUAUACUAGAAAC  
>piR\_pseudo\_17184  
UAACGCGAGGAAUCGCGUGCGGCGGUUCGG  
>piR\_pseudo\_24040  
UUUUAUCGCAGCCGCUCGUUACGAUUGGAC  
>piR\_pseudo\_15785  
GGACCUGGAAAGAGUAUUUUUGAACUUGAG  
>piR\_pseudo\_20962  
GCCCGGUACGGCGGACGCCGAGGCCGCUG  
>piR\_pseudo\_16405  
CUUACUUUAUAGUUGGUACCAAGUGCCGGUG  
>piR\_pseudo\_13058  
UAGUGUAUAAGCUGCGGAUGUAAAGAUGGG  
>piR\_pseudo\_215  
UCUGAGAACGUAAAGUAUUGUUCAUCAAAG  
>piR\_pseudo\_15108  
UUGGAGGAAUGCAGGCCGUUGUAUAAUAUG  
>piR\_pseudo\_26481  
UCUCUCCGUGCGUGUAAUGUUUAUUCGG  
>piR\_pseudo\_20723  
GUGAUGAAAUUGUACACUUCGGUCCCUCGG  
>piR\_pseudo\_1805  
AAUGAUUUCGUUGGUGUCAUUCGUUUUCC  
>piR\_pseudo\_20308  
UUAAUUAGUUGAUUAAUUGGUUUUAUAAAA  
>piR\_pseudo\_23627

CUGAGCCGCCGGUAGUUGGAUGUCACGGA  
>piR\_pseudo\_12047  
GGACGUGUAAAUUUAAUUGCGUAAUAGGC  
>piR\_pseudo\_22886  
UGAAUUUCAAUUAACCAAUUGAAAUUCGA  
>piR\_pseudo\_15466  
UCAAUUCUGUCGUUAUUAUUGUACACCCACGG  
>piR\_pseudo\_17672  
UGAGGAUGUUCUGUAGUAUCUACGCAAAGC  
>piR\_pseudo\_18405  
ACAAUUUGUCUGAUUGAUUGUACUUACUUAU  
>piR\_pseudo\_19345  
CUGAUCGGUAUUCUUUAGACAAGGUAUGAG  
>piR\_pseudo\_11918  
UCCGUCGUGCGUCCUGCUGACAGCCAAUCG  
>piR\_pseudo\_3285  
GCGUCUAAAUAUCUAACUUUCGGCUAUCUU  
>piR\_pseudo\_19549  
CCCAGGUGGCGUAGGCGAGUGGGUGGUUCG  
>piR\_pseudo\_26147  
AUCCGACCUUUCGGUAUUAGCGAUUUUCAC  
>piR\_pseudo\_12941  
AGAGGAUUCAUGCUGAUUGACCUCGCUGUA  
>piR\_pseudo\_24520  
AGAAUACAGUCAAUCUCAUCCAUGGACA  
>piR\_pseudo\_2743  
UUAUUGAGAAAAAUGCAGAUAAAAAGAA  
>piR\_pseudo\_3053  
AGUAUUGAUUCUCCAACAGUGAAUCUUUUG  
>piR\_pseudo\_4875  
CCCCCUCAGUUGACUAAGGCAAUACGUCC  
>piR\_pseudo\_22213  
UUGUUGACUUACAUGGAAAUAUUUGCAAU  
>piR\_pseudo\_12044  
UUGCUAUGUCCUAUUAGAUCGCGGCCGGC  
>piR\_pseudo\_2814  
GAGAAUGGCACUAUUCGAAUCCUAAUGACU  
>piR\_pseudo\_3650  
UUAUUUGAUUGUAAUAAGUUAUUUUGAAGC  
>piR\_pseudo\_11480  
ACUGGUAUCGCAGUGAAAGCCAAUACUCG  
>piR\_pseudo\_23658  
GGACAUCGUCUCCCUGGAUGGUUCCAAAA  
>piR\_pseudo\_21197

AGGUACAAAUUAUGCGCUAUCUGAAGAAGU  
>piR\_pseudo\_26061  
AGGCGUUUUCAUACGGCUUUUUAAGGACAA  
>piR\_pseudo\_7017  
AAAAAAGUAGUUAUAACUAAAUCCUCGCUG  
>piR\_pseudo\_5114  
GGCUUACUUGACACCUCCUUAUUUUGUGA  
>piR\_pseudo\_7574  
UGGGGCUCAUAAAGCGCGCCAGAACUUA  
>piR\_pseudo\_12540  
AAACAUCCUCAGGAUUUAUGGUUUGUCCGAC  
>piR\_pseudo\_20438  
UAAGGUUUUACAUAAGGUGUGUAUGCCGU  
>piR\_pseudo\_13904  
ACUAUUACAUAACGAUAACUUGUUCGCGUG  
>piR\_pseudo\_9705  
CUUUUUUGUCGGACACAUGGGUCACACUCC  
>piR\_pseudo\_6013  
CACUCACCCUCGUGUUGGUCGGAUAUCCGG  
>piR\_pseudo\_13836  
GAAGCUAGAGAGUAGAUGUAGUUGCACCCG  
>piR\_pseudo\_18928  
CUUGCUAUCGUGUUGUGCACAUGCUCGGUG  
>piR\_pseudo\_11152  
UACGCAAACAGGCCACGGUACUAAGUGU  
>piR\_pseudo\_518  
AAUUAGUCUCUCGUGAAUGAGGGGAAAAGA  
>piR\_pseudo\_17581  
CUCACUCUCGGGUAUGCAGAAAUGGUAGCC  
>piR\_pseudo\_13959  
GCGGUCCUAGUUAGCUGCACGCCAGCAG  
>piR\_pseudo\_20106  
AGGCUUCCAAAUCUGAGUAAGUGUUAAGCC  
>piR\_pseudo\_12082  
GUGCGAUUCCAGUCUACCGGCGGAAGACA  
>piR\_pseudo\_12047  
CAAAAUGGGCUUGAGUUAGAGGUAUACCU  
>piR\_pseudo\_768  
CUCCCUCGGAGAUAGGAGCGAACGCCUGU  
>piR\_pseudo\_8400  
CAAGAGCCGGCGGCUGCACUCACUCGUGCG  
>piR\_pseudo\_13293  
AAAGUAAUAAUGUUAUGUUGUACGGCGAU  
>piR\_pseudo\_1475

UAAACUACGGUUGCAUAUCCCCUACAUCU  
>piR\_pseudo\_20488  
UACGUCAGCGUUUCAGGUUUUCGUAAAACC  
>piR\_pseudo\_2922  
UACCUCAGUGGCCUCGCCCCGCCUGACC  
>piR\_pseudo\_5399  
UAUUAACGGGCGCAGAGUAUAGUUGACCCU  
>piR\_pseudo\_14092  
ACACGAUGAGGGUUACUCAAUACAUUCGAU  
>piR\_pseudo\_12032  
ACCUUGCUCUUUCUCUACAGUGCCAUC  
>piR\_pseudo\_1912  
CAGCGGGAAUCUUUUGCGGUAGUCUGGUGG  
>piR\_pseudo\_7660  
GAGUGGUCAGUAGGGCAUCACGAGAUGUUU  
>piR\_pseudo\_11178  
CUCGGUAUCCACGUGAGCUUCUUUCGUCGU  
>piR\_pseudo\_17046  
CAGCACGGCUCAUUGCCCAAGAGCGUGGAA  
>piR\_pseudo\_2965  
ACAAAGAUGAAUCAUGAGGGCAUACUUUCC  
>piR\_pseudo\_27019  
UGUGCCGGCGGCUCGCGGUGGCCGAGGUCA  
>piR\_pseudo\_3798  
GUUUAAGGAAGUGGCCUUUCGAAUUUUUAUA  
>piR\_pseudo\_1787  
UACCCACGUGGCUUGACGAUAAUAAUAUU  
>piR\_pseudo\_20949  
GAGCGCUGAUAGCUUAUAGCCUCAGUAGCC  
>piR\_pseudo\_3370  
GUGUAUGUGGACCUCGACUCGCGUUGUCA  
>piR\_pseudo\_14990  
GGUUGGGGUGCGGGGCCUUAGGGCCGCG  
>piR\_pseudo\_10303  
CCGCAAUUAACAGUGCGGCAGGUUUGCUG  
>piR\_pseudo\_22771  
CUUUCGGCGAUUGCCGAUAAUUCUUCAGU  
>piR\_pseudo\_5028  
AUGUUGUUAUGCACGCUACAUCAAGGGCAG  
>piR\_pseudo\_7758  
AAACGAUAGCAUCUUGAUCAUCCCUUUUUA  
>piR\_pseudo\_26211  
ACGGCUAACUUCGUCUACACUAACUACGUA  
>piR\_pseudo\_14172

GUGCGCCCGCGGCCCGGAACCUUACAAUCC  
>piR\_pseudo\_8382  
AGACUGAUCGAGUCGAUGUUUAACGCAAGG  
>piR\_pseudo\_8982  
CAAUGGUGGAUGUCUAUAGAACCCUGAACU  
>piR\_pseudo\_13498  
AAGUUCUGUAUAGAAGGGUUAUCCGGUAAU  
>piR\_pseudo\_21000  
UCAUUCGGAACUUUUCGGUAAUGGGUAUCA  
>piR\_pseudo\_9856  
GUCUGAACGCACAUGCAGUUAACAGACGU  
>piR\_pseudo\_13905  
CACAGCCAUCCCGUGCGGUCGCGGUGCAGA  
>piR\_pseudo\_18916  
GGUGGAUUAAGUUUUUUUGAAUGAUAGAUG  
>piR\_pseudo\_19150  
GAAGCCAUGGGUUUCGGAUUCGUCGUUUUU  
>piR\_pseudo\_11292  
AUGCACACACCUGUUGUUUCCCCUACGCC  
>piR\_pseudo\_6844  
CAUAACUUUGAACAUGUCGAGGGACCCACU  
>piR\_pseudo\_26238  
AUGCGAAGAGCCUUCUAUCCGCCUCGAGAG  
>piR\_pseudo\_20535  
AUUACCGAGAUCUUCGUGAGGUAACUGCG  
>piR\_pseudo\_12414  
GGGUGUUUCGGCAUUAUAGGACCUAGCCAC  
>piR\_pseudo\_522  
AAAGAGAAGCUCGUGUAAGCAUCCACCUAU  
>piR\_pseudo\_14679  
UAAGUGUAUCACUCGCAUACGUAAUCCAAC  
>piR\_pseudo\_16681  
GAGCCGUUUGGUCGCUAUUUAAAGGGACCGG  
>piR\_pseudo\_26635  
AUCCGGCCCGAUUUUUCUCUCGUACAUUCU  
>piR\_pseudo\_6537  
CGCUCUGUUGUUCACGUAAGUUUAUCCUG  
>piR\_pseudo\_11768  
AUCAACGAGUGCUGCCCUUGUGGGACUGCG  
>piR\_pseudo\_23287  
AGUACUUUUAUCCUGGGAUUACCAGACACG  
>piR\_pseudo\_2111  
GGCCGUUGAGCUUUUAUCAUCGCGUGUCGA  
>piR\_pseudo\_745

UUUUACUAGUAGACAAUCAUCACAAUUAGC  
>piR\_pseudo\_14499  
GUUGUCAUUUCGUGUGCUAAUGCAGAAUGGC  
>piR\_pseudo\_25233  
UAGAACUAGAUUAAAGGAAAUAUCCAAAUA  
>piR\_pseudo\_24469  
GUUAAAAGAACUUUUUAAAUUAAUACGUGU  
>piR\_pseudo\_9486  
CUACAGCAAUCCGGAACAGUGGUAAUAAUUA  
>piR\_pseudo\_7513  
ACUGGGGAUCCCCCGCGACACCGGACCCGC  
>piR\_pseudo\_21290  
GUGCUGGCGGUGCGGGCAUCCUAGGGCGAU  
>piR\_pseudo\_25905  
AACCGUUACACGUUACUACAGUAGACCUUAA  
>piR\_pseudo\_25419  
GCUAAUCAUGAUCUGGUAAGUGAAUGAUAA  
>piR\_pseudo\_1342  
UUGAUGGGUGCCUAGCGGGGAAGCAGUAAAC  
>piR\_pseudo\_14397  
UUUUAGGACAUGGCCGGAUUUAUGAACGGAA  
>piR\_pseudo\_4914  
AUGAAAGACCAAUAUAAAGUUGAGCCAAUA  
>piR\_pseudo\_14725  
CGGGGCCCAGGUUAUGGCACGUGCCUGUUUA  
>piR\_pseudo\_26199  
GCUGGAGGGAGCAUGGCCGGAAGGAGUCGUC  
>piR\_pseudo\_21449  
UUACAGAAUAUGAAGGUACGAGUUCAGUAAG  
>piR\_pseudo\_12988  
UUUUCAUUUCGUAAGAAAUUAUUUAAAAUUG  
>piR\_pseudo\_22731  
CCUAGAGCAGGCGGCGGGACAGCCACGAGCC  
>piR\_pseudo\_1432  
UUUCAAGAUUAUGGCAAAAUAUCUCCUACA  
>piR\_pseudo\_21212  
AUAGCCAACAUCACAGCGUAUGAGUCAUUUA  
>piR\_pseudo\_8834  
UUCGUAAAACGUCUUUUUAAUGGUGGGCGU  
>piR\_pseudo\_9835  
CUUUUUUAAAGGCCCAAAGUUUAUCAUCGGA  
>piR\_pseudo\_18289  
UUUACUUGCGGGCGUGUAAGAACACUGCUUG  
>piR\_pseudo\_4632

ACGGGUAGUCACGCCGUAUAAACUGGUUUUC  
>piR\_pseudo\_23221  
UUAGCGACUAUCAGGUGGCUUAGCGAAGCGA  
>piR\_pseudo\_21549  
CAUAGACGAGGUUUUCGAUUUAUUUGACGAA  
>piR\_pseudo\_14094  
AGCCAAUAAUUAAGCUCAAAGUAACUCUUGAC  
>piR\_pseudo\_7213  
CAAUGCACGAUCUUUCGCUACUUUGCCCCC  
>piR\_pseudo\_16195  
UAUAUGUGCUGCCAAGUCGAUUGAAUUGCUU  
>piR\_pseudo\_22938  
CCUGGGCCAGCCUUUGUUGGAUUGUGGCGG  
>piR\_pseudo\_11364  
CGCAUCAGUACUUACUUCGCGACAUAGUAA  
>piR\_pseudo\_26579  
UAUCUUAAGCGUAACUCUUCUUGGAAGAUAC  
>piR\_pseudo\_1081  
UAGCCCGCACCUGAAUCCCGUUGCCAUGCGG  
>piR\_pseudo\_22181  
CGCAUUACACUCUUACGCGAGGCGCGCACA  
>piR\_pseudo\_3563  
UUGGAAUAAGGUGUUUAUGCGGCUUCAAUUG  
>piR\_pseudo\_22044  
UCGGAAUGAACAGCCCUCCUAGUGAGUAGCU  
>piR\_pseudo\_10173  
UUAGACCGCAUCUUUUUUGUUUACAAUUCUG  
>piR\_pseudo\_8354  
UGUAACUCCAUUGGAUAACCCCGCAGGAUUA  
>piR\_pseudo\_17685  
UCCAUGAAGUACCGCGAGCAUUAUUUGGU  
>piR\_pseudo\_25696  
GUUCAGAACAGGAGUAAGCCCCUCGGGCGUG  
>piR\_pseudo\_16826  
AUUAUACAAUAUUGGCCGUCGGACUCUUCAU  
>piR\_pseudo\_22498  
AAAGAGGCGAUUUUAGCCGUCGGUUAUUG  
>piR\_pseudo\_6908  
CCGACAUGGGUGGCUUGACUUUCUGGGGAGC  
>piR\_pseudo\_19625  
CGGAGUAUUGUUUAGCCGUAACUACUAACGU  
>piR\_pseudo\_1248  
GGUCGUCCAUCAGCAUGUACGUUUCUAGCAC  
>piR\_pseudo\_25700

ACAGGACGAUGGAGCGGUUCUGUAUAAAAACA  
>piR\_pseudo\_6708  
AGUUACGUUGCGCAAUUUCUGAGAGGACCA  
>piR\_pseudo\_18058  
CCCUAGCGGAUCUGAUGAGUGUGGUUUUUUA  
>piR\_pseudo\_2884  
AACUAUAGUUUCUGUGUGGUUCCACGACAUG  
>piR\_pseudo\_2796  
UACGAACCGAUUAUAGAUCAUCAUAACCUUU  
>piR\_pseudo\_24767  
GGGCUUUGGUUGUACUAGUACCGAGGUUAUC  
>piR\_pseudo\_18931  
GUCAAUCGUAAGCUGCGAUGUUUGAAUCUGA  
>piR\_pseudo\_26260  
UUUCUAAUGUCACUAGGUAAAUAUAAUAUGC  
>piR\_pseudo\_24160  
AGUUUGUAUAGUAGAAAAAGAGAAAAAAAU  
>piR\_pseudo\_16482  
UGCCAUGCCGCAUAGCCAAUCGGGGGCUGGA  
>piR\_pseudo\_15199  
AAGCCUGGUGGUACACCAAUCCACUCCA  
>piR\_pseudo\_14974  
UGGUCUUCGAGUCCGCCUCAACGAUUGAUA  
>piR\_pseudo\_17440  
UUAUAGGACCACUUCUUAAGUAGGGGGUUUC  
>piR\_pseudo\_23014  
UGUAAUGUAAGAAAUUAUAAUAAAUAUAGA  
>piR\_pseudo\_14306  
CGAACCGGGUAGGCCCUUAGGGUCACACUCG  
>piR\_pseudo\_7280  
ACGGCUAGGGACUUGCCACACUGUAUCUCUG  
>piR\_pseudo\_19707  
AGCACAUAGUACAUGGUCAAAUUCCAUAUC  
>piR\_pseudo\_8883  
AGACGUGUAAGACAGCGUACUUGAGUAUUUAU  
>piR\_pseudo\_25790  
UUGAACCUACGUAGCUUUACACCUUUUGAGU  
>piR\_pseudo\_3485  
GCUUUUCACACUCCUGGUGGCCAGAAAGUC  
>piR\_pseudo\_21652  
UCCGAGGAUACUCGUUAGUGUAAGCUGAAAU  
>piR\_pseudo\_21230  
GACAUUUUAUAUACUUGCUGCGCGAAAGUG  
>piR\_pseudo\_22147



CGCGGCGUUAGCUAGUAUUCUUGGACAGUCA  
>piR\_pseudo\_22665  
GGCCCCGCGGGCGGCUCGAGGCCGUCGACGU  
>piR\_pseudo\_24406  
UUCGCGCCUAUUCUUCUGUGUACUACCGUAG  
>piR\_pseudo\_25184  
CGAUACGUGUCUUCGUGGAUCUAGCGCAGUC  
>piR\_pseudo\_8765  
AAUUUCUAGACCCCUCCGUUAGCUGGAAUGG  
>piR\_pseudo\_25926  
UCUCAUUUCUAGUAUAUUGUAUGAACCAUGG  
>piR\_pseudo\_25555  
CGUCUGUAAUGCUGUGGAUAUGUGGAUCUAA  
>piR\_pseudo\_23339  
CCUCUAAAUGACAAUGUUCGUCGGUACGGAG  
>piR\_pseudo\_25721  
ACUCGCAGUUUCCGGGUGUUCUCAUUAGAA  
>piR\_pseudo\_2619  
CAACAGCUAGUAAUUGGGCAGCGAGAAGGCC  
>piR\_pseudo\_6061  
UGGGGGUUAUUGAGAACGUCAUCGGCGACUG  
>piR\_pseudo\_19767  
ACGCGUCCACUUGCCCGUGUAGCUGGCCGAA  
>piR\_pseudo\_25372  
CAUCGAUGCCGAGUCGGGUUUACACGUUGU  
>piR\_pseudo\_18339  
CGGUAAUCUAGGGGCCCGACGUCCUGGCUUC  
>piR\_pseudo\_2895  
AGGAUGUGUAUGCUGAAUAUAAGUGGAGAAU  
>piR\_pseudo\_26036  
ACGCGAACUCACAUGCGUUGUUGCAAGGAU  
>piR\_pseudo\_24164  
GUGAUUGCAAGAGAUGAAAUAUUGUUUCGG  
>piR\_pseudo\_5669  
UAGCACUGGAUCUCAAUCGCUGUAAAGCCCA  
>piR\_pseudo\_2264  
CUUGUUACCUGCGCGCUUCGUAGGCCGGUGU  
>piR\_pseudo\_26779  
AAUGGCCUUGUAAGGGUAAUCCAACGUUA  
>piR\_pseudo\_6097  
UCGAUUCGCGAAUGAAUAUUGAAAUGUGUU  
>piR\_pseudo\_8538  
AUAUUGCCGGCUUUGGGUUGGACCCACUAG  
>piR\_pseudo\_5554

CGCUUGACCCUAAUGUAGAAGACUGGUGGAA  
>piR\_pseudo\_19227  
UAGGGAGAGGCCUUGUGGUGGGGUUAGUGU  
>piR\_pseudo\_15991  
AAUUAAGACAACUAAAUAAGGCAAUUGCCU  
>piR\_pseudo\_11818  
CCCUCAAAGUCCAACGCUGUAUUUGUUUGC  
>piR\_pseudo\_16440  
UGAUAAAUAUAACCCGCUAUUACCAGGUUA  
>piR\_pseudo\_22994  
GUCCUCACGAUCGUCUGGGGAGGUGCCGUA  
>piR\_pseudo\_18142  
CUUUUGUUUGAGUUCAUACCACUUCUGUCA  
>piR\_pseudo\_8099  
UAUGGGCUUCCGAGUAAUUUGGGCUUUGUU  
>piR\_pseudo\_2755  
GUACACCGUACAAUUUAGGAAAAUAAAAGU  
>piR\_pseudo\_22288  
UUCCCCCGUGG AUGACGUAAAGACAUUGUCC  
>piR\_pseudo\_13837  
UGCGUACAUUGGAUGGAUACCUUACAAUGCG  
>piR\_pseudo\_13335  
UCUAUAUUGAAACGGGAUAUAACAGUACCUA  
>piR\_pseudo\_19205  
CCGUUUGCAGAUUCGAUAGAUUUGCGUACCA  
>piR\_pseudo\_6264  
UGGCACAGUGCGAGUCGGGCGCAUGGGAAGU  
>piR\_pseudo\_22566  
UGAUUUAGCAUCCAGAAUGGACCGGUGGA  
>piR\_pseudo\_22650  
AAGGGUUUGAGGGCAACCGUGAUCCCAUCGC  
>piR\_pseudo\_23245  
UUCUGUACGACAGGCACGUUUUAGUUCUACG  
>piR\_pseudo\_13700  
CAAGUCCGUGUUGGCGGCGUCUCGGCUUUGA  
>piR\_pseudo\_12008  
ACAAGGAUGCACUGCCUACACGCGGGAUCCC  
>piR\_pseudo\_16278  
CCUUUUUGACUUGACGGUUCUACUGUAUUG  
>piR\_pseudo\_2481  
UCCACACGUUUUAUAUCGAUUGGUGGCCCC  
>piR\_pseudo\_20210  
UCUCCUGGCUCGGACUCGCGUUACGACUCCU  
>piR\_pseudo\_2801

AUGGCGGGAGGCUAUCAGCCGGCUGUUUCG  
>piR\_pseudo\_13537  
CAAUUUGCGGCAGUUAUGGUGAACGGAGGAC  
>piR\_pseudo\_24225  
UACGCGGGGAUUUAAACAAAACAUUGUCGCG  
>piR\_pseudo\_23954  
AUAUCUUUCUAAUUAUCUGCGUACUAAUCC  
>piR\_pseudo\_1212  
UCUUGUUCGCUGCAAUUAUGCAUUUCCAA  
>piR\_pseudo\_16307  
ACGUGUGUCCUAAUUGUUUGUGAGAGACCU  
>piR\_pseudo\_13671  
CGUCCUGUUCAAGCACCCUGGCUUCGGGGGC  
>piR\_pseudo\_7164  
UGGCAAUAUCCAGAGGUCCCUAGUAUAGUA  
>piR\_pseudo\_20916  
CUGAUUUACUACCUUUUGUGGCUAGCUAGCU  
>piR\_pseudo\_16171  
UGGGGCAGUAAAGUAUUUGUGCAAGAUCGG  
>piR\_pseudo\_5738  
ACCCGCGUUGCAAUACGGAAGGGCUUUCGCU  
>piR\_pseudo\_22744  
GGCCAACCGUGCUUACGGGCCGAUCCUCUG  
>piR\_pseudo\_23945  
CUUAUAUUUUGAUUACUCAUAAAUAUUGAU  
>piR\_pseudo\_23683  
GUAUUCUAACCCUCUAAUGGUAGGAUUUACU  
>piR\_pseudo\_22069  
GACGGUGCGCCAUGGAUACAUCGGGCACACC  
>piR\_pseudo\_25203  
GGCGAACGGGACCCCGCGGCGGGCGACCCG  
>piR\_pseudo\_20757  
GCAAGCUUCGGAAUGGCUGCUUUAGCAGGAG  
>piR\_pseudo\_15745  
AAGCCCAACGCUCGAGCAUUGGCCUGGUUAU  
>piR\_pseudo\_24253  
UGAUGUUCUGUUCGGUUUAAGGGCCGCAUUA  
>piR\_pseudo\_3510  
ACCCUAGUAUGACAACAGCAGUUGAAUACUU  
>piR\_pseudo\_6971  
UAGUUACGUUCUCUAGCUAUACGCGCAUUGG  
>piR\_pseudo\_15993  
UAAGAAUCUACUGAAGUCGCAUGACGCAUGG  
>piR\_pseudo\_1656

ACACAGUAGGGUGCAGUGGUAGAGCUGAUUAU  
>piR\_pseudo\_6113  
UCUACUAUCAUGAACACAAAUCAUAUUCAUU  
>piR\_pseudo\_8925  
AGUAGUUAGGUCGAGAUUGUACCGCUGGAUU  
>piR\_pseudo\_1799  
CGAGUGUUGCUAUAUCAAGUUGUAAAGAGGA  
>piR\_pseudo\_26258  
AGGCUAUUGACACCAUAGAUCGAAUGUUUAC  
>piR\_pseudo\_6824  
UUACCGUUUAGGUAAUACAGACCGUUUUCAA  
>piR\_pseudo\_14905  
CGCUUUACCAUAGUACCUUGGGAUGCCGGUA  
>piR\_pseudo\_989  
ACGGCCAUAACAUCGGUAACCUCCAUUCAGGU  
>piR\_pseudo\_19808  
AAUAACUGCCUCGGCCCCAAAGGAUUUAAA  
>piR\_pseudo\_2377  
CAGUAAAUGUAGACAGUCGAGCAGUGAUCCG  
>piR\_pseudo\_25198  
GUAAGUAACAUGAAAAGGCCAAUCCUAUCU  
>piR\_pseudo\_23760  
ACUAGCGAAGAGUAGGACGCUUUGGACGCCU  
>piR\_pseudo\_26728  
AGGAUGUGUCACACUAUGUGCUAGGGAAUUA  
>piR\_pseudo\_22399  
GUAGUCGUGUCGAAGGCUAUGUAUUUAUACU  
>piR\_pseudo\_13117  
UUCGUGUGACACGGUCGUAGUCGGAGAGUAU  
>piR\_pseudo\_22120  
CGGCGUACUAAGUGUGUUCUGACGUUUUUGA  
>piR\_pseudo\_5533  
GUGUAUAUUGGACUUGGUCCAUGAAGAAUAC  
>piR\_pseudo\_23218  
GCAAGGACUUUAAUACAAAUGCCUUUUACAU  
>piR\_pseudo\_25971  
AUCGACGUGUUAAUUGGCGGUUUUGGCGU  
>piR\_pseudo\_17733  
AAUCUAGAGUGUCCGCAGAGUAUAAAACAAU  
>piR\_pseudo\_12886  
GUACGAAUCUGUAUGCUGAGCUUAGUAGCUA  
>piR\_pseudo\_20616  
CGUUGACGUCUUGUAUACUAUAACGAGGGUU  
>piR\_pseudo\_7335

AAGUUGAGAGAGUUUCGGUGAACUAUAUUUA  
>piR\_pseudo\_16878  
UAAUUUCGACUAGAAACGUGUGUUUCUUAGA  
>piR\_pseudo\_6376  
UCUUUCCCGUCUGUGACAUUUGUUGGUUUAC  
>piR\_pseudo\_25272  
UUGGAGGUUGACAUUACAGAGGUAUCAACUA  
>piR\_pseudo\_19327  
UAGUAGGGCGAUUAUAAAGCCACUAUCUUUU  
>piR\_pseudo\_14411  
GCAAUUCUGAGUAGCUUAAAGAGACCCGUUA  
>piR\_pseudo\_24427  
AAAGACCGGAAGAGUCCACAUGUCCUAAAC  
>piR\_pseudo\_21188  
GGCCUGCGUCGCCUAGCCGCCUCGCCCCCCC  
>piR\_pseudo\_10198  
UGAAUAGCAGCAAGCGGAGAGCUGAAAUGA  
>piR\_pseudo\_2470  
CUUAUUGUCCACGUUUUGCUAAUGCCAUG  
>piR\_pseudo\_11239  
GUGGCCAAUAAAGUGAUGUCAUCUAACGAUG  
>piR\_pseudo\_12569  
GAACUGGCUGGACUGUCCACAAACGCUGCA  
>piR\_pseudo\_17577  
AAUAGGAGGCGAUAAAUACGCUCUCUUUGUG  
>piR\_pseudo\_79  
GGUAAUGGCGUUAGUGACUGCAGCGGUGCU  
>piR\_pseudo\_17947  
UUACUUGAAUAACGUUUACGCCAAUGAGUAG  
>piR\_pseudo\_23321  
GUUGAUCACCACGUGACGUAUGUCCGCGGA  
>piR\_pseudo\_10138  
AGGGCAUACCACUCCUUUGGAUGAUGGUGA  
>piR\_pseudo\_12489  
GUGGGCAGCGUGUGCGUGUAAAUAUUUGGU  
>piR\_pseudo\_16838  
CUCCAGUGGACUUAGGUACGGUGGCCAUACU  
>piR\_pseudo\_20457  
GGUACAUUACCUUGCUUCGUUCAUGGGAAUG  
>piR\_pseudo\_108  
CAAGUUUUUUCUGGCGGGUCUGAGUGAUUUU  
>piR\_pseudo\_2487  
CUUGUAAUCCUUGUUUGUCCAUGCAAACUAA  
>piR\_pseudo\_17732

AUAAUUGGUUAAUUCAUGCUCGUAGCGAUCC  
>piR\_pseudo\_13175  
AGACAAUAUAAAUAAGUUUUUAUUCUUUA  
>piR\_pseudo\_3813  
AUUAUUCUACACGAGGGUCCAGGGGAUUUC  
>piR\_pseudo\_12561  
CGAGAGAAACAAUUCGGAAGUGUCAUAUAU  
>piR\_pseudo\_11850  
AGUUCUAGCGCGCUCACAAUAUGAUAAACCA  
>piR\_pseudo\_26269  
AUGUGCCCGUAUCUAAACUAGCGUAACUCGU  
>piR\_pseudo\_14724  
CCGGGCGGAACCAGGUAAUUAUUGGACCCC  
>piR\_pseudo\_15802  
UGCGGCAGUUUCCCCGAUUAAGCAAUUC  
>piR\_pseudo\_15764  
AGGAGCUUCCUCAGGGACGCCGUCAGGUUCG  
>piR\_pseudo\_3551  
CAGGAAACAGAUUUGUUGUAAUCUUAAGCC  
>piR\_pseudo\_26009  
AUACGGUCAUUUGUACAUUACCGGGUUGGUA  
>piR\_pseudo\_21624  
GCCUAUAGGACACAAUCCUCGCCAGGUGCAU  
>piR\_pseudo\_26538  
AAUGUACGCCCUUUCUAGAAUAAGUUCAUGA  
>piR\_pseudo\_5917  
ACAGUCCGUUCCCGUUACGAAUAACUGGUU  
>piR\_pseudo\_366  
CUUACUGAUUACCCUAUAUCUCUUAACUGUA  
>piR\_pseudo\_26538  
GUACUCCAAUUGGUCGUUUAUUGUACAAUAC  
>piR\_pseudo\_24184  
GGGUCUCCAAUUGUAGUUGUGUUUCACGAUU  
>piR\_pseudo\_24541  
AGACGUAAACGGCAGGCGAGCGUUACGCAUA  
>piR\_pseudo\_24057  
ACAAUAUAGGGACGGUAUAUAGCAGUGGACG  
>piR\_pseudo\_23649  
AGCAUGCUCACGAGGACGCCUGAUUAAUAA  
>piR\_pseudo\_19281  
CUGACAGAGGACCUCGCCGUACAUUACGGA  
>piR\_pseudo\_22222  
GCUUGACUUGAGGGUCCACCUGGUCAUGGCU  
>piR\_pseudo\_18927

AGUUUAGAAGGACAUAAAAACUAAUUCAAC  
>piR\_pseudo\_26342  
CGGUCUCACGGCGUUUAUUUUGGCAUUUCUA  
>piR\_pseudo\_11776  
CGGAUCACAAGCAGCCCGGGCUGACGAAUGA  
>piR\_pseudo\_8987  
CCGGUAUAGAUGACGAAACCCUACCGGUGGG  
>piR\_pseudo\_26054  
UGGAAUUAUCCUUGAUUCCGCGAGCAGAAC  
>piR\_pseudo\_21799  
AAUCUACACUAGCAUGACGGGUCUCUGUACA  
>piR\_pseudo\_18283  
CUUUCGUAAGGAGGUUGUGUUUUAGAGGC  
>piR\_pseudo\_3249  
GACUUUAUCUGAUCGGAAAAGUGGAAAUCGA  
>piR\_pseudo\_6812  
CGUCCGGGUUUGGUGUUGAAAUACGCAAGCC  
>piR\_pseudo\_12547  
GACGGGAACUCGGUGUAGGAGAAAGCGCUGG  
>piR\_pseudo\_1420  
CAAUAGAGUUGCACCGCAAUGGAAAGUGUAC  
>piR\_pseudo\_8483  
CUACGUUUAACUCUGUGCUGUCUUUAUUUGG  
>piR\_pseudo\_16175  
CAGUCUUAAGUGCGACUAAAGGACUGGCCAG  
>piR\_pseudo\_3945  
AAAACCGAUUGGAUUCUUGAUGUGUUCUAUG  
>piR\_pseudo\_20938  
UCGCGUGGAGCGUUAGCUAAUCCAAAUGUUG  
>piR\_pseudo\_25545  
AAGCCCCUCCACCCCGCCUGGGCGGAGUAG  
>piR\_pseudo\_12035  
GGAUCCAACCAUUGAUUGUGGUAAAUCGCAU  
>piR\_pseudo\_15101  
AGGCGCCGAAUCACGGAGCUCUCUUGGAUUC  
>piR\_pseudo\_11310  
AAAUCUAUUCUCGCAGUUAUCUAGAAUAGG  
>piR\_pseudo\_12857  
UUCUGCUGUACGGGGAGUAUCCGCACCCCGU  
>piR\_pseudo\_14095  
ACUAAUGCCUUUGAAUAUCAAUUAGAAUUAU  
>piR\_pseudo\_24725  
UCAUUUGUCGUUAGCCUAGGGGUGGCCGGC  
>piR\_pseudo\_25471

AAGUGUCAGACCCUGGUGAUACGCAUUAGGU  
>piR\_pseudo\_8593  
GAAAUUUUAUUCAUGUUGGCUAUUUGGAAAUC  
>piR\_pseudo\_1831  
GUACAGAGGUCCUACAAUUGGACAUCGGAG  
>piR\_pseudo\_23587  
UACUACGUUAGAAUAAAUAGUGACAUUAAC  
>piR\_pseudo\_3659  
UUGAAUGUGUUUAUGGUUUUUUGUAUUCUUA  
>piR\_pseudo\_8555  
UAGUAUAGUAUUGAGGUGUAGCCAGCGUACC  
>piR\_pseudo\_7806  
GACGUCGUCCGGAGUUAGACCAGCGCCCCCU  
>piR\_pseudo\_3684  
UUGGAAUUGAGAUUAACAACAUUGAAGAAAU  
>piR\_pseudo\_26638  
GAUUGAUAACUUAUAUGAUGUUUCGCUGUAC  
>piR\_pseudo\_12864  
CGUUGCCGUUCAACGUGUAGUACGAAUAUC  
>piR\_pseudo\_7653  
UAACUGGUAGGAAAUGGUUAUUCAUGGGCAA  
>piR\_pseudo\_8780  
GUGGCGUUCACGGAGAUUUGUGUAUUACAGA  
>piR\_pseudo\_17241  
CCAUAUCUGCAGGCUGACGAUAGGGGAGUA  
>piR\_pseudo\_18754  
GGUGGGCGUGUCUCUGCCCGGAGUCUCACC  
>piR\_pseudo\_23115  
GGCAUCUAAACGAUAGAAAGUAUCGCCCCAU  
>piR\_pseudo\_22101  
UGCAAUGACAUUAGCGUACAUAUAGGUGUGAAU  
>piR\_pseudo\_407  
UGGGCGUAUGACAGUAGUACGCGGGUACAGAA  
>piR\_pseudo\_2917  
GUGCGUUGCAUGCUUUUUUCUUUAUCAUCUAA  
>piR\_pseudo\_11002  
GCGUUCAGGCGGCUUGACGAGGCGGCCUCGGU  
>piR\_pseudo\_7021  
CGUGUCUAAACAUUGUCUGGAUCAGGGUUUAUUAU  
>piR\_pseudo\_19504  
CCCACCUCGAGUCAGGUGACAUUAAGCCAUG  
>piR\_pseudo\_6645  
UAGUUGCUAGGAUUUUAGAUUGGUAUUCGUA  
>piR\_pseudo\_8376



UGAUGCGCCUCCGUUUUGUAUUUAAAAUUAGC  
>piR\_pseudo\_15933  
AUUAGGGGUGGAGGUUGCGAACAAAUUGUCGU  
>piR\_pseudo\_13703  
CAUUAGAAAGAUUGGAUAUUUUCGCGAAACGA  
>piR\_pseudo\_25705  
UAUAGGUCGAGUAGCGUUGAAUUUGCACUCAG  
>piR\_pseudo\_3838  
UAUAUCGAUUAACUAAUCCCCGGCUGUAGGU  
>piR\_pseudo\_24592  
UAUUCGUAGCCGCAGAUGUAACCGGUCAGAAA  
>piR\_pseudo\_19754  
GCGCCGCCCAUUCGGGGUGGGUCCCGGAAC  
>piR\_pseudo\_5802  
UGUGUUAAGUUAGCUGCUCCGAUUUAGUAGGA  
>piR\_pseudo\_5252  
UAAAGUUGCCCAUUGAUUCACGCGGAUCCUAC  
>piR\_pseudo\_17187  
UAGUUUAUGAUUAAAUCGUCAUGCUCACUAG  
>piR\_pseudo\_15425  
UCUCAAGGAGUUUGAAGACGCGUCUUGAGCGA  
>piR\_pseudo\_21107  
UUUAGUCGACUUGUCGAUCGACCGUAUCCGAA  
>piR\_pseudo\_21248  
AAGAAUGUAAGUGGGGAUUGUAGUCCUAGAUA  
>piR\_pseudo\_8084  
CUACUACUUUGUCUUUGGGUAGGAUCGGGCG  
>piR\_pseudo\_24597  
AAUUGUUUAAUUCUCUAUGGAUCAUUGUUUUAU  
>piR\_pseudo\_1329  
CAUCCAAAGUUACCUUGCUCUAAAGAUGUGCG  
>piR\_pseudo\_5116  
AGAAUCUCGUAAGCUAUGCAUGAGCAGAAUGG  
>piR\_pseudo\_5169  
GGGUUUGCUCACUACUGCGUGCAGGAUGUCAC  
>piR\_pseudo\_5251  
CCCGGAGGCCGAAGCCCUCGCAGGGGCCCCUG  
>piR\_pseudo\_25058  
AAAGGUGCAUGUUAUUAUGUCGUGGGGUUAU  
>piR\_pseudo\_18793  
GUGGGGCAUUGAUACUGGUUGCAUCGAGCUGC  
>piR\_pseudo\_14779  
AGAGGACUGCGAUUAUACAACUUCAUUGAAUG  
>piR\_pseudo\_4777

UACUGAGUAAAACACCUCUGGGACUGACAUA  
>piR\_pseudo\_9258  
GGUGAAAGGUCCUGUAGUUCUCUGCUCCCCG  
>piR\_pseudo\_16302  
UAGGUGUCCGUAAAUCUCUUACCGAUGUCUG  
>piR\_pseudo\_11946  
ACCCUAGCUGAGCCGGUACCCAGGGAUCCUC  
>piR\_pseudo\_17183  
ACCGUAAAGGUGAGUUGAUUAUCAAUUCUAG  
>piR\_pseudo\_1755  
GUCGCUCCAAAGUUUGUUGGGUUUGUGGGAG  
>piR\_pseudo\_12004  
CGAGCGGCCGAAGCGCAAAGCGCGAGGGGCG  
>piR\_pseudo\_23499  
AGUAAUUACCGGCUUAUGCAUGACGUUGCAC  
>piR\_pseudo\_11965  
UUAUUAGUGCGUAGUCCUCAUGUCCGAGUGCU  
>piR\_pseudo\_10047  
UGUGGAAGCAAGUCUUGCUAAGUUAUUUUUAU  
>piR\_pseudo\_2032  
UGUACCUGCGUAGCAUAAUUAUUCUUAUAGCU  
>piR\_pseudo\_19222  
GCGCGAGGCUCGGAUUGCUGCUGGUAGAUCGA  
>piR\_pseudo\_4711  
UAUUGUAUCUUUGGGUAGACGCUAAGAUUAGA  
>piR\_pseudo\_21037  
AAUGGAUGAGUGCUUAAUGGACUAAUUCUGCU  
>piR\_pseudo\_14112  
GGUGAAUCUUGGGAUAAAGGUGAGCUAGCUAG  
>piR\_pseudo\_18164  
UCCAAUCCAUCCGUGGAUUGGGAUAGGCUCGC  
>piR\_pseudo\_11710  
UACCCAGCUGCCUACACUGCCUGUGAAAAAUG  
>piR\_pseudo\_18645  
GCAGCGUCCCCGGUUGAUUCGGACAGGCAUCG  
>piR\_pseudo\_19764  
AGCGUAAAUGAAGCCCGGACGGUCACCAACGC  
>piR\_pseudo\_15864  
UCCCGCUAUCGUCGUAUCCAUGAAACUUAGGG  
>piR\_pseudo\_276  
AUCGAUCGUAUGGACGGAAACGUAAUAAUAGA  
>piR\_pseudo\_13371  
UCCAAGCCACCUGACAGAUCUGUUCAUGAAA  
>piR\_pseudo\_23351

CUUUUACUACAAACAAUUGUUGUAUGUUCGAU  
>piR\_pseudo\_19711  
CUCAUCAUUGGUGUGACUUGCGGCUAUUCGGU  
>piR\_pseudo\_9064  
CUCCAUCGUUGGACGGGAAGCUUGAGGUAUAG  
>piR\_pseudo\_15001  
CCUGUGACCAGGCUAAGCCUGAGGAGCUUCUGA  
>piR\_pseudo\_11110  
UACCUCGCUCAAAAGCGCAGUGGGUAAGUGACCU  
>piR\_pseudo\_19206  
UACAUGAUCUUCUGCAUCGAAGGAUCCUUAGUAU  
>piR\_pseudo\_2883  
AAACAGAUUGAGGCGAGACCACAAAGACCCUGGC
