# Supplementary material for: 2L-piRNA: A Two-Layer Ensemble Classifier for Identifying Piwi-Interacting RNAs and Their Function
Source: PubMed Central journal article supplement — Mol Ther Nucleic Acids. 2017 Apr 13;7:267–77. doi: 10.1016/j.omtn.2017.04.008 (PMC5415553; doi:10.1016/j.omtn.2017.04.008), 2017-04-13
Supplement: mmc2.pdf [file mmc2.pdf]

# 2L-piRNA: A Two-Layer Ensemble Classifier for Identifying Piwi-Interacting RNAs and Their Function

Bin Liu,<sup>1,2,3</sup> Fan Yang,<sup>1</sup> and Kuo-Chen Chou<sup>3,4,5</sup>

<sup>1</sup>School of Computer Science and Technology, Harbin Institute of Technology Shenzhen Graduate School, Shenzhen, Guangdong 518055, China; <sup>2</sup>Key Laboratory of Network Oriented Intelligent Computation, Harbin Institute of Technology Shenzhen Graduate School, Shenzhen, Guangdong 518055, China; <sup>3</sup>Gordon Life Science Institute, Belmont, MA 02478, USA; <sup>4</sup>Center for Informational Biology, University of Electronic Science and Technology of China, Chengdu 610054, China; <sup>5</sup>Center of Excellence in Genomic Medicine Research, King Abdulaziz University, Jeddah 21589, Saudi Arabia

**Involved with important cellular or gene functions and implicated with many kinds of cancers, piRNAs, or piwi-interacting RNAs, are of small non-coding RNA with around 19–33 nt in length. Given a small non-coding RNA molecule, can we predict whether it is of piRNA according to its sequence information alone? Furthermore, there are two types of piRNA: one has the function of instructing target mRNA deadenylation, and the other does not. Can we discriminate one from the other? With the avalanche of RNA sequences emerging in the postgenomic age, it is urgent to address the two problems for both basic research and drug development. Unfortunately, to the best of our knowledge, so far no computational methods whatsoever could be used to deal with the second problem, let alone deal with the two problems together. Here, by incorporating the physicochemical properties of nucleotides into the pseudo K-tuple nucleotide composition (PseKNC), we proposed a powerful predictor called 2L-piRNA. It is a two-layer ensemble classifier, in which the first layer is for identifying whether a query RNA molecule is piRNA or non-piRNA, and the second layer for identifying whether a piRNA is with or without the function of instructing target mRNA deadenylation. Rigorous cross-validations have indicated that the success rates achieved by the proposed predictor are quite high. For the convenience of most biologists and drug development scientists, the web server for 2L-piRNA has been established at <http://bioinformatics.hitsz.edu.cn/2L-piRNA/>, by which users can easily get their desired results without the need to go through the mathematical details.**

## INTRODUCTION

With a length of around 19–33 nt, piRNAs (piwi-interacting RNAs) distinctly belong to the largest class of small non-coding RNA molecules in animal cells.<sup>1–4</sup> They are involved with many cellular or gene functions including the transposon silencing, specific protein translation, gene expression regulation, and the formation and maintenance of germ cells.<sup>5–7</sup> Moreover, many studies (see, e.g., Mei et al.,<sup>8</sup> Cheng et al.,<sup>9</sup> Moyano and Stefani,<sup>10</sup> and Hashim et al.<sup>11</sup>) have shown that

piRNAs have been implicated with many kinds of cancers. Therefore, knowledge about piRNAs and their functions is very important for drug development, as well as for RNA biology and many other relevant areas.

Given an RNA molecule, can we identify whether it belongs to piRNA? Lee et al.<sup>12</sup> and Nishibu et al.<sup>13</sup> had developed some experimental methods to address this problem, greatly stimulating the development of this area. But purely using experimental methods alone to do the sequence analyses is not only inefficient and expensive, but also insensitive for many cases (e.g., it is difficult to get sufficient quantity of samples for observation). Facing the explosive growth of RNA sequences in the postgenomic age, to make the piRNA analysis in a more efficient way, as well as in a faster pace and at a deeper level, we could not help but resort to the computational approach.

Actually, several computational methods have been proposed for classifying piRNA from non-piRNA sequences. For instance, by combining the k-mer scheme and support vector machine (SVM), Zhang et al.<sup>14</sup> proposed a model called piRNAPredictor. Three years later, Wang et al.<sup>15</sup> proposed a different model for predicting piRNAs by using the transposon interaction and SVM. Recently, two more papers were published for identifying piRNAs. One was authored by Luo et al.,<sup>16</sup> who considered the physicochemical properties of RNA sequences, and the other was authored by Li et al.,<sup>17</sup> who used the powerful ensemble approach. Both methods were quite powerful, reaching the state-of-the-art performance.

---

Received 16 January 2017; accepted 7 April 2017;  
<http://dx.doi.org/10.1016/j.omtn.2017.04.008>.

**Correspondence:** Bin Liu, Harbin Institute of Technology Shenzhen Graduate School, HIT Campus Shenzhen University Town, Xili, Shenzhen, Guangdong 518055, China.

**E-mail:** [bliu@hit.edu.cn](mailto:bliu@hit.edu.cn)

**Correspondence:** Kuo-Chen Chou, Gordon Life Science Institute, Belmont, MA 02478, USA.

**E-mail:** [kcchou@gordonlifescience.org](mailto:kcchou@gordonlifescience.org)

**Table 1. A Comparison of the Proposed Predictor with the Existing State-of-the-Art Methods in Identifying piRNAs, First Layer, and Their Functional Types, Second Layer**

| Method                                 | Sn (%) <sup>a</sup> | Sp (%) <sup>a</sup> | Acc (%) <sup>a</sup> | MCC <sup>a</sup> |
|----------------------------------------|---------------------|---------------------|----------------------|------------------|
| <b>First Layer</b>                     |                     |                     |                      |                  |
| 2L-piRNA <sup>b</sup>                  | 88.3                | 83.9                | 86.1                 | 0.723            |
| Accurate piRNA prediction <sup>c</sup> | 83.1                | 82.1                | 82.6                 | 0.651            |
| GA-WE <sup>d</sup>                     | 90.6                | 78.3                | 84.4                 | 0.694            |
| <b>Second Layer</b>                    |                     |                     |                      |                  |
| 2L-piRNA <sup>b</sup>                  | 79.1                | 76.0                | 77.6                 | 0.552            |
| Accurate piRNA prediction <sup>c</sup> | N/A                 | N/A                 | N/A                  | N/A              |
| GA-WE <sup>d</sup>                     | N/A                 | N/A                 | N/A                  | N/A              |

All of the data listed were obtained by the 5-fold cross-validation on the same benchmark dataset (Supplemental Information). N/A means “not available,” namely, the corresponding method fails to yield any result for the second-layer prediction.

<sup>a</sup>See Equation 15 for the metrics' definition.

<sup>b</sup>The new method presented in this paper.

<sup>c</sup>The existing state-of-the-art method proposed by Luo et al.<sup>16</sup>

<sup>d</sup>The existing state-of-the-art method proposed by Li et al.<sup>17</sup>

It is instructive to point out, however, that there are two types of piRNA in the real world. One has the function of instructing target mRNA deadenylation<sup>18</sup> and the other does not. But none of the aforementioned methods has the function to distinguish these two types.

The present study was initiated in an attempt to fill in this empty area by developing a new predictor that not only can be used to identify piRNAs, but also can be used to identify their functional types.

## RESULTS AND DISCUSSION

Listed in Table 1 are the success rates measured by the four metrics of Equation 15 that have been achieved by the proposed two-layer predictor 2L-piRNA on the benchmark datasets  $\mathbb{S}$  and  $\mathbb{S}^+$  of Equation 1, respectively. For facilitating comparison, listed in the table are also the corresponding results obtained by the powerful existing state-of-the-art methods<sup>16,17</sup> published very recently. From Table 1, we can clearly see the following: (1) for the first-layer prediction, the new predictor 2L-piRNA is superior to the existing state-of-the-art methods in both accuracy (Acc) and Matthews correlation coefficient (MCC), the two most important metrics; the former reflects the overall accuracy of a predictor, and the latter reflects its stability; (2) it is slightly better or comparable with the existing state-of-the-art methods in Sn (sensitivity) and Sp (specificity); and (3) for the second-layer prediction, 2L-piRNA is overwhelmingly better because the existing state-of-the-art methods simply did not have the function to yield any results at this step. Accordingly, the significance of the newly proposed predictor is self-evident.

To further show the advantage of the current 2L-piRNA in using the ensemble classifier approach, we adopted the graphic analysis because it is particularly useful for studying complicated biological systems, as demonstrated by a series of previous studies in many different fields (see, e.g., Jiang et al.,<sup>19</sup> Chou and Forsén,<sup>20</sup> Zhou and Deng,<sup>21</sup> Chou,<sup>22</sup>

Althaus et al.,<sup>23,24</sup> Wu et al.,<sup>25</sup> Chou et al.,<sup>26</sup> Zhou,<sup>27</sup> and Zhou et al.<sup>28</sup>). Shown in Figure 1 is the graph of receiver operating characteristic (ROC).<sup>29,30</sup> As we can see from the figure, the area under the ROC curve (AUC) for the ensemble classifier is remarkably larger than any of the individual ones in both the first-layer case (Figure 1A) and second-layer case (Figure 1B), once again demonstrating the merit of 2L-piRNA via the intuitive graphical approach.

## Conclusions

It is anticipated that the 2L-piRNA will become a very useful high-throughput tool in genome analysis and drug development, particularly in those areas involved with non-coding RNAs.

## MATERIALS AND METHODS

### Benchmark Dataset

According to Chou's five-step rule<sup>31</sup> for developing a really useful statistical predictor, the first important thing is to construct or select a reliable benchmark dataset. In literature the benchmark dataset usually consists of a training dataset and a testing dataset: the former is for the usage of training a model, whereas the latter is for testing the model. But as elucidated in a comprehensive review,<sup>32</sup> there is no need to artificially separate a benchmark dataset into the aforementioned two parts if the prediction model is examined by the jack-knife test or subsampling (K-fold) cross-validation because the outcome thus obtained is actually from a combination of many different independent dataset tests. Thus, the benchmark datasets  $\mathbb{S}$  for the current study can be formulated as

$$\begin{cases} \mathbb{S} = \mathbb{S}^+ \cup \mathbb{S}^- \\ \mathbb{S}^+ = \mathbb{S}_{\text{inst}}^+ \cup \mathbb{S}_{\text{non-inst}}^+ \end{cases}, \quad (1)$$

where  $\mathbb{S}^-$  is the negative subset that contains the non-piRNA samples only,  $\cup$  is the symbol for union in the set theory,  $\mathbb{S}^+$  is the subset that contains the piRNA samples only,  $\mathbb{S}_{\text{inst}}^+$  is the sub-subset that contains piRNA samples having the function of instructing target mRNA deadenylation,<sup>18</sup> whereas  $\mathbb{S}_{\text{non-inst}}^+$  is the sub-subset without such function.

The concrete procedures to construct the benchmark dataset of Equation 1 are as follows: (1) The piRNA sequences were taken from piRBase;<sup>33</sup> (2) collected for  $\mathbb{S}_{\text{inst}}^+$  are only those samples that were annotated with piRNA having the function of instructing target mRNA deadenylation; (3) collected for  $\mathbb{S}_{\text{non-inst}}^+$  are only those samples that were annotated with piRNA without the function of instructing target mRNA deadenylation; (4) the corresponding non-piRNA sequences for the negative subset  $\mathbb{S}^-$  were taken from Bu et al.;<sup>34</sup> (5) the CD-HIT software<sup>3</sup> with the cutoff threshold 0.8 was used to remove the redundancy for each of the aforementioned subsets; and (6) to minimize the negative effect caused by the skewed benchmark dataset,<sup>35–38</sup> the random sampling method was applied to balance out each of the subsets with its counterpart. The final benchmark dataset obtained by strictly following the above procedures contains 2,836 samples, of which 709 belong to  $\mathbb{S}_{\text{inst}}^+$ , 709 to  $\mathbb{S}_{\text{non-inst}}^+$ , and 1,418 to  $\mathbb{S}^-$ .

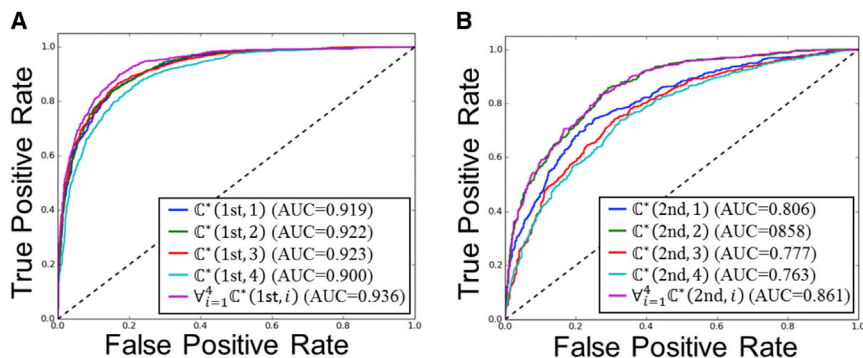

**Figure 1. The Performances of the First- and Second-Layer Ensemble Sub-predictors in Comparison with Their Respective Individual Four Basic Predictors**

(A and B) A graphical illustration to show the performances of (A) the first-layer ensemble sub-predictor and (B) the second ensemble sub-predictor predictor in comparison with their respective individual four basic predictors (cf. Equation 14). The performances are illustrated by means of the ROC curves.<sup>29,30</sup> The greater the area under the ROC curve (AUC) value is, the better the performance will be.

Shown in Figure 2 is the sequence length distribution of the samples in the benchmark dataset; their detailed sequences and the relevant codes are given in the Supplemental Information.

**Pseudo K-Tuple Nucleotide Composition**

With a good benchmark dataset, the next thing we need to consider is how to formulate the samples therein. Actually, this is one of the most challenging problems in computational biology. This is because all the existing machine learning algorithms were designed to handle the discrete models or vectors only.<sup>39</sup> But a biological sequence expressed by a vector may completely miss its sequence order or pattern,<sup>40</sup> so as to limit the prediction quality. The pseudo amino acid composition (PseAAC) was proposed to deal with such a dilemma.<sup>40-45</sup> Ever since the concept of PseAAC was introduced, it has been rapidly and widely used in nearly all the areas of computational proteomics (see, e.g., Du et al.,<sup>45</sup> Lin and Lapointe,<sup>46</sup> Chou,<sup>47</sup> Khan et al.,<sup>48</sup> and Meher et al.<sup>49</sup> and a long list of references cited in these papers). Inspired by the great successes of using PseAAC to represent protein-peptide sequences, the PseKNC (pseudo K-tuple nucleotide composition) was introduced to represent DNA/RNA sequences.<sup>50-54</sup> Likewise, since its introduction, PseKNC has also been increasingly applied in many areas of genome analysis.<sup>37,55-68</sup>

For an RNA sample with  $L$  nucleotide, its sequence expression is generally given by

$$\mathbf{R} = N_1 N_2 N_3 \cdots N_i \cdots N_L, \tag{2}$$

where

$$N_i \in \{ A \text{ (adenine)}, C \text{ (cytosine)}, G \text{ (guanine)}, U \text{ (uracil)} \} \tag{3}$$

denotes the nucleotide at the  $i$ -th sequence position, and  $\in$  is the a symbol in the set theory meaning “member of.” According to a recent review paper,<sup>69</sup> the general form of PseKNC for  $\mathbf{R}$  of Equation 2 can be formulated as

$$\mathbf{R} = [\phi_1 \quad \phi_2 \quad \cdots \quad \phi_u \quad \cdots \quad \phi_Z]^T, \tag{4}$$

where the components  $\phi_u (u = 1, 2, \dots)$  and  $Z$  is an integer; their values will depend on how the desired features are extracted from the RNA sample; and  $\mathbf{T}$  is the transposing operator to a matrix or vector.

In this study, we take

$$\phi_u = \begin{cases} \frac{f_u^{K-tuple}}{\sum_{i=1}^{4^K} f_u^{K-tuple} + w \sum_{j=1}^{\lambda} \theta_j} & (1 \leq u \leq 4^K) \\ \frac{w \theta_{u-4^K}}{\sum_{i=1}^{4^K} f_u^{K-tuple} + w \sum_{j=1}^{\lambda} \theta_j} & (4^K + 1 \leq u \leq 4^K + \lambda) \end{cases}, \tag{5}$$

where  $f_u^{K-tuple}$  is the  $u$ -th component of the  $K$ -tuple nucleotide composition for the RNA sample sequence, and

$$\theta_j = \frac{1}{L - K - (\lambda - 1)} \sum_{i=1}^{L-K-(\lambda-1)} C_{i,i+j} \quad (j = 1, 2, \dots, \lambda; \lambda < L - K). \tag{6}$$

In Equation 6, the correlation function or coupling factor is given by

$$C_{i,i+j} = \frac{1}{\mu} \sum_{\xi=1}^{\lambda} \times [H_{\xi}(N_i N_{i+1} \cdots N_{i+K-1}) - H_{\xi}(N_{i+j} N_{i+j+1} \cdots N_{i+j+K-1})]^2, \tag{7}$$

where  $\mu$  is the number of physicochemical properties considered, whereas  $H_{\xi}(N_i N_{i+1} \cdots N_{i+K-1})$  is the numerical value of the  $\xi$ -th physicochemical property for the  $K$ -mer  $N_i N_{i+1} \cdots N_{i+K-1}$  in the RNA sequence, and so forth.

In this study, we consider pseudo dinucleotide composition. Thus, we can substitute  $K = 2$  into Equations 5, 6, and 7. Also, we used the values of the following six RNA dimer’s physicochemical properties: rise, roll, shift, slide, tilt, and twist (Table 2). Thus, we can substitute  $\mu = 6$  as well as Rise ( $N_i N_{i+1}$ ), Slide ( $N_i N_{i+1}$ ), Shift ( $N_i N_{i+1}$ ), Twist

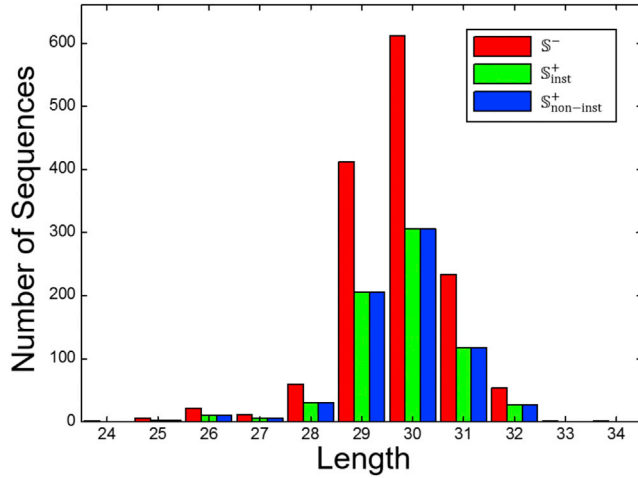

Figure 2. Length Distribution of the Sequences in the Benchmark Dataset

( $N_i N_{i+1}$ ), Roll ( $N_i N_{i+1}$ ), Tilt ( $N_i N_{i+1}$ ), and so forth into Equation 7 to get the coupling factors.

Note that before substituting them into Equation 7, all the original values in Table 2 were subjected to a standard conversion,<sup>41</sup> as described by the following equations:

$$\left\{ \begin{array}{l} \text{Rise}(N_i N_{i+1}) \leftarrow \frac{\text{Rise}(N_i N_{i+1}) - \langle \text{Rise} \rangle}{\text{SD}(\text{Rise})} \\ \text{Slide}(N_i N_{i+1}) \leftarrow \frac{\text{Slide}(N_i N_{i+1}) - \langle \text{Slide} \rangle}{\text{SD}(\text{Slide})} \\ \text{Shift}(N_i N_{i+1}) \leftarrow \frac{\text{Shift}(N_i N_{i+1}) - \langle \text{Shift} \rangle}{\text{SD}(\text{Shift})} \\ \text{Twist}(N_i N_{i+1}) \leftarrow \frac{\text{Twist}(N_i N_{i+1}) - \langle \text{Twist} \rangle}{\text{SD}(\text{Twist})} \\ \text{Roll}(N_i N_{i+1}) \leftarrow \frac{\text{Roll}(N_i N_{i+1}) - \langle \text{Roll} \rangle}{\text{SD}(\text{Roll})} \\ \text{Tilt}(N_i N_{i+1}) \leftarrow \frac{\text{Tilt}(N_i N_{i+1}) - \langle \text{Tilt} \rangle}{\text{SD}(\text{Tilt})} \end{array} \right. \quad (8)$$

where the symbol “ $\langle \rangle$ ” means taking the average of the quantity therein over 16 different dinucleotides. The converted values obtained by Equation 8 will have a zero mean value over the 16 different dinucleotides and will remain unchanged if going through the same conversion procedure again. Listed in Table 3 are the corresponding values obtained via the standard conversion of Equation 8 from those of Table 2.

### Operation Engine

Below, let us consider the third step of the five-step rule,<sup>31</sup> i.e., what kind of algorithms should be used to operate the training and predicting.

### Support Vector Machine

Being widely used in many different areas of computational biology (see, e.g., Feng et al.<sup>70</sup> Han et al.,<sup>71</sup> Liu et al.,<sup>72</sup> Kumar et al.,<sup>73</sup> Kiu

Table 2. The Original Values of Rise, Roll, Shift, Slide, Tilt, and Twist for the 16 Dinucleotides in RNA<sup>51,142</sup>

| Dimer | Physicochemical Property |      |       |       |      |       |
|-------|--------------------------|------|-------|-------|------|-------|
|       | Rise                     | Roll | Shift | Slide | Tilt | Twist |
| AA    | 3.18                     | 7.0  | -0.08 | -1.27 | -0.8 | 31    |
| AC    | 3.24                     | 4.8  | 0.23  | -1.43 | 0.8  | 32    |
| AG    | 3.30                     | 8.5  | -0.04 | -1.50 | 0.5  | 30    |
| AU    | 3.24                     | 7.1  | -0.06 | -1.36 | 1.1  | 33    |
| CA    | 3.09                     | 9.9  | 0.11  | -1.46 | 1    | 31    |
| CC    | 3.32                     | 8.7  | -0.01 | -1.78 | 0.3  | 32    |
| CG    | 3.30                     | 12.1 | 0.30  | -1.89 | -0.1 | 27    |
| CU    | 3.30                     | 8.5  | -0.04 | -1.50 | 0.5  | 30    |
| GA    | 3.38                     | 9.4  | 0.07  | -1.70 | 1.3  | 32    |
| GC    | 3.22                     | 6.1  | 0.07  | -1.39 | 0.0  | 35    |
| GG    | 3.32                     | 12.1 | -0.01 | -1.78 | 0.3  | 32    |
| GU    | 3.24                     | 4.8  | 0.23  | -1.43 | 0.8  | 32    |
| UA    | 3.26                     | 10.7 | -0.02 | -1.45 | -0.2 | 32    |
| UC    | 3.38                     | 9.4  | 0.07  | -1.70 | 1.3  | 32    |
| UG    | 3.09                     | 9.9  | 0.11  | -1.46 | 1.0  | 31    |
| UU    | 3.18                     | 7.0  | -0.08 | -1.27 | -0.8 | 31    |

et al.,<sup>74</sup> Liu et al.,<sup>75,76</sup> Rahimi et al.,<sup>77</sup> and Chen et al.<sup>78</sup>), SVM is a powerful algorithm in cluster analysis. Its basic idea has been elaborated in the aforementioned papers, and hence there is no need to repeat it here. For those who are interested in knowing more about SVM, refer to the previous papers<sup>79,80</sup> or a monograph.<sup>81</sup>

In this study, we used the Scikit-learn<sup>82</sup> as the implementation of the LIBSVM<sup>83</sup> with the radial basis function (RBF) kernel.

### Two-Layer Classification Framework

Inspired by the recent study,<sup>76</sup> we constructed a two-layer classification framework as done in Chou and Shen,<sup>84-86</sup> Wang et al.,<sup>87</sup> Xiao et al.,<sup>88-90</sup> and Shen and Chou.<sup>91-93</sup> The SVM model in the first-layer classifier was trained with S of Equation 1, serving to predict a query RNA sample as of piRNA or non-piRNA; the SVM model in the second layer was trained with  $S^+$  of Equation 1 to further identify whether the predicted piRNA sample is with the function of instructing target mRNA deadenylation. Shown in Figure 3 is a flowchart to illustrate how the two-layer classifier is working.

### Ensemble Learning

As we can see from Equations 5 and 6, the RNA sample defined by the PseKNC approach in this study contains three uncertain parameters:  $K$ ,  $\lambda$ , and  $w$ . In this study, the ranges considered for these parameters are

$$\left\{ \begin{array}{ll} 1 \leq K \leq 6 & \text{with step gap } \Delta K = 1 \\ 1 \leq \lambda \leq 17 & \text{with step gap } \Delta \lambda = 4 \\ 0.1 \leq w \leq 0.9 & \text{with step gap } \Delta w = 0.2 \end{array} \right. \quad (9)$$

**Table 3. The Normalized Values Obtained from Table 2 via the Standard Conversion of Equation 8**

| Dimer | Physicochemical Property |        |        |        |        |        |
|-------|--------------------------|--------|--------|--------|--------|--------|
|       | Rise                     | Roll   | Shift  | Slide  | Tilt   | Twist  |
| AA    | -0.862                   | -0.689 | -1.163 | 1.386  | -1.896 | -0.270 |
| AC    | -0.149                   | -1.698 | 1.545  | 0.510  | 0.555  | 0.347  |
| AG    | 0.565                    | 0.000  | -0.813 | 0.127  | 0.096  | -0.888 |
| AU    | -0.149                   | -0.643 | -0.988 | 0.894  | 1.015  | 0.965  |
| CA    | -1.931                   | 0.643  | 0.497  | 0.346  | 0.862  | -0.270 |
| CC    | 0.802                    | 0.092  | -0.551 | -1.407 | -0.211 | 0.347  |
| CG    | 0.565                    | 1.652  | 2.156  | -2.009 | -0.823 | -2.741 |
| CU    | 0.565                    | 0.000  | -0.813 | 0.127  | 0.096  | -0.888 |
| GA    | 1.515                    | 0.413  | 0.147  | -0.969 | 1.321  | 0.347  |
| GC    | -0.386                   | -1.102 | 0.147  | 0.729  | -0.670 | 2.201  |
| GG    | 0.802                    | 1.652  | -0.551 | -1.407 | -0.211 | 0.347  |
| GU    | -0.149                   | -1.698 | 1.545  | 0.510  | 0.555  | 0.347  |
| UA    | 0.089                    | 1.010  | -0.639 | 0.401  | -0.977 | 0.347  |
| UC    | 1.515                    | 0.413  | 0.147  | -0.969 | 1.321  | 0.347  |
| UG    | -1.931                   | 0.643  | 0.497  | 0.346  | 0.862  | -0.270 |
| UU    | -0.862                   | -0.689 | -1.163 | 1.386  | -1.896 | -0.270 |

In other words,  $K$  may be 1, 2, 3, 4, 5, and 6;  $\lambda$  may be 1, 5, 9, 13, 17, and 19;  $w$  may be 0.1, 0.3, 0.5, 0.7, and 0.9. Accordingly, there are a total of  $5 \times 6 \times 5 = 150$  individual classifiers for each layer.

Suppose each of these individual classifiers is expressed by  $C(i)$  ( $i = 1, 2, \dots, 150$ ), their ensemble classifier  $C^E$  can be formulated as

$$C^E = C(1) \forall C(2) C(3) \forall \dots \forall C(150) = \forall_{i=1}^{150} C(i), \quad (10)$$

where the symbol  $\forall$  denotes the fusing operator.<sup>32</sup> The ensemble predictor formed by fusing an array of individual predictors via a voting system can yield much better prediction quality, as demonstrated by a series of previous studies including signal peptide prediction,<sup>86,92</sup> membrane protein type classification,<sup>84,94</sup> protein subcellular location prediction,<sup>95,96</sup> protein fold pattern recognition,<sup>97</sup> enzyme functional classification,<sup>98</sup> protein-proteins interaction prediction,<sup>99</sup> protein-protein binding site identification,<sup>100</sup> and DNA recombination spot identification.<sup>68</sup>

Unfortunately, if all of the 150 classifiers in Equation 10 were directly used to form an ensemble predictor by the voting approach, it would be not only computationally inefficient, but also might reduce the success rate because of too much noise. One of the effective approaches is to select some key classifiers from them. To realize this, let us introduce the concept of “complementing degree” between two individual classifiers,  $C(i)$  and  $C(j)$ , or their “mutually strengthening degree,”  $D(i,j)$ , as defined below:

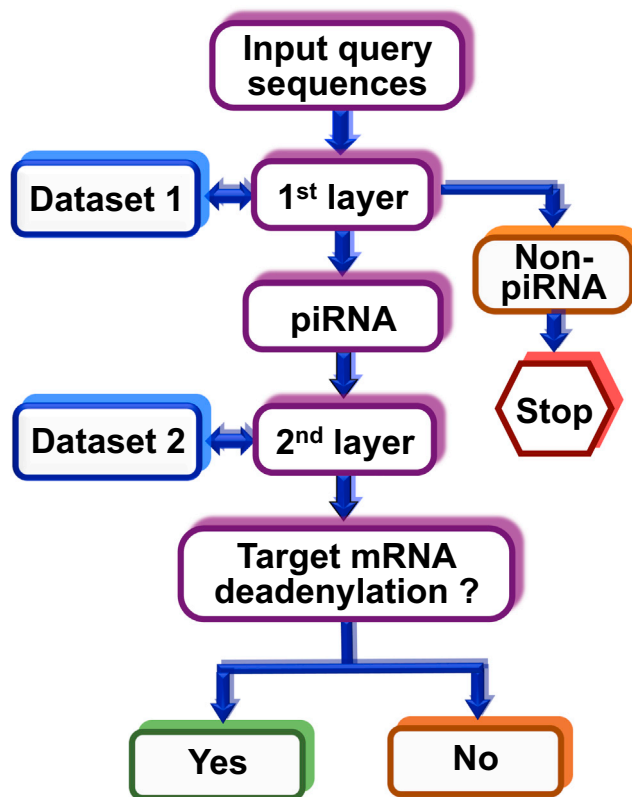**Figure 3. A Flowchart to Show How the 2L-piRNA Predictor Is Working**

The input query sequences are first identified by the first-layer sub-predictor as of piRNA or non-piRNA. Subsequently, the predicted or asserted piRNAs are further identified by the second-layer sub-predictor because they have the function to instruct target mRNA deadenylation or not. Dataset 1 and dataset 2 refer to  $S$  and  $S^+$  of Equation 1, respectively.

$$D(i,j) = 1 - \frac{1}{2m} \sum_{t=1}^m C_t(i,j) \quad (0 \leq D(i,j) \leq 1), \quad (11)$$

where  $m$  represents the number of training samples, and

$$C_t(i,j) = \begin{cases} p_t(i) + p_t(j), & \text{if both fail} \\ 0, & \text{otherwise} \end{cases} \quad (12)$$

In Equation 12,  $p_t(i)$  denotes the probability or output when applying the classifier  $C(i)$  on the  $t$ -th sample,  $p_t(j)$  the corresponding output for  $C(j)$ , and “both fail” means that both predicted results are incorrect.

By means of Equations 11 and 12, all of the 150 classifiers in each layer were clustered with the AP (affinity propagation) clustering algorithm<sup>101</sup> using the default parameters. Four clusters were thus obtained for each of the two layers. Subsequently, the classifiers in the four cluster centers were selected as the representative classifiers, respectively, that have the highest complementing/strengthening degrees, as illustrated by the flowchart in Figure 4. Suppose the four

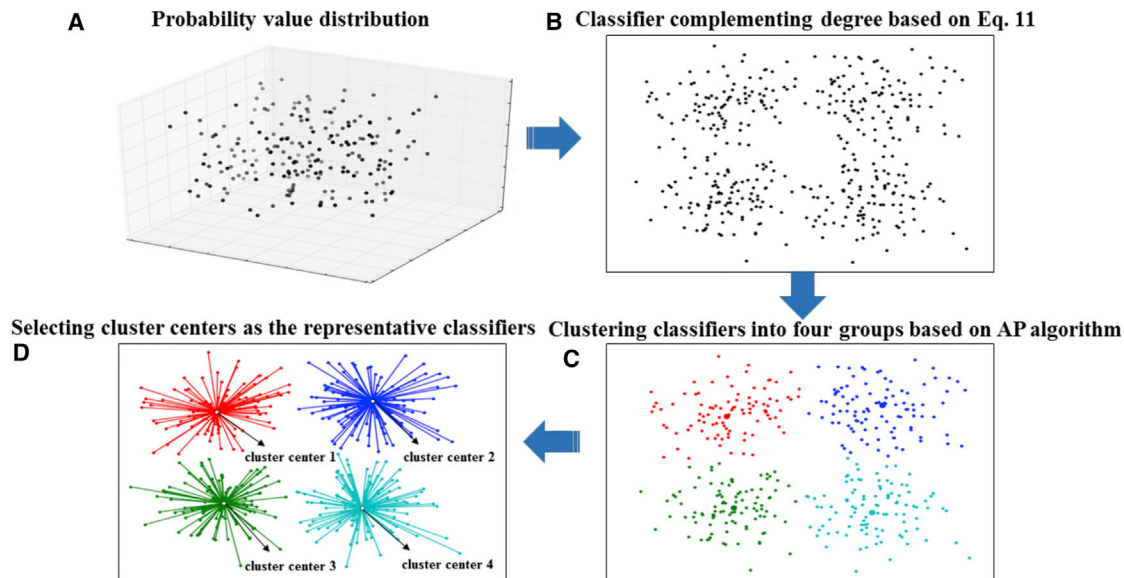

**Figure 4. A Flowchart to Show the Process of How to Select the Four Representative Classifiers in Equation 13 from the 150 Individual Basic Classifier in Equation 10 for the First and Second Layers, Respectively**

representative classifiers thus selected for the first and second layers are denoted by

$$\begin{cases} C^*(1st, 1), C^*(1st, 2), C^*(1st, 3), C^*(1st, 4) \\ C^*(2nd, 1), C^*(2nd, 2), C^*(2nd, 3), C^*(2nd, 4) \end{cases} \quad (13)$$

Listed in Table 4 are the detailed values of their parameters for the first and second layers, respectively. Thus, instead of Equation 10, the final ensemble classifier should be formulated as

$$C^E = \begin{cases} \bigvee_{i=1}^4 C^*(1st, i), & \text{for the 1st layer} \\ \bigvee_{i=1}^4 C^*(2nd, i), & \text{for the 2nd layer} \end{cases} \quad (14)$$

Note that different from the ensemble classifiers formed in Chou and Shen<sup>102-105</sup> and Qiu et al.,<sup>106,107</sup> the voting weighted factors  $V_w$  were included during the fusion process for each layer, and their optimal values can be easily derived by optimizing success rates during the validation process as shown in Table 4 (Voting Weighted Factor  $V_w$  column).

The predictor developed via the above procedures is called 2L-piRNA, where 2L represents the two-layer ensemble classifier and piRNA represents the piwi-interacting RNA and its function.

### Prediction Quality Measurement

How to measure the prediction quality is one of the five indispensable steps<sup>31</sup> in developing a new prediction method for a biological system. It consists of two issues: What scales should be used to measure the predictor's quality? And what test method should be adopted to score them? Below, let us address the two problems one by one.

### Formulation of Measurement Scales

The following metrics were widely used in the literature to measure the prediction quality from four different aspects: (1) Acc that was used for checking the overall accuracy of a predictor, (2) MCC for its stability, (3) Sn for its sensitivity, and (4) Sp for its specificity.<sup>108</sup>

Unfortunately, the four metrics' original formulations copied directly from mathematical books are difficult to understand for most biologists due to lack of intuitiveness. Fortunately, by using the scales defined by Chou<sup>109</sup> in studying signal peptides, Xu et al.<sup>110</sup> and Chen et al.<sup>55</sup> had successfully converted them into a set of intuitive equations that are much easier for most biologists to understand, as given below:

$$\begin{cases} Sn = 1 - \frac{N_-^+}{N^+} & 0 \leq Sn \leq 1 \\ Sp = 1 - \frac{N_+^-}{N^-} & 0 \leq Sp \leq 1 \\ Acc = 1 - \frac{N_-^+ + N_+^-}{N^+ + N^-} & 0 \leq Acc \leq 1 \\ MCC = \frac{1 - \left(\frac{N_+^+}{N^+} + \frac{N_+^-}{N^-}\right)}{\sqrt{\left(1 + \frac{N_+^- - N_-^+}{N^+}\right) \left(1 + \frac{N_+^+ - N_-^-}{N^-}\right)}} & -1 \leq MCC \leq 1 \end{cases} \quad (15)$$

where  $N^+$  represents the total number of the positive samples investigated, whereas  $N_+^+$  is the number of the positive samples incorrectly predicted to be negative, and  $N^-$  is the total number of the negative samples investigated, whereas  $N_+^-$  is the number of the negative samples incorrectly predicted to be positive.

**Table 4. List of the Four Individual Representative Base Classifiers Selected by Using the Affinity Propagation Clustering Algorithm<sup>101</sup> for Each of the Two Layers Concerned**

| Base Classifier     | Feature             | Dimension | Voting Weighted Factor $V_w$ | Acc (%) |
|---------------------|---------------------|-----------|------------------------------|---------|
| <b>First Layer</b>  |                     |           |                              |         |
| $C^*(1st, 1)$       | PseKNC <sup>a</sup> | 17        | 0.200                        | 84.1    |
| $C^*(1st, 2)$       | PseKNC <sup>b</sup> | 21        | 0.100                        | 84.0    |
| $C^*(1st, 3)$       | PseKNC <sup>c</sup> | 69        | 0.300                        | 84.6    |
| $C^*(1st, 4)$       | PseKNC <sup>d</sup> | 257       | 0.400                        | 82.1    |
| <b>Second Layer</b> |                     |           |                              |         |
| $C^*(2nd, 1)$       | PseKNC <sup>e</sup> | 17        | 0.100                        | 73.8    |
| $C^*(2nd, 2)$       | PseKNC <sup>f</sup> | 69        | 0.800                        | 77.0    |
| $C^*(2nd, 3)$       | PseKNC <sup>g</sup> | 4,101     | 0.000                        | 71.4    |
| $C^*(2nd, 4)$       | PseKNC <sup>h</sup> | 4,113     | 0.100                        | 70.1    |

<sup>a</sup>The optimal parameters were  $K = 2, \lambda = 1, w = 0.1, C = 2^7, \gamma = 2$ .

<sup>b</sup>The optimal parameters were  $K = 2, \lambda = 5, w = 0.3, C = 2^{15}, \gamma = 2^{-1}$ .

<sup>c</sup>The optimal parameters were  $K = 3, \lambda = 5, w = 0.1, C = 2^{13}, \gamma = 2^{-1}$ .

<sup>d</sup>The optimal parameters were  $K = 4, \lambda = 1, w = 0.3, C = 2^{13}, \gamma = 2^{-1}$ .

<sup>e</sup>The optimal parameters were  $K = 2, \lambda = 1, w = 0.9, C = 2^{13}, \gamma = 2$ .

<sup>f</sup>The optimal parameters were  $K = 3, \lambda = 5, w = 0.1, C = 2^9, \gamma = 2$ .

<sup>g</sup>The optimal parameters were  $K = 6, \lambda = 5, w = 0.7, C = 2^7, \gamma = 2^3$ .

<sup>h</sup>The optimal parameters were  $K = 6, \lambda = 17, w = 0.9, C = 2^{11}, \gamma = 2^3$ .

Based on the definition of Equation 15, the meanings of Sn, Sp, Acc, and MCC have become much more intuitive and easier to understand, as discussed and used in a series of recent studies in various biological areas (see, e.g., Jia et al.,<sup>35,36,99,100,111–113</sup> Liu et al.,<sup>37,75,114,115</sup> Xiao et al.,<sup>38</sup> Lin et al.,<sup>59</sup> Chen et al.,<sup>61,116</sup> Qiu et al.,<sup>106,107,117,118</sup> Xu et al.,<sup>119–122</sup> and Ding et al.<sup>123</sup>).

It should be pointed out, however, that for the multi-label systems (see, e.g., Xiao et al.,<sup>90</sup> Qiu et al.,<sup>118</sup> Xiao et al.,<sup>124</sup> Chou et al.,<sup>125</sup> Lin et al.,<sup>126</sup> and Cheng et al.<sup>127</sup>), a much more sophisticated set of scales is needed as elaborated by Chou.<sup>128</sup>

### Cross-Validation

There are three different cross-validation methods<sup>129</sup> that are widely used in literature: (1) jackknife test, (2) subsampling (or K-fold cross-validation) test, and (3) independent dataset test. Of these three, however, the jackknife is the least arbitrary that can always yield a unique outcome for a given benchmark dataset, as elaborated by Chou<sup>31</sup> and widely recognized and increasingly adopted by researchers to analyze the quality of various predictors (see, e.g., Kabir and Hayat,<sup>64</sup> Kumar et al.,<sup>73</sup> Chen et al.,<sup>78</sup> Ali and Hayat,<sup>130</sup> Khan et al.,<sup>131</sup> Mondal and Pai,<sup>132</sup> Dehzangi et al.,<sup>133</sup> Ahmad et al.,<sup>134</sup> Ju et al.,<sup>135</sup> and Behbahani et al.<sup>136</sup>). In this study, however, to reduce the computational time, we adopted the 5-fold cross-validation method for each layer in 2L-piRNA, as done by many investigators with SVM as the prediction engine. For each layer, the benchmark dataset was divided into five subsets; for each run, four subsets were used as the training set, and the remaining one was used as the test set to evaluate the performance. This process was repeated five times until each subset was

used as a test set once. To do this, we first randomly divided the benchmark datasets in Equation 1 into five subsets with approximately the same size. For instance, for the first benchmark dataset in Equation 1, we have

$$\begin{cases} S = S_1 \cup S_2 \cup S_3 \cup S_4 \cup S_5 = \bigcup_{i=1}^5 S_i \\ \emptyset = S_1 \cap S_2 \cap S_3 \cap S_4 \cap S_5 = \bigcap_{i=1}^5 S_i \end{cases} \quad (16)$$

where  $\cup$ ,  $\cap$ , and  $\emptyset$  represent the symbols for union, intersection, and

empty set in the set theory,<sup>95,137</sup> respectively, and

$$S_i = S_i^+ \cup S_i^- \quad (i = 1, 2, \dots, 5) \quad (17)$$

with

$$\begin{cases} |S_1^+| \approx |S_2^+| \approx |S_3^+| \approx |S_4^+| \approx |S_5^+| \\ |S_1^-| \approx |S_2^-| \approx |S_3^-| \approx |S_4^-| \approx |S_5^-| \end{cases}, \quad (18)$$

where  $|S_1^+|$  denotes the number of samples (or cardinalities) in  $S_1^+$ , and so forth.

Then, each of the five sub-benchmark datasets was singled out one by one and tested by the model trained with the remaining four sub-benchmark datasets. The cross-validation process was repeated five times, with their average as the final outcome. In other words, during the process of 5-fold cross-validation, both the training dataset and testing dataset were actually open, and each sub-benchmark dataset was in turn moved between the two. The 5-fold cross-validation test can exclude the “memory” effect, just like conducting five different independent dataset tests.

### Web Server and User Guide

In Chou's five-step rule<sup>31</sup> for developing a useful predictor, the last one is to establish a user-friendly web server. This not only represents the future direction for developing any computational methods,<sup>138</sup> but is also particularly important for most experimental scientists working in drug development.<sup>39</sup> Accordingly, as done in a series of recent studies,<sup>63,66,67,107,112,117,127,139–141</sup> the web server for 2L-piRNA has been established as well. Moreover, to maximize users' convenience, a step-by-step guide is provided below.

Step 1. Open the web server at <http://bioinformatics.hitsz.edu.cn/2L-piRNA/> and you will see its top page as shown in Figure 5. Click on the Read Me button to see a brief introduction about the server and the caveat when using it.

Step 2. You can either type or copy/paste the query RNA sequence into the input box. You can also directly upload your input data via the Browse button. The input sequence should be in the FASTA format. For the examples of sequences in the FASTA format, click the Example button right above the input box.

Step 3. Click on the Submit button to see the predicted results. For example, if you use the four query RNA sequences in the Example

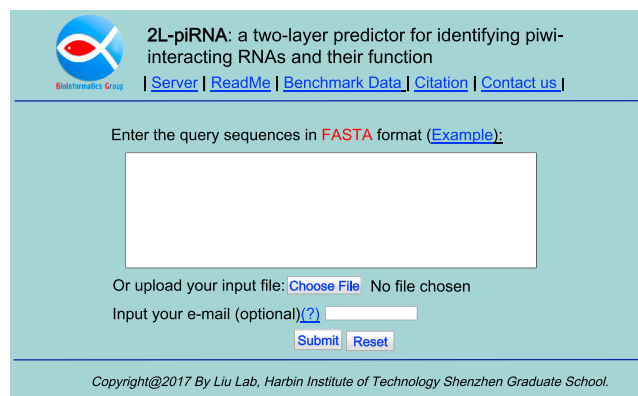

**2L-piRNA: a two-layer predictor for identifying piwi-interacting RNAs and their function**

Server | ReadMe | Benchmark Data | Citation | Contact us

Enter the query sequences in **FASTA** format ([Example](#)):

Or upload your input file: [Choose File](#) No file chosen

Input your e-mail (optional) (?)

[Submit](#) [Reset](#)

Copyright©2017 By Liu Lab, Harbin Institute of Technology Shenzhen Graduate School.

**Figure 5. A Semi-screen Shot to Show the Top Page of the Web Server 2L-piRNA**

Its website address is <http://bioinformatics.hitsz.edu.cn/2L-piRNA/>.

window as the input, you will see on your computer screen that the first and second query sequences are of non-piRNA. The third one is of piRNA with the function for instructing target mRNAs deadenylation. The fourth one is of piRNA, but without that function. All these predicted results are fully consistent with the experimental observations as reported in Gou et al.<sup>18</sup>

## SUPPLEMENTAL INFORMATION

Supplemental Information includes one data file and can be found with this article online at <http://dx.doi.org/10.1016/j.omtn.2017.04.008>.

## AUTHOR CONTRIBUTIONS

B.L. conceived of the study and designed the experiments, participated in drafting the manuscript and performing the statistical analysis. F.Y. participated in coding the experiments and drafting the manuscript. K.-C.C. participated in revising the manuscript. All authors read and approved the final manuscript.

## ACKNOWLEDGMENTS

The authors wish to thank the two anonymous reviewers, whose constructive comments were very helpful for strengthening the presentation of this paper. This work was supported by the National Natural Science Foundation of China (grant No. 61672184), the Natural Science Foundation of Guangdong Province (grant No. 2014A030313695), Guangdong Natural Science Funds for Distinguished Young Scholars (grant No. 2016A030306008), and Scientific Research Foundation in Shenzhen (grant No. JCYJ20150626110425228).

## REFERENCES

- Aravin, A., Gaidatzis, D., Pfeffer, S., Lagos-Quintana, M., Landgraf, P., Iovino, N., Morris, P., Brownstein, M.J., Kuramochi-Miyagawa, S., Nakano, T., et al. (2006). A novel class of small RNAs bind to MILI protein in mouse testes. *Nature* *442*, 203–207.
- Girard, A., Sachidanandam, R., Hannon, G.J., and Carmell, M.A. (2006). A germline-specific class of small RNAs binds mammalian Piwi proteins. *Nature* *442*, 199–202.
- Grivna, S.T., Beyret, E., Wang, Z., and Lin, H. (2006). A novel class of small RNAs in mouse spermatogenic cells. *Genes Dev.* *20*, 1709–1714.
- Lau, N.C., Seto, A.G., Kim, J., Kuramochi-Miyagawa, S., Nakano, T., Bartel, D.P., and Kingston, R.E. (2006). Characterization of the piRNA complex from rat testes. *Science* *313*, 363–367.
- Zhang, P., Kang, J.-Y., Gou, L.-T., Wang, J., Xue, Y., Skogerboe, G., Dai, P., Huang, D.W., Chen, R., Fu, X.D., et al. (2015). MIWI and piRNA-mediated cleavage of messenger RNAs in mouse testes. *Cell Res.* *25*, 193–207.
- Klattenhoff, C., and Theurkauf, W. (2008). Biogenesis and germline functions of piRNAs. *Development* *135*, 3–9.
- Beyret, E., and Lin, H. (2011). Pinpointing the expression of piRNAs and function of the PIWI protein subfamily during spermatogenesis in the mouse. *Dev. Biol.* *355*, 215–226.
- Mei, Y., Clark, D., and Mao, L. (2013). Novel dimensions of piRNAs in cancer. *Cancer Lett.* *336*, 46–52.
- Cheng, J., Deng, H., Xiao, B., Zhou, H., Zhou, F., Shen, Z., and Guo, J. (2012). piR-823, a novel non-coding small RNA, demonstrates in vitro and in vivo tumor suppressive activity in human gastric cancer cells. *Cancer Lett.* *315*, 12–17.
- Moyano, M., and Stefani, G. (2015). piRNA involvement in genome stability and human cancer. *J. Hematol. Oncol.* *8*, 38.
- Hashim, A., Rizzo, F., Marchese, G., Ravo, M., Tarallo, R., Nassa, G., Giurato, G., Santamaria, G., Cordella, A., Cantarella, C., and Weisz, A. (2014). RNA sequencing identifies specific PIWI-interacting small non-coding RNA expression patterns in breast cancer. *Oncotarget* *5*, 9901–9910.
- Lee, E.J., Banerjee, S., Zhou, H., Jammalamadaka, A., Arcila, M., Manjunath, B.S., and Kosik, K.S. (2011). Identification of piRNAs in the central nervous system. *RNA* *17*, 1090–1099.
- Nishibu, T., Hayashida, Y., Tani, S., Kuroki, S., Kojima-Kita, K., Ukekawa, R., Kurokawa, T., Kuramochi-Miyagawa, S., Nakano, T., Inoue, K., and Honda, S. (2012). Identification of MIWI-associated Poly(A) RNAs by immunoprecipitation with an anti-MIWI monoclonal antibody. *Biosci. Trends* *6*, 248–261.
- Zhang, Y., Wang, X., and Kang, L. (2011). A k-mer scheme to predict piRNAs and characterize locust piRNAs. *Bioinformatics* *27*, 771–776.
- Wang, K., Liang, C., Liu, J., Xiao, H., Huang, S., Xu, J., and Li, F. (2014). Prediction of piRNAs using transposon interaction and a support vector machine. *BMC Bioinformatics* *15*, 419.
- Luo, L., Li, D., Zhang, W., Tu, S., Zhu, X., and Tian, G. (2016). Accurate prediction of transposon-derived piRNAs by integrating various sequential and physicochemical features. *PLoS ONE* *11*, e0153268.
- Li, D., Luo, L., Zhang, W., Liu, F., and Luo, F. (2016). A genetic algorithm-based weighted ensemble method for predicting transposon-derived piRNAs. *BMC Bioinformatics* *17*, 329.
- Gou, L.-T., Dai, P., Yang, J.-H., Xue, Y., Hu, Y.P., Zhou, Y., Kang, J.Y., Wang, X., Li, H., Hua, M.M., et al. (2014). Pachytene piRNAs instruct massive mRNA elimination during late spermiogenesis. *Cell Res.* *24*, 680–700.
- Chou, K.-C., Jiang, S.-P., Liu, W.-M., and Fee, C.-H. (1979). Graph theory of enzyme kinetics: 1. Steady-state reaction system. *Sci. Sin.* *22*, 341–358.
- Chou, K.C., and Forsén, S. (1980). Graphical rules for enzyme-catalysed rate laws. *Biochem. J.* *187*, 829–835.
- Zhou, G.P., and Deng, M.H. (1984). An extension of Chou's graphic rules for deriving enzyme kinetic equations to systems involving parallel reaction pathways. *Biochem. J.* *222*, 169–176.
- Chou, K.C. (1989). Graphic rules in steady and non-steady state enzyme kinetics. *J. Biol. Chem.* *264*, 12074–12079.
- Althaus, I.W., Gonzales, A.J., Chou, J.J., Romero, D.L., Deibel, M.R., Chou, K.C., Kezdy, F.J., Resnick, L., Busso, M.E., So, A.G., et al. (1993). The quinoline U-78036 is a potent inhibitor of HIV-1 reverse transcriptase. *J. Biol. Chem.* *268*, 14875–14880.
- Althaus, I.W., Chou, J.J., Gonzales, A.J., Deibel, M.R., Chou, K.C., Kezdy, F.J., Romero, D.L., Palmer, J.R., Thomas, R.C., Aristoff, P.A., et al. (1993). Kinetic studies



- with the non-nucleoside HIV-1 reverse transcriptase inhibitor U-88204E. *Biochemistry* 32, 6548–6554.
25. Wu, Z.C., Xiao, X., and Chou, K.C. (2010). 2D-MH: a web-server for generating graphic representation of protein sequences based on the physicochemical properties of their constituent amino acids. *J. Theor. Biol.* 267, 29–34.
  26. Chou, K.-C., Lin, W.Z., and Xiao, X. (2011). Wenxiang: a web-server for drawing wenxiang diagrams. *Nat. Sci.* 3, 862–865.
  27. Zhou, G.P. (2011). The disposition of the LZCC protein residues in wenxiang diagram provides new insights into the protein-protein interaction mechanism. *J. Theor. Biol.* 284, 142–148.
  28. Zhou, G.P., Chen, D., Liao, S., and Huang, R.B. (2016). Recent progresses in studying helix-helix interactions in proteins by incorporating the Wenxiang diagram into the NMR spectroscopy. *Curr. Top. Med. Chem.* 16, 581–590.
  29. Fawcett, J.A. (2006). An introduction to ROC analysis. *Pattern Recognit. Lett.* 27, 861–874.
  30. Davis, J., and Goadrich, M. (2006). The relationship between precision-recall and ROC curves. In *Proceedings of the 23rd International Conference on Machine Learning (ACM)*, pp. 233–240.
  31. Chou, K.C. (2011). Some remarks on protein attribute prediction and pseudo amino acid composition. *J. Theor. Biol.* 273, 236–247.
  32. Chou, K.C., and Shen, H.B. (2007). Recent progress in protein subcellular location prediction. *Anal. Biochem.* 370, 1–16.
  33. Zhang, P., Si, X., Skogerbø, G., Wang, J., Cui, D., Li, Y., Sun, X., Liu, L., Sun, B., Chen, R., et al. (2014). piRBase: a web resource assisting piRNA functional study. *Database (Oxford)* 2014, bau110.
  34. Bu, D., Yu, K., Sun, S., Xie, C., Skogerbø, G., Miao, R., Xiao, H., Liao, Q., Luo, H., Zhao, G., et al. (2012). NONCODE v3.0: integrative annotation of long noncoding RNAs. *Nucleic Acids Res.* 40, D210–D215.
  35. Jia, J., Liu, Z., Xiao, X., Liu, B., and Chou, K.C. (2016). iPPBS-Opt: a sequence-based ensemble classifier for identifying protein-protein binding sites by optimizing imbalanced training datasets. *Molecules* 21, E95.
  36. Jia, J., Liu, Z., Xiao, X., Liu, B., and Chou, K.C. (2016). iSuc-PseOpt: identifying lysine succinylation sites in proteins by incorporating sequence-coupling effects into pseudo components and optimizing imbalanced training dataset. *Anal. Biochem.* 497, 48–56.
  37. Liu, Z., Xiao, X., Qiu, W.R., and Chou, K.C. (2015). iDNA-methyl: identifying DNA methylation sites via pseudo trinucleotide composition. *Anal. Biochem.* 474, 69–77.
  38. Xiao, X., Min, J.L., Lin, W.Z., Liu, Z., Cheng, X., and Chou, K.C. (2015). iDrug-Target: predicting the interactions between drug compounds and target proteins in cellular networking via benchmark dataset optimization approach. *J. Biomol. Struct. Dyn.* 33, 2221–2233.
  39. Chou, K.C. (2015). Impacts of bioinformatics to medicinal chemistry. *Med. Chem.* 11, 218–234.
  40. Chou, K.C. (2001). Prediction of protein cellular attributes using pseudo-amino acid composition. *Proteins* 43, 246–255.
  41. Chou, K.C. (2005). Using amphiphilic pseudo amino acid composition to predict enzyme subfamily classes. *Bioinformatics* 21, 10–19.
  42. Shen, H.B., and Chou, K.C. (2008). PseAAC: a flexible web server for generating various kinds of protein pseudo amino acid composition. *Anal. Biochem.* 373, 386–388.
  43. Du, P., Wang, X., Xu, C., and Gao, Y. (2012). PseAAC-Builder: a cross-platform stand-alone program for generating various special Chou's pseudo-amino acid compositions. *Anal. Biochem.* 425, 117–119.
  44. Cao, D.S., Xu, Q.S., and Liang, Y.Z. (2013). propy: a tool to generate various modes of Chou's PseAAC. *Bioinformatics* 29, 960–962.
  45. Du, P., Gu, S., and Jiao, Y. (2014). PseAAC-General: fast building various modes of general form of Chou's pseudo-amino acid composition for large-scale protein datasets. *Int. J. Mol. Sci.* 15, 3495–3506.
  46. Lin, S.X., and Lapointe, J. (2013). Theoretical and experimental biology in one—a symposium in honour of Professor Kuo-Chen Chou's 50th anniversary and Professor Richard Giegé's 40th anniversary of their scientific careers. *J. Biomed. Sci. Eng.* 6, 435–442.
  47. Chou, K.C. (2009). Pseudo amino acid composition and its applications in bioinformatics, proteomics and system biology. *Curr. Proteomics* 6, 262–274.
  48. Khan, M., Hayat, M., Khan, S.A., and Iqbal, N. (2017). Unb-DPC: identify mycobacterial membrane protein types by incorporating un-biased dipeptide composition into Chou's general PseAAC. *J. Theor. Biol.* 415, 13–19.
  49. Meher, P.K., Sahu, T.K., Saini, V., and Rao, A.R. (2017). Predicting antimicrobial peptides with improved accuracy by incorporating the compositional, physicochemical and structural features into Chou's general PseAAC. *Sci. Rep.* 7, 42362.
  50. Chen, W., Lei, T.Y., Jin, D.C., Lin, H., and Chou, K.C. (2014). PseKNC: a flexible web server for generating pseudo K-tuple nucleotide composition. *Anal. Biochem.* 456, 53–60.
  51. Chen, W., Zhang, X., Brooker, J., Lin, H., Zhang, L., and Chou, K.C. (2015). PseKNC-General: a cross-platform package for generating various modes of pseudo nucleotide compositions. *Bioinformatics* 31, 119–120.
  52. Liu, B., Liu, F., Fang, L., Wang, X., and Chou, K.C. (2015). repDNA: a Python package to generate various modes of feature vectors for DNA sequences by incorporating user-defined physicochemical properties and sequence-order effects. *Bioinformatics* 31, 1307–1309.
  53. Liu, B., Liu, F., Fang, L., Wang, X., and Chou, K.C. (2016). repRNA: a web server for generating various feature vectors of RNA sequences. *Mol. Genet. Genomics* 291, 473–481.
  54. Liu, B., Liu, F., Wang, X., Chen, J., Fang, L., and Chou, K.C. (2015). Pse-in-One: a web server for generating various modes of pseudo components of DNA, RNA, and protein sequences. *Nucleic Acids Res.* 43 (W1), W65–W71.
  55. Chen, W., Feng, P.M., Lin, H., and Chou, K.C. (2013). iRSpot-PseDNC: identify recombination spots with pseudo dinucleotide composition. *Nucleic Acids Res.* 41, e68.
  56. Qiu, W.R., Xiao, X., and Chou, K.C. (2014). iRSpot-TNCPseAAC: identify recombination spots with trinucleotide composition and pseudo amino acid components. *Int. J. Mol. Sci.* 15, 1746–1766.
  57. Chen, W., Feng, P.M., Lin, H., and Chou, K.C. (2014). iSS-PseDNC: identifying splicing sites using pseudo dinucleotide composition. *BioMed Res. Int.* 2014, 623149.
  58. Guo, S.H., Deng, E.Z., Xu, L.Q., Ding, H., Lin, H., Chen, W., and Chou, K.C. (2014). iNuc-PseKNC: a sequence-based predictor for predicting nucleosome positioning in genomes with pseudo k-tuple nucleotide composition. *Bioinformatics* 30, 1522–1529.
  59. Lin, H., Deng, E.Z., Ding, H., Chen, W., and Chou, K.C. (2014). iPro54-PseKNC: a sequence-based predictor for identifying sigma-54 promoters in prokaryote with pseudo k-tuple nucleotide composition. *Nucleic Acids Res.* 42, 12961–12972.
  60. Chen, W., Feng, P.M., Deng, E.Z., Lin, H., and Chou, K.C. (2014). iTIS-PseTNC: a sequence-based predictor for identifying translation initiation site in human genes using pseudo trinucleotide composition. *Anal. Biochem.* 462, 76–83.
  61. Chen, W., Feng, P., Ding, H., Lin, H., and Chou, K.C. (2015). iRNA-Methyl: identifying N(6)-methyladenosine sites using pseudo nucleotide composition. *Anal. Biochem.* 490, 26–33.
  62. Liu, B., Fang, L., Liu, F., Wang, X., and Chou, K.C. (2016). iMiRNA-PseDPC: microRNA precursor identification with a pseudo distance-pair composition approach. *J. Biomol. Struct. Dyn.* 34, 223–235.
  63. Xiao, X., Ye, H.X., Liu, Z., Jia, J.H., and Chou, K.C. (2016). iROS-gPseKNC: predicting replication origin sites in DNA by incorporating dinucleotide position-specific propensity into general pseudo nucleotide composition. *Oncotarget* 7, 34180–34189.
  64. Kabir, M., and Hayat, M. (2016). iRSpot-GAEnSC: identifying recombination spots via ensemble classifier and extending the concept of Chou's PseAAC to formulate DNA samples. *Mol. Genet. Genomics* 291, 285–296.
  65. Tahir, M., and Hayat, M. (2016). iNuc-STNC: a sequence-based predictor for identification of nucleosome positioning in genomes by extending the concept of SAAC and Chou's PseAAC. *Mol. Biosyst.* 12, 2587–2593.

66. Chen, W., Feng, P., Yang, H., Ding, H., Lin, H., and Chou, K.C. (2017). iRNA-AI: identifying the adenosine to inosine editing sites in RNA sequences. *Oncotarget* 8, 4208–4217.
67. Zhang, C.J., Tang, H., Li, W.C., Lin, H., Chen, W., and Chou, K.C. (2016). iOri-Human: identify human origin of replication by incorporating dinucleotide physicochemical properties into pseudo nucleotide composition. *Oncotarget* 7, 69783–69793.
68. Liu, B., Wang, S., Long, R., and Chou, K.C. (2017). iRSpot-EL: identify recombination spots with an ensemble learning approach. *Bioinformatics* 33, 35–41.
69. Chen, W., Lin, H., and Chou, K.C. (2015). Pseudo nucleotide composition or PseKNC: an effective formulation for analyzing genomic sequences. *Mol. Biosyst.* 11, 2620–2634.
70. Feng, P.M., Chen, W., Lin, H., and Chou, K.C. (2013). iHSP-PseRAAAC: identifying the heat shock protein families using pseudo reduced amino acid alphabet composition. *Anal. Biochem.* 442, 118–125.
71. Han, G.S., Yu, Z.G., and Anh, V. (2014). A two-stage SVM method to predict membrane protein types by incorporating amino acid classifications and physicochemical properties into a general form of Chou's PseAAC. *J. Theor. Biol.* 344, 31–39.
72. Liu, B., Zhang, D., Xu, R., Xu, J., Wang, X., Chen, Q., Dong, Q., and Chou, K.C. (2014). Combining evolutionary information extracted from frequency profiles with sequence-based kernels for protein remote homology detection. *Bioinformatics* 30, 472–479.
73. Kumar, R., Srivastava, A., Kumari, B., and Kumar, M. (2015). Prediction of  $\beta$ -lactamase and its class by Chou's pseudo-amino acid composition and support vector machine. *J. Theor. Biol.* 365, 96–103.
74. Qiu, W.R., Xiao, X., Lin, W.Z., and Chou, K.C. (2015). iUbiq-Lys: prediction of lysine ubiquitination sites in proteins by extracting sequence evolution information via a gray system model. *J. Biomol. Struct. Dyn.* 33, 1731–1742.
75. Liu, B., Fang, L., Wang, S., Wang, X., Li, H., and Chou, K.C. (2015). Identification of microRNA precursor with the degenerate K-tuple or Kmer strategy. *J. Theor. Biol.* 385, 153–159.
76. Liu, B., Fang, L., Long, R., Lan, X., and Chou, K.C. (2016). iEnhancer-2L: a two-layer predictor for identifying enhancers and their strength by pseudo k-tuple nucleotide composition. *Bioinformatics* 32, 362–369.
77. Rahimi, M., Bakhtiarzadeh, M.R., and Mohammadi-Sangcheshmeh, A. (2017). Oogenesis\_Pred: a sequence-based method for predicting oogenesis proteins by six different modes of Chou's pseudo amino acid composition. *J. Theor. Biol.* 414, 128–136.
78. Chen, J., Long, R., Wang, X.L., Liu, B., and Chou, K.C. (2016). dRHP-PseRA: detecting remote homology proteins using profile-based pseudo protein sequence and rank aggregation. *Sci. Rep.* 6, 32333.
79. Chou, K.C., and Cai, Y.D. (2002). Using functional domain composition and support vector machines for prediction of protein subcellular location. *J. Biol. Chem.* 277, 45765–45769.
80. Cai, Y.D., Zhou, G.P., and Chou, K.C. (2003). Support vector machines for predicting membrane protein types by using functional domain composition. *Biophys. J.* 84, 3257–3263.
81. Cristianini, N., and Shawe-Taylor, J. (2000). *An Introduction to Support Vector Machines and Other Kernel-based Learning Methods* (Cambridge University Press).
82. Pedregosa, F., Varoquaux, G., Gramfort, A., Michel, V., Thirion, B., Grisel, O., Blondel, M., Prettenhofer, P., Weiss, R., Dubourg, V., et al. (2011). Scikit-learn: machine learning in Python. *J. Mach. Learn. Res.* 12, 2825–2830.
83. Chang, C.C., and Lin, C.J. (2011). LIBSVM: a library for support vector machines. *ACM Trans. Intell. Syst. Technol.* 2, 1–27.
84. Chou, K.C., and Shen, H.B. (2007). MemType-2L: a web server for predicting membrane proteins and their types by incorporating evolution information through PsePSSM. *Biochem. Biophys. Res. Commun.* 360, 339–345.
85. Chou, K.C., and Shen, H.B. (2008). ProtIdent: a web server for identifying proteases and their types by fusing functional domain and sequential evolution information. *Biochem. Biophys. Res. Commun.* 376, 321–325.
86. Chou, K.C., and Shen, H.B. (2007). Signal-CF: a subsite-coupled and window-fusing approach for predicting signal peptides. *Biochem. Biophys. Res. Commun.* 357, 633–640.
87. Wang, P., Xiao, X., and Chou, K.C. (2011). NR-2L: a two-level predictor for identifying nuclear receptor subfamilies based on sequence-derived features. *PLoS ONE* 6, e23505.
88. Xiao, X., Wang, P., and Chou, K.C. (2011). GPCR-2L: predicting G protein-coupled receptors and their types by hybridizing two different modes of pseudo amino acid compositions. *Mol. Biosyst.* 7, 911–919.
89. Xiao, X., Wang, P., and Chou, K.C. (2011). Quat-2L: a web-server for predicting protein quaternary structural attributes. *Mol. Divers.* 15, 149–155.
90. Xiao, X., Wang, P., Lin, W.Z., Jia, J.H., and Chou, K.C. (2013). iAMP-2L: a two-level multi-label classifier for identifying antimicrobial peptides and their types. *Anal. Biochem.* 436, 168–177.
91. Shen, H.B., and Chou, K.C. (2009). QuatIdent: a web server for identifying protein quaternary structural attribute by fusing functional domain and sequential evolution information. *J. Proteome Res.* 8, 1577–1584.
92. Shen, H.B., and Chou, K.C. (2007). Signal-3L: a 3-layer approach for predicting signal peptides. *Biochem. Biophys. Res. Commun.* 363, 297–303.
93. Shen, H.B., and Chou, K.C. (2009). Identification of proteases and their types. *Anal. Biochem.* 385, 153–160.
94. Shen, H.B., and Chou, K.C. (2007). Using ensemble classifier to identify membrane protein types. *Amino Acids* 32, 483–488.
95. Chou, K.C., and Shen, H.B. (2006). Hum-PLoc: a novel ensemble classifier for predicting human protein subcellular localization. *Biochem. Biophys. Res. Commun.* 347, 150–157.
96. Shen, H.B., and Chou, K.C. (2007). Gpos-PLoc: an ensemble classifier for predicting subcellular localization of Gram-positive bacterial proteins. *Protein Eng. Des. Sel.* 20, 39–46.
97. Shen, H.B., and Chou, K.C. (2006). Ensemble classifier for protein fold pattern recognition. *Bioinformatics* 22, 1717–1722.
98. Shen, H.B., and Chou, K.C. (2007). EzyPred: a top-down approach for predicting enzyme functional classes and subclasses. *Biochem. Biophys. Res. Commun.* 364, 53–59.
99. Jia, J., Liu, Z., Xiao, X., Liu, B., and Chou, K.C. (2015). iPPI-Esml: an ensemble classifier for identifying the interactions of proteins by incorporating their physicochemical properties and wavelet transforms into PseAAC. *J. Theor. Biol.* 377, 47–56.
100. Jia, J., Liu, Z., Xiao, X., Liu, B., and Chou, K.C. (2016). Identification of protein-protein binding sites by incorporating the physicochemical properties and stationary wavelet transforms into pseudo amino acid composition. *J. Biomol. Struct. Dyn.* 34, 1946–1961.
101. Frey, B.J., and Dueck, D. (2007). Clustering by passing messages between data points. *Science* 315, 972–976.
102. Chou, K.C., and Shen, H.B. (2006). Large-scale predictions of gram-negative bacterial protein subcellular locations. *J. Proteome Res.* 5, 3420–3428.
103. Chou, K.C., and Shen, H.B. (2007). Euk-mPLoc: a fusion classifier for large-scale eukaryotic protein subcellular location prediction by incorporating multiple sites. *J. Proteome Res.* 6, 1728–1734.
104. Chou, K.C., and Shen, H.B. (2007). Large-scale plant protein subcellular location prediction. *J. Cell. Biochem.* 100, 665–678.
105. Chou, K.C., and Shen, H.B. (2010). A new method for predicting the subcellular localization of eukaryotic proteins with both single and multiple sites: Euk-mPLoc 2.0. *PLoS ONE* 5, e9931.
106. Qiu, W.R., Sun, B.Q., Xiao, X., Xu, D., and Chou, K.C. (2016). iPhos-PseEvo: identifying human phosphorylated proteins by incorporating evolutionary information into general PseAAC via grey system theory. *Mol. Inform.*, Published online May 12, 2006. <http://dx.doi.org/10.1002/minf.201600010>.
107. Qiu, W.R., Xiao, X., Xu, Z.C., and Chou, K.C. (2016). iPhos-PseEn: identifying phosphorylation sites in proteins by fusing different pseudo components into an ensemble classifier. *Oncotarget* 7, 51270–51283.

108. Chen, J., Liu, H., Yang, J., and Chou, K.C. (2007). Prediction of linear B-cell epitopes using amino acid pair antigenicity scale. *Amino Acids* 33, 423–428.
109. Chou, K.C. (2001). Using subsite coupling to predict signal peptides. *Protein Eng.* 14, 75–79.
110. Xu, Y., Ding, J., Wu, L.Y., and Chou, K.C. (2013). iSNO-PseAAC: predict cysteine S-nitrosylation sites in proteins by incorporating position specific amino acid propensity into pseudo amino acid composition. *PLoS ONE* 8, e55844.
111. Jia, J., Liu, Z., Xiao, X., Liu, B., and Chou, K.C. (2016). pSuc-Lys: predict lysine succinylation sites in proteins with PseAAC and ensemble random forest approach. *J. Theor. Biol.* 394, 223–230.
112. Jia, J., Liu, Z., Xiao, X., Liu, B., and Chou, K.C. (2016). iCar-PseCp: identify carbonylation sites in proteins by Monte Carlo sampling and incorporating sequence coupled effects into general PseAAC. *Oncotarget* 7, 34558–34570.
113. Jia, J., Zhang, L., Liu, Z., Xiao, X., and Chou, K.C. (2016). pSumo-CD: predicting sumoylation sites in proteins with covariance discriminant algorithm by incorporating sequence-coupled effects into general PseAAC. *Bioinformatics* 32, 3133–3141.
114. Liu, B., Fang, L., Liu, F., Wang, X., Chen, J., and Chou, K.C. (2015). Identification of real microRNA precursors with a pseudo structure status composition approach. *PLoS ONE* 10, e0121501.
115. Liu, Z., Xiao, X., Yu, D.J., Jia, J., Qiu, W.R., and Chou, K.C. (2016). pRNAm-PC: predicting N(6)-methyladenosine sites in RNA sequences via physical-chemical properties. *Anal. Biochem.* 497, 60–67.
116. Chen, W., Feng, P., Ding, H., Lin, H., and Chou, K.C. (2016). Using deformation energy to analyze nucleosome positioning in genomes. *Genomics* 107, 69–75.
117. Qiu, W.R., Sun, B.Q., Xiao, X., Xu, Z.C., and Chou, K.C. (2016). iHyd-PseCp: identify hydroxyproline and hydroxylysine in proteins by incorporating sequence-coupled effects into general PseAAC. *Oncotarget* 7, 44310–44321.
118. Qiu, W.R., Sun, B.Q., Xiao, X., Xu, Z.C., and Chou, K.C. (2016). iPTM-mLys: identifying multiple lysine PTM sites and their different types. *Bioinformatics* 32, 3116–3123.
119. Xu, Y., Shao, X.J., Wu, L.Y., Deng, N.Y., and Chou, K.C. (2013). iSNO-AAPair: incorporating amino acid pairwise coupling into PseAAC for predicting cysteine S-nitrosylation sites in proteins. *PeerJ* 1, e171.
120. Xu, Y., and Chou, K.C. (2016). Recent progress in predicting posttranslational modification sites in proteins. *Curr. Top. Med. Chem.* 16, 591–603.
121. Xu, Y., Wen, X., Shao, X.J., Deng, N.Y., and Chou, K.C. (2014). iHyd-PseAAC: predicting hydroxyproline and hydroxylysine in proteins by incorporating dipeptide position-specific propensity into pseudo amino acid composition. *Int. J. Mol. Sci.* 15, 7594–7610.
122. Xu, Y., Wen, X., Wen, L.S., Wu, L.Y., Deng, N.Y., and Chou, K.C. (2014). iNitro-Tyr: prediction of nitrotyrosine sites in proteins with general pseudo amino acid composition. *PLoS ONE* 9, e105018.
123. Ding, H., Deng, E.Z., Yuan, L.F., Liu, L., Lin, H., Chen, W., and Chou, K.C. (2014). iCTX-type: a sequence-based predictor for identifying the types of conotoxins in targeting ion channels. *BioMed Res. Int.* 2014, 286419.
124. Xiao, X., Wu, Z.C., and Chou, K.C. (2011). iLoc-Virus: a multi-label learning classifier for identifying the subcellular localization of virus proteins with both single and multiple sites. *J. Theor. Biol.* 284, 42–51.
125. Chou, K.C., Wu, Z.C., and Xiao, X. (2012). iLoc-Hum: using the accumulation-label scale to predict subcellular locations of human proteins with both single and multiple sites. *Mol. Biosyst.* 8, 629–641.
126. Lin, W.Z., Fang, J.A., Xiao, X., and Chou, K.C. (2013). iLoc-Animal: a multi-label learning classifier for predicting subcellular localization of animal proteins. *Mol. Biosyst.* 9, 634–644.
127. Cheng, X., Zhao, S.G., Xiao, X., and Chou, K.C. (2016). iATC-mISF: a multi-label classifier for predicting the classes of anatomical therapeutic chemicals. *Bioinformatics* 33, 341–346.
128. Chou, K.C. (2013). Some remarks on predicting multi-label attributes in molecular biosystems. *Mol. Biosyst.* 9, 1092–1100.
129. Chou, K.C., and Zhang, C.T. (1995). Prediction of protein structural classes. *Crit. Rev. Biochem. Mol. Biol.* 30, 275–349.
130. Ali, F., and Hayat, M. (2015). Classification of membrane protein types using Voting Feature Interval in combination with Chou's Pseudo Amino Acid Composition. *J. Theor. Biol.* 384, 78–83.
131. Khan, Z.U., Hayat, M., and Khan, M.A. (2015). Discrimination of acidic and alkaline enzyme using Chou's pseudo amino acid composition in conjunction with probabilistic neural network model. *J. Theor. Biol.* 365, 197–203.
132. Mondal, S., and Pai, P.P. (2014). Chou's pseudo amino acid composition improves sequence-based antifreeze protein prediction. *J. Theor. Biol.* 356, 30–35.
133. Dehngangi, A., Heffernan, R., Sharma, A., Lyons, J., Paliwal, K., and Sattar, A. (2015). Gram-positive and Gram-negative protein subcellular localization by incorporating evolutionary-based descriptors into Chou's general PseAAC. *J. Theor. Biol.* 364, 284–294.
134. Ahmad, K., Waris, M., and Hayat, M. (2016). Prediction of protein submitochondrial locations by incorporating dipeptide composition into Chou's general pseudo amino acid composition. *J. Membr. Biol.* 249, 293–304.
135. Ju, Z., Cao, J.Z., and Gu, H. (2016). Predicting lysine phosphoglycerylation with fuzzy SVM by incorporating k-spaced amino acid pairs into Chou's general PseAAC. *J. Theor. Biol.* 397, 145–150.
136. Behbahani, M., Mohabatkar, H., and Nosrati, M. (2016). Analysis and comparison of lignin peroxidases between fungi and bacteria using three different modes of Chou's general pseudo amino acid composition. *J. Theor. Biol.* 411, 1–5.
137. Chou, K.C., and Shen, H.B. (2006). Predicting eukaryotic protein subcellular location by fusing optimized evidence-theoretic K-Nearest Neighbor classifiers. *J. Proteome Res.* 5, 1888–1897.
138. Shen, H.B. (2009). Review: recent advances in developing web-servers for predicting protein attributes. *Nat. Sci.* 1, 63–92.
139. Chen, W., Ding, H., Feng, P., Lin, H., and Chou, K.C. (2016). iACP: a sequence-based tool for identifying anticancer peptides. *Oncotarget* 7, 16895–16909.
140. Chen, W., Tang, H., Ye, J., Lin, H., and Choi, K.-C. (2016). iRNA-PseU: identifying RNA pseudouridine sites. *Mol. Ther. Nucleic Acids* 5, e332.
141. Liu, B., Wu, H., Zhang, D., Wang, X., and Chou, K.C. (2017). Pse-Analysis: a python package for DNA/RNA and protein/peptide sequence analysis based on pseudo components and kernel methods. *Oncotarget* 8, 4208–4217.
142. Pérez, A., Noy, A., Lankas, F., Luque, F.J., and Orozco, M. (2004). The relative flexibility of B-DNA and A-RNA duplexes: database analysis. *Nucleic Acids Res.* 32, 6144–6151.

OMTN, Volume 7

## **Supplemental Information**

### **2L-piRNA: A Two-Layer Ensemble Classifier for Identifying Piwi-Interacting RNAs and Their Function**

**Bin Liu, Fan Yang, and Kuo-Chen Chou**

**Supporting Information S1. The benchmark dataset  $S$  constructed for identifying piRNA sequences and their functions.** It is formed by three subsets: (1)  $S_{inst}^+$  contains 709 piRNA samples having the function of instructing target mRNA deadenylation; (2)  $S_{non-inst}^+$  contains 709 piRNA samples without the function of instructing target mRNA deadenylation; (3)  $S^-$  contains 1,418 non-piRNA samples. See Eq.1 and the relevant text for further explanation.

---

(1) List of 709 samples in  $S_{inst}^+$

```

>piR-mmu-73208
UGGUUGUUUCUCUGACUCCUUGAGUAGAA
>piR-mmu-144728
UGACUGUGUGGCUCCACUGGCAAGGGCGGU
>piR-mmu-73976
UAACUAGAGAACUGGUCAGGUCUGAGGUG
>piR-mmu-20429
UCAAUUGGUUGAGUGUUUGUCUGGCAUUC
>piR-mmu-5128
UGGAUGUGAGAUAGAUAGGAGAAGGAAGUC
>piR-mmu-73824
UGGACAAAUGGACUGUGGAUCCAGGAGAGG
>piR-mmu-73165
UAGACAUGUAGUGAUCCUGAGGCAGGCAA
>piR-mmu-49159227
UGAAACUGGAGCAGAAAGAUAGGACCUGAGU
>piR-mmu-79777
UCUGAGAGAAAAGGAAGGUGGACUGAGAA
>piR-mmu-42183
UCUGCAGGCAGAACACUUGGAUCCUCUCU
>piR-mmu-16420
UGCAACAUGUAAGGCUGACUAAGAAUACGG
>piR-mmu-44903
UAGGAUGCAAUGAUGCAAUGAAGGUGAUGU
>piR-mmu-944000
UGAGCCAAAGCUAAAAGCUCAGGUCGUUGA
>piR-mmu-49614606
UUC CAGUCAUGGAUAUGAUUGCUGGGCUGU
>piR-mmu-66813
UCCCAUCGUUAGGGCCACAAGGUAGGAGC
>piR-mmu-25496
UGAGAUGACGUUGUAGAUGAAAUGGUUAA
>piR-mmu-32805
UGGAAAGUGAGCUAGAAUUUCGGUUGGCCUU
>piR-mmu-50187109
GCCUGAGAAUCUGAGUGGAGUUGGGAUGU

```

>piR-mmu-84680  
CUAUUUUAUUAUACAGGGACAAGAUGGG  
>piR-mmu-50181027  
UCUGAGGUUCAAGGGUUGCUAGGGGAAGU  
>piR-mmu-73120  
UGAGACGCUUUGACUGUGAAGACUAGGCCAU  
>piR-mmu-75708  
UGGGAGCUCGUGGACGAUGACAGCGCCAU  
>piR-mmu-73754  
UACAAGUGGAUGAUGAUAGAUUGGUGGGC  
>piR-mmu-874439  
UACUUUGUGGGACAGGAGGAGGGGGU  
>piR-mmu-73036  
AUGCAUUGUAGGAUGAUUGGCACUAUCCACC  
>piR-mmu-49763443  
UAAGAAAGUAGGCUAAGCAGGAUGGGGAAU  
>piR-mmu-73734  
CAGAACAGGAACUCAAACAGGGCGGUAACCU  
>piR-mmu-51649  
UAAGAAGGUGUCUAAGGAUGUAUGUGGUU  
>piR-mmu-75094  
UAAGAAAAGUAGUAGGCAGCAAAGGGCGC  
>piR-mmu-74449  
UGAAAAAAUUGUGGAAGAAAAGUAGAUGGU  
>piR-mmu-3520  
AGGCAUCUCUUGAUUUGUGACUGACGGUU  
>piR-mmu-73093  
UUGGAAAGAAAACUCAUGGAAUUAUGGCU  
>piR-mmu-258605  
UAGGAAGGGUAGAGCUGGGGAGGAGAGCA  
>piR-mmu-52045133  
UAAAAGCAAGGAGUGUGAGAUGGGGGAGGU  
>piR-mmu-34259  
UUGUUUCUGUAGAUGAAUCAGCUGAUGUUC  
>piR-mmu-81395  
UAACAGCAGUGGAAGUAGUCAGAAUCACC  
>piR-mmu-36441  
UAGCAGCAGUAGACUAAAGCUUUCUCCUGA  
>piR-mmu-76378  
UGCAGAUGAAGAACCGAACAGUAAAAGCAGA  
>piR-mmu-3061  
UGGAAAGGAUGAUCAGGCAGGCUUAGGGUGU  
>piR-mmu-22991  
UAGUUAAUGCUGUGGACUAAAGGGGUAUC

>piR-mmu-102216  
UGGAAGGGAACGCAAACGCAAAGACAAAGGG  
>piR-mmu-267637  
UCUGGACUAUGUCGAGUUAGGGUGGAAAGG  
>piR-mmu-168260  
UGGGACCCUGGCAGUGUAGAAAGACUCC  
>piR-mmu-76844  
UCCAAGGACAUCUGACAGGGAGUAGUAGA  
>piR-mmu-22066  
UAAGAACUACAUGAAUCUCUGAGGACUAUC  
>piR-mmu-92342  
UGACAGGACAAUAGACUUCACUUAGGGCGG  
>piR-mmu-49905  
UGUUGACUGAACCAAUGCAUUACUCUGAGGU  
>piR-mmu-29825  
UCUCAAAAAGGAGCCGAAGUUUGGACAAC  
>piR-mmu-96034  
UCAAGAACUGCUGAAGAAGGAUACCCAGAG  
>piR-mmu-31201  
UUAUUGUAGAUAAAAGGGACAGCAUACCAGAG  
>piR-mmu-90866  
UUGAUUCGGGUUAAGAACAUGGGAUGGGC  
>piR-mmu-6866  
UGGGCUGUCUUUCUGGUUUGACUGAUAGGC  
>piR-mmu-6868  
UGGGCUGUUUGGCAUUGAAGUGUAGAGCCU  
>piR-mmu-74110  
UAAGAACACAUAUCUGCACAAUCAUGAGAACC  
>piR-mmu-50755517  
UACUGCAUGAAUGAUGAAGUACAAGGGACAGU  
>piR-mmu-50061287  
UAGUACUGUGAUUUCUCUCCAAAGGCGU  
>piR-mmu-22485  
UAGAAACUUCUGCUGUGGAUGGCUGUCCU  
>piR-mmu-17095  
UAUAAAUGUCCAGUAGAGAGUUGGACCCUC  
>piR-mmu-62111  
UAGAAACCUGGGAACAGUCAUGAGGCAGAG  
>piR-mmu-73071  
UGUGAGUAGACAAGAACUCUGUGAGAGGCA  
>piR-mmu-49834752  
UAAAAGUCAAGUAGGACUAAUAAAUAAGAUGU  
>piR-mmu-10103  
UAGGACAGAAAUGAAAUUGCAGUGUUUGG

>piR-mmu-3423  
UAAAAAAGGUAGAAGGUGAGUUGGGUGAGU  
>piR-mmu-43896  
UGGAAAACGGAAAGGAACAGGUCAGAUGGG  
>piR-mmu-44798  
UAGGAGAGUGGAAUCUCAAAGAAGGCAAU  
>piR-mmu-73262  
UUUUACGUGCUGUGUAAAACUUGAGGGUAUA  
>piR-mmu-166433  
UGAGAAAGUGAGAGAAGUGGGAGGAAGGU  
>piR-mmu-9359  
UGUGAAAGUUGAGGCUGGGAAUAAGGUGU  
>piR-mmu-22034  
UCCUGCUGGAUAAAGGAUUACUCACGGUU  
>piR-mmu-98434  
UUACAAUAUCACAUAUUGCUUGGUUGGGGGU  
>piR-mmu-12424  
UGUGUGCUGCAGACAGGGAUGGGUAU  
>piR-mmu-100892  
UCAUGGGAUGGACAUGUAGAUUAAGGAAGA  
>piR-mmu-58378  
UAACUGAUGUAAAUGUAGAGUAGAAGCCGU  
>piR-mmu-22775  
UUCAAAGACUAUUGUAGACAUGAGGAUGGU  
>piR-mmu-50183756  
UCUUUACACAGAAGAAAUCUGUGGGACUGU  
>piR-mmu-41039  
UGACUUGUAGGAAGAUUUUUGAGGUCUGGC  
>piR-mmu-73172  
UUCUUGGUCGUGCCAUAUACUUGUAGAGGGC  
>piR-mmu-50659290  
UUCUUAGGGGAGGAGAACAGGCAAGAAAAGU  
>piR-mmu-50232920  
UACUGCCAGUGUCGGUCUUCAGAGGAAAGGU  
>piR-mmu-50739  
UAAGAAAUGCUGUGCAAUGAAUUCGGCCGU  
>piR-mmu-13838  
UCAUUUUACAAAUGAGGAACUAGGCUCAGG  
>piR-mmu-75083  
UGCAGAUAGGAAGAAGAGCUGGCACCCACU  
>piR-mmu-82527  
UAUGAAAUGUGGGUGUAUUGAAAGGGUU  
>piR-mmu-74021  
UGGACUGAAGAAGAAAAGGGAAUACUGGCUC



>piR-mmu-29304  
UCUGAGCCGAUGUUGAACCAGCUGAGGAUA  
>piR-mmu-6745  
UGGGAUUUAUAGGCAUAUACAACUCGUGGC  
>piR-mmu-73438  
UAAAAGGGAAUCUGUUGGUAACAAGGCAUA  
>piR-mmu-31247  
UAGUUGGAUGGUAUGCUCUAGAGACUGCA  
>piR-mmu-3192  
UGGAACUUGAAAGUUGAAUUCAGAAGCUGC  
>piR-mmu-74045  
UGUGGAACCGGAGAAGGGACAGCACCUGA  
>piR-mmu-73062  
UAAAAAUUGCCGGGCUGAAGAGAAGGGCUU  
>piR-mmu-75112  
UAGGAUGGAUGUGGAAAAGGGACUAGGUA  
>piR-mmu-106781  
UAGAAAGGAUAAGGGCAGUGUAAAGGGUU  
>piR-mmu-77700  
UAGUUGUGUAGAAAUGAAAUGGCUGGGGAU  
>piR-mmu-682511  
UAGUUGUGAGAUGGGAAAGUGGGGGAUGU  
>piR-mmu-154133  
UGAGUUUGACAGAUGAAUGGAAGUGGUUG  
>piR-mmu-75207  
UGCCCAAGUAUGUAGAGGUUACCUGAAGUC  
>piR-mmu-50486334  
UAAAGUUGUGAGCACCGAACAAAGAGGGCUGU  
>piR-mmu-86254  
UGGAAGUGGAUUGAUAGUAGAAGGGGUUU  
>piR-mmu-49112840  
UGAUAGAGUGGAGAGAGGAAGACAGAUAGU  
>piR-mmu-47040  
UAGGAUUUCUGGUAGACAGACAGGCAAGCU  
>piR-mmu-75159  
UUCAAAGAUGGUACUGUUUUAAGGAGGGGU  
>piR-mmu-76394  
UAGUUUAUGUGGUACUAGAGAGCAGCGGC  
>piR-mmu-50799  
UACGAAAAGAAGAUUUCUGUCUCCUUGGA  
>piR-mmu-76420  
UAUACUGUAAGAUGGAGUGGAAAGGAGGGG  
>piR-mmu-50356694  
UAGGAAGUCUGAAAUGAUGAGGUACAUAGU

>piR-mmu-56018  
AAAUGCUGAACUUAACUGCUAGAGGGUUU  
>piR-mmu-49801415  
UAGGUUCUGUGUGCCCACAGCAGUGGCUAU  
>piR-mmu-70102  
UGACAUGGAAGUUGUCAGGUUGUCAGGC  
>piR-mmu-1964806  
UCUUGAAUGGAGAAUGAGGCAGCAGUGGU  
>piR-mmu-76519  
UAGUAGGAUGUAACUUGGAGAGUGGAGAC  
>piR-mmu-73052  
UGUUUGAGUCAAAAAGAAUUCUAGCUGGCAUU  
>piR-mmu-80809  
UAAGUCAAGCCUGGACUGAGAGGCGUCA  
>piR-mmu-9543  
UGUGAGACUCGAGGCAAAAUUUGGCGGU  
>piR-mmu-4531  
UGGAAGUGUAGGAUACCCGUGCAGAAGGUC  
>piR-mmu-25003  
UAAAAGAGGAACCUCUGAACAGGUAUUCGGA  
>piR-mmu-4625  
UGGAAUGGGAUAGAUGGGAUGUCGGACGGG  
>piR-mmu-77397  
UCAAAGAACUUGAAGAUCUGAAGAGGUGG  
>piR-mmu-77860  
UAAGAGGCUUGGGCUAAGACAGAGGCAUC  
>piR-mmu-75493  
UAGUCUGAGAACCUUGGAGAUUAACAGCUG  
>piR-mmu-39257  
UUGGGCUUUUGUUGACUCUAGUGGACGA  
>piR-mmu-50112724  
GACAAAUGAAGGAUGGCAGUGGAGGAGU  
>piR-mmu-49821094  
UGUGCUGAGAACAGAGAAGAGGACCAUAAGU  
>piR-mmu-209746  
UCAUGGUUCUGUAAUGAGGGAUGGUGUUC  
>piR-mmu-73088  
UCGGAACUUGUAUCUUGUGAGACAGAAGG  
>piR-mmu-73047  
UGAUAGUUGAACUGACCGAAGCUAGGCAU  
>piR-mmu-88989  
UAGGACAAUGGAGUGAGGAGAAUGCGGGG  
>piR-mmu-52203  
UAGUCAAGUUGGCAACCAAGAAUUAGCACGG

>piR-mmu-13792  
UAGACUGUGAGCUCCUUGAGGACAGGGACAGU  
>piR-mmu-108414  
UAGUAGCUGAGAACUUGAACUUGGCCUUC  
>piR-mmu-18127  
UGACAUGAACACAGGUGCUCAGAUAGCUU  
>piR-mmu-137426  
UGAAUGUAUGUGGCAGGGGAUAGGACUGG  
>piR-mmu-49068820  
UUCAGGAGGGAAUUCUUUGAAGGAGGUGU  
>piR-mmu-219275  
UGUGAAUGAGGGAGCAGUAAGGACCCAGCU  
>piR-mmu-73163  
UCUGAACAGACUAAGAGCAUGACAAAAGCA  
>piR-mmu-14934  
UCAGAAUCCAGAAACUGAAUGGCUUAGAGAC  
>piR-mmu-20069  
UGGGAUCACGUCUUGUGAACAGCUGGAAGA  
>piR-mmu-75517  
UAGUAGAGCAUUGGUUAUGACGGGCGGG  
>piR-mmu-50371057  
UGAGAAUCUUUGUCUAAACCUGAGAAGCUGU  
>piR-mmu-122218  
UAAGCAUUACUUUGGGCUAGGGAGAUAGGU  
>piR-mmu-73846  
UAGACUGAGAGAUGACACCUAGAAGGGUGCA  
>piR-mmu-97313  
UAGUAGAGAAUGUUCUAGGCCAAGGCUGGC  
>piR-mmu-78874  
UCGUGACAGGGCUCUUGAAUAGAGGCUCAU  
>piR-mmu-21137  
UCUCAACAAAAGGAGUGGUUCUGGGGACA  
>piR-mmu-119402  
UAGCAAGACGGAUAGAGUAUGUGACUGGCAU  
>piR-mmu-75706  
UGAUAGGAAAUAGGAUGAAUGGAGGUUGG  
>piR-mmu-6402  
UGGGAGCCUGAGCAUCACUGAGAAGAUGGG  
>piR-mmu-88715  
UCUGACAAGAGAGCUGGCAUGCCUUCUGCCC  
>piR-mmu-73186  
UGGACAAGCUGACCUGAAAUCAUACUCACCC  
>piR-mmu-50270049  
UACAACAGAUUGAACUGUGGGAGGGGCUU

>piR-mmu-139741  
UUUCUUCUGAACCAUCCACACCCUGCUCUCCUGU  
>piR-mmu-73737  
UGUUGAACUCCUGCGUAAGCCACUGGGCAUC  
>piR-mmu-45329  
UAGAAGUUUCUCUGAACAUAGAGCACAGUA  
>piR-mmu-29671  
UAGGACAAUGAGCAGGGAAUGAGAUGGCC  
>piR-mmu-50324724  
UGAAGAAAAGGAUGCUUUGUAGAGGAGGU  
>piR-mmu-74128  
UCAACCUGUGUUCUACUGCAUCAGACAGACUU  
>piR-mmu-65238  
UCAAGGAUGUUGUGACAGGUGAAGUGGGU  
>piR-mmu-76283  
UAAAACUGGGGAAUUCUUGCAAAGUGGCA  
>piR-mmu-117309  
UGCACUUGGGUAGUCGGGAAAUAGGGGCAU  
>piR-mmu-76439  
UAUGAGUUGGAUGUAGAAACCCAGGCUAAGGC  
>piR-mmu-74136  
CAGAACUGUAGGGUAAGAAACUAGGAAGGCU  
>piR-mmu-50018748  
UAGAUGUGGAAGGAAAGAGAGAUGGGGAGU  
>piR-mmu-50303574  
UGCUGACUGUAGAGUGAGCAGUCCAUGUGU  
>piR-mmu-81418  
UCUGACUGGAGACCAGGUCUACAUCGGACC  
>piR-mmu-94179  
UAGGACUUAGUUGGGGUUCGGGGAUGGA  
>piR-mmu-17798  
UAAUAAAGUUCUCUCUGAACCAAACGUGCU  
>piR-mmu-73678  
UGUCCUUUCUUCUGACUGUGUGUAGGUGC  
>piR-mmu-73135  
CAAGCUGUUAGAAGGAAAUGUGUUCAUGU  
>piR-mmu-73054  
UAACCAAGACGGACUUCACGAUAGUGGCU  
>piR-mmu-49652150  
UUAGAAAAGGAAUAAAGAGGUUUGGGGCAU  
>piR-mmu-73106  
UGUAUAUUCUGAAGACAGAGUUGGUAGAACC  
>piR-mmu-32258  
UAAGGAAAUCUGAGUCCAAGAGGGACAAGUC

>piR-mmu-75195  
UGAACAGGGAAGAUAGGACAUUUGACACAGG  
>piR-mmu-63773  
UAGGUUGGAAGAGUACAGUGGACAACGGG  
>piR-mmu-92297  
UCAGAAGAAGUGGGAGCUGCAUAGAAGC  
>piR-mmu-76365  
UUGAACUAGAUUGUUGGAUCAGCAGCGGC  
>piR-mmu-74035  
UAAAGGAAGUUUGCUUUUUGAUCGUUUUA  
>piR-mmu-114566  
UGAACUAAAAGUUAGGAGCUGGCAGGGGGA  
>piR-mmu-82791  
UGGGCAGGCUCUUUCUUGCUUUGGACGGU  
>piR-mmu-127091  
UGAAAACUGGACUUUAGAAGAAAUUGGUUUG  
>piR-mmu-647878  
UCCAAGAUCAGGGGAGGCUUCAGGUGGGG  
>piR-mmu-48829021  
UGAAACUUUGGAAUUGUGGAGGGCAAAAUGU  
>piR-mmu-73076  
UGUGAUAAAUGCUCUGACCAGAAACACCUU  
>piR-mmu-82893  
UGCCUUGGGCUGAACUGAAUGCAAAGGGGG  
>piR-mmu-97374  
UCCACAGGAGACAGUGCGAACUUGAAU  
>piR-mmu-85329  
UGGUAAACACUCUGAACUCUGUGGGACAC  
>piR-mmu-248914  
UAAACACCCCUAGGAGCCUCUGCAGUGCCA  
>piR-mmu-136943  
UCCUGAGCGUUCACGGAGGCAAUUCAACA  
>piR-mmu-73057  
UGUUAGAACUGGCAGAAAGUAGUCUCAAAAC  
>piR-mmu-126088  
UACAAGUAGGGGAUUUUGAAGUGGGGGAUU  
>piR-mmu-73442  
UGACAGAAACUGCUGACCUAGAACCGGAGA  
>piR-mmu-75427  
UGGAAGCUGUAAUCUCUCAGAGAAGGUGA  
>piR-mmu-81328  
UCUGACCAUGCUGUUUGGCCACACUCUGC  
>piR-mmu-264247  
UCAGAAUAUCAGAGGGCUGGAGAGAUGGG

>piR-mmu-48770640  
UAGCUCAGUGAUGGACUAUGAUGAGGGUGU  
>piR-mmu-90885  
UUUCCUUGGAAUUCUGGCAUAGAAGUAGACGU  
>piR-mmu-1342663  
UUCUCGUGGGAUCUGGGUAGGGGUU  
>piR-mmu-79365  
UAGAUCUCUUGAGAUGUUUGCAAGCUGACU  
>piR-mmu-547983  
UGGCUUUGAACUCAGCUUGGAUGGCCAG  
>piR-mmu-80713  
UUCUGUUCACGAACAGGAGUAUGGAUUAGG  
>piR-mmu-77333  
UAGUAGAUACUCAUGGGAGAGCAAGGCAGU  
>piR-mmu-102000  
UCGGGAUUUUGAGAAUCAAAAGAUGGGACCUU  
>piR-mmu-85141  
UUCAGAAAAGACCUAGGAACUGAAGGUGGA  
>piR-mmu-496  
UGCAGCAGGGCUGGGACUAGGAUGGA  
>piR-mmu-83816  
UAGACACUUGAGGGUUGAGGAGAGACUGA  
>piR-mmu-106003  
UGUUAAGGAUGCAGGGACCAAACAGGAGGG  
>piR-mmu-47978  
AAGGAAGACACUCUGAGUCUAUGGCAGUGC  
>piR-mmu-73069  
UGAGUAGAACAAAUGGGGGCAAACCCUAGC  
>piR-mmu-73178  
UAGAGACUGACAAAUACUGCAGAAAGCCUGU  
>piR-mmu-108624  
UCUUUAAGUGGACCAGGAGCAGAGGGAGC  
>piR-mmu-8505  
UGUAAA AUGGAGAUGAUAGCACACAUUUGG  
>piR-mmu-30783  
UCAGAUACAGAUUAAGAACUUCAUACUUGC  
>piR-mmu-112615  
UGGAAGGUAAAAGGUAGAUGGAGUCAGCAC  
>piR-mmu-93843  
UGGAAGGUUGAAAUGGAAAGAAGAGACAGA  
>piR-mmu-86787  
UAGAAACUCUGCUUAAGAGAAGAAUAUGACA  
>piR-mmu-50933064  
UGGGAAGGGUAGAGACUGGCCACAUGAGU

>piR-mmu-84905  
UAUUUAGAGGAUGGAGUGGUAACCACGGU  
>piR-mmu-14327  
UCAAUAAAUGUUUGUUGGGUAAAGGGGUC  
>piR-mmu-73802  
UAGUAGAAGACAAGAACUCUGCCAGAGGGU  
>piR-mmu-22484  
UCAAUAAAUAGGGAGUGAUGGUUAUAGAAC  
>piR-mmu-73907  
UUUUAGAAUGUAGAGAAACUAAGAUGGUGG  
>piR-mmu-75475  
UCUGAAUGGAUGGAAAACGGAAAGGAACA  
>piR-mmu-81092  
UAAAUGGUGAACUUUGUGGAGAUGGGGAUG  
>piR-mmu-73169  
UUCUAACUCUGCUGUGAGUGAACUUGGCUU  
>piR-mmu-73204  
UGAAAAAGGACCCAAGUACAGAAACAGCUC  
>piR-mmu-77180  
UCCAUGGACGCAGAAACCUACAGCAUGAU  
>piR-mmu-74381  
UGACACAAAUGGCAGAGCACAGGAACACUU  
>piR-mmu-79614  
UAGAGUGUAUGAUGACGGAGGCUUUAUCU  
>piR-mmu-49019142  
UUGCUGUAGAGGAUAAAGGCAUGUUCAAGU  
>piR-mmu-94836  
UCUGUAUGUUAUAGGACAAUGAGCAGGGA  
>piR-mmu-76947  
UGGGCUGGAACAGAUAGAAAGGGAGAAGAU  
>piR-mmu-76309  
UAGAGAACUCCGUUCUGUAGCUGCCGCAUG  
>piR-mmu-50912235  
UUGUUGACUGGGGUUUCUUUGUAGGAUGGU  
>piR-mmu-17414  
UGACAGAACGAUCAAGACAGAGAUGGAGGG  
>piR-mmu-50352  
UGUGUAGAAUAGCUCAGGUUUUGGAUAGGU  
>piR-mmu-50607258  
UGCAGAUUUGUUUGUCCAGGAGAGAGGGUU  
>piR-mmu-84536  
UAAGUGUAGGACUCUCAGAGGCACACUUUUU  
>piR-mmu-49471  
UAAGCAGAUUGUGUAUGUAUGCAGAAGUGU

>piR-mmu-83936  
UAAGAGGAGACUAAUGACCUGCCAGAAGGG  
>piR-mmu-77865  
UAGGCUAAGUGACAACAAGUGGAGAAAGGG  
>piR-mmu-29215  
UACAUUCACAAUAUGUUAGAACUGGCAGAA  
>piR-mmu-143046  
UAGAUAUUGGUAGAGGUAAUUUCAGG  
>piR-mmu-74530  
UCUUUUUCUUGCUUUGGACGGUUUCCUCUUC  
>piR-mmu-208672  
UAUGUGGCAGAGGUAGGUAGAGGAUGG  
>piR-mmu-74367  
UAGGAACUGUCUGUAUAUGGGAGACAAUG  
>piR-mmu-78710  
UAUCUCAAGGAAUGAUAGGAACGUGGGGU  
>piR-mmu-4297  
UAACAAAUCGGGAAGGUGACAGAGUCGG  
>piR-mmu-81723  
UUGAUGUUGGACAAAGACCAGUUGGUGGAUG  
>piR-mmu-73042  
UAGUAGAAUCAAAACAGCAAGAGAACCUUAGG  
>piR-mmu-85694  
UGGCAUCUGUUUGAUGUUUGUGAGUUGGG  
>piR-mmu-15401  
UAAUACACUGAGCAGUGGACUCCGUGAUU  
>piR-mmu-66730  
UCCCAGGGCUAUAUCUACUGAACACGGCUU  
>piR-mmu-44673  
UUCAGGACGUUCUGCCAGAAUGACAACAGU  
>piR-mmu-49281  
UGUUUUCAUAUAGACUGGCAUGGUACCUU  
>piR-mmu-654474  
UUGGAAGGAAUAUAAGGGUCAGAAAUGGG  
>piR-mmu-73555  
UGGAUUGAUUACUGUGGGGAUGGUGCUGU  
>piR-mmu-14388  
UGGGAACUCUGUGUGGAAGUAGGUGGUA  
>piR-mmu-73793  
UACAGUUUUGGAUCACUGAGCUAGGCAGAGU  
>piR-mmu-110814  
UGUAGGGCUCUAAUGUAGACUGGUCACAGC  
>piR-mmu-74007  
GAGAUGGACGGAACCUACCUUCAUUGGCGGG



>piR-mmu-515639  
UGAGAUGGGAAAAGGAGGUAGCGUUAGGU  
>piR-mmu-471895  
UAUGUCUCUGUGAACAGUGUGAUUGUCAUG  
>piR-mmu-214774  
UGCAAAGGGUCUGUAGGGACUUAGCUGAGG  
>piR-mmu-71227  
UGAGGUUUUGCAACAAGUAGGAUUGAAAUGGU  
>piR-mmu-152897  
UCCCCUUUUUGGCAGGGUAGAGGACUGG  
>piR-mmu-73635  
UAAACUGUUGGGUCGCCGUCGUCGGUCGUU  
>piR-mmu-73227  
UAAAAGAACCUGAAAAACAAGUCUUUAUUC  
>piR-mmu-48979  
UUCUCUAACGAAAGAGGACUGUCGGGUUC  
>piR-mmu-75548  
UGGUGGAAUUGUACAAAGUAUUUGAUAGGU  
>piR-mmu-6121  
UGGGAACCUGAGAGGAUGGAAAUCUGGA  
>piR-mmu-10971  
UAAGAUGAGUGGGAAAUUCAUGCAGUGU  
>piR-mmu-103411  
UGGGGAACAACAUUGGAUGAGCUGAAGGA  
>piR-mmu-31129  
UGAACUCAGAAGAUAAAGUGCCCUUCAGGA  
>piR-mmu-14678  
UCCAUGUGUUGGGAUUGUCUGGUCUUGUU  
>piR-mmu-75066  
UAUAGAUCAUACUGGAAAAGGAAGCAGGCU  
>piR-mmu-1797128  
UCCAAGCCUCUUCUUGGCUGUCGUCGUC  
>piR-mmu-73374  
UGACACAGGACAAGAAAUGAGCACUUGGC  
>piR-mmu-131396  
UCAGACAGGAAUGUUAAGGAUGCAGGGAC  
>piR-mmu-88429  
UGACAGCAAGGACACGAAGGGAUAAGGCC  
>piR-mmu-27112  
GAGGCUGUGAUGAAGGUUGAUAAAGUGCUU  
>piR-mmu-33292  
UGACUGAGCACUAGAUCCAUCCACGCAGGU  
>piR-mmu-49016694  
UCUCUGGAUAUGAGUGAGCAGCCGGGCAGU

>piR-mmu-76987  
UGUAAA AUGGGGAUAGUAUUGGGUAAAGCA  
>piR-mmu-73825  
UUUGGAUACUGAGUGCUUUCGGAGAUGCAU  
>piR-mmu-49394  
UAGCAUGGAUGGUGAGCUAGGAAAGCUAC  
>piR-mmu-649804  
UGAGUGAGGAGAGAGAUGGGAACAGGC  
>piR-mmu-138477  
UGGGAGUGAGGCAUUAGGAAUAAGUAGUU  
>piR-mmu-73249  
UCUGUUAGCAGAUACUGGAGAGAACCAUUC  
>piR-mmu-74852  
UUGAGAACCAGAAACUACGUGCUGAUCAGU  
>piR-mmu-267467  
UCUGAUGGAGAGGAAGUUUGCACCCCGAG  
>piR-mmu-20652  
UAGAACAUGACCUAGCUGAGGAUGACCC  
>piR-mmu-21697  
UCUCAGUGCUGGAGACUUGACAUGGUACC  
>piR-mmu-79223  
UGACACUUCUGAGAAGACAGGGUUCAGCCCC  
>piR-mmu-38815  
CAGAAAGACGCACAGGGACCCUUGGAGGA  
>piR-mmu-74480  
CCCUCUCUGAAAAGUUGGUAGGCUGGAAGU  
>piR-mmu-86768  
UAAGAAAGCAGGUGCAAGGGAAUGGACAU  
>piR-mmu-112691  
UGGGAAGAUGAGAGGAAGGACGGGCAAGC  
>piR-mmu-151158  
UACAUAAAGUGGACAUGGACACCACAGUG  
>piR-mmu-50884576  
UGGAAGACAUGUCUGCAGAGCUGAGUGAGGU  
>piR-mmu-83446  
UAUAAAUGGAAGGUGUGACCCAGAAGUCAGG  
>piR-mmu-16374  
UAGUCUGGAAUAGACCUGGGAGAAUGGUAGC  
>piR-mmu-80540  
UAAAAGAAAAAACAAGGCAGGGGAACA  
>piR-mmu-79469  
UAGGAAUAGGCAAGCAUGUGAGAUUAUGUG  
>piR-mmu-22730  
UGAGAAAAGAUGAAGCAAACGUAGUGGAAC

>piR-mmu-82388  
UUUGGGAUAGAUGAACUCAUGAUGGUGGAA  
>piR-mmu-53438  
UAUAGAAAUUGAGACAGGACAGGUUCGGU  
>piR-mmu-33565  
UCCUUGAACAAAGAGAACAGAUGGCUUCCCAC  
>piR-mmu-80614  
UAGGUCAGGAACUAUGGACAUGAUCAGGG  
>piR-mmu-75463  
UAGAAAUGAUGGGACGUGUUUGAGGUAU  
>piR-mmu-1187707  
UCCUGGCUGAAGAACUUGGAAGCCUGAUGG  
>piR-mmu-73679  
UUGGUUAAAGAUUAGACUGUUUAGCGGUG  
>piR-mmu-5083559  
UGUGAAAAGAAGAGAGAUGACUGUUGGUGU  
>piR-mmu-4668  
UGGAAUUUAGUGUCAGUCUGACUGGAUGGA  
>piR-mmu-13956  
UGGGAUUAAAAACAUGAACCAUGGAUGG  
>piR-mmu-48904071  
UGUGAAGAGAGAUUGUACAAGAGCAGGGGU  
>piR-mmu-73561  
UGGCAGGAAUCCUGAUGAACAAAGUUUGACUC  
>piR-mmu-144484  
UGAACUUUGUGGAGAUGGGGAUGGACCGC  
>piR-mmu-209960  
UCCAGGAUGAGAUUGAAGCAGGGUGUGUGU  
>piR-mmu-458116  
UAGGAUGAGUUGGCUUGGGUUGUGUGUGU  
>piR-mmu-73584  
AUUAUUCAUGACUGGGGAUGUUCUAAGAC  
>piR-mmu-101972  
UCACCAGGCUGGAAUUGAAGAUGUUCAU  
>piR-mmu-180320  
UAGGAAGAAUGUUCUGGGUGGAGGGGGGA  
>piR-mmu-73916  
UACAUGAACCCUGAACAGAGGCACUCAA  
>piR-mmu-73720  
UCUGCAUUUUGAUCAGUUGGCUUUACAU  
>piR-mmu-81690  
UGAAUCUUGAAACUUUGGAAUUGUGGAGGGC  
>piR-mmu-76885  
UGCUCUUACAGUGACUGAAAACUGCAAC

>piR-mmu-81258  
UCCUUUCAUAGUUUAUGAAAUAGUCAUCGG  
>piR-mmu-127562  
UGCAGUUUUGAAGGUGGUUUUUGCUAGAU  
>piR-mmu-480392  
UCAGUGGACUGAUUCUUCUCUAGUAGCUGGC  
>piR-mmu-74002  
AUCUGUGAAAUGGAGCCAGCUACGUCCUCU  
>piR-mmu-73103  
UUAGAGCUACUACCAAGACUGUUUGAGAAUC  
>piR-mmu-50297399  
UGCAGCUGUAGGGCUAUAGCUUAGCAUGGU  
>piR-mmu-75940  
UAAUAAGGGAUUGUAGCUCCCCAAGGUU  
>piR-mmu-73210  
UAGAGCUAAAGUAGAACAGACCAUGAGUGGC  
>piR-mmu-74935  
UGAAAGGAAGUAGGCUGACUGUUUUCAGG  
>piR-mmu-270065  
UGAAGAGUCUCUACAUGGAACAUGGCA  
>piR-mmu-73500  
UGUGAAGAGACGUUAACAGUGCAAUACAA  
>piR-mmu-567398  
UGUGGCUUUGUAGAGCUAAAACCCACACAGGC  
>piR-mmu-13879  
UGCAACUUUGACAAGAUCUACAGCCUGACUC  
>piR-mmu-49464676  
UCUUCUUGCUUGGGCUAGUUUUAGAGGCAU  
>piR-mmu-74949  
UAAUCUAGAGUGGGACAUUGCCAGUGCAU  
>piR-mmu-73037  
UUCUCUUACUGUAAGAUCUGUAUAAGAAGA  
>piR-mmu-68560  
UCUGUCCCAGGUGUGACACUGCCGUCGGU  
>piR-mmu-86461  
UGGGCUCUGGAUAGUCAACAAAGGGAGAGA  
>piR-mmu-49893418  
UAAUAUGGAUGAAUGUAUGUGGCAGGGGU  
>piR-mmu-50046473  
UAUAAGACUCUGGCGAGCCUAGAUUAUCGGU  
>piR-mmu-48439  
UCUUUGGUCUCUUAAGGUAGAACAUGGCUC  
>piR-mmu-127371  
UGAGAGUAAUGAGGUCGAAAGAAGGGG

>piR-mmu-80520  
UUAAAUGUUUGUAGGAUGCAGCUGGGAUGG  
>piR-mmu-79484  
UGACUGGAAAAAGAAGAUGAAGAAGAGGA  
>piR-mmu-86049  
UGACUGGAAAGAGGCUCAAACCAUGGGAGA  
>piR-mmu-215312  
UGCCAGGGAGACUGUAGUCCUUGAGCAGGGA  
>piR-mmu-98906  
UAGACUGGUCACAGCAGCUGACACAAAGGUU  
>piR-mmu-5181133  
UGCUGGUGUGUGGGGCAUAUGUGGCA  
>piR-mmu-2536846  
UCUUGGCUGUUGAGCCAAAUGAAGGCGUGGG  
>piR-mmu-1227022  
UGGGUGAGCGGGAGAAGCAAGGAGCAGC  
>piR-mmu-123199  
UCUUGGAGCUUGUGAACUUGGCAAAGUAGG  
>piR-mmu-16576  
UAGACUGGGCUGUCUCUGUCUGCAGAAACACU  
>piR-mmu-73171  
UAAUCAACUCGUGAACAGUGGCAUUUGUG  
>piR-mmu-42003  
UGAGAAAGUUGAGCAGUCCAGAGAUGUC  
>piR-mmu-73078  
UGAUUUCUUUCAUUGUAGGUCUUGGACUGU  
>piR-mmu-267404  
UCUGAGGCAGAGACUCUGUCGGCCCAUGC  
>piR-mmu-37740  
UGAACACGGAUACUCAGACACAUACCCUGGC  
>piR-mmu-136273  
UAGAUGGGAAAGAGAAGGGAAAUAAGCGUG  
>piR-mmu-80703  
UGGGAGCUCGAUUAAGUGAAAGUCAGGGAU  
>piR-mmu-142040  
UAAAUGGUAGGAAUAUGAGGGCAGAGUUGG  
>piR-mmu-109324  
UUUAUGGGUUUUUAGGGUAGCAGAGUUGGU  
>piR-mmu-45250  
UAGGACUUCGCAAUGGUUGCAAACUUGGG  
>piR-mmu-82267  
UGGACUUAGAUCAGCUCUGCACAGUAGCUGC  
>piR-mmu-100201  
UGUGAGCUGUCUGACAUGAGUGCAUGGA

>piR-mmu-84685  
GCUUGAGUUGAGACUGUCAGUAGGUGUU  
>piR-mmu-144056  
UCUAAGAACCUGGAAGGGCCGUGGGGAC  
>piR-mmu-76585  
UCAAUUCUUGUGGAACCCUCUAGACAGGUAU  
>piR-mmu-593970  
UUCUUGUGGCUAUCUGUAGAAGGCACAGAGU  
>piR-mmu-285247  
UGUGUCUUCUGUAGGCCUUCUAGAAGGGC  
>piR-mmu-73039  
CUUGCUCUUGAAGAAGACUGGGACCAUCAUCU  
>piR-mmu-50709768  
UGAGAUGUAGUGGAGCUGGUGUCAGAAGGU  
>piR-mmu-65521  
UCACAGGAUGUUCUCUGGAUGGUAGAGGC  
>piR-mmu-90138  
UUUUGGCUUAUGGUUGUAGAGGGUUAGAGU  
>piR-mmu-50153239  
UCAGAGCACUGUUGGAAGUAUGGGAGAGGU  
>piR-mmu-63410  
UAGGAUGUAGACGGUUCUGGUUUUUGCUGU  
>piR-mmu-74390  
UGCUGACUGAUUAUAGUGUGACACGUGUU  
>piR-mmu-73617  
UGAAAACAGUGUGGAUGGCAAACUUUGG  
>piR-mmu-94248  
UCUCAGACUAAGAAGAAAGGCAAGCACGGA  
>piR-mmu-83427  
UAACAGAAAACACAACUGAGAAGGGCUAG  
>piR-mmu-29057  
UACAGAAAUGAACUUUCAAAAGAAGCA  
>piR-mmu-74571  
UAGGCAGUGUGAAGAAAGGAACCGUCCGGC  
>piR-mmu-48507  
UGGCUAAAGUGAAUAUAUGACAGAUAGGC  
>piR-mmu-58585  
UAGGAAUUCUGUGAACAAAUCACUGGAGGC  
>piR-mmu-121028  
UUGUAGGCUCUAAACACCUCAAGUGGCAGGC  
>piR-mmu-50922024  
UCUGAAGAGACCACAGUGACAGAAGGACAGU  
>piR-mmu-50710641  
UAAGACUGAAGCGAAUAGGGACAAGGCUGU

>piR-mmu-110258  
UCAGAGAAUGGAAUGGGCGUACUUGGUGU  
>piR-mmu-94434  
UGUUGAAUGGAUGAAUGGGUGGAUGACAC  
>piR-mmu-74356  
UUUGAAUAGAGAAACAAUGGACCAGGAGA  
>piR-mmu-103403  
UGGGAUUCGGAACCGGGGAAGCUGCUAGGC  
>piR-mmu-15360  
UAGACUUGAGAAUAUUUGGGACAAGCAGGU  
>piR-mmu-103639  
UUUGUCUUAUUGGAUUUUGUUUGUUUGGU  
>piR-mmu-108839  
UGCAGUUUCUGAGGGCAUGAGAAGCUCCCU  
>piR-mmu-102330  
UGUUUAAUGGGUUGGAAUGAGGCUGCUUUU  
>piR-mmu-51460  
UUGAGUCUAGAUGAGUGGAAAGGUGCUGU  
>piR-mmu-35772  
UACAAAACACAUUGUAGUCAGGACACGGAU  
>piR-mmu-73260  
UUUGUUUUCGGACUAGUUUGAAGACCAUG  
>piR-mmu-75012  
UUUGACAGAUGGCUGAGAUCAGAGAAGGU  
>piR-mmu-49800739  
UACUUCUCUGAGCAAUGAGAGCAACAGCGU  
>piR-mmu-84271  
UCCAGUUAGAGAUUGGUCAGAAAUGGCA  
>piR-mmu-74277  
UUUGAACAUUGCAGUUCAUAGAUACUCACCCU  
>piR-mmu-50546  
UAGUUUGAAAUGAACUAAGAUGGGGGACA  
>piR-mmu-110689  
UGGACUUAAAAUACGAGGAGGUGGGGGGUU  
>piR-mmu-77918  
UUUAAGUUGGCUGUAAUAUCACCAGAGGA  
>piR-mmu-1675985  
UGCAGAGGAGGGAAUGGCUCAGUGA  
>piR-mmu-77257  
UGAGAAAACUGUGAGAUGGAGAGACACAA  
>piR-mmu-74690  
UAAGAGAAAAGCUUGACUCUGCAGAGGAA  
>piR-mmu-85825  
UCCUUUGGACUGAGGAAGAAGGAGAAGGU

>piR-mmu-84894  
UAGUCUCUGACCUCUGACUAGUAGUACGUU  
>piR-mmu-102993  
UAGCAGUCACUUGAGGCUCUACAAAUCGGCGU  
>piR-mmu-63810  
UAGGUUUUAGUGGACAGCAUUUGGCAGA  
>piR-mmu-73124  
UACUGUAGUUUGCUUCAGCCUAGACAGCAC  
>piR-mmu-18060  
UAAGUAGUUUAGUGUCUGAAUGGAUGGA  
>piR-mmu-73783  
UUAGAGCUGAAUAGAAUAGGUAACAAAUGU  
>piR-mmu-78531  
UAUGUUAAGCAAUGGAGAAGGGAUGGAUGA  
>piR-mmu-74559  
UAAAGAUGGAACCUGACCAAAGACAGGGCAC  
>piR-mmu-94324  
UGAUAGUAGAAGGGGUUUGAUUGGGGAC  
>piR-mmu-73250  
UGAGACAAAUGGAUAGCUGGCAUGAAGUU  
>piR-mmu-163414  
UAGAUGAGAUAGUGGUAGGCAGGGCAGGUU  
>piR-mmu-96127  
UGAUCAUAAGGAGAGAGUUGGCAGAAAGGG  
>piR-mmu-19000  
UGAAAGAAUGAACUGCCAGACUGACUGCCC  
>piR-mmu-198257  
CUGAAGUCUGAGUUGAACCCUGGCGGCUGUGU  
>piR-mmu-81439  
UGCAUUGUUUUUAGCUUGAUUGUGGGUG  
>piR-mmu-49429347  
UUUCAAGAUGUGAUUUGACAUGGGGGCAU  
>piR-mmu-89956  
UAUUUAUUGAACAUAGAAGAUUGUGGGGGC  
>piR-mmu-100938  
UCUGCUGUAGACAGCAAGCGUCUCUAGCUG  
>piR-mmu-73727  
UUCUGGCUUGCACUGAUUUCUUCACAGAU  
>piR-mmu-75577  
UGACUGUUUUUCUUGUACAAGGCAACCCCAAC  
>piR-mmu-17066  
UCUGUCAUUUCAGAAUGUUUUGCUCAUGCA  
>piR-mmu-50015  
CAUGAUUGUAGAUCGUGAUGCACAGUGCAGU



>piR-mmu-543441  
UGGAGCCUGUGGGCCCUGCCUUGUGAGCGGU  
>piR-mmu-73951  
UUCUUGGGACUAAUAUUGAUGGCUUUUAUU  
>piR-mmu-73716  
UGACUAGAUAGGAUUUAAGGAUGGCUCCCG  
>piR-mmu-94314  
UGAGACUCUGUACUGCUGAGCUUGGAGGG  
>piR-mmu-123043  
UCCAGAUGUAGGACUGUUUGUGUGGGUUU  
>piR-mmu-22159  
UAGGACAAAUGAAGAUGCCAGAAGGCUC  
>piR-mmu-75489  
UGGUAACUCUGUUGGAUGAGGCUGGCACC  
>piR-mmu-14883  
UGACAACACAGAACAUGCUAGAGGCCAAGA  
>piR-mmu-74036  
UGGGAACUAUAUUCAGGGAAUUGACAGCA  
>piR-mmu-6189  
UGGGAAGGAUGAUAGCAGAUUGGGCAGA  
>piR-mmu-49898472  
UGUAAAGGAAAGAGAGGCAAGCUGGAGGGU  
>piR-mmu-77642  
UAAACUUUGAUCCAAAUCAGGCUUAGGGCC  
>piR-mmu-79547  
UUAACUUUGAUCAGUAAGUUGGAAGCUGG  
>piR-mmu-910732  
UCCAGCUUUGAUGUGCUGUGCGGGUGGUGU  
>piR-mmu-84826  
UUUUUAUGCAAGGAUCUUGGACACGCAAG  
>piR-mmu-19475  
UCUGCAACUAGAUGGACUUGCUUGGAUGU  
>piR-mmu-14513  
UAGGACAGUAUGUUGAACUCAGCAGAAUCC  
>piR-mmu-70052  
UGACAGUUCUGACAUUGCAGGUACCUCAUC  
>piR-mmu-74516  
UGUAUUUCUGGACAGAAUGACAGCUGUGGAU  
>piR-mmu-75645  
UAUUCAGACUUAGAGGUAGAAAUGAAGGGC  
>piR-mmu-54124  
UGAGAUUUCUAGUUCUCGUACACCUGGCAGA  
>piR-mmu-81404  
UAGAGUUCUCUGGACUUUUUGAAUACUGGU

>piR-mmu-26363  
UCCAGAAAACUUGGAGAUGUGCACUCAGA  
>piR-mmu-55877  
UAACUGUGGGAAGAUGUCUACAUCCCAGGA  
>piR-mmu-73187  
UGAAAAAGGAAUGUGUUCUCGCUGUGGCAU  
>piR-mmu-267082  
UCUCUGGACAGACAGACAGAACAGCUGAUAUC  
>piR-mmu-74921  
UAGUAGUUCUUGGACUCUGAUGGAUGGA  
>piR-mmu-24021  
UACAGACACGGCAGUUUAGAUAGGGUUUGU  
>piR-mmu-322066  
ACCUUUUAUAGAGACAGGGAGUGGGACA  
>piR-mmu-106245  
UUUUUUUUUGGUACUUAGAGGGGAAUGAUGU  
>piR-mmu-109374  
UUUUUUUUUGUCUCAAGUUGAAUGUACCGGC  
>piR-mmu-73309  
UCGGACAGUGAACAGUGUUGUAUAAGCAGA  
>piR-mmu-40085  
UAGACUGUAUGAUUAUAGGCUUGAUGUCCUU  
>piR-mmu-12536  
UGACUGGAAAUCUGUCGAAACACACGAAGG  
>piR-mmu-161551  
UAAAAGGGAAGUGAAGAAGGGAGACUAGU  
>piR-mmu-113112  
UUGGUCUGUGCCUUUUGGACAAGAACUACGUC  
>piR-mmu-903276  
UCAAAAGGGAAGAGAAUACAGGGAGGAGG  
>piR-mmu-152225  
UAUACAAAUCUAGGGGGUAGAAAAGGUG  
>piR-mmu-101225  
UGUAACUGUCAUGGUGGAGAGGGAGGGGGU  
>piR-mmu-74301  
UACUUGUAGAGAAAGCUGGAGUUGAGCGG  
>piR-mmu-73899  
UGUGUGAAUCUUGCUGUGUGUACUUACAAC  
>piR-mmu-77140  
UGUGAACUCUACAGUCAGCACUGCUUCCAA  
>piR-mmu-24445  
UACUUGUAUUUAUGCUGAGCCAUGGUGGCC  
>piR-mmu-81449  
UGUGAACUCUGCUUCAAGAACAGGAUGAUG

>piR-mmu-73206  
UUAAAAGACGAGUGAGAACUAACAAGGAGA  
>piR-mmu-73928  
UACAAGCAGUAGUUUGGAUUUAUUCUUGGU  
>piR-mmu-73537  
UUAUGGUCGAUUUGAUGUUUAGGAAUGGUA  
>piR-mmu-76520  
UCCCAAAGACUUACUGAAACAGAGAUGUGC  
>piR-mmu-50478  
UAAAACAAGUACUUCUAAGUACUAGACAGCA  
>piR-mmu-68744  
UCUUGUUUAAAACCAAGAUCGAAGGCCAGC  
>piR-mmu-107343  
UGGGACUCAGGCAUUUGGCAUGAGACACUC  
>piR-mmu-266326  
UCGUCAUCUCAAGACUGAGAAGCAAGGCUA  
>piR-mmu-105890  
UGGACUCCUGAAGACUGACAGUAAAGGCAUG  
>piR-mmu-50373  
UAUGAACCUAGCAGAAGUGAUAAUAUGCACUC  
>piR-mmu-81440  
UGCGUAGUUUUGAAUUCUUGGGGGACGGA  
>piR-mmu-50871130  
UGUGACUAACGAGCCACCAGCAGGGAGAACU  
>piR-mmu-79096  
UGGGAUGGCAGAGUAAGAUGUUUGACAGUU  
>piR-mmu-74611  
UUUGUCUUUACUAUAAGAUGGCUGUCACCC  
>piR-mmu-38315  
UACAUCUGAGAAUUCUGUGUUGGUUGAUGU  
>piR-mmu-79059  
UUGGAGGACUGGACUACAAUUGGGAGGA  
>piR-mmu-34079  
UGCAAGGUCAAUGUAGAACUGGCCUGGC  
>piR-mmu-116199  
UAAAUGGCUGGGAUUGGGUAUAAGGAGC  
>piR-mmu-63216  
UAGGAAUAUGAGGGCAGAGUUUGGUAGUGG  
>piR-mmu-14241  
UCACAACAACUGUGUGGAGGUUAUAGGUGU  
>piR-mmu-76933  
UUGAAACCUGAGACUCCAGAAGAUGCCACC  
>piR-mmu-110272  
UCCAGAAAUAAGAGCGUUUGAACAGACCAGG

>piR-mmu-77266  
UUUGAAACUGUUGGUAUGUAUUGGAAGGG  
>piR-mmu-74288  
UUGAU AUGUAGGAUCCCUCUCAGAUGUCA  
>piR-mmu-31292  
UAGACAU AAGGAUAGGUGAUACAGUGUUGG  
>piR-mmu-49198224  
UAAAUGUGGGCUCUCAAAUGAGAAAAGAUGU  
>piR-mmu-49721637  
UAAGGAUGUAUGUGGUUCAGUAGUAGAAGU  
>piR-mmu-161500  
UAAAACAAGGGCGGUUGUGAGAAAGGGAA  
>piR-mmu-74168  
UGCUGACUGUAUGACCUAAGGCAAGUUUCU  
>piR-mmu-127800  
UGGAGAUUUGACUUAUGUGAGCCGGGGGA  
>piR-mmu-56056  
UAAACAACACUGCUGUAUGAGACAGGCGA  
>piR-mmu-213930  
UGAGGCCUGUUUAGCUGACUCUGUGGGCUG  
>piR-mmu-616014  
UUUUUGGAGUUGUGGUCUUGUGGAGGCAU  
>piR-mmu-1636837  
UCUUGUUUUUGUUGGAUGAGGAGGGUGA  
>piR-mmu-89308  
UGAAACAGUUUGGAAGUAGGUAGCAGA  
>piR-mmu-9338  
UGUCUUUACUUUGGUCUGAUCAGCUUGGC  
>piR-mmu-452739  
UAGAUGGAAGUCUGAUGGUGGUGGUGGC  
>piR-mmu-73228  
UAGUUGUUCUGUUGUACAAGUUUGGAAGCA  
>piR-mmu-34313  
UGUGAAAAUAUGCACUCUGUGGAAGGCUC  
>piR-mmu-187454  
UGUAAAAUAAGACAUUUGUAGGCUGGUGUG  
>piR-mmu-29349  
AUACAAACAACAUUAAAUGGACUCAGCAG  
>piR-mmu-128637  
UUGCUCUGUAGUUCAGCUUAAUGUCAGGCA  
>piR-mmu-105651  
UCUGAUGAGAGUUAGGCAGCAUGGGGACA  
>piR-mmu-83109  
UGGCUGGAAUUCUUCUGAGGGAUUGAUGGU

>piR-mmu-45671402  
UGGGUCUGAGGGUAGAGGAAGGGUGA

>piR-mmu-4281  
AGUUUAUUAAGGAAGAAAGCAUCUCGGGG

>piR-mmu-45979  
UAAAGAAACUCUACUGCAUGAAGCUAUGG

>piR-mmu-170408  
UUGAAGGUAGAGAAGGUUACCCCAAAUUGGGU

>piR-mmu-48811359  
UGCAAGUCGGAGUAGACAGUUGAGGAGUGGU

>piR-mmu-77692  
UAACUGGGUAACUCGUUGGAAAUGGUA

>piR-mmu-208651  
UAUGUCUCAUAAAGACUGUUGGAAUAGGGUG

>piR-mmu-73533  
UGAGAAUUAUGACAGAGCUAGAUGGUGCAG

>piR-mmu-43196  
UUCUAUGGACAGAAAGGAAAGCAGAUGGU

>piR-mmu-75011  
UGCAAGUGUUCGGGUUGCUGACUGCAGAGG

>piR-mmu-29276  
UGUGAAGACUUCAUGACGUUUAAGGCAUC

>piR-mmu-81510  
UGACAGAGCUCCGACAGUACAAAUAGAAAUGC

>piR-mmu-52608  
UUGACAGUUAUCUCCUGCUGUAGGAGGCAUU

>piR-mmu-74575  
UGGACUCCUGGACAGACAGACAUACUGCCUC

>piR-mmu-82026  
UAGGAUGGGGAUAGAGUGUAUGAUGACGGA

>piR-mmu-68191  
UCUCAGGACCCACAUGAUGGAAAGAGCAGA

>piR-mmu-74117  
UAGGACAGAAGGAUUAAGCAGCGCAGUA

>piR-mmu-49418454  
UUGGCAAGUCUGUUGGAUCAGGUUGACUGU

>piR-mmu-164390  
UAUGCUAGAGAACAGGACACAGAAGG

>piR-mmu-78774  
AAAACAAUGAGGAGAUGGGUACUGUGGGA

>piR-mmu-1925374  
UAGGGAUGAAGCGGUCUGGGUGGUGUCU

>piR-mmu-44586  
UGGGAUGUAAUAUUGAGUGAGUUGAUCUG

>piR-mmu-78913  
UGCAGGCAGAACAUCUACACAUGAAAUA  
>piR-mmu-100208  
UGUGCAGGACACAGAAGAGCUUAUGGUUAU  
>piR-mmu-73043  
UAACAUUGUAGACAGGCACAAAGAUCCCCUU  
>piR-mmu-75186  
UAGAAGCUGUACUUGUCAGGGAGAGGACUC  
>piR-mmu-48946924  
UAAAAGAGGGCAUUCGGUAGUUGGGCAGU  
>piR-mmu-74396  
UAGAGCAUUGUGAAUGAACUAAGAGGCUAC  
>piR-mmu-74956  
UAGAGACACCAAUGAACCAGAUCUGCUA  
>piR-mmu-26697  
UGGGCAAAACAUGUGCAGUUGAUUCUAGCU  
>piR-mmu-81499  
UCAGAGAAAUAAGUAGAAAGAGUGACUGG  
>piR-mmu-85363  
UUGGUGAUGUAGAAAACCUCUGUGAAGAUGU  
>piR-mmu-49462546  
UAGUUCUUUGUCUAAGGCUGAAGACUUAGU  
>piR-mmu-924770  
UCUUUGUGAUGGUCAGGCAAGGUGAAGGGG  
>piR-mmu-150913  
UAAUGCUGGUAUUCUGAGCACCCGGUAC  
>piR-mmu-34658  
UAUAAAUUGCAGGAGAAUCGUAGAUGUGG  
>piR-mmu-73759  
UCUAAAAGGAAGGAAUGAUACUGGUAUG  
>piR-mmu-3600  
UAAAAGGAAACACACGGACGAGGAGAUGGC  
>piR-mmu-164941  
UCCAGAUAGAAACUGGAUCGGAGUUGGGG  
>piR-mmu-85257  
UCGGACCAGAGAAGGAGAACAGAAAUGGCC  
>piR-mmu-80618  
UCAGAGGCAAAGAGAACAAGCAAGAGCAAC  
>piR-mmu-48984205  
UGCUUUUGUCUAGAGGUAGAGAGAUGUGGU  
>piR-mmu-77990  
UUUGAUAAAGUAGAAUAGCACUCCCAGA  
>piR-mmu-80024  
UCUUGAUAGUAGAAAUGUCCUAAGCAGC

>piR-mmu-80143  
UCCUCGAGUCUAAGGACUUAGUAUAGUAGA  
>piR-mmu-109173  
UUAUCCCGUAGACUCUGGUGAACAGCUGGGC  
>piR-mmu-21090  
UAAGAUGGAGUCUAUUAGGCAGAACACAGU  
>piR-mmu-38078  
UAAAAGAUAGAACUCUUCACACGAGGUGCUG  
>piR-mmu-75807  
AGUAGGGUUUUGUAGCUAAACUAAUCGGCGU  
>piR-mmu-77727  
UCUCUGGAUGGUAGAGGCGUGCUUUGCAUU  
>piR-mmu-15544  
UGCACUGUAGGAUGCAAUGGGAUUUGGAAU  
>piR-mmu-73352  
UACUCUCUGACAGAUGUGAAGAACAGGUU  
>piR-mmu-77447  
UGAGACUCUUGGACAACAAGUUUCAAAAUGGU  
>piR-mmu-49336197  
UUCUAGACAGGACAGGAGGCGACCACUCCAU  
>piR-mmu-81739  
AUGUCUCUCUUCUCUGUAGAUUCAAGUAGGC  
>piR-mmu-76962  
UGAAACGAGACUUAAGAGGCUUCAGGGAGGG  
>piR-mmu-77408  
UUCAGUACUGACAGCAAGGACACGAAGGGA  
>piR-mmu-14139  
UGAUUUGGUUGACUCUGUUAUGGAGAUGGU  
>piR-mmu-76062  
UCAAUGCUGUGGUUAUGGCAUACAUCUUU  
>piR-mmu-116925  
UCUAAGCACAGAUCCAAGAUCAGGGGAGGC  
>piR-mmu-86979  
AGCUUCAAUAGUAGAUGGCAGGAUCCUGA  
>piR-mmu-94137  
UACAAGCUGUGGGCAUCAACUGUCUCGAU  
>piR-mmu-74097  
UGGACAGAAGAAUCCCUAGGGAGGCAGGGC  
>piR-mmu-48867504  
UGGGAUUGCUGGCCAAGCACAUAGAACUGU  
>piR-mmu-9913  
UAAGGAUUCUGGGAAAUGUAGUUGGC  
>piR-mmu-73233  
UUAUUGUAGUAGCACAGAGGACUGACCGG

>piR-mmu-42729  
UUAUUUACCUUUUUGAGUGCUUGUGACUGU  
>piR-mmu-13001  
UAGGAAUGGUCAAAACUUGACCUGGGCUGU  
>piR-mmu-107021  
UCUGUGUUGGCUGCAUCAAUCCCUCUGGGGAAC  
>piR-mmu-74879  
UAAAAUAAGUGCUGGUGGUAGAAAGGAG  
>piR-mmu-68407  
UCUGAGGGAUUGAUGGUACCAUAGGCAGU  
>piR-mmu-62309  
UAGAAUCUGAAAAGCCCAAGAAUGGUGAACA  
>piR-mmu-78240  
UACAGAAUCAUUGGAAAGGGUAGGAGGCA  
>piR-mmu-71956  
UGCAAAGACCCUCGGAUGGGAGAAGGGUGU  
>piR-mmu-41234  
UGGGAUGGUAAUUGGAGUUACAUGUGUGA  
>piR-mmu-50554157  
UAGGGAUGGGAAGUUCUUCAGAAAGGGACAGU  
>piR-mmu-73102  
UUUGACAUUAGAACAUUUGCCGAAUGGGUU  
>piR-mmu-50876664  
UGACUUUUUCUCUGGGGUUAGAAGGGCCAU  
>piR-mmu-49774584  
UGGAGAAAAGGCUAAGACUACUGGGACUGU  
>piR-mmu-74321  
UGGACUUUUUCUAAAAUUUGCUGAGAGGGU  
>piR-mmu-83137  
UUUACAAGACUGAGUGGGUAAGAUGGAGGA  
>piR-mmu-1216006  
UGCUUUUAACACAGCACUGAGGAGGU  
>piR-mmu-165607  
UCUUUUUAUCAGGGUUAGAGAUCUUAAGGG  
>piR-mmu-20366  
UAGGAUUCUGCAGACGGAAUACACAUCUU  
>piR-mmu-76301  
UAUCCUCUGAAUGAGAUGGCCAGGACUUC  
>piR-mmu-74502  
UGAAAGUUGUAGAAUGUGGCAGAGCCGGA  
>piR-mmu-3220  
UGGAAGAAGGACCUGCAUAGUGAAAGUGAC  
>piR-mmu-73108  
UGUUUCCAUAUUCAGAGCUGAAGGACACA



>piR-mmu-77006  
UGUAUGAUUGAAAUGCUAGUGAGUGGAGAC  
>piR-mmu-944825  
UGAGGAAUACACUCUCUGCUGGCAUG  
>piR-mmu-10646352  
UGAGCAAGGAACAAGGAGCUAGGG  
>piR-mmu-80305  
UCAGCUGCAAGAAGACACUGUUACACAGU  
>piR-mmu-73126  
UGAAUUAACUCUUGCUUGCACACGGACAA  
>piR-mmu-50895815  
UGCAUUUAUCAGUAAGAAGGGAGGGCUGU  
>piR-mmu-74707  
UGUUUAAAUAUUUAUGGACAUGGAAGAAUGC  
>piR-mmu-73841  
UGUAUAAAUGGACCAGGUGUGAGCAGUG  
>piR-mmu-78095  
UUGGAACCCAUGUUGGAAACAGAGGACAGG  
>piR-mmu-81405  
UAGAUUGUUGGUAGGUUUGGGGAAGGAUC  
>piR-mmu-80201  
UCCAGGCAUGAGCACCUGCUUCUGACAGCAUU  
>piR-mmu-49369804  
U AACUGAGAUGCUGAGACCAUGGAGUAGGU  
>piR-mmu-3250  
UGGAAGCAAUACUGAUACCGUAGACUUGA  
>piR-mmu-16794  
UGAAGCAAACGUAGUGGAACUGGCC  
>piR-mmu-83300  
UACUAAAUCCCAAGUAAGUAGAGGUGGCUU  
>piR-mmu-74881  
UGAAUAAAGCUGGAAGCAGAGAACAGACUC  
>piR-mmu-31015  
UACAAGAAUUGCUGAAAACUGUCUGAGGGU  
>piR-mmu-50457529  
UGCUGACUGCACACACCCUUGACUGAGCAU  
>piR-mmu-282968  
UGUAAGCUGCUCUGAAUUGCAGACUUGGCUGU  
>piR-mmu-91413  
UAGAGAUUGAGGACAUUAUGUAGCAGGGG  
>piR-mmu-77912  
UGAGAUUAGUGAUCCUUGGCCUUGCAAAGA  
>piR-mmu-37656  
UGAGAUUAAAGGCAUGCACCAACACAAUUAU

>piR-mmu-86819  
UAUUCCAGAGAAGUAGAAUGGUGUAUAUC  
>piR-mmu-76972  
UAACAAUGGGAACUAUAAGUGGGGAAGAA  
>piR-mmu-27457  
UAGCUUAUAACUCUGAAUCUAUAUGGCUC  
>piR-mmu-105741  
UGACUCCAGAGGAUUUGCAACAACACAC  
>piR-mmu-92770  
UGAAUGAAUGAAUGAAUGAAUGGGGGUGU  
>piR-mmu-73822  
UAAGGAAUAUGUGACAGCAUAAGAGAUGCGU  
>piR-mmu-80955  
UCCAUGAACUCGGCAUAUUCUCAGCUCUC  
>piR-mmu-76902  
UAGCAAACACCAAUACGACUCAGCAGCUGU  
>piR-mmu-59217  
UAGCAGAAGUUAGGGACAGAUAGAUGG  
>piR-mmu-26448  
UUCAAAGGCAAUUGCUUUGGUUGACUGG  
>piR-mmu-74010  
UGGAAGCAAAGGAAGACACUCUGAGUCUAU  
>piR-mmu-76926  
UCAAGUUCUUUAUAGAUCUGAAUUGGAUUG  
>piR-mmu-50950262  
UAAGAUUCGUAGGGCAUGGUACACGGUU  
>piR-mmu-74181  
UGCACAAGUAGCCUGAAGGGCUUUCUCCCU  
>piR-mmu-58687  
UCUGAGAUGCAGUUGUGCCUGAUAGGAGG  
>piR-mmu-49208365  
UAGAUGCAGUAUGGAGACUAUGGUGGGAGU  
>piR-mmu-73229  
UAGGACUCACGAAGAGGCAUUAAGCUGCAGA  
>piR-mmu-73056  
UAGGACUCCAGAUACCAGAACAUUUUGGCUU  
>piR-mmu-345193  
AUGAGAGGUGUAGAAUAAGUGGGAGGCCCCCGGC  
>piR-mmu-73338  
UAAGACAAAACUGGUAUGAAAUGGCUCUC  
>piR-mmu-272715  
UGAGAUACUCUGGGAAUGGUGCGCCUCUG  
>piR-mmu-73577  
UGAAAAUAGUAUGUUUGUAUGGAUCGGGGC

>piR-mmu-73225  
ACCAGGCACGAGAGCUUUGAGGAUUGCAUU  
>piR-mmu-634780  
UCUUGUCAUGGAUGUGAUUAGGAUGUUGGG  
>piR-mmu-21998  
UAGAACUUCUGACUGUUCCUCUUCGUUCCU  
>piR-mmu-190227  
UUGAGAACUGUGGGAGAGCAUCAGAGGCC  
>piR-mmu-124136  
UGUGAGAAACGAGCAGGCCCUUGGAACCG  
>piR-mmu-17210  
UGAUGAAGGAUUUAGAAGGAUACUAUAGA  
>piR-mmu-36936  
UGUAAUGUUGUAAAGAUGGUUUCUGUGGUA  
>piR-mmu-75930  
UAUCAUUUGACUGCUUGUUGGAUCUAUGGU  
>piR-mmu-91860  
UCUGAACUGAACAGACCGAAGAGAUGUGC  
>piR-mmu-73884  
UUGUAGAAACGAUUCAUCAAACAGGCUU  
>piR-mmu-33738  
UAGAAAUGUCUAAGCAGACCUGACAGUCCA  
>piR-mmu-52855072  
UUGUAGAAUGGAUGCAGGCCUCACCCGGU  
>piR-mmu-5379878  
UGGACAGAGAGAGUGGCUUUGCUUCC  
>piR-mmu-58801  
UGGGCAUUGUAGAGACAUGGCAGGUUCUA  
>piR-mmu-48981244  
UAGGAUGAGGAUGAAUGUCAGUUGCAAGGU  
>piR-mmu-52473546  
UAAGCUGUGAAUGACUGUGCUGGGGGAGGU  
>piR-mmu-267827  
UCUGUUAGAACUGUUGCUAGAGGUAGGGG  
>piR-mmu-74469  
UGCUCUGAGUAGUUCUGCUGUAGGAAAAGGC  
>piR-mmu-77838  
UAUUUUCUGAGCAUUUUGGCAACACCAU  
>piR-mmu-623433  
UUGCUGGGGAAGACUUUUGAAGAUGAGAGG  
>piR-mmu-96112  
UGAGACCAAUGACUGCAUACAGAGAGGUGC  
>piR-mmu-74822  
UUUGAGACAAGUUGUUUGCAGAUUUUA

>piR-mmu-96195  
UGGGACUCUUUGGAGCUGCAGGCUGUAA  
>piR-mmu-73202  
UGGAACUUGGGAAGACUCAUAACUGUCCAUUC  
>piR-mmu-74222  
UGGAAUUGUAGUUAGGAGCCAUUGAUGGGU  
>piR-mmu-83773  
AUGGAUGGAUGGAUGGAUGGUUUUUUAUGU  
>piR-mmu-73452  
UGGGAUGGAUGGCAUGCCAUUGUGUACUCU  
>piR-mmu-109833  
UAAAUUUAAAGUAUGGGCAUUGAGGGGAGGA  
>piR-mmu-49019670  
UAAAACUGUAUUUGAAUUUGGGGCGAGCAU  
>piR-mmu-78034  
UAGGGACUGACUAGAAAGAAAGGUCAAGGA  
>piR-mmu-25233  
UGAUGACGUGUAUGGUCUUUGACAGAUGGC  
>piR-mmu-75330  
UGGAGUUACAGAUCGUUGUGAGCUGGCAUA  
>piR-mmu-50797023  
UGGAGUUACAGGCAGCCAUGAGUCACUCAAU  
>piR-mmu-44433  
UGAUUAGAUGAAUAUGGUGAUGUGGCUGA  
>piR-mmu-77276  
UAGGAAACAAGGGAAGGGAUGUUCACAGA  
>piR-mmu-22943  
UUCUAAGGGCGUCGGAAUGCUCCAUCGGC  
>piR-mmu-119189  
UACAGUCACAAACAGGAUGUAGGGAAGGGA  
>piR-mmu-75526  
UAGAGUUAGAGGUAGAAGUGUAUAGUGCAG  
>piR-mmu-250470  
UAACUGAAGAGAUGGGCAGAGAUGGGGUUA  
>piR-mmu-98421  
UGUUUAACUGGGCGGAAGUUUAACUGGGA  
>piR-mmu-114660  
UGAGAAAUGGGAGAGUAUAAGAGCAGAGA  
>piR-mmu-56727  
UACAAGAAGCUUGGAUCUGAGGUGUGCAU  
>piR-mmu-73778  
UAGGAUUUUUUUUUAGUCUGGUCUAGGAUA  
>piR-mmu-119529  
UAUAAAGGUUUAGUAUCAUGGGGUGGAUGG

>piR-mmu-25581  
 UGAUUUUUGAUUUUCUAGCUACGGUUUGCCC  
 >piR-mmu-50661917  
 UUAAAGGAAUUUAGAAAUGGGCUCAAAUGU  
 >piR-mmu-44534  
 UCAGAAGAGAUUCAGGAUCGUUAGAGAGG  
 >piR-mmu-39773  
 UAGUGAGGUCACUCUUAGUUGGAUGGUAUG  
 >piR-mmu-77593  
 UCUCAGAAAUUGGCAUGACUCCCUUGGG  
 >piR-mmu-74686  
 UUGGAUUCUGCCCCUUGACUGAAGCUGCUU  
 >piR-mmu-47120  
 UGCAGAAGCAAAGAACAACAGAUGACA  
 >piR-mmu-52772  
 UAGGACACGAAGUCUUGGAUCCGUGUGG  
 >piR-mmu-7662  
 UGGUCUGAUUGCUCUCUUAUAUUCGGUGU

(2) List of 709 samples in  $S_{\text{non-inst}}^+$

>mmu\_piR\_038638 | gb | piRNA\_1683 | Mus\_musculus:17:27060780:2706080  
 3:Plus  
 UGAGCUCUUGGGGAAACUGCGUUC  
 >mmu\_piR\_035721 | gb | DQ723674 | Mus\_musculus:17:27017943:27017967:  
 Minus  
 UUUUCACCAUGUGACCUGCCGCCGC  
 >mmu\_piR\_024983 | gb | DQ708095 | Mus\_musculus:19:41916189:41916213:  
 Minus  
 UGUAAGAUCUGCUCUAACCAGGCGU  
 >mmu\_piR\_008186 | gb | DQ566528 | Mus\_musculus:5:113581936:113581960  
 :Plus  
 UAGCUCCGUGGCUGUGGUCCCCUGC  
 >mmu\_piR\_020492 | gb | DQ701563 | Mus\_musculus:11:108827972:10882799  
 7:Minus  
 UCCAGUGCGGUAACGCGACCGAUCCC  
 >mmu\_piR\_026880 | gb | DQ710852 | Mus\_musculus:15:74465061:74465086:  
 Plus  
 UAGCAGAACUUUACAAGAGUUACUG  
 >mmu\_piR\_017463 | gb | DQ697083 | Mus\_musculus:12:103806287:10380631  
 2:Plus  
 UGGAAGGACUGAGGACAGGUUUCGCA  
 >mmu\_piR\_039864 | gb | piRNA\_755 | Mus\_musculus:15:59084403:59084428  
 :Minus  
 UAGUACAACGGCUGGGCAAGCCAAUG

>mmu\_piR\_002245 | gb | DQ545834 | Mus\_musculus:4:61711897:61711922:Minus  
UGAAGGUCCUCUCUCUCGUUCUCGGC

>mmu\_piR\_034702 | gb | DQ722160 | Mus\_musculus:14:43699754:43699779:Minus  
UGGCAGCUCACACACUACUGCCCUUA

>mmu\_piR\_017163 | gb | DQ696640 | Mus\_musculus:9:54051184:54051209:Plus  
GGAAAAUUCUCAGAUGUCCAAUGUU

>mmu\_piR\_002077 | gb | DQ545212 | Mus\_musculus:7:125121256:125121281:Minus  
UGAAAGGAUCGGGUGAUAGCAGGCAA

>mmu\_piR\_033819 | gb | DQ720896 | Mus\_musculus:15:74466623:74466648:Plus  
UACUUGUCUUACAGGCAUCCCAAGC

>mmu\_piR\_012332 | gb | DQ689436 | Mus\_musculus:9:67503628:67503653:Minus  
UUAGAGCAGCUGCUUCCAAGUGUCU

>mmu\_piR\_035164 | gb | DQ722847 | Mus\_musculus:18:67163240:67163265:Minus  
UGUGAGAGGCUUGUCAGUUUCAUUGA

>mmu\_piR\_015845 | gb | DQ694703 | Mus\_musculus:4:93820631:93820657:Minus  
UGUCAACUAUUCUAGUGGUCAUUAUGC

>mmu\_piR\_014725 | gb | DQ693036 | Mus\_musculus:8:96304260:96304286:Minus  
UGCCAAGAUGUAACUGACAUGCACUC

>mmu\_piR\_022245 | gb | DQ704137 | Mus\_musculus:6:127763798:127763824:Plus  
GGGUCUGAUUUCUGAAGUAAGGAAGGC

>mmu\_piR\_002647 | gb | DQ547188 | Mus\_musculus:7:69791191:69791217:Plus  
UGAGAGUAAUGAGGUCGGAAAGAAGGG

>mmu\_piR\_036648 | gb | DQ725002 | Mus\_musculus:6:83551753:83551779:Plus  
UGUCAUAGCACACCUCAAUGAAGCCCC

>mmu\_piR\_016994 | gb | DQ696390 | Mus\_musculus:17:27084753:27084779:Plus  
UAGUCAUCUAUAGUCCUAAUGCCCCC

>mmu\_piR\_033637 | gb | DQ720623 | Mus\_musculus:14:64514342:64514369:Minus  
UGGUUAUCCGUGGAACUGGUCUGUAUGA

>mmu\_piR\_008641 | gb | DQ568060 | Mus\_musculus:7:72989901:72989928:Plus

UAUCCAGAGCAUGAGGAGUACUUGUGAU  
>mmu\_piR\_008191|gb|DQ566544|Mus\_musculus:6:127772753:127772780  
:Plus  
UAGCUGUGACCAGGUCAAGUCUCUUGGA  
>mmu\_piR\_035927|gb|DQ723972|Mus\_musculus:6:85077807:85077834:M  
inus  
UAGGAUUUCCAGGGCACAGCAGGGCAGC  
>mmu\_piR\_024230|gb|DQ707033|Mus\_musculus:15:59079750:59079777:  
Minus  
UGGGAGUUCAUUAAGAGCAGGAAGCAGU  
>mmu\_piR\_015927|gb|DQ694825|Mus\_musculus:14:18424089:18424116:  
Minus  
UGCAAAGCGACGGUGCAAGGUUUCAGCC  
>mmu\_piR\_027081|gb|DQ711137|Mus\_musculus:6:127795620:127795647  
:Plus  
UCCAGAUAAAGAUUGGAGACUCCCAACUA  
>mmu\_piR\_028590|gb|DQ713311|Mus\_musculus:6:81864675:81864702:M  
inus  
UGCAGAGAGAAAAGAAAAAGUUUUAGGC  
>mmu\_piR\_030470|gb|DQ716012|Mus\_musculus:17:26685713:26685740:  
Plus  
GACCCCAUCAAGUGCACAGCGUCCAGUC  
>mmu\_piR\_021675|gb|DQ703258|Mus\_musculus:7:73655357:73655384:M  
inus  
UAACACAUGCCAAGACAAGGAUAAAACC  
>mmu\_piR\_006302|gb|DQ560847|Mus\_musculus:9:67511756:67511783:M  
inus  
UUAGGUUGUUUGGGGAUUCUGAGCAGUG  
>mmu\_piR\_003483|gb|DQ549999|Mus\_musculus:12:98802042:98802069:  
Minus  
UGCCAGUUGUCCAAGACUCUUAAGCCU  
>mmu\_piR\_037903|gb|DQ726799|Mus\_musculus:5:113570499:113570526  
:Minus  
UAAAGGCACAAACCAUCACACCUGGACC  
>mmu\_piR\_023174|gb|DQ705461|Mus\_musculus:5:144021994:144022021  
:Plus  
UCCUGGAAGCAAAGGUUCGAGACCAUUC  
>mmu\_piR\_012039|gb|DQ688975|Mus\_musculus:4:134900057:134900084  
:Plus  
AAAUUGAGUACCGGCUGGUCCAAGAGUG  
>mmu\_piR\_010676|gb|DQ686886|Mus\_musculus:15:59118049:59118076:  
Plus  
UGAUGUCCUCUCAGAUGAAACUGAUUUC  
>mmu\_piR\_038485|gb|piRNA\_1378|Mus\_musculus:17:27065935:2706596

2:Plus

UGGGGGAAGUGUUACAUCCAGAAGAGAC

>mmu\_piR\_021957|gb|DQ703685|Mus\_musculus:7:69791068:69791095:Plus

UGAAAUCUGUUAAAACUGUUUGAGAGAA

>mmu\_piR\_032176|gb|DQ718419|Mus\_musculus:17:27044790:27044817:Minus

AGCCUCUCGUGAAGCCUUGUUUGGCCUC

>mmu\_piR\_016377|gb|DQ695487|Mus\_musculus:18:67181743:67181770:Minus

UGGGUUUCUUUAAUGGUGUAUUGGCCA

>mmu\_piR\_022652|gb|DQ704728|Mus\_musculus:1:158477817:158477844:Plus

UGAAAAAGAGGAACGCCCCACGCCCCC

>mmu\_piR\_008231|gb|DQ566702|Mus\_musculus:7:69786798:69786825:Plus

UAGGACAGGUAGGUGAUGGCAAUAUGA

>mmu\_piR\_006760|gb|DQ561908|Mus\_musculus:2:92370538:92370565:Plus

UUGCCUUCUGUGGGUUUUAUAGAGAGAU

>mmu\_piR\_028086|gb|DQ712600|Mus\_musculus:7:69806428:69806455:Plus

UAGAAGCUGUAAGAAGCUCAGACAGUGC

>mmu\_piR\_001287|gb|DQ542941|Mus\_musculus:10:75302525:75302552:Plus

UCCGCCUUCAUGAAUUCUCAGGGACCUG

>mmu\_piR\_037786|gb|DQ726627|Mus\_musculus:17:26668031:26668058:Minus

GAAA AUGCAGAAGCCUAACAGGAGCCAC

>mmu\_piR\_013278|gb|DQ690878|Mus\_musculus:4:42010308:42010335:Minus

UCCAAGCAUUUGACGGGUGACGCUGAA

>mmu\_piR\_003071|gb|DQ548545|Mus\_musculus:15:59108132:59108159:Plus

UGAUUGGUGAUGAGGAUAUGGAGAUGCA

>mmu\_piR\_024094|gb|DQ706835|Mus\_musculus:9:67540563:67540590:Plus

UAUGUUUACCUCACCAACUACACUUGGA

>mmu\_piR\_029069|gb|DQ714015|Mus\_musculus:14:43700806:43700833:Minus

UAUCUAAAGUCUCUUAUCUCCUGGUGCA

>mmu\_piR\_033562|gb|DQ720512|Mus\_musculus:10:62073759:62073787:Plus

UAAUUCGACUUGCUCUGGGUCUCAAGCC



>mmu\_piR\_025255|gb|DQ708494|Mus\_musculus:9:67498289:67498317:Minus  
UAACCCAACUGAAUUUCCUGCCAAGGCUC

>mmu\_piR\_032968|gb|DQ719586|Mus\_musculus:15:59097466:59097494:Minus  
CUCUCAAAACUUAAGGAUACGUGUAGCUAG

>mmu\_piR\_007304|gb|DQ563476|Mus\_musculus:4:42008088:42008116:Minus  
UAAGGGUGACUUGGAUCAGGCAUGUCUGC

>mmu\_piR\_001940|gb|DQ544764|Mus\_musculus:15:83186573:83186601:Minus  
UCUUCAGGCAAAUGUAAGCUACAGGACCA

>mmu\_piR\_001405|gb|DQ543306|Mus\_musculus:18:67160770:67160798:Minus  
UCCUCUUCAAGAAGAAGUGUCUGUGCUGG

>mmu\_piR\_017520|gb|DQ697167|Mus\_musculus:5:22938598:22938626:Minus  
UAAGAGCAAAUGAGAGUGAAAAGAAUUGA

>mmu\_piR\_003281|gb|DQ549345|Mus\_musculus:2:92342265:92342293:Plus  
UGCAGUGC AAAUGUAUUGGUAGGCCAAAU

>mmu\_piR\_003807|gb|DQ550872|Mus\_musculus:1:93234015:93234043:Minus  
UGC UACCCUAGUGUGUCACUUUUUAAAC

>mmu\_piR\_002542|gb|DQ546847|Mus\_musculus:11:103256160:103256188:Plus  
UGACUUGCAGGGGCCAGUUCUCUCCAGUU

>mmu\_piR\_027016|gb|DQ711034|Mus\_musculus:11:53828745:53828773:Plus  
UGGGAUUUAUAGAUGAAAUACUGGAUCAUA

>mmu\_piR\_003240|gb|DQ549233|Mus\_musculus:10:66092826:66092854:Minus  
UGCAGAUCAUUUUGCCCGGCUCUCUACUU

>mmu\_piR\_036781|gb|DQ725178|Mus\_musculus:11:50786956:50786984:Minus  
UGAAGUAUCCAUCUGAGGUUUUUUUCUC

>mmu\_piR\_016454|gb|DQ695612|Mus\_musculus:10:66089900:66089928:Minus  
UGUAGCCAAAAUGCUUCUAUUUAUAGUCAG

>mmu\_piR\_016027|gb|DQ694973|Mus\_musculus:9:67550119:67550147:Plus  
UGGCAUAACUUACACACUGUUCUACUAUC

>mmu\_piR\_000889|gb|DQ541681|Mus\_musculus:6:38541813:38541841:Plus

GCUUACAAGACAAGGUUUUAGUUGUGUCC  
>mmu\_piR\_003186|gb|DQ549058|Mus\_musculus:5:150061989:150062017  
:Minus  
UGCACACACACAUCCCCUCAGUAUGGCC  
>mmu\_piR\_006973|gb|DQ562424|Mus\_musculus:13:50383178:50383206:  
Plus  
UUGUGUGUGGCCCCCUUGAACAAGUUGCC  
>mmu\_piR\_036126|gb|DQ724261|Mus\_musculus:5:113564531:113564559  
:Minus  
UGACCCUGGUGACUGAAGCGAAGUUUCCC  
>mmu\_piR\_029809|gb|DQ715058|Mus\_musculus:10:75302451:75302479:  
Plus  
UACCAAUUCUAAAUUGAGCUGGGCCUU  
>mmu\_piR\_008762|gb|DQ568393|Mus\_musculus:7:69813817:69813845:P  
lus  
UAUGGUACAGUUGUGUGCCUGGAUCUUC  
>mmu\_piR\_012370|gb|DQ689493|Mus\_musculus:15:83185395:83185423:  
Minus  
UGAGUCUUAAGUUACAGGCACAAAGCUGC  
>mmu\_piR\_008612|gb|DQ567993|Mus\_musculus:5:150070620:150070648  
:Minus  
UAUCAGGGCUCUCGAAUUUAUCCAUCUC  
>mmu\_piR\_005889|gb|DQ557721|Mus\_musculus:15:59088346:59088374:  
Minus  
UGUGCCAAACCAACAAUUGGAGAUAGAC  
>mmu\_piR\_003459|gb|DQ549929|Mus\_musculus:1:93235482:93235510:M  
inus  
UGCCAGCACUCGACCCUUGCUCUUUCUC  
>mmu\_piR\_002997|gb|DQ548299|Mus\_musculus:8:28762248:28762276:M  
inus  
UGAUGAUGUCACGAGUAAGCAAGUGUUGC  
>mmu\_piR\_010785|gb|DQ687061|Mus\_musculus:10:85282150:85282178:  
Minus  
UGAGAUGUGACCCAGGUUCUAGACUGUC  
>mmu\_piR\_029011|gb|DQ713927|Mus\_musculus:6:87959346:87959374:M  
inus  
UGGGAGAUUAGUGUUAAGCUGAAAUCACA  
>mmu\_piR\_000980|gb|DQ541932|Mus\_musculus:1:93235333:93235361:M  
inus  
UCCAACCAGGCCUGAACCCUCUGCAUGAA  
>mmu\_piR\_005323|gb|DQ555792|Mus\_musculus:4:61712243:61712271:M  
inus  
UGGUCUGGUAUUGUGUUCUACCCGGGAA  
>mmu\_piR\_018160|gb|DQ698110|Mus\_musculus:2:100018470:100018498

:Minus  
UACCUUUGAUGAGUAUGAAGUGCCCCUCC  
>mmu\_piR\_012952|gb|DQ690408|Mus\_musculus:2:92381685:92381713:Plus  
UGGAAUUAUCAGAGCUGAUAAAUGUAUG  
>mmu\_piR\_002592|gb|DQ547023|Mus\_musculus:9:54038527:54038555:Minus  
UGAGAAUGCAGGGUGUUUCUGAUGGAUGA  
>mmu\_piR\_021284|gb|DQ702692|Mus\_musculus:5:150097948:150097976  
:Minus  
UAGCAGGUAAUUCGUUUCACUGAGUGAGUA  
>mmu\_piR\_022665|gb|DQ704745|Mus\_musculus:17:66121630:66121658:Plus  
UGGGCUUUGGUGCAUCUGUCUUUGAGUCA  
>mmu\_piR\_003266|gb|DQ549290|Mus\_musculus:6:85480601:85480629:Plus  
UGCAGGGAACCGGGUGCUUCUGGGAUUAA  
>mmu\_piR\_002567|gb|DQ546929|Mus\_musculus:5:150066499:150066527  
:Minus  
UGAGAAAUUUGCUGUGCUGAGAAAUUUGC  
>mmu\_piR\_012552|gb|DQ689773|Mus\_musculus:4:41974663:41974691:Plus  
UUACAUAUAGCUACUUCUUGGCCACCCUC  
>mmu\_piR\_035862|gb|DQ723881|Mus\_musculus:12:98811782:98811810:Minus  
UCCUUUAAGAGUUUCUAGCAUAUCCCAGA  
>mmu\_piR\_011672|gb|DQ688408|Mus\_musculus:1:94827212:94827240:Minus  
UCCUGUAUUAUGGAACAGGCUUCCUCAUA  
>mmu\_piR\_001214|gb|DQ542719|Mus\_musculus:5:144014306:144014334  
:Plus  
UCCCGAGAGCCUGCUGUAAAACGCCAGC  
>mmu\_piR\_008974|gb|DQ569007|Mus\_musculus:15:74483044:74483072:Plus  
UCAAUAAAGGAGUGUGACCUGGAAGUUGU  
>mmu\_piR\_025353|gb|DQ708629|Mus\_musculus:10:62071719:62071747:Plus  
UGGCUUCAUGUUUAUACGUGGUCAAGGA  
>mmu\_piR\_026791|gb|DQ710733|Mus\_musculus:7:73664218:73664246:Minus  
UGACCCAACGUCUAUUUUUUUCCAGGACA  
>mmu\_piR\_022206|gb|DQ704071|Mus\_musculus:18:67183736:67183764:Minus  
UGAGAGGGUUAUAUGACUGCACCCUAAGC

>mmu\_piR\_038073|gb|DQ727054|Mus\_musculus:10:66093207:66093235:  
Minus  
UCCACUUAAGACAGUCAGUUAUUAUUCAA  
>mmu\_piR\_025680|gb|DQ709108|Mus\_musculus:15:78484129:78484157:  
Minus  
UGC AAAUAAAAGAUUGCCAUCAGUGAC  
>mmu\_piR\_002760|gb|DQ547606|Mus\_musculus:5:150093161:150093189  
:Minus  
UGAGGGAUUGAUGGUACCAUAGGCAGUGU  
>mmu\_piR\_029164|gb|DQ714157|Mus\_musculus:10:75286822:75286850:  
Plus  
GCCUUCAUGACAUGUUUCUCUAGAUGCU  
>mmu\_piR\_028003|gb|DQ712467|Mus\_musculus:5:113578266:113578294  
:Minus  
UUCAAAGGUGUGUGUUUCAAACAAGCA  
>mmu\_piR\_027928|gb|DQ712357|Mus\_musculus:6:128412894:128412922  
:Plus  
UGC UAAGAGCAGUGAAUGUCUACACUAGA  
>mmu\_piR\_015283|gb|DQ693860|Mus\_musculus:10:18489950:18489978:  
Minus  
UCACAGUGACUGACUCACCUGUGAGACGA  
>mmu\_piR\_008110|gb|DQ566267|Mus\_musculus:2:92368452:92368480:P  
lus  
UAGCAGGGCCUUUGCUGAUAAUCAUGAUG  
>mmu\_piR\_002906|gb|DQ548001|Mus\_musculus:14:22922977:22923005:  
Plus  
UGAUAAGUAGAGAAUCACAAGGUAGACCU  
>mmu\_piR\_003911|gb|DQ551169|Mus\_musculus:5:150050696:150050724  
:Minus  
UGCUGCGAUAAACACACACGUUUUGGAGG  
>mmu\_piR\_016309|gb|DQ695385|Mus\_musculus:5:113588652:113588680  
:Plus  
UCCGAAGAGAACUUAUUUGGCCUCGCGUG  
>mmu\_piR\_001666|gb|DQ544121|Mus\_musculus:9:67534758:67534786:P  
lus  
UCUAGAGGUUGGAACCUGGGCUCAUGGUC  
>mmu\_piR\_033441|gb|DQ720331|Mus\_musculus:7:72986004:72986032:P  
lus  
UGCUGAUUUGUAAUAGAAGUUUACAAUGU  
>mmu\_piR\_031027|gb|DQ716796|Mus\_musculus:17:27057081:27057109:  
Plus  
UCAGAAGCUGGACUGUGUUAGACCACCUC  
>mmu\_piR\_004674|gb|DQ553767|Mus\_musculus:5:113579738:113579766  
:Minus

UGGCACCUAGGCUGACAUGAGGACAUGAA  
>mmu\_piR\_004642|gb|DQ553684|Mus\_musculus:18:67196550:67196578:  
Plus  
UGGCAACUCACAACUAUGAUUCCUGUUC  
>mmu\_piR\_019313|gb|DQ699820|Mus\_musculus:14:22952762:22952790:  
Plus  
UUAUUUGAAACAUGUGUUUGAGGUUGCA  
>mmu\_piR\_025080|gb|DQ708242|Mus\_musculus:12:98801243:98801271:  
Minus  
UCAAAUAAGCAUGGUAAAUGGUACCUGG  
>mmu\_piR\_008813|gb|DQ568563|Mus\_musculus:5:113588263:113588291  
:Plus  
UAUUCGGUUGGCAGUCUUCCAAUAGC  
>mmu\_piR\_037329|gb|DQ725976|Mus\_musculus:2:150833004:150833032  
:Plus  
UGCACCAAAGCAAUGGACUCACCUGUUC  
>mmu\_piR\_004382|gb|DQ552720|Mus\_musculus:10:87711009:87711037:  
Minus  
UAACACAUGACUGGGUGCUCGGUAAUCUC  
>mmu\_piR\_003446|gb|DQ549868|Mus\_musculus:5:150076695:150076723  
:Minus  
UGCCACUUGACACUUCAAGGACCUCAUGA  
>mmu\_piR\_019479|gb|DQ700060|Mus\_musculus:14:22942469:22942497:  
Plus  
GUGGUCCUAGCUACUCAGGAAUCUGAGGC  
>mmu\_piR\_035105|gb|DQ722762|Mus\_musculus:17:27039226:27039254:  
Minus  
UGGCAGCUCAACUAAAGGAACUUGUCUUC  
>mmu\_piR\_004752|gb|DQ553977|Mus\_musculus:15:38242011:38242039:  
Minus  
UGGCCACUUCAAAUCUUUCUCCGAUGCUG  
>mmu\_piR\_029622|gb|DQ714803|Mus\_musculus:17:66052687:66052715:  
Minus  
UGCAGCAGGGCAUUGCUUUCUCCUUAUCA  
>mmu\_piR\_000792|gb|DQ541456|Mus\_musculus:14:109841558:10984158  
6:Minus  
GAGCAUGUGUCCUUGUUAUGUGUUGGAGC  
>mmu\_piR\_023210|gb|DQ705510|Mus\_musculus:6:127773266:127773294  
:Plus  
UCAUCUAUACACUGGAGUGGAGUGCUUUG  
>mmu\_piR\_010455|gb|DQ686543|Mus\_musculus:4:134899031:134899059  
:Plus  
UGACUAGAUAGGAUUUAAGGAUGGCUCCC  
>mmu\_piR\_031457|gb|DQ717395|Mus\_musculus:7:73014296:73014324:P

lus  
GUCUAGAUUUAGGGUCUGUGGUUAAGAU  
>mmu\_piR\_006204|gb|DQ558508|Mus\_musculus:3:35066557:35066585:P  
lus  
UGUUUUUCAGGCAGUGAAGAGUUAGAGGA  
>mmu\_piR\_019461|gb|DQ700033|Mus\_musculus:8:96308531:96308559:M  
inus  
UGGCAGAUUGUUUGUCUUGAAUGGUGUU  
>mmu\_piR\_029707|gb|DQ714916|Mus\_musculus:9:67495435:67495463:M  
inus  
GAGUUUUUGUCAGUAUUCACCAGGAACUU  
>mmu\_piR\_006472|gb|DQ561203|Mus\_musculus:15:59116412:59116440:  
Plus  
UCCAAUUUGACUUUUGCCAUGGUGUUU  
>mmu\_piR\_013764|gb|DQ691625|Mus\_musculus:10:85169774:85169802:  
Minus  
GACAAGACAAGCUACAAAGACAAUGGAAA  
>mmu\_piR\_029623|gb|DQ714805|Mus\_musculus:9:67524534:67524562:M  
inus  
UCCUCUUAGGUAGAACUGGGUUCACUGGA  
>mmu\_piR\_000489|gb|DQ540675|Mus\_musculus:6:112586127:112586155  
:Minus  
CAUCCUCUUGACAGUUGCAAGCCUGCCGC  
>mmu\_piR\_012738|gb|DQ690053|Mus\_musculus:13:53408633:53408661:  
Plus  
UCCAAGCUCUUGGGAGAGAUGGCUGCUGA  
>mmu\_piR\_017287|gb|DQ696829|Mus\_musculus:5:113565203:113565231  
:Minus  
UGGUUGGUCAUCACAGGACACAAUACUGA  
>mmu\_piR\_005273|gb|DQ555678|Mus\_musculus:9:67510483:67510511:M  
inus  
UGGUAUGUGUGUUCAAUGAUGGAGUGUGU  
>mmu\_piR\_008793|gb|DQ568486|Mus\_musculus:10:60825000:60825028:  
Minus  
UAUUAUGUGCGAAACUCAAUCACUGACC  
>mmu\_piR\_020867|gb|DQ702122|Mus\_musculus:11:103263136:10326316  
4:Plus  
UGUGAGUUUGAGACCAACCUGGUCUACAG  
>mmu\_piR\_009231|gb|DQ569731|Mus\_musculus:4:123343893:123343921  
:Minus  
UCAUCCUUCAGCGACUUGAGGUUGUAACA  
>mmu\_piR\_008374|gb|DQ567223|Mus\_musculus:4:52764059:52764087:P  
lus  
UAGGUGCUUCUCAGUCAUUCGGUAUUCUC

>mmu\_piR\_007844 | gb | DQ565336 | Mus\_musculus:14:22938639:22938667:  
Plus  
UACUGAGUCACCCCAGUUUGUCUUCUCGG  
>mmu\_piR\_002115 | gb | DQ545354 | Mus\_musculus:12:98810475:98810503:  
Minus  
UGAAAUGCAGGCUGCUUCCAUGAGUUUGG  
>mmu\_piR\_034678 | gb | DQ722129 | Mus\_musculus:5:113561725:113561753  
:Minus  
UACUUCAGGCCAGAUGAUGAGGUGUCCUC  
>mmu\_piR\_012183 | gb | DQ689217 | Mus\_musculus:9:54045031:54045059:M  
inus  
UAGAAGUAAAGCCUGUGAAGUAAGUGUGA  
>mmu\_piR\_037214 | gb | DQ725808 | Mus\_musculus:5:108070803:108070831  
:Plus  
UCCACAAGGAACUGAACGACCUGGCCCCAG  
>mmu\_piR\_028580 | gb | DQ713293 | Mus\_musculus:17:27057369:27057397:  
Plus  
UCUAGAUCAAUACCUUUCUUCUCAAUCUG  
>mmu\_piR\_032742 | gb | DQ719253 | Mus\_musculus:17:27074745:27074773:  
Plus  
UGGGGAUCUAUAUGCUUUGGGAGCUCGAU  
>mmu\_piR\_011643 | gb | DQ688366 | Mus\_musculus:14:43699090:43699118:  
Minus  
UACAUGAAGAAUUGGAGGGUAUUGUCAGA  
>mmu\_piR\_003231 | gb | DQ549213 | Mus\_musculus:18:67190854:67190882:  
Minus  
UGCAGAGCCUCAACAGAUUCUGUGGGAC  
>mmu\_piR\_034309 | gb | DQ721600 | Mus\_musculus:10:75281685:75281713:  
Plus  
UAGGAUUGAAGUCCGGCUCUGAAACGUGA  
>mmu\_piR\_011537 | gb | DQ688204 | Mus\_musculus:7:125119785:125119813  
:Minus  
UGC UUAGCUCAAGUAACAAUGAAAGGUAC  
>mmu\_piR\_011559 | gb | DQ688243 | Mus\_musculus:9:54044379:54044407:M  
inus  
GACAAAUGUCAAAAACCUUGGAUGAUCCU  
>mmu\_piR\_014629 | gb | DQ692899 | Mus\_musculus:5:150096408:150096436  
:Minus  
UCAGUUUAACAAGUGUAUCCCAAGGGUGU  
>mmu\_piR\_014638 | gb | DQ692908 | Mus\_musculus:6:128410420:128410448  
:Plus  
UCCAUGAGCCACACUGAUGCUGUCAGCA  
>mmu\_piR\_029139 | gb | DQ714117 | Mus\_musculus:10:127101216:12710124  
4:Plus

UGCACUGGAGGAAGUGUGUAAUGUGUGUA  
>mmu\_piR\_013134 | gb | DQ690673 | Mus\_musculus:5:113565406:113565434  
:Minus  
ACUCGGUCCUCUGCAAGAGCAGCCAGUG  
>mmu\_piR\_032237 | gb | DQ718508 | Mus\_musculus:6:120856298:120856326  
:Plus  
UACACUGUCUAGUGAAGAAAGAAGUUCUC  
>mmu\_piR\_004351 | gb | DQ552641 | Mus\_musculus:3:22717726:22717754:M  
inus  
UAAUGUCUCUGUGUGCUUCCUGUGCCCA  
>mmu\_piR\_031189 | gb | DQ717013 | Mus\_musculus:13:52134949:52134977:  
Plus  
UGAUGUUUAGUGGCUACCUGGAUGGCUGA  
>mmu\_piR\_027995 | gb | DQ712459 | Mus\_musculus:12:98823055:98823083:  
Plus  
UCAAUGGACAAGGGUCCUUUAGGUAGAC  
>mmu\_piR\_029813 | gb | DQ715063 | Mus\_musculus:2:150846240:150846268  
:Plus  
UACUUAUGUGGCCUAUGUUGUAAUGUCC  
>mmu\_piR\_029056 | gb | DQ713998 | Mus\_musculus:4:57453848:57453876:M  
inus  
UAUAUUUAUGAAUGAAUGUUGCAAAAUA  
>mmu\_piR\_029274 | gb | DQ714318 | Mus\_musculus:9:67512007:67512035:M  
inus  
UGGGCAAGUUUGGAGUAGCUCCCUAAUAA  
>mmu\_piR\_002441 | gb | DQ546563 | Mus\_musculus:2:92352348:92352376:P  
lus  
UGACCAGGCUAUAUGAAUUGACUUUCUCU  
>mmu\_piR\_003074 | gb | DQ548556 | Mus\_musculus:3:122010914:122010942  
:Plus  
UGAUUGUGGUAGGGCCUGACCAUGCCUGU  
>mmu\_piR\_015720 | gb | DQ694512 | Mus\_musculus:8:113012029:113012057  
:Plus  
UCAGCACUAUUGACAUUGGAACUGAAUUC  
>mmu\_piR\_034624 | gb | DQ722048 | Mus\_musculus:12:98789186:98789214:  
Minus  
UAAUCAAGAAAGGAAAUCAAGGUUUAGG  
>mmu\_piR\_001811 | gb | DQ544468 | Mus\_musculus:4:93780099:93780127:M  
inus  
UCUGAGGGUGAUAAUCUUGGAAAUCCUGC  
>mmu\_piR\_037215 | gb | DQ725809 | Mus\_musculus:12:98843673:98843701:  
Plus  
UCCUACAAAUUGGCAUCCUCAAUGCAUA  
>mmu\_piR\_015307 | gb | DQ693898 | Mus\_musculus:7:73019093:73019121:P



lus  
UGUGGCAACAGAACUCCUCCACAGGGUCC  
>mmu\_piR\_000190|gb|DQ539987|Mus\_musculus:18:50693193:50693221:  
Minus  
ACACGAAAAGCCACCCUGGUGCUGAGUUC  
>mmu\_piR\_012820|gb|DQ690187|Mus\_musculus:6:128410572:128410600  
:Plus  
UGGGUAAGCCUGUGACUUAGUCUUAUCA  
>mmu\_piR\_016601|gb|DQ695824|Mus\_musculus:18:67187891:67187919:  
Minus  
UCCCAUGCGCAGUGGUGAAUGUGGCUUA  
>mmu\_piR\_017524|gb|DQ697174|Mus\_musculus:7:72991926:72991954:P  
lus  
UACAACCAACUCAUUGACUGUGUACCUGC  
>mmu\_piR\_002367|gb|DQ546270|Mus\_musculus:17:66133304:66133332:  
Plus  
UGACACUGGUGCCGGAUCUGCUGUGUGGU  
>mmu\_piR\_013222|gb|DQ690799|Mus\_musculus:18:35030721:35030749:  
Minus  
UAAGUCUCUAAAGGCCACUGUGGACUCAU  
>mmu\_piR\_030762|gb|DQ716411|Mus\_musculus:18:80291039:80291067:  
Minus  
UGCAAUGAACUCUUCCUGCCAAUGUCUA  
>mmu\_piR\_026764|gb|DQ710692|Mus\_musculus:14:23199432:23199460:  
Minus  
UCCAAAUAUUGCUGUAGGAGGGACCAAU  
>mmu\_piR\_009020|gb|DQ569162|Mus\_musculus:14:18435025:18435053:  
Minus  
UCACAGGACUCUUGUAGUGAAGUCUGCCC  
>mmu\_piR\_013723|gb|DQ691566|Mus\_musculus:18:67164811:67164839:  
Minus  
UAAUAACUUUCUUUGUUGAAAUGCUAGUA  
>mmu\_piR\_025924|gb|DQ709455|Mus\_musculus:5:144022542:144022570  
:Plus  
UAGGCUAGCUAGGUCAAGUGAUUUGGAUC  
>mmu\_piR\_007644|gb|DQ564625|Mus\_musculus:19:37321216:37321244:  
Minus  
UACAUGGGUGACAAGGAGGUCAGGUGUUA  
>mmu\_piR\_019767|gb|DQ700481|Mus\_musculus:2:92377491:92377519:P  
lus  
UUAGAUAGAUGGGAAAAGCUGCGGCUUGG  
>mmu\_piR\_001922|gb|DQ544723|Mus\_musculus:9:54020307:54020335:M  
inus  
UCUUAGAGAUGUUCUAUUGGAAGGUACCA

>mmu\_piR\_025041|gb|DQ708181|Mus\_musculus:10:45564052:45564080:  
Plus  
UGUACAGCAAGAUCUGUGUAAAUGGGGAC  
>mmu\_piR\_032950|gb|DQ719560|Mus\_musculus:7:69796203:69796231:P  
lus  
UCACAUUUCUUAGAUGUUCAAAGCUGG  
>mmu\_piR\_018449|gb|DQ698571|Mus\_musculus:10:18492158:18492186:  
Minus  
UCCUUGCCUUAUGCAUGUAUUGUAGGUA  
>mmu\_piR\_021438|gb|DQ702912|Mus\_musculus:2:136761071:136761099  
:Plus  
UAGACGGGAUUUGAAUUGUUAAUGGCUA  
>mmu\_piR\_027437|gb|DQ711666|Mus\_musculus:2:150838977:150839005  
:Plus  
UGUUAGAGUCAGCUUUGGACACAUUCCUG  
>mmu\_piR\_015743|gb|DQ694540|Mus\_musculus:5:150087156:150087184  
:Minus  
UGUUAUCACAAGACCUCUUGUCAGGCAGG  
>mmu\_piR\_018286|gb|DQ698315|Mus\_musculus:3:20654739:20654767:M  
inus  
UGGAAUAAUCAGGAAUUUUUGGUUUUGC  
>mmu\_piR\_016725|gb|DQ696004|Mus\_musculus:14:22940653:22940681:  
Plus  
GAACUUGGUUAGCUCUGCUCUUCUUGUC  
>mmu\_piR\_009905|gb|DQ685674|Mus\_musculus:5:115101181:115101209  
:Minus  
UACUAAACUGCUUGUUUUCUGGUCUCACC  
>mmu\_piR\_006227|gb|DQ560657|Mus\_musculus:12:98799712:98799740:  
Minus  
UUAAAUAAGCCUUGAGUCCUUAUUUCC  
>mmu\_piR\_013772|gb|DQ691634|Mus\_musculus:15:74469419:74469447:  
Plus  
UGCAUAGUGCUUACUGCAUGAGGCUGUGA  
>mmu\_piR\_028769|gb|DQ713561|Mus\_musculus:8:101010831:101010859  
:Plus  
GAUGUAAACGAAUGGAAUGAUUAAUAAUA  
>mmu\_piR\_004743|gb|DQ553962|Mus\_musculus:17:27068940:27068968:  
Plus  
UGGCCACCAUGACUUUUCGUUUAGCUGCC  
>mmu\_piR\_010265|gb|DQ686220|Mus\_musculus:5:130438397:130438425  
:Plus  
UGCCAAGCUCAGUCCUGUAGGAUCAGAGU  
>mmu\_piR\_000542|gb|DQ540796|Mus\_musculus:17:66101832:66101860:  
Plus

CCCACAAGGAUGCUGCUCACUAAUUUGCC  
>mmu\_piR\_017031|gb|DQ696444|Mus\_musculus:17:66124489:66124517:  
Plus  
UACUACAUUCACAUGGACCACAGACAUAC  
>mmu\_piR\_000796|gb|DQ541462|Mus\_musculus:1:178711326:178711354  
:Plus  
GAGGAAAUUCAGAACCACGUUGCGUCUCA  
>mmu\_piR\_003350|gb|DQ549578|Mus\_musculus:15:59104610:59104638:  
Minus  
UGCCAAACCUCGUGACUGUAAAGAUGAUA  
>mmu\_piR\_004231|gb|DQ552219|Mus\_musculus:7:125121858:125121886  
:Minus  
UAAAAGUUCUAGACUGUGUCCUCCUGUG  
>mmu\_piR\_004968|gb|DQ554624|Mus\_musculus:7:73657459:73657487:M  
inus  
UGGGACAUACUGCCUGAUCUCCUGUGAGA  
>mmu\_piR\_003538|gb|DQ550176|Mus\_musculus:15:74471163:74471191:  
Plus  
UGCCAUUUUUUUUUCAAAAUAUCAAUC  
>mmu\_piR\_006789|gb|DQ561969|Mus\_musculus:10:127102341:12710236  
9:Plus  
UUGGAAUGCAUUGCUUCUAAUGGGUCUG  
>mmu\_piR\_000228|gb|DQ540089|Mus\_musculus:15:78492121:78492149:  
Minus  
ACUGACUCUGAUAGCCUGUCUUUGAUUCC  
>mmu\_piR\_031668|gb|DQ717700|Mus\_musculus:18:67179513:67179541:  
Minus  
UCACAAUCGUUCACAGUGGUCAAGACUUC  
>mmu\_piR\_012475|gb|DQ689648|Mus\_musculus:11:103244148:10324417  
6:Plus  
UCCUGAAGUAGAGUCCACUGAUCUUAGGC  
>mmu\_piR\_000893|gb|DQ541687|Mus\_musculus:5:144022066:144022094  
:Plus  
GCUUGCUUAACUUGCCUGAAGCCCUGGGU  
>mmu\_piR\_006012|gb|DQ558028|Mus\_musculus:10:101641614:10164164  
2:Minus  
UGUGUGUGCCCACUGAUGAAGCCCAUUGC  
>mmu\_piR\_008493|gb|DQ567634|Mus\_musculus:4:93785624:93785652:M  
inus  
UAGUUAAGGGCCUGUCUGAAUGUCAUUA  
>mmu\_piR\_008730|gb|DQ568309|Mus\_musculus:11:27822412:27822440:  
Minus  
UAUGCAAGAAUUACAAUGGCCUAGGGAG  
>mmu\_piR\_009415|gb|DQ684864|Mus\_musculus:6:128155164:128155192

:Minus  
UGGGCUACAAGUGAGACUGUCUAAAAAA  
>mmu\_piR\_035054|gb|DQ722681|Mus\_musculus:6:127777745:127777773  
:Plus  
ACCCACACAGUGGAAGGAGAGAACCUAUC  
>mmu\_piR\_020434|gb|DQ701486|Mus\_musculus:18:67175039:67175067:  
Minus  
UCCACCAUAGCUACCUGGAUCAGUGAUGG  
>mmu\_piR\_013244|gb|DQ690828|Mus\_musculus:18:67167253:67167281:  
Minus  
UACAGGCAUAUAAAAGUAUUAGGGCUCA  
>mmu\_piR\_002846|gb|DQ547834|Mus\_musculus:9:98095458:98095486:M  
inus  
UGAGUGCAGUGGGAUCGCUCUUGUGUUCA  
>mmu\_piR\_035159|gb|DQ722841|Mus\_musculus:15:59116480:59116508:  
Plus  
UCAAACGGCUUUGACGGUGAGUUCUCCAC  
>mmu\_piR\_031614|gb|DQ717624|Mus\_musculus:6:127781356:127781384  
:Plus  
UAAAACUAGCAGUAGUUGAUAAGGUGUUA  
>mmu\_piR\_022655|gb|DQ704731|Mus\_musculus:6:128152783:128152811  
:Minus  
UCUGCAUCUUUAGAAUAAUUGGAGUCAGU  
>mmu\_piR\_025528|gb|DQ708879|Mus\_musculus:8:96309997:96310025:M  
inus  
UAUGAGACUAACCUGUGCUAAACUGAAAA  
>mmu\_piR\_028301|gb|DQ712903|Mus\_musculus:14:18432251:18432279:  
Minus  
UCAUUUAUUUCUUGCCUUUAAACCAAAC  
>mmu\_piR\_012251|gb|DQ689324|Mus\_musculus:9:67506730:67506758:M  
inus  
UACAAACUGGGUGCUCCGUAGGGUUUCUA  
>mmu\_piR\_008141|gb|DQ566353|Mus\_musculus:6:87956582:87956610:M  
inus  
UAGCCAGUCUCUCAAGCCGGAGUCCCCUC  
>mmu\_piR\_005238|gb|DQ555576|Mus\_musculus:12:98803258:98803286:  
Minus  
UGGUAGAAGUAGGUAGCCACAUUGGUGAU  
>mmu\_piR\_006285|gb|DQ560809|Mus\_musculus:18:67170867:67170895:  
Minus  
UUAGAAGGGUGGGUUGACUAUGACACAAA  
>mmu\_piR\_018850|gb|DQ699161|Mus\_musculus:9:67499822:67499850:M  
inus  
UCCUCAGAUGGUGAUAAUAGUUUGUUA

>mmu\_piR\_026377|gb|DQ710139|Mus\_musculus:6:92136659:92136687:Plus  
UAGCCACAUAUCAAACUUCUAUGUUGUC

>mmu\_piR\_035076|gb|DQ722721|Mus\_musculus:15:59088970:59088998:Minus  
UAUGCGUUAUGCUUGUUCUUAUUUUUAUUA

>mmu\_piR\_022148|gb|DQ703975|Mus\_musculus:8:95082728:95082756:Plus  
GUCUAUCCCAUGGUCAAGGACCUGGUGAC

>mmu\_piR\_034952|gb|DQ722530|Mus\_musculus:5:150084119:150084147:Minus  
UCCAGAGGAGUCUGUAAAAGAAGUAAAAG

>mmu\_piR\_012191|gb|DQ689230|Mus\_musculus:7:69808278:69808306:Plus  
UGCCAAUAUAUGGGUCACUUAUGUAGUUA

>mmu\_piR\_008158|gb|DQ566409|Mus\_musculus:12:98825541:98825569:Plus  
UAGCCUCACUUCGAAUUCAGUGUUGAGCU

>mmu\_piR\_006554|gb|DQ561403|Mus\_musculus:2:148919555:148919583:Minus  
UUCGACUUGUGCUAUAGUGAAAUUGGCGC

>mmu\_piR\_024115|gb|DQ706860|Mus\_musculus:4:100105752:100105780:Plus  
UCCAUUCACAGCUGCGACUGAACAAUUGU

>mmu\_piR\_010994|gb|DQ687375|Mus\_musculus:13:52134942:52134970:Plus  
UGCCGAUGAUGUUUAGUGGCUACCUGGA

>mmu\_piR\_001590|gb|DQ543759|Mus\_musculus:15:83181783:83181811:Minus  
UCGGGCCUAUUUGUAGGAUGUGGGACACU

>mmu\_piR\_020936|gb|DQ702217|Mus\_musculus:17:27033693:27033721:Minus  
UGAGUUGCCUGGCUCUGAAGCCUUGCUCU

>mmu\_piR\_004169|gb|DQ551943|Mus\_musculus:8:96308230:96308258:Minus  
GUUGUUCUUGUUGUUUGCCUCUCUCUCUC

>mmu\_piR\_006758|gb|DQ561906|Mus\_musculus:6:127771883:127771911:Plus  
UUGCCUGGGUGAUCUGGUAAAUGGGCUCU

>mmu\_piR\_010055|gb|DQ685909|Mus\_musculus:5:150090142:150090170:Minus  
UAACACUGUACUGGAGUGACGUUCUCAUA

>mmu\_piR\_016015|gb|DQ694952|Mus\_musculus:7:73012154:73012182:Plus

GACCAGCAACAAAAGCAUGAAACCAGCCA  
>mmu\_piR\_025477|gb|DQ708814|Mus\_musculus:9:54013680:54013708:Minus  
GCUUCAGCGACCCUCUAGGACCAGUGUUC  
>mmu\_piR\_017110|gb|DQ696565|Mus\_musculus:5:113573053:113573081:Minus  
UACCUACGAGAAAAGUGCGUCUGAAAUG  
>mmu\_piR\_011328|gb|DQ687887|Mus\_musculus:13:24997914:24997942:Minus  
UUAAGAUCCAAUAGGACCAGCCACCACU  
>mmu\_piR\_009660|gb|DQ685273|Mus\_musculus:6:127783735:127783763:Plus  
UGCACUUGCCUUGGUCUUCAGAACGAUCA  
>mmu\_piR\_031923|gb|DQ718047|Mus\_musculus:9:54018329:54018357:Minus  
UUGUAUCUAAAUAUGGAUGAAUGUAUGUG  
>mmu\_piR\_037568|gb|DQ726323|Mus\_musculus:15:88810129:88810157:Minus  
UGC UUUCACAAUGCUUUAGGCUGUGCUAG  
>mmu\_piR\_007948|gb|DQ565706|Mus\_musculus:12:98801418:98801446:Minus  
UAGAAGACUUGUGAGGUCCAGGGGCUCGA  
>mmu\_piR\_002056|gb|DQ545131|Mus\_musculus:4:93813504:93813532:Minus  
UGAAACUCUCCAUCUGCAUCUGCCUCAGC  
>mmu\_piR\_012939|gb|DQ690387|Mus\_musculus:1:134811251:134811279:Minus  
UGGGAGUCUUUAGUUUGUGCAAACGUGC  
>mmu\_piR\_009204|gb|DQ569640|Mus\_musculus:15:78490853:78490881:Minus  
UCAGUUCUACUGUGCCUUGAGAGGGAGUC  
>mmu\_piR\_006467|gb|DQ561193|Mus\_musculus:6:85954801:85954829:Minus  
UCCAAGCUGGGUGGCCUCUGGACUCUGA  
>mmu\_piR\_005319|gb|DQ555782|Mus\_musculus:X:19979878:19979906:Minus  
UGGUCUCUCGUGAGUUCUUGGGUGUCUGC  
>mmu\_piR\_015007|gb|DQ693468|Mus\_musculus:14:22935205:22935233:Plus  
UGUUUUGGAAUGAAAUCUGUAUGGGGAGG  
>mmu\_piR\_023059|gb|DQ705303|Mus\_musculus:11:104390338:104390366:Plus  
UGCGUUGUACUUGAUCUCUUAAGCAUUCA  
>mmu\_piR\_027923|gb|DQ712352|Mus\_musculus:5:150091394:150091423

:Minus  
UAAAAUUUUUGAUUCUUCACAGCCUGGCC  
>mmu\_piR\_010284|gb|DQ686259|Mus\_musculus:8:23534381:23534410:Plus  
UGCCAACUGAGCUACAUCCUAAGCCCCAAA  
>mmu\_piR\_007568|gb|DQ564405|Mus\_musculus:11:107812607:107812636:Plus  
UACAGAAAGGUGACCUCAGAUACAAAUGG  
>mmu\_piR\_034638|gb|DQ722068|Mus\_musculus:11:103244248:103244277:Plus  
UAGGCAAGACAGACUAUCAGCCCUGCAGGC  
>mmu\_piR\_024443|gb|DQ707326|Mus\_musculus:12:98800838:98800867:Minus  
UAGACAUGGUAUUUGUAUUACUAUAGGAAU  
>mmu\_piR\_036589|gb|DQ724905|Mus\_musculus:17:22224135:22224164:Plus  
UGCUGUGGCCUCCUCAUCACAAAGGGAUCC  
>mmu\_piR\_026546|gb|DQ710384|Mus\_musculus:15:78487587:78487616:Minus  
UGGGCCGUCCUGAACACUACAUCAGUCUCU  
>mmu\_piR\_008701|gb|DQ568211|Mus\_musculus:6:83318083:83318112:Minus  
UAUGACGGAUGCCCUCAGAGCCCUCACUGA  
>mmu\_piR\_034361|gb|DQ721675|Mus\_musculus:14:23195743:23195772:Minus  
UGCAAUCCUUGACUUUCAGGAAUUGUGCAU  
>mmu\_piR\_016409|gb|DQ695534|Mus\_musculus:15:59098355:59098384:Minus  
UCCAGGCAUCAUCUGUGGGUGACAAAUGU  
>mmu\_piR\_020551|gb|DQ701659|Mus\_musculus:12:81598537:81598566:Plus  
UAGGACACCAGCAUUAACCAUUCAGGUUCC  
>mmu\_piR\_020262|gb|DQ701235|Mus\_musculus:15:78482904:78482933:Minus  
UAAAAGAGUGUAUGUUUUCUGCAGGUAUGU  
>mmu\_piR\_028561|gb|DQ713265|Mus\_musculus:6:127753076:127753105:Minus  
GCCAUGGUGUCUGAACCCAGCCAGUCCUAAG  
>mmu\_piR\_023004|gb|DQ705222|Mus\_musculus:8:113017086:113017115:Plus  
GGAACUCCCAUUAACAUGCCUACUUGUGA  
>mmu\_piR\_005212|gb|DQ555435|Mus\_musculus:7:73679013:73679042:Minus  
UGGGUUUAUGCCUAGGAAUGGUAGAGCUGG

>mmu\_piR\_026642|gb|DQ710518|Mus\_musculus:7:72985214:72985243:Plus  
UCCAGUCGAUGUGAUGGAUAUUGUUGACA

>mmu\_piR\_016085|gb|DQ695058|Mus\_musculus:9:67498888:67498917:Minus  
UACGUCAUGAGUAGAUAAGAUGACUGCCA

>mmu\_piR\_028228|gb|DQ712800|Mus\_musculus:5:113581744:113581773:Plus  
UAGGUUCCCCACUCCCAUGAAUUUCCUC

>mmu\_piR\_020498|gb|DQ701570|Mus\_musculus:11:95584011:95584040:Plus  
UAUGGAUCUAGUCCCUCUUGGAGGUUUGU

>mmu\_piR\_007153|gb|DQ562923|Mus\_musculus:10:62064847:62064876:Plus  
UAACCCCGGAACUUUGUGACGACUGCCAG

>mmu\_piR\_025458|gb|DQ708786|Mus\_musculus:4:146039956:146039985:Plus  
UAACUCUAUUUAGUAGAUAGUAAUGCCUGA

>mmu\_piR\_037607|gb|DQ726376|Mus\_musculus:5:130438074:130438103:Plus  
UGAUAUGUAGGAUCCCUCUCAGAUGUCAAG

>mmu\_piR\_015969|gb|DQ694890|Mus\_musculus:9:67528641:67528670:Minus  
UACUCUGGCUUCUCUGGGUUAUAGUGCACC

>mmu\_piR\_014537|gb|DQ692773|Mus\_musculus:6:127800191:127800220:Plus  
UAGAACUACAUCAGCCAGCGUCAGCCCAA

>mmu\_piR\_004916|gb|DQ554389|Mus\_musculus:8:38562499:38562528:Minus  
UGGAAAAGGUGUUUUCUUCUAAUGCAAGA

>mmu\_piR\_033234|gb|DQ720025|Mus\_musculus:4:134900536:134900565:Plus  
UAAACUGGGAUGUGUCCCCUGCAAGCACAC

>mmu\_piR\_013968|gb|DQ691935|Mus\_musculus:10:66091791:66091820:Minus  
GACCAGACUCAGACUUGUGUGUGUUGCAUA

>mmu\_piR\_002402|gb|DQ546417|Mus\_musculus:12:98797482:98797511:Minus  
UGACAUCUCUGACUUUCUGGGGUCUCCAUAU

>mmu\_piR\_001964|gb|DQ544821|Mus\_musculus:2:92385353:92385382:Plus  
UCUUGGUCGUGCCAUAUACUUGUAGAGGGCC

>mmu\_piR\_010097|gb|DQ685983|Mus\_musculus:14:23192318:23192347:Minus



UUCUGCAUGUAAUGUUAACUGUCUUUGAU  
>mmu\_piR\_025910|gb|DQ709437|Mus\_musculus:9:67521862:67521891:Minus  
UACUAUUCGCCAGUGCGGACUGGAGCCAUC  
>mmu\_piR\_028807|gb|DQ713619|Mus\_musculus:12:98801985:98802014:Minus  
UCUGUUUACCACCCAGGAUGUGAGUGCUUC  
>mmu\_piR\_012441|gb|DQ689597|Mus\_musculus:4:93800128:93800157:Minus  
UGAUCAGAAUGGUGUACAUAAAUGUCAGUA  
>mmu\_piR\_022208|gb|DQ704075|Mus\_musculus:6:128412986:128413015:Plus  
UGGGAAGAAAUCAUUCUCUAUGUUGCAAU  
>mmu\_piR\_005279|gb|DQ555698|Mus\_musculus:2:118397764:118397793:Plus  
UGGUCAAGUCUUCAGAGCCUCACUCUGGUC  
>mmu\_piR\_022073|gb|DQ703865|Mus\_musculus:15:74473791:74473820:Plus  
UGAAUAACCAUAACUGCCAUCGAAAUGUG  
>mmu\_piR\_021496|gb|DQ703000|Mus\_musculus:5:113585429:113585458:Plus  
UGAGAACAACAAGCCUAAGGCACACAAGCCC  
>mmu\_piR\_001951|gb|DQ544790|Mus\_musculus:5:113590203:113590232:Plus  
UCUUCUUUGGCAGCAGUUCAGUCCCUUAGC  
>mmu\_piR\_034917|gb|DQ722471|Mus\_musculus:8:96306533:96306562:Minus  
UUACAUCUCCACAGAGUUUAGGUACUGCUU  
>mmu\_piR\_033354|gb|DQ720206|Mus\_musculus:18:35698104:35698133:Plus  
UAAGUAUGCCAGCAUCUCUUGGAAGGAUGA  
>mmu\_piR\_035237|gb|DQ722957|Mus\_musculus:12:98798203:98798232:Minus  
GUUUCAUUGCUUUUGAGCUUGUGGUAAGGC  
>mmu\_piR\_025020|gb|DQ708149|Mus\_musculus:2:92380908:92380937:Plus  
UCCAGAGUCAGAAGCUUGUGUGAGUUAAAU  
>mmu\_piR\_012380|gb|DQ689507|Mus\_musculus:5:150084337:150084366:Minus  
UACAAGUCCUCCUCAGACUAGGAUCAUGUG  
>mmu\_piR\_004918|gb|DQ554398|Mus\_musculus:18:67214940:67214969:Plus  
UGGGAACGGGUCACGAAUCCUUGUGCCU  
>mmu\_piR\_004906|gb|DQ554362|Mus\_musculus:5:115108841:115108870

:Minus  
UGGCUUCUGGAUUAACUGAAAACUGAGUAA  
>mmu\_piR\_030760|gb|DQ716408|Mus\_musculus:2:37396246:37396275:Minus  
UGCCUAAUAGACCUGUUUCAGUUUUGCAG  
>mmu\_piR\_004020|gb|DQ551401|Mus\_musculus:2:92371469:92371498:Plus  
UGCUCUCACCUUUGCCUCCUUUUGACAUG  
>mmu\_piR\_000867|gb|DQ541626|Mus\_musculus:2:92380967:92380996:Plus  
GCCUUUUUGGAUGGUCUCGAUUACUGCAG  
>mmu\_piR\_032017|gb|DQ718177|Mus\_musculus:12:98789358:98789387:Minus  
UCAACUACAGAUGGAUAGUUUAUCAUAGG  
>mmu\_piR\_007944|gb|DQ565681|Mus\_musculus:18:67158443:67158472:Minus  
UAGAACCUUCAUGUGUGUCUGGCCUGAUU  
>mmu\_piR\_037533|gb|DQ726274|Mus\_musculus:4:57454586:57454615:Minus  
UAGCCCUUCCUAUUGAGUAUGCAUCCAAG  
>mmu\_piR\_027521|gb|DQ711786|Mus\_musculus:3:35059496:35059525:Plus  
UGUGAUUUUUGUGUGUAUGAGAUUUGAAUC  
>mmu\_piR\_006284|gb|DQ560806|Mus\_musculus:5:113575152:113575181:Minus  
UUAGAACGGAGAACAAGAGUACCGGGUGAC  
>mmu\_piR\_027707|gb|DQ712047|Mus\_musculus:10:18510041:18510070:Minus  
UAUCAGUGUUUCUGUUGGGGACAACAGC  
>mmu\_piR\_022995|gb|DQ705208|Mus\_musculus:2:92378427:92378456:Plus  
UGCUGUUGUACAAACAAACAUUUCCAGUC  
>mmu\_piR\_026287|gb|DQ710011|Mus\_musculus:7:73686968:73686997:Minus  
UACAGUAUAAACAACACUGCUGUAUGAGAC  
>mmu\_piR\_008204|gb|DQ566586|Mus\_musculus:7:73709383:73709412:Plus  
UAGGAAACAUCUUCAGGACACGUUGGAGAC  
>mmu\_piR\_036672|gb|DQ725031|Mus\_musculus:7:73014340:73014369:Plus  
UGUUAGGCAUGGAUGACAACAUGCAUUUCC  
>mmu\_piR\_029987|gb|DQ715323|Mus\_musculus:13:24914515:24914544:Plus  
UGCUCUAUACCGCCUAGGGAUUCUGCUAGC

>mmu\_piR\_018578|gb|DQ698757|Mus\_musculus:10:62081087:62081116:  
Plus  
UGGGCAACACUCGUGGAACUGGUUCGACCC

>mmu\_piR\_021996|gb|DQ703744|Mus\_musculus:7:73695515:73695544:P  
lus  
UGGAAUUUGUUGUCUGUGUCACGGACUUGC

>mmu\_piR\_004682|gb|DQ553780|Mus\_musculus:8:96309594:96309623:M  
inus  
UGGCACUCCUUCAUCACGUCUACAAGCAAC

>mmu\_piR\_004322|gb|DQ552555|Mus\_musculus:9:67531721:67531750:M  
inus  
UAAAGUGUGUGAAAUGUUUGGACAUGUCUA

>mmu\_piR\_025646|gb|DQ709061|Mus\_musculus:8:26102725:26102754:M  
inus  
UCACAGAAUAUUGCGAUGGAUCCUCUAGCC

>mmu\_piR\_018665|gb|DQ698882|Mus\_musculus:7:69784019:69784048:P  
lus  
UAAAGUAGAAAGAGUGACUGGGUAGAGCCC

>mmu\_piR\_003628|gb|DQ550431|Mus\_musculus:6:85078398:85078427:M  
inus  
UGCCUCCCUGCUGGUAUUUCUCAUCCUCCU

>mmu\_piR\_037065|gb|DQ725598|Mus\_musculus:7:72990666:72990695:P  
lus  
UCUCAUUUUUAUAAGCUGUGGUGGUUCUCC

>mmu\_piR\_010029|gb|DQ685871|Mus\_musculus:7:29846710:29846739:P  
lus  
UCACUAUGUCAUAUAGUUCAGGGUGUACUU

>mmu\_piR\_004644|gb|DQ553692|Mus\_musculus:18:67171525:67171554:  
Minus  
UGGCAAGAGGUGGAUAAGGAAGGUUAGGU

>mmu\_piR\_036056|gb|DQ724160|Mus\_musculus:9:67537600:67537629:P  
lus  
UGUGGACAUUUCUGCCAUCUACAUGCUGU

>mmu\_piR\_030705|gb|DQ716332|Mus\_musculus:6:127771378:127771407  
:Plus  
UCAGAUUUUGAGACGCUUUGACUGUGAAGA

>mmu\_piR\_022728|gb|DQ704837|Mus\_musculus:5:113567390:113567419  
:Minus  
UGACAAAACAAAUCCUCCUUCUGCUAGUCA

>mmu\_piR\_027799|gb|DQ712182|Mus\_musculus:15:59102799:59102828:  
Minus  
UCCACCAAACACAAAACUGCAACAUUCA

>mmu\_piR\_033628|gb|DQ720606|Mus\_musculus:13:53406668:53406697:  
Plus

UGAUUGGAACCCUAUUUCAGUCUCCAUGGU  
>mmu\_piR\_016302|gb|DQ695377|Mus\_musculus:6:128165269:128165298  
:Minus  
UGUACAGCCAAACAAGGUGACUAGCCAUCG  
>mmu\_piR\_027875|gb|DQ712282|Mus\_musculus:1:90097320:90097349:M  
inus  
CAGGCUUAGAACUGAAAAGCGUUUCUCUUG  
>mmu\_piR\_007728|gb|DQ564911|Mus\_musculus:12:98817594:98817623:  
Minus  
UACCCGAACUGUAAGGUUCUUUCAGGGAGA  
>mmu\_piR\_016082|gb|DQ695055|Mus\_musculus:2:92347894:92347923:P  
lus  
UACUAUUGAUACUGUGCGUGUCAGAUGACU  
>mmu\_piR\_013424|gb|DQ691108|Mus\_musculus:12:98825258:98825287:  
Plus  
UGGGACAGUCCUUUGCCUUUACUGAUUCA  
>mmu\_piR\_030257|gb|DQ715709|Mus\_musculus:12:98839978:98840007:  
Plus  
UACAAGUACACUGGCAAACUCCCACUGGGU  
>mmu\_piR\_001008|gb|DQ542064|Mus\_musculus:13:50313589:50313618:  
Plus  
UCCAAUGCCUCAGAUGGUCCUGAUCUGUUG  
>mmu\_piR\_020513|gb|DQ701594|Mus\_musculus:15:74472936:74472965:  
Plus  
UGGAAACACAUGGGUAUUGCACAAGGGCUU  
>mmu\_piR\_019429|gb|DQ699992|Mus\_musculus:6:127770090:127770119  
:Plus  
UGGAAUGCUGGCCCAUCCUGGCCCCUGACA  
>mmu\_piR\_030586|gb|DQ716165|Mus\_musculus:1:100123137:100123166  
:Plus  
UCCGAGUUGGAGACAAAGUCUUGGUCAGAC  
>mmu\_piR\_001135|gb|DQ542473|Mus\_musculus:15:72929697:72929726:  
Minus  
UCCCAACACACAUUCAGUAUACAUGCUC  
>mmu\_piR\_003378|gb|DQ549694|Mus\_musculus:9:67507804:67507833:M  
inus  
UGCCAAGAUUUUCAGCUUGCCUGCCCUGUU  
>mmu\_piR\_037899|gb|DQ726795|Mus\_musculus:14:22943283:22943312:  
Plus  
UGAGAAGAUUUCAGUCCCAACCUCCUC  
>mmu\_piR\_029719|gb|DQ714936|Mus\_musculus:6:92135070:92135099:P  
lus  
UAUAGUUCGAGUCUAUUUAAAUCUCUGUAG  
>mmu\_piR\_021452|gb|DQ702936|Mus\_musculus:7:69777961:69777990:M

inus  
UACUUUUUCCUUUUGCUUGGUCCAGAUAAAG  
>mmu\_piR\_027427|gb|DQ711654|Mus\_musculus:7:52783385:52783414:Plus  
lus  
UAUAGAUAUUGACCUGCUUUCUGUUGCAA  
>mmu\_piR\_020021|gb|DQ700882|Mus\_musculus:18:67187256:67187285:Minus  
Minus  
UAAGUUCAUACUCUGAGUUAGGGCUGAGAC  
>mmu\_piR\_019445|gb|DQ700012|Mus\_musculus:2:150950775:150950804:Minus  
:Minus  
UAACAAUGGGUCUACUCUGUGGAGAAAGGA  
>mmu\_piR\_012296|gb|DQ689388|Mus\_musculus:15:59089526:59089555:Minus  
Minus  
UAUCAGAAAGAGUCAAGGCAGUCUCGCCAG  
>mmu\_piR\_035296|gb|DQ723048|Mus\_musculus:5:150067350:150067379:Minus  
:Minus  
UAAAAAUGGCAACCCAAUCUUCUGAGAGGC  
>mmu\_piR\_014685|gb|DQ692977|Mus\_musculus:8:113014604:113014633:Plus  
:Plus  
UCCACAAUAGUUUGGUAACUGUAUAUGGGA  
>mmu\_piR\_024042|gb|DQ706756|Mus\_musculus:9:54943550:54943579:Minus  
inus  
UGGAAUACUCCUUUGUUGAUGGCUUAGUCC  
>mmu\_piR\_018149|gb|DQ698089|Mus\_musculus:6:127761402:127761431:Minus  
:Minus  
UAAUGAUUGGCUUUGAAAGGUAGACUCAA  
>mmu\_piR\_030917|gb|DQ716635|Mus\_musculus:17:66130117:66130146:Plus  
Plus  
UGAAGUUUAUACAACAGUGAUGUCAGCUACC  
>mmu\_piR\_022305|gb|DQ704221|Mus\_musculus:2:92343018:92343047:Plus  
lus  
AGAGUAAGGAUGUUGGUGUGGCCACGGCU  
>mmu\_piR\_002735|gb|DQ547514|Mus\_musculus:10:86010555:86010584:Minus  
Minus  
UGAGAAACAUUUCAGUGUCUUAGAUUAUC  
>mmu\_piR\_006737|gb|DQ561866|Mus\_musculus:4:57455411:57455440:Minus  
inus  
UUGCCACCGAGAUUCGAGUGAAGAAUGAGA  
>mmu\_piR\_024400|gb|DQ707267|Mus\_musculus:9:67508107:67508136:Minus  
inus  
UAAUUAUCCCCUACUGAAAUAACAUUUC  
>mmu\_piR\_003907|gb|DQ551158|Mus\_musculus:5:117544118:117544147:Minus  
:Minus  
UGCUGCCAGCCGUCACGAUUCUGGAUAGUC

>mmu\_piR\_015012 | gb | DQ693475 | Mus\_musculus:6:128412874:128412903  
:Plus  
UGACUCUUGUCGACAUCAUCUGCUAAGAGC

>mmu\_piR\_030029 | gb | DQ715381 | Mus\_musculus:17:27042486:27042515:  
Minus  
UGCUCAGCUUUGAAUUCUGGCAGGAAAAAA

>mmu\_piR\_035943 | gb | DQ723996 | Mus\_musculus:2:92385527:92385556:P  
lus  
UACUUGCCUAUCCUGUUGCUGAAUCCAUG

>mmu\_piR\_027247 | gb | DQ711393 | Mus\_musculus:17:27048004:27048033:  
Minus  
UGCGGAUGAACAUUAAGCUUGCUCUUCAGGU

>mmu\_piR\_000403 | gb | DQ540496 | Mus\_musculus:17:27047773:27047802:  
Minus  
CACCAACCAAGAUCUUCAGUUUAUUCGUG

>mmu\_piR\_022131 | gb | DQ703949 | Mus\_musculus:18:67182974:67183003:  
Minus  
AAGAAAGACGCUUUUGGCAGCAGGCAUUUC

>mmu\_piR\_033963 | gb | DQ721101 | Mus\_musculus:14:23180186:23180215:  
Minus  
UGCAUCCUCGAGAUGAAACCUACUUGAUC

>mmu\_piR\_011898 | gb | DQ688747 | Mus\_musculus:8:95083378:95083407:P  
lus  
CACAUUCAAUACAUUUCUAACGGGCCCGUC

>mmu\_piR\_032590 | gb | DQ719026 | Mus\_musculus:5:113590750:113590779  
:Plus  
UAAUUUCCUUAUUUGCUGUCCUCCCCCCC

>mmu\_piR\_017264 | gb | DQ696798 | Mus\_musculus:4:112963945:112963974  
:Minus  
UGAUUGCUGAUCUGCAUCCUGCGUAGCUU

>mmu\_piR\_013358 | gb | DQ691003 | Mus\_musculus:14:22924087:22924116:  
Plus  
AGGAAGAUAAAGAGAAUCCACAACCACCAUC

>mmu\_piR\_026837 | gb | DQ710794 | Mus\_musculus:7:73667563:73667592:M  
inus  
UAGUGCCAUCCUACAGCUAUUUGUCAGAGC

>mmu\_piR\_019863 | gb | DQ700638 | Mus\_musculus:3:108326821:108326850  
:Minus  
UAGACAAGUCCAUAUCUAGGACCUCAGU

>mmu\_piR\_023388 | gb | DQ705779 | Mus\_musculus:3:109088575:109088604  
:Plus  
UAGUUUGAGAGUUUAACACAAAUUGGGUC

>mmu\_piR\_012017 | gb | DQ688941 | Mus\_musculus:9:71092942:71092971:P  
lus

UGUGUGUGUGAUCAGUGGUUCUCAACCUGU  
>mmu\_piR\_006780|gb|DQ561945|Mus\_musculus:10:127101184:127101213:Plus  
UUGCUUGGUUCUUUCAUUGUGAUCUUCACC  
>mmu\_piR\_001210|gb|DQ542709|Mus\_musculus:5:115109251:115109280:Minus  
UCCCCUAGGUUCUCAGACCCUUCUGGAGUC  
>mmu\_piR\_013532|gb|DQ691279|Mus\_musculus:7:69795812:69795841:Plus  
UACUUUGGGAUUCCUGAUUGCCAAACAA  
>mmu\_piR\_029682|gb|DQ714886|Mus\_musculus:17:66088206:66088235:Minus  
UCCUGAGAGCAAUCUUAUCAUGGCUUCU  
>mmu\_piR\_003457|gb|DQ549918|Mus\_musculus:2:92348043:92348072:Plus  
UGCCAGAUGCCUUCUUCUCCUUCUUGGU  
>mmu\_piR\_018691|gb|DQ698919|Mus\_musculus:5:113576431:113576460:Minus  
UCCGUGGUUCUCUACAUGGAUGGUCUUC  
>mmu\_piR\_013890|gb|DQ691809|Mus\_musculus:7:72992769:72992798:Plus  
UAAUUCUACAUAAGUGAAAGGGAUGUUUA  
>mmu\_piR\_003308|gb|DQ549440|Mus\_musculus:6:127774939:127774968:Plus  
UGCAUCUGGAAGUGUCCUGUGCCCAACCC  
>mmu\_piR\_012739|gb|DQ690054|Mus\_musculus:12:98804739:98804768:Minus  
UGUUAUUGCCAUUUUUGUCAGGUCCAUGAU  
>mmu\_piR\_026557|gb|DQ710397|Mus\_musculus:4:149403639:149403668:Minus  
UAGUAGGAAAUGACUACAUGUCGGGUGGU  
>mmu\_piR\_018273|gb|DQ698296|Mus\_musculus:10:75282942:75282971:Plus  
UAAUCUAGGAUGACACAAUGACUCAAAGU  
>mmu\_piR\_014578|gb|DQ692831|Mus\_musculus:7:72996096:72996125:Plus  
UAGGGAUUUCUGAUAGUAUCAUUCUGACCC  
>mmu\_piR\_023552|gb|DQ706026|Mus\_musculus:4:93814839:93814868:Minus  
UCCUCAUGUGGUCCAAGUUAGAUAUUUUC  
>mmu\_piR\_006485|gb|DQ561232|Mus\_musculus:13:50578916:50578945:Minus  
UCCAGCUCAUAGGGAUGCCUGUAUCCUUC  
>mmu\_piR\_012981|gb|DQ690454|Mus\_musculus:17:27076213:27076242:

Plus  
UAAGCUGUAGAUCAAAGAAAGAUUAUGUCAU  
>mmu\_piR\_020947|gb|DQ702232|Mus\_musculus:12:98807921:98807950:  
Minus  
UGCCAAGUUGAAUAGUUGUUUACUUAUAGG  
>mmu\_piR\_014696|gb|DQ692992|Mus\_musculus:9:67528906:67528935:M  
inus  
UCCAUAAGGUAAGAAUGCAAUGUGAUAGC  
>mmu\_piR\_008768|gb|DQ568405|Mus\_musculus:2:150848171:150848200  
:Plus  
UAUGUAUCAUGAAGCCUGGUGAUCUUUAGU  
>mmu\_piR\_001661|gb|DQ544104|Mus\_musculus:9:67513839:67513868:M  
inus  
UCUACUCCCUGUACACUGACCUUCUGAUUC  
>mmu\_piR\_011924|gb|DQ688791|Mus\_musculus:5:113579546:113579575  
:Minus  
UCCUGUGCAUCGAGAUUAUCUUUUCUUGGU  
>mmu\_piR\_000580|gb|DQ540862|Mus\_musculus:11:106317126:10631715  
5:Plus  
CCGGGUGAUGCGAAUCGUAUCUGAGCCGA  
>mmu\_piR\_003832|gb|DQ550954|Mus\_musculus:11:120805600:12080562  
9:Minus  
UGCUAUGUGCCACAUGAGUGCCUUUGAAUC  
>mmu\_piR\_035247|gb|DQ722971|Mus\_musculus:7:73687574:73687603:M  
inus  
UCAAGCAAAGCAGAGCCACAGAAUGUAGA  
>mmu\_piR\_031501|gb|DQ717469|Mus\_musculus:7:125120998:125121027  
:Minus  
UCAUUAUGCCUUUUCUCCCUACAGAUUCU  
>mmu\_piR\_006354|gb|DQ560963|Mus\_musculus:5:150059045:150059074  
:Minus  
UCAAAGCUCACCCUGUCACAGGUGCUACC  
>mmu\_piR\_007040|gb|DQ562688|Mus\_musculus:18:67183024:67183053:  
Minus  
UUUCUCUCAGGAUAGGUAUAAGCAAAAAAU  
>mmu\_piR\_021911|gb|DQ703627|Mus\_musculus:6:127767197:127767226  
:Plus  
UGACCACCCAGCAGAGUGACUGUGCCAGAG  
>mmu\_piR\_030198|gb|DQ715628|Mus\_musculus:4:93814244:93814273:M  
inus  
CCUGAUACUGUUGUGUGGAUAAGUUUCUCC  
>mmu\_piR\_023435|gb|DQ705850|Mus\_musculus:14:22938005:22938034:  
Plus  
GGAAAAAGAAUAGCCCCACGCAUCCCUGAC



>mmu\_piR\_025716|gb|DQ709163|Mus\_musculus:13:24913613:24913642:  
Plus  
UCAACUGAAUCUUUCUGAACUCAUCAGCAA  
>mmu\_piR\_032381|gb|DQ718719|Mus\_musculus:7:73665255:73665284:M  
inus  
UCAUAAGAAAGAACAACUGUGUUGGGG  
>mmu\_piR\_011230|gb|DQ687734|Mus\_musculus:9:3184929:3184958:Min  
us  
GAAAAGGUUGAAUUUCUUGUGAUUGCUA  
>mmu\_piR\_027687|gb|DQ712017|Mus\_musculus:17:66117339:66117368:  
Plus  
UAGGUUGAUUGCAAGACCAAACUCAAUGG  
>mmu\_piR\_035595|gb|DQ723468|Mus\_musculus:4:57455116:57455145:M  
inus  
UCAGAGUUACAUUGGAGAGCCUCGUUCU  
>mmu\_piR\_037237|gb|DQ725840|Mus\_musculus:2:151013100:151013129  
:Plus  
GGCCUGAUGACUUGAAACACCCUGUAAGGA  
>mmu\_piR\_031300|gb|DQ717174|Mus\_musculus:9:54039549:54039578:M  
inus  
UUUGUGUAUAUUUGUACAAAUGGCAAUGG  
>mmu\_piR\_035861|gb|DQ723878|Mus\_musculus:17:27086721:27086750:  
Plus  
UGCACAGUGAGAAUCGUGAAGGGGACCAGG  
>mmu\_piR\_033537|gb|DQ720480|Mus\_musculus:6:87957263:87957292:M  
inus  
UACCACUCAGUGUUAUCAAGACCAAGUCGC  
>mmu\_piR\_001160|gb|DQ542545|Mus\_musculus:4:124444265:124444294  
:Plus  
UCCCACUUCAGUAAAACCUUCUAGAGACA  
>mmu\_piR\_020690|gb|DQ701867|Mus\_musculus:4:123341906:123341935  
:Minus  
UAGAUUUGGCAAAACAUGUUCCUACACUG  
>mmu\_piR\_007508|gb|DQ564151|Mus\_musculus:7:125122162:125122191  
:Minus  
UACAACUCUUCAGGGACACUGGUGGUGUGG  
>mmu\_piR\_016585|gb|DQ695801|Mus\_musculus:12:98817486:98817515:  
Minus  
UCCUUUGGCUAUUUUUGUGAACCCUGCAAU  
>mmu\_piR\_001643|gb|DQ544072|Mus\_musculus:10:75292808:75292837:  
Plus  
UCUAAGUGGCCUAUGAGAAAGCAUGUCCUC  
>mmu\_piR\_014512|gb|DQ692738|Mus\_musculus:17:66109525:66109554:  
Minus

UGGAUGGAAUUAGAAAGUAUCACCCCAAGU  
>mmu\_piR\_024871|gb|DQ707936|Mus\_musculus:2:92390532:92390561:Plus  
UUUUCUUUAGAGAGUUUGGAGUCAGCAUCU  
>mmu\_piR\_005799|gb|DQ557371|Mus\_musculus:9:54022411:54022440:Minus  
UGUGAAGUCACCAGCAUUGGGCUUCCAGGG  
>mmu\_piR\_011871|gb|DQ688705|Mus\_musculus:12:98789492:98789521:Minus  
UGAGCUUUCGACCCUAGUGCCCAGAGACUC  
>mmu\_piR\_024171|gb|DQ706951|Mus\_musculus:6:127754486:127754515:Minus  
UGAAAUGAAGCAGUCCAACUUGGCAAUG  
>mmu\_piR\_027085|gb|DQ711143|Mus\_musculus:5:145421761:145421790:Plus  
UACUCAAUUGAUGGCACUGCCUUGAGACC  
>mmu\_piR\_027456|gb|DQ711693|Mus\_musculus:17:25010925:25010954:Plus  
UAUAAAGACCAUCCUAAACCUGGAGCAUUC  
>mmu\_piR\_001153|gb|DQ542533|Mus\_musculus:7:69802409:69802438:Plus  
UCCCACAGUUGUGUGAUUACCUCUGCCUGC  
>mmu\_piR\_004455|gb|DQ552995|Mus\_musculus:13:50923312:50923341:Minus  
UGGAAUCUUGGGUGCAAGUGCUGUGAAGGU  
>mmu\_piR\_028549|gb|DQ713248|Mus\_musculus:17:27069813:27069842:Plus  
UGCGUUGAGCUCAUUAUCCAGAAAAGCACA  
>mmu\_piR\_015527|gb|DQ694233|Mus\_musculus:1:164315707:164315736:Plus  
UGGAUAUGCUAUAUGAUAGCUGAGUCAGUC  
>mmu\_piR\_023669|gb|DQ706220|Mus\_musculus:17:27027895:27027924:Minus  
UGACUAAGAUGAGAGCCACGGUGGGGUCA  
>mmu\_piR\_021007|gb|DQ702307|Mus\_musculus:12:98835059:98835088:Plus  
UGAAGAAAAAUGCAUGAUCUGCCUCCAAC  
>mmu\_piR\_005019|gb|DQ554846|Mus\_musculus:14:22924524:22924553:Plus  
UGGGAUGUCUCUGAGGUUAUAUAUCCUA  
>mmu\_piR\_032723|gb|DQ719220|Mus\_musculus:7:73012432:73012461:Plus  
UUAAUUAUUGUGAUUGAAAUGUUGGUCCC  
>mmu\_piR\_033710|gb|DQ720729|Mus\_musculus:7:125120133:125120162

:Minus  
UCCAUAUCUUUGCUACCAUACAGAUGGA  
>mmu\_piR\_028526|gb|DQ713215|Mus\_musculus:5:113589181:113589210  
:Plus  
GCUCUGCAAAGGGCCAGGACGCUCGCUCGU  
>mmu\_piR\_024654|gb|DQ707648|Mus\_musculus:18:67189087:67189116:  
Minus  
UGAGAUUUGUCACUGUGCUCAGAAAGAUUU  
>mmu\_piR\_002170|gb|DQ545527|Mus\_musculus:7:69790616:69790645:P  
lus  
UGAACUAUUCACCCUACAAAGAGUCCAAGA  
>mmu\_piR\_035506|gb|DQ723335|Mus\_musculus:13:51156914:51156943:  
Minus  
UAAAACCAUGUGUUAUGACAGGCGCCCGU  
>mmu\_piR\_016640|gb|DQ695884|Mus\_musculus:12:98810458:98810487:  
Minus  
UCCAUGAGUUUGGCUUUAUACAACCUUGUA  
>mmu\_piR\_032291|gb|DQ718585|Mus\_musculus:7:72995193:72995222:P  
lus  
UGAUGACCAUAUCCUCCUUAUUUGGAGAC  
>mmu\_piR\_012365|gb|DQ689484|Mus\_musculus:17:66117004:66117033:  
Plus  
UGGAAUAGUCUUGGAAUUUUGCUUACUCAU  
>mmu\_piR\_002566|gb|DQ546926|Mus\_musculus:10:75302354:75302383:  
Plus  
UGAGAAAUCCUAGGUAGCAGAAGUAGGU  
>mmu\_piR\_002612|gb|DQ547096|Mus\_musculus:14:22925076:22925105:  
Plus  
UGAGAGAAAGCAUCUGGGGAGAAGCCGAUC  
>mmu\_piR\_008052|gb|DQ566059|Mus\_musculus:4:93803030:93803059:M  
inus  
UAGAUUUGGUAGAGGUUUUCAGGACUGG  
>mmu\_piR\_015388|gb|DQ694012|Mus\_musculus:2:92343986:92344015:P  
lus  
UUUUUACAGAGAUGUAUGAAGUUGUGUCUU  
>mmu\_piR\_019295|gb|DQ699792|Mus\_musculus:12:98800268:98800297:  
Minus  
UUAAGCUAAGCCUUCUGGUAAGUUCAGAG  
>mmu\_piR\_001101|gb|DQ542346|Mus\_musculus:16:14390455:14390484:  
Minus  
UCCAGUCGAGCUGAGGUUGUGAACCCCGGU  
>mmu\_piR\_013075|gb|DQ690586|Mus\_musculus:7:73018943:73018972:P  
lus  
UCUUAGCAAACUGGUAUGUUAAGUGCGCCA

>mmu\_piR\_023539|gb|DQ706004|Mus\_musculus:12:98839575:98839604:  
Plus  
UGACUCUCAACUCUUGGUUAUUUGAAUGGU  
>mmu\_piR\_010245|gb|DQ686198|Mus\_musculus:12:98819021:98819050:  
Minus  
UGAUUAUAAGAAGGAGCCUGUGCACCCUC  
>mmu\_piR\_029245|gb|DQ714273|Mus\_musculus:4:93776060:93776089:M  
inus  
UAGAAGGAUACAUAGUAGUUCUAUCUUGGA  
>mmu\_piR\_025655|gb|DQ709074|Mus\_musculus:15:78486188:78486217:  
Minus  
UACGCACCAUGUUUCUUAACUUUAUCCC  
>mmu\_piR\_023262|gb|DQ705587|Mus\_musculus:12:98823238:98823267:  
Plus  
UAAGUUUGAAACCACUUUGCGUGUCACUGC  
>mmu\_piR\_022147|gb|DQ703974|Mus\_musculus:10:75300780:75300809:  
Plus  
UGGGAGACAGCAGUGACACUGCCAGGUACC  
>mmu\_piR\_006192|gb|DQ558476|Mus\_musculus:17:27078042:27078071:  
Plus  
UGUUUGUUUGUUGUACAGGUCCUGGGCAUC  
>mmu\_piR\_035874|gb|DQ723899|Mus\_musculus:7:125121028:125121057  
:Minus  
UGGUAGAUUAUAUUGUAAGUAGCCACGAUA  
>mmu\_piR\_006741|gb|DQ561872|Mus\_musculus:17:27046067:27046096:  
Minus  
UUGCCAGUGACCACUUUGUGAUCUCUUGUA  
>mmu\_piR\_022636|gb|DQ704710|Mus\_musculus:2:150954518:150954547  
:Minus  
UGUAUAUACCAGGCACUGGCAUAGGCCUC  
>mmu\_piR\_012233|gb|DQ689294|Mus\_musculus:12:98847721:98847750:  
Plus  
UGUUUUUGUAAUUCUAACAUGGACUUGUCA  
>mmu\_piR\_020497|gb|DQ701569|Mus\_musculus:9:52838511:52838540:P  
lus  
GCUCAACAUGACUCACCUGCAAUGCUGCCU  
>mmu\_piR\_024876|gb|DQ707944|Mus\_musculus:15:59082578:59082607:  
Minus  
UGAUGUAAAUGUAGAGUAGAAGCCGUGUA  
>mmu\_piR\_036601|gb|DQ724924|Mus\_musculus:15:83184017:83184046:  
Minus  
UCCCCAUUUCACAGAUGAGGAAACUGAAGC  
>mmu\_piR\_029530|gb|DQ714670|Mus\_musculus:17:27034752:27034781:  
Minus

UAGAGCUUCAGAUGAUUAUCUUUGCAACUGC  
>mmu\_piR\_007246 | gb | DQ563274 | Mus\_musculus:6:127772440:127772469  
:Plus  
UAAGAUCAGGCCAGAUGGAUUGGAUUAGGU  
>mmu\_piR\_015674 | gb | DQ694444 | Mus\_musculus:1:93235144:93235173:M  
inus  
UGAUACUUCCAAGCAUCAGUGUGUCAGAC  
>mmu\_piR\_019651 | gb | DQ700319 | Mus\_musculus:17:79240680:79240709:  
Minus  
UGCGCUGAGCAAGAUCUCCAAGACCCUGUC  
>mmu\_piR\_009783 | gb | DQ685471 | Mus\_musculus:12:98815721:98815750:  
Minus  
UCUGCCAAGGAUUAGGGUUGACGACUCUGU  
>mmu\_piR\_020222 | gb | DQ701174 | Mus\_musculus:13:53409405:53409434:  
Plus  
UGAGAGUCAAGUGGCUUGUCCACCAGGAGA  
>mmu\_piR\_003781 | gb | DQ550807 | Mus\_musculus:2:92351218:92351247:P  
lus  
UGC UAAACUGGGAGCUCUUUGGGGUCAGG  
>mmu\_piR\_015237 | gb | DQ693795 | Mus\_musculus:14:18434576:18434605:  
Minus  
UCCGAAGUUGGGCAGAGCAAUGCUUGGAGG  
>mmu\_piR\_037515 | gb | DQ726248 | Mus\_musculus:2:92397390:92397419:P  
lus  
UGCAAGCUUGUAUUCUUGUCAGUGUCCCAG  
>mmu\_piR\_023311 | gb | DQ705660 | Mus\_musculus:13:24914127:24914156:  
Plus  
UAAAUUUGAAGACAGCCGGUUUCCCCGGG  
>mmu\_piR\_033950 | gb | DQ721082 | Mus\_musculus:18:64617683:64617712:  
Plus  
UAAAAUGUACUUCAUAUGAAUUCUAUUUAA  
>mmu\_piR\_022344 | gb | DQ704287 | Mus\_musculus:17:27046563:27046592:  
Minus  
UAAACUCAGUUCUUCACGCUGGCACCCAAG  
>mmu\_piR\_003228 | gb | DQ549208 | Mus\_musculus:5:150094031:150094060  
:Minus  
UGCAGAGAUCGGGUUUUAAAUCUUGAAAGC  
>mmu\_piR\_009763 | gb | DQ685432 | Mus\_musculus:11:72896570:72896599:  
Plus  
UAUAGUAUUUAAUACUGUAUUGCUCUACAG  
>mmu\_piR\_009255 | gb | DQ569783 | Mus\_musculus:10:62081779:62081808:  
Plus  
UCAUGUCUCAACCAUGCUGGCCUAGAAUUC  
>mmu\_piR\_018786 | gb | DQ699067 | Mus\_musculus:2:118530251:118530280

:Plus  
UAGGAGUUCAAAACCAGUCUGGGUCAUGAG  
>mmu\_piR\_003247|gb|DQ549245|Mus\_musculus:17:27046834:27046863:  
Minus  
UGCAGCAGCCCUCUUCAUUGACCUGAACCC  
>mmu\_piR\_015864|gb|DQ694736|Mus\_musculus:5:113562214:113562243  
:Minus  
UAAUCAGCCACAUAUUUCAACAUAUCCGGG  
>mmu\_piR\_023841|gb|DQ706465|Mus\_musculus:9:67536108:67536137:P  
lus  
UAAAGAAUUUGGCAUCUAAUUUAUGGGUCC  
>mmu\_piR\_011712|gb|DQ688458|Mus\_musculus:6:128151231:128151260  
:Minus  
UCCUACUUUAUCCAUAUAGCUUGCUGCCUA  
>mmu\_piR\_020694|gb|DQ701872|Mus\_musculus:17:66115128:66115157:  
Plus  
UCCUAAGUGAUCUUCGCAUAUCACUGGAAC  
>mmu\_piR\_029317|gb|DQ714380|Mus\_musculus:2:150944089:150944118  
:Minus  
UUCAGCACCCUAUGUGUUAUCCUACAGAA  
>mmu\_piR\_001194|gb|DQ542648|Mus\_musculus:15:83184371:83184400:  
Minus  
UCCCAUGCUCACCCUGUGUUGCCAGACAGC  
>mmu\_piR\_038131|gb|DQ727136|Mus\_musculus:17:27035924:27035953:  
Minus  
UCCAUGGUGAUUUUAAGCUCAGUCAAUA  
>mmu\_piR\_016380|gb|DQ695491|Mus\_musculus:4:45419865:45419894:M  
inus  
UGAGAUAGCCGCGAUCUAAACUUUCUGUUC  
>mmu\_piR\_007725|gb|DQ564901|Mus\_musculus:6:85080169:85080198:M  
inus  
UACCCAGGUUGCAAAGGCAUUAUACCUCC  
>mmu\_piR\_037210|gb|DQ725804|Mus\_musculus:9:67528220:67528249:M  
inus  
UGCAAGCCUGCUACGGGCAUUUGUAAUGAG  
>mmu\_piR\_015073|gb|DQ693558|Mus\_musculus:9:67568764:67568793:P  
lus  
UGGAAGGAUAGAAAGGCAGGGUCAUCCUCC  
>mmu\_piR\_001500|gb|DQ543538|Mus\_musculus:18:67170969:67170998:  
Minus  
UCCUUGGAGUGCCUCGCCACAAAGCAGAGG  
>mmu\_piR\_027865|gb|DQ712269|Mus\_musculus:3:113223181:113223210  
:Minus  
UAAAAUUGGAUGUCUAGGAUAAUGAUUGUC

>mmu\_piR\_017227|gb|DQ696747|Mus\_musculus:5:102073739:102073768:  
:Minus  
UGUAUAAAGGUGGUAGAAACUUAUUUUUUGC  
>mmu\_piR\_013156|gb|DQ690714|Mus\_musculus:2:92348396:92348425:P  
lus  
UGCCAUCGCUGGUGAAACAGGUACCCUAAC  
>mmu\_piR\_026990|gb|DQ710995|Mus\_musculus:5:113576746:113576775:  
:Minus  
UAGCUAAGCAAGCAGGCAGACAUUCUGCUC  
>mmu\_piR\_013728|gb|DQ691574|Mus\_musculus:4:41997542:41997571:M  
inus  
UGAGAUGCUCACAUUGGGUAAGCUACUGCU  
>mmu\_piR\_033349|gb|DQ720196|Mus\_musculus:17:27037823:27037852:  
Minus  
ACGGCACGGGCCUGUGAUCACAGUGGAUGU  
>mmu\_piR\_024614|gb|DQ707585|Mus\_musculus:2:92363171:92363200:P  
lus  
UCCUAAGAAGAAUAAGCAUAAGAGGAAGAA  
>mmu\_piR\_037083|gb|DQ725621|Mus\_musculus:15:59093352:59093381:  
Minus  
UCACACAAUUUAGAUAGCAAUGCCUCCAA  
>mmu\_piR\_000996|gb|DQ541998|Mus\_musculus:15:73000819:73000848:  
Minus  
UCCAAGGUGAGGUAGGGAAGAUGCUGUCCC  
>mmu\_piR\_020835|gb|DQ702070|Mus\_musculus:12:98848185:98848214:  
Plus  
UGUAACAACCAUAUCUAUGCCACACACUUC  
>mmu\_piR\_020176|gb|DQ701103|Mus\_musculus:4:93823399:93823428:M  
inus  
UGAACUUUCUGUUGGUCAAGUCAAAUUGUC  
>mmu\_piR\_004482|gb|DQ553117|Mus\_musculus:12:98789030:98789059:  
Minus  
UGGACAGGUAUGCAACGUAUCUAAAUGCU  
>mmu\_piR\_032423|gb|DQ718781|Mus\_musculus:14:22940184:22940213:  
Plus  
UCAAGAAGAGGAGACCUACCGAGAGCACA  
>mmu\_piR\_029793|gb|DQ715031|Mus\_musculus:5:113571236:113571265:  
:Minus  
UGAAUCCACAGCAUUGUGCCCUCUAGGCUA  
>mmu\_piR\_007677|gb|DQ564756|Mus\_musculus:14:22941914:22941943:  
Plus  
UACCACAUGCUGUCACAAUUACAACAAUC  
>mmu\_piR\_026347|gb|DQ710099|Mus\_musculus:4:93782561:93782590:M  
inus

UGCUCAGUCAGCUUUCUCUACGUUUUAUAUA  
>mmu\_piR\_035825 | gb | DQ723829 | Mus\_musculus:7:69806665:69806694:Plus  
UGGGAAGUACAGAAAUUCCUGUAGAGAC  
>mmu\_piR\_006674 | gb | DQ561723 | Mus\_musculus:12:98817198:98817227:Minus  
UUGACCACAGAGUCAGGAAAAGCUAGGUGU  
>mmu\_piR\_030525 | gb | DQ716082 | Mus\_musculus:5:102073960:102073989:Minus  
UGCGGCCUGCAUUCUUUUUCUAAGUACCUC  
>mmu\_piR\_004507 | gb | DQ553208 | Mus\_musculus:9:67539024:67539053:Plus  
UGGACUUCGGGAGUCGUUCUUCUGCCUCUA  
>mmu\_piR\_013227 | gb | DQ690805 | Mus\_musculus:2:150845485:150845514:Plus  
UCAAUUCAACUUCAGACAGUGGUUCUGUAC  
>mmu\_piR\_020894 | gb | DQ702156 | Mus\_musculus:7:73688634:73688663:Minus  
UACAAGACUGUCAACUAGUCAUGGGAACA  
>mmu\_piR\_022366 | gb | DQ704319 | Mus\_musculus:15:74464427:74464456:Plus  
UGGCAGGAAUCCUGAUGAACAAGUUUGACU  
>mmu\_piR\_010077 | gb | DQ685945 | Mus\_musculus:18:67172427:67172456:Minus  
UCUGAAGAUUUUGAGAGUUCAGAGACCAC  
>mmu\_piR\_032762 | gb | DQ719281 | Mus\_musculus:8:113894082:113894111:Minus  
UAAGUGAGUACUGUAGCUAAAAGUUUCUGA  
>mmu\_piR\_028204 | gb | DQ712770 | Mus\_musculus:5:113591799:113591828:Plus  
UUGAUUUUCUAGCUACGGUUUGCCUAUG  
>mmu\_piR\_002254 | gb | DQ545849 | Mus\_musculus:2:92386899:92386928:Plus  
UGAAGGUGUUCUGUCAACUUGAAUAAACUA  
>mmu\_piR\_005338 | gb | DQ555820 | Mus\_musculus:1:93233490:93233519:Minus  
UGGUGAACCUCAACCUCUGAUGUGCUCUGU  
>mmu\_piR\_004796 | gb | DQ554091 | Mus\_musculus:6:127772845:127772874:Plus  
UGGCCUCAUCCACAUGUUACUAAUGCCUGA  
>mmu\_piR\_013769 | gb | DQ691631 | Mus\_musculus:10:127103025:127103054:Plus  
UACAAGUGUGUCUAAAUGUUUGUCUUGUA  
>mmu\_piR\_002479 | gb | DQ546670 | Mus\_musculus:6:127801805:127801834



:Plus  
UGACGAGUUGAAACCGGUGAACCUAUCAGG  
>mmu\_piR\_031807|gb|DQ717884|Mus\_musculus:9:67518767:67518796:Minus  
ACGAGGUUAGAUUGUUUCCAGUAGCCAGU  
>mmu\_piR\_024168|gb|DQ706948|Mus\_musculus:19:37322856:37322885:Minus  
UACAAAUGGUGGCGAUUUGUGCCGAUUGGC  
>mmu\_piR\_029843|gb|DQ715104|Mus\_musculus:9:116659711:116659740:Plus  
UACCUUGAAGCUCAUGGGUCGCCUAGCCUG  
>mmu\_piR\_015607|gb|DQ694347|Mus\_musculus:5:150059978:150060007:Minus  
UACAAAUCGGCGUGUUCUAUCUUGACAAGU  
>mmu\_piR\_021683|gb|DQ703273|Mus\_musculus:6:127774038:127774067:Plus  
UGGGUUUUUGUAAUAGGUCCCUUCUUGAUC  
>mmu\_piR\_035364|gb|DQ723141|Mus\_musculus:5:144014339:144014368:Plus  
UAAUCUCACUUGGAACCUCAAGUUAGGUA  
>mmu\_piR\_021843|gb|DQ703520|Mus\_musculus:8:113012557:113012586:Plus  
UACCUAAAGGUUUGGAAGGCUGUGAAGCGC  
>mmu\_piR\_005460|gb|DQ556243|Mus\_musculus:10:94104396:94104425:Minus  
UGGUUCAGGCAUUCUUUAAGGAACUAAGUC  
>mmu\_piR\_028945|gb|DQ713819|Mus\_musculus:7:73019020:73019049:Plus  
UGCUCACUAAUAAGGAAUAGUCAAAAAAG  
>mmu\_piR\_032115|gb|DQ718323|Mus\_musculus:12:98825658:98825687:Plus  
UGGCAGCCCACUCAUCCAUAAGAAAUAAA  
>mmu\_piR\_006397|gb|DQ561051|Mus\_musculus:15:74469105:74469134:Plus  
UUCACAGAAAGGGAACCUUCAGGGACCAGG  
>mmu\_piR\_017074|gb|DQ696510|Mus\_musculus:7:69807226:69807255:Plus  
UCUUAUUUCCUUCUACUACGAUUGUGGAA  
>mmu\_piR\_016248|gb|DQ695299|Mus\_musculus:4:93801343:93801372:Minus  
UAGUAAAGUGGAAGUUUAUAGAUCUCCUCC  
>mmu\_piR\_005068|gb|DQ554994|Mus\_musculus:18:67185877:67185906:Minus  
UGGGCCUGCAAUGAACUGAUCUCUACUUA

>mmu\_piR\_030931|gb|DQ716656|Mus\_musculus:7:73688016:73688045:Plus  
CAUGCGAUGUGUUGCAGAGACGUACUACAA

>mmu\_piR\_030239|gb|DQ715679|Mus\_musculus:8:96305698:96305727:Minus  
GAAACAAAUGAAACCAAGGGUCAGGACAAA

>mmu\_piR\_016063|gb|DQ695027|Mus\_musculus:13:52135021:52135050:Plus  
UGUAAAGACGCACCACGCAGAUGAUGAUAC

>mmu\_piR\_021717|gb|DQ703328|Mus\_musculus:12:98809236:98809265:Minus  
UGUACAAUGCCAUGGUCUGCCACCAGCAGA

>mmu\_piR\_007476|gb|DQ564019|Mus\_musculus:5:113591070:113591099:Plus  
UAAUUUGGGUCUCUGUUUGCCAUGUUUCUA

>mmu\_piR\_009577|gb|DQ685145|Mus\_musculus:5:28748461:28748490:Plus  
UGUUAGAUGCCUACUUGACCUUCCUAGGA

>mmu\_piR\_025541|gb|DQ708896|Mus\_musculus:9:54025174:54025203:Minus  
UGACACAAACUCACAUGUGAAAAAAAUGGU

>mmu\_piR\_021171|gb|DQ702542|Mus\_musculus:8:95079388:95079417:Plus  
UACAGUUUAACUGUUUCUGUUGCGCCUC

>mmu\_piR\_021695|gb|DQ703290|Mus\_musculus:2:92349363:92349392:Plus  
UAGAUCUCAGAGCAUACAGCACUUUCAGGU

>mmu\_piR\_019141|gb|DQ699568|Mus\_musculus:15:74470225:74470254:Plus  
UACUCACAGGGAUUCAGUGUUCUUAACAGG

>mmu\_piR\_022734|gb|DQ704845|Mus\_musculus:9:67554034:67554063:Plus  
CACAAAUGCAGAGCAUGAAUCCCAUAGAA

>mmu\_piR\_030115|gb|DQ715503|Mus\_musculus:6:103123049:103123078:Minus  
UCCUAUCUCAGUUGUAAACACUGCCUGGCU

>mmu\_piR\_004427|gb|DQ552920|Mus\_musculus:15:103020853:103020882:Minus  
UGGAAGUACUUAGUGACCUUGGUGAGUUUC

>mmu\_piR\_007532|gb|DQ564267|Mus\_musculus:10:86011991:86012020:Minus  
UACAAUGAGGGUUCAGUGUGAUUUUCUGC

>mmu\_piR\_017631|gb|DQ697341|Mus\_musculus:6:81864744:81864773:Minus

UAGACAAAGCUGUUUAAAGUUCUAAUAUC  
>mmu\_piR\_036208|gb|DQ724371|Mus\_musculus:4:93801610:93801639:Minus  
UAGGGGAUAGUCUCAUAGGGAACUUUCUAU  
>mmu\_piR\_023258|gb|DQ705583|Mus\_musculus:7:73710861:73710890:Plus  
UCCAAGACCAUGGAAUAGUGAGCGCUACUC  
>mmu\_piR\_003968|gb|DQ551297|Mus\_musculus:18:67163563:67163592:Minus  
UGCUGUUUUACAGGGACUAUUAUUGUUGG  
>mmu\_piR\_027625|gb|DQ711929|Mus\_musculus:7:72979843:72979872:Plus  
UACAAAGGUUAAAUUGUGGUAUGGCCAGUG  
>mmu\_piR\_010903|gb|DQ687224|Mus\_musculus:14:43859066:43859095:Plus  
UGAGUGUAUUCAUCCAAGGGGUGGCAAUGU  
>mmu\_piR\_000046|gb|AB251089|Mus\_musculus:6:127791433:127791462:Plus  
UGGACUAUGUCGAGUUAGGGUGGAAAGGGG  
>mmu\_piR\_008999|gb|DQ569100|Mus\_musculus:13:50338804:50338833:Plus  
UCACAAGAUGCCAGGUGUCUACUUUCUGA  
>mmu\_piR\_026077|gb|DQ709691|Mus\_musculus:15:83182506:83182535:Minus  
UGGGCAUCUGAGUGUUAUUAAGGGUCAU  
>mmu\_piR\_037218|gb|DQ725813|Mus\_musculus:7:28918889:28918918:Minus  
UACAGAUCAGUACAUUUUAGUGUAUCUACA  
>mmu\_piR\_016673|gb|DQ695934|Mus\_musculus:9:54014167:54014196:Minus  
UAUAAGAUGGAGUCUAUUAGGCAGAACACA  
>mmu\_piR\_009609|gb|DQ685200|Mus\_musculus:6:128411387:128411416:Plus  
UUCAAGCCAAACUCAUUAGGCUAACUGAGA  
>mmu\_piR\_015399|gb|DQ694031|Mus\_musculus:7:69777832:69777861:Minus  
UCCCCACAAAUAUCUCUCUAGGAAGUAGCC  
>mmu\_piR\_016850|gb|DQ696193|Mus\_musculus:17:27030525:27030555:Minus  
UAAAGUGCUGUUUGAUGCCAAAAGCAGGUC  
>mmu\_piR\_024728|gb|DQ707741|Mus\_musculus:5:150090274:150090304:Minus  
UAGACUGCUCACUAUGCUGUGGAAUACGG  
>mmu\_piR\_031697|gb|DQ717742|Mus\_musculus:5:115107969:115107999

:Minus  
 GCGUGCAACCCACCAAAGGCUGACUGUCAGU  
 >mmu\_piR\_012447|gb|DQ689609|Mus\_musculus:18:67185755:67185785:  
 Minus  
 AUAACAUCAAUGUUUAUGAGGCCAGAAACU  
 >mmu\_piR\_035215|gb|DQ722926|Mus\_musculus:10:85196652:85196682:  
 Plus  
 UGUCAAGGUUGUGGCAAUACUUUAUGACUGC  
 >mmu\_piR\_015264|gb|DQ693831|Mus\_musculus:18:67174064:67174094:  
 Minus  
 UAAAAACAUAUACAAACAACAUAUAAAUGGAC  
 >mmu\_piR\_034201|gb|DQ721440|Mus\_musculus:5:150087666:150087696  
 :Minus  
 UGAAAUGAAAUGAAAUAACUCAAGCACUCA  
 >mmu\_piR\_037041|gb|DQ725561|Mus\_musculus:9:67495546:67495576:M  
 inus  
 UCACACUGAUUGAUCUGUGAAUACUGAACCA  
 >mmu\_piR\_011891|gb|DQ688730|Mus\_musculus:10:62059079:62059109:  
 Plus  
 UAUAUAUAUAAAGUAUACAUAUAUACUAAA  
 >mmu\_piR\_029686|gb|DQ714891|Mus\_musculus:7:73694022:73694052:P  
 lus  
 CAGACUGGGUUAUUGUUUGUGUCUUUCCCC  
 >mmu\_piR\_009155|gb|DQ569530|Mus\_musculus:5:115100692:115100722  
 :Minus  
 UCAGCCAAAUUCUAAUCCAUAUUAUUG  
 >mmu\_piR\_003181|gb|DQ549037|Mus\_musculus:5:113582428:113582458  
 :Plus  
 UGCAAUUCAGCUUCCUGCGGUGUUGGUUGC  
 >mmu\_piR\_005919|gb|DQ557795|Mus\_musculus:2:92373262:92373292:P  
 lus  
 UGUGCUUGGCUUUGGUGUCUCGAGACUCAUC  
 >mmu\_piR\_008366|gb|DQ567190|Mus\_musculus:17:22402172:22402202:  
 Plus  
 UAGGUGACUUUAACUUUCCCUUGAUUGGUU  
 >mmu\_piR\_029503|gb|DQ714629|Mus\_musculus:10:86021047:86021077:  
 Minus  
 UGACAUUUCUAACCACUAAAUAACAAAUGU  
 >mmu\_piR\_004497|gb|DQ553164|Mus\_musculus:2:92398652:92398682:P  
 lus  
 UGGACUAUUCUGGGUAGCUGAGAUUCAGGC  
 >mmu\_piR\_010657|gb|DQ686860|Mus\_musculus:18:67186827:67186857:  
 Minus  
 UAGGUACCCACGUACUGUAAAAUAACAUGCA

>mmu\_piR\_037901|gb|DQ726797|Mus\_musculus:9:67534083:67534113:Plus  
UGAGACAAUGAGGUUCUCAAUAAAAGUGUGU  
>mmu\_piR\_031459|gb|DQ717400|Mus\_musculus:10:85193899:85193929:Plus  
UAGUACUCAUCAGAUGACACAUGAGAGGAUU  
>mmu\_piR\_011843|gb|DQ688661|Mus\_musculus:7:69777031:69777061:Minus  
UGAAGAUCUUGAUGAGUUUUUCAUGGCUUC  
>mmu\_piR\_015940|gb|DQ694850|Mus\_musculus:17:27045569:27045599:Minus  
UGGCCUGUAUCGCCUAUACACAGAAGGCAGU  
>mmu\_piR\_028584|gb|DQ713301|Mus\_musculus:12:98787899:98787929:Minus  
UAAGCUAACAAGCUGUUACAGUGUAUCCUUC  
>mmu\_piR\_028100|gb|DQ712626|Mus\_musculus:17:27056710:27056740:Plus  
UACAAUACAGGCUUGGAAGAAAGAGGUUCCC  
>mmu\_piR\_016581|gb|DQ695793|Mus\_musculus:15:59085169:59085199:Minus  
UGCAAUUAAUAUUUAGGUAAAUCCACUGGC  
>mmu\_piR\_004618|gb|DQ553605|Mus\_musculus:13:53410018:53410048:Plus  
UGGAUUCUGUUACAAGGUGCACAAGUCACU  
>mmu\_piR\_037967|gb|DQ726902|Mus\_musculus:7:73683819:73683849:Minus  
UAAGACAUGCCACCCUGUGAGAACCAGGGGA  
>mmu\_piR\_020768|gb|DQ701971|Mus\_musculus:9:54033948:54033978:Minus  
UGUCCAGAACUAGUAGAAGAUACACCUAUUC  
>mmu\_piR\_034170|gb|DQ721392|Mus\_musculus:13:50214128:50214158:Minus  
UAGAAAUUGACAGAU AUGCAAAAUAAGGG  
>mmu\_piR\_017615|gb|DQ697321|Mus\_musculus:18:67173992:67174022:Minus  
UAUAUAUAACAAUAUUUUAAAAAGGAAAC  
>mmu\_piR\_012038|gb|DQ688971|Mus\_musculus:4:93812673:93812703:Minus  
UCCAUUCACUACUAUUUAUUGCCUUAUCCUG  
>mmu\_piR\_019506|gb|DQ700105|Mus\_musculus:7:69776459:69776489:Minus  
UGCCU AUGUGUAGAUCUAAAGAUAAAUACUC  
>mmu\_piR\_038845|gb|piRNA\_2070|Mus\_musculus:2:150951276:150951306:Minus

UGUUUAAAUAGCAAUUGGGAUUCUCCUCAG  
>mmu\_piR\_034775|gb|DQ722259|Mus\_musculus:14:22937376:22937406:  
Plus  
UGAAGCCUCAAUGCCAUAACAAGGUGCAUGC  
>mmu\_piR\_010626|gb|DQ686811|Mus\_musculus:2:150846218:150846248  
:Plus  
CACCAUGGUUCAUACAUGUGUCUACUUAUGU  
>mmu\_piR\_012636|gb|DQ689900|Mus\_musculus:2:92382707:92382737:P  
lus  
UCGACUGAGAGGUCUCUUUACUACUCCCCUA  
>mmu\_piR\_013186|gb|DQ690751|Mus\_musculus:4:134901499:134901529  
:Plus  
UAAUAUGUCUAAAGCCUAGAGCCUUCACUUC  
>mmu\_piR\_019291|gb|DQ699787|Mus\_musculus:5:150084728:150084758  
:Minus  
UGAGCUGAGCAAAAGUAGCCAUCCUCUGCAG  
>mmu\_piR\_018538|gb|DQ698703|Mus\_musculus:7:73693080:73693110:P  
lus  
UGGCCAAAUCGUGCAUGCGCACCUUGUUUUC  
>mmu\_piR\_010041|gb|DQ685887|Mus\_musculus:6:128414799:128414829  
:Plus  
UUGGCUAUUUAAAGAAACAGGAAAGUUUGUC  
>mmu\_piR\_026806|gb|DQ710753|Mus\_musculus:9:20184492:20184522:M  
inus  
UGGAAUUAAGUUAUGUGUCCUAUGCCUGC  
>mmu\_piR\_035520|gb|DQ723354|Mus\_musculus:10:85194997:85195027:  
Plus  
UUGAGUAUAUAGUUCACAUUAUCAUAACCCAC  
>mmu\_piR\_034606|gb|DQ722017|Mus\_musculus:7:73689712:73689742:M  
inus  
UUAUAAGUGAAUACUAUAAAUCAAGAUGAAG  
>mmu\_piR\_015172|gb|DQ693701|Mus\_musculus:4:123343494:123343524  
:Minus  
UAGAAGCCAACGGUUAUGUUUGACCCCAGG  
>mmu\_piR\_034118|gb|DQ721321|Mus\_musculus:2:92354156:92354186:P  
lus  
UAGAUGGCACUUCAUGUUUGCUCUUAUGA  
>mmu\_piR\_022431|gb|DQ704419|Mus\_musculus:7:69786513:69786543:P  
lus  
UACACUGUCUUCACCUGACCCCAGGACCUGC  
>mmu\_piR\_009104|gb|DQ569383|Mus\_musculus:14:43710439:43710469:  
Minus  
UCACUUGAUGUCAUAUCUCCUGCUGGAGGU  
>mmu\_piR\_027320|gb|DQ711494|Mus\_musculus:9:54051682:54051712:P

lus  
UAAUUACAGAGAAGCAGAAAAGCAAUGUGCA  
>mmu\_piR\_031678|gb|DQ717718|Mus\_musculus:4:61711988:61712018:M  
inus  
UCCUCGUCGUCCUCCUGGUUUGGAGUUAACA  
>mmu\_piR\_014368|gb|DQ692525|Mus\_musculus:17:27047406:27047436:  
Minus  
UCCUUGACCGGACCUAAGCCAAGGUGAAUCC  
>mmu\_piR\_006622|gb|DQ561597|Mus\_musculus:18:67175704:67175734:  
Minus  
UUCUUCUACGUUUUAACUUCUAUCUGCCUC  
>mmu\_piR\_001998|gb|DQ544903|Mus\_musculus:8:96305866:96305896:M  
inus  
UCUUUUCUUUCCAGGGUGCAUCAUAAAUGC  
>mmu\_piR\_035715|gb|DQ723666|Mus\_musculus:15:59104298:59104328:  
Minus  
UAUAAAACAGAAAAUUUAUUGGCAGCAGCC  
>mmu\_piR\_001384|gb|DQ543270|Mus\_musculus:2:127391213:127391243  
:Plus  
UCCUCCUCGUCACUUACGAAAACCAUAAGUC  
>mmu\_piR\_002113|gb|DQ545344|Mus\_musculus:18:67179069:67179099:  
Minus  
UGAAAUGAUGCCAGGAUGUUACUGGAAUCCC  
>mmu\_piR\_004208|gb|DQ552123|Mus\_musculus:4:93778141:93778171:M  
inus  
UAAAACUCCAGGUAGACAUUAUGCAAUGGGU  
>mmu\_piR\_036440|gb|DQ724699|Mus\_musculus:15:59086258:59086288:  
Minus  
UGGGCAAUAAGACUGGACACUUAAGCGUUUC  
>mmu\_piR\_028773|gb|DQ713572|Mus\_musculus:6:86989721:86989751:M  
inus  
UAGCAGUUAACUAACUGUUCUUUCAGAAGUC  
>mmu\_piR\_004402|gb|DQ552816|Mus\_musculus:5:150071369:150071399  
:Minus  
UACAGGGACCUCAGAGAAAACAAGGGAUGU  
>mmu\_piR\_014962|gb|DQ693401|Mus\_musculus:7:73656793:73656823:M  
inus  
CAAACUCUCACAGAGGUCAAGAGAUGCAUCU  
>mmu\_piR\_009921|gb|DQ685696|Mus\_musculus:17:27063278:27063308:  
Plus  
UGCUCAUUGCCAUGACAGUAACAACCAAUU  
>mmu\_piR\_016255|gb|DQ695309|Mus\_musculus:9:51603471:51603501:P  
lus  
UGAGUGCAUUCACAUGUAUCUUUCUGAAAUG

>mmu\_piR\_010030|gb|DQ685872|Mus\_musculus:10:75283667:75283697:  
Plus  
UACUAAUGGUCCCAUGUCUCAAAACAUGCUU  
>mmu\_piR\_021480|gb|DQ702976|Mus\_musculus:15:59090269:59090299:  
Minus  
UGAACACACUGACCAGAACUAACUGGAAGGU  
>mmu\_piR\_025606|gb|DQ709006|Mus\_musculus:3:69157478:69157508:M  
inus  
UCCUAUGUAGUGCACAUAUACUCUUAUAAA  
>mmu\_piR\_005570|gb|DQ556771|Mus\_musculus:4:93808847:93808877:M  
inus  
UGUAAUUGUUGUAUUCUCAGUGUCAUUGGUC  
>mmu\_piR\_030035|gb|DQ715390|Mus\_musculus:15:59091345:59091375:  
Minus  
UGUGACUAUGGAGCAACAAGCUUGGGAGUC  
>mmu\_piR\_023428|gb|DQ705841|Mus\_musculus:17:27036788:27036818:  
Minus  
UUGGCUUUGCAAGAGCUGUAGUGUCCUCCCA  
>mmu\_piR\_001388|gb|DQ543274|Mus\_musculus:6:128157986:128158016  
:Minus  
UCCUCCUUCAGUGUGUCAAGAAGCUGGGCAC  
>mmu\_piR\_002722|gb|DQ547471|Mus\_musculus:7:73677904:73677934:M  
inus  
UGAGCUGAGCAAGUCGAUUCACAGGAUCCCC  
>mmu\_piR\_034903|gb|DQ722448|Mus\_musculus:12:98818046:98818076:  
Minus  
UCCAGCAGGUUUUACUGUUCAAGUAAUUGG  
>mmu\_piR\_024187|gb|DQ706972|Mus\_musculus:2:92385276:92385306:P  
lus  
UGCCACGUUAGCUUAUCGUUAGCUUAUCAUG  
>mmu\_piR\_007700|gb|DQ564820|Mus\_musculus:10:40170891:40170921:  
Plus  
UACCAGGGCCGAAAUGAAGUCAUUGACAUG  
>mmu\_piR\_017875|gb|DQ697687|Mus\_musculus:2:92346509:92346539:P  
lus  
GCUCUGUAAACAACUGUUGUUAGGCAGCGA  
>mmu\_piR\_029998|gb|DQ715338|Mus\_musculus:14:22950542:22950572:  
Plus  
UAGAGCAAUCUCCUCUAACUCAGGACAUACA  
>mmu\_piR\_016781|gb|DQ696087|Mus\_musculus:4:93796455:93796485:M  
inus  
UAUAAAGCACAAAGACCAAGGUGACUGACUGG  
>mmu\_piR\_009409|gb|DQ684858|Mus\_musculus:15:78489982:78490012:  
Minus



UGUUAGCUUGAUUUCUGACUUCUCAUAUUU  
>mmu\_piR\_007974 | gb | DQ565796 | Mus\_musculus:10:18491799:18491829:  
Minus  
UAGAAUGCCCUAUGAAAACCUCUGCCAUGGU  
>mmu\_piR\_011010 | gb | DQ687401 | Mus\_musculus:4:93791043:93791073:M  
inus  
GCUAUCUAGGAGUUGUUAGAUGUUAUCUCA  
>mmu\_piR\_024456 | gb | DQ707344 | Mus\_musculus:7:72990109:72990139:P  
lus  
UGGAAGGUGAUCUGGUUCCACUUAGCCA  
>mmu\_piR\_030072 | gb | DQ715443 | Mus\_musculus:7:125123748:125123778  
:Minus  
UAAGAGUCUGUACAAGGUGUACAGUGUAU  
>mmu\_piR\_025236 | gb | DQ708465 | Mus\_musculus:15:59099016:59099046:  
Minus  
CUCACUGUGAUAAACUGGAGCCACCCAAGA  
>mmu\_piR\_015876 | gb | DQ694758 | Mus\_musculus:15:59102042:59102072:  
Minus  
UGAUAGGUUUUUGCUUCCUGGAUUGCUGUC  
>mmu\_piR\_013353 | gb | DQ690998 | Mus\_musculus:18:67186152:67186182:  
Minus  
UGGACACCCUGUAUGUCUAAGCCAGCCAGCC  
>mmu\_piR\_036446 | gb | DQ724705 | Mus\_musculus:6:81864035:81864065:M  
inus  
UGAUUAUGCAUUCUGUAUCCCAGGCAAGGC  
>mmu\_piR\_005561 | gb | DQ556754 | Mus\_musculus:11:103263745:10326377  
5:Plus  
UGUAAUGCUUUCUGACCAAGGUGUCACCAUG  
>mmu\_piR\_008500 | gb | DQ567645 | Mus\_musculus:X:100601505:100601535  
:Minus  
UAGUCCAUCAUUGCCUAAGAAUUUCAUG  
>mmu\_piR\_018022 | gb | DQ697890 | Mus\_musculus:4:93782133:93782163:M  
inus  
UAAAAACUAACUUUAGGACAAGUAUGAUGAU  
>mmu\_piR\_023816 | gb | DQ706431 | Mus\_musculus:14:22927639:22927669:  
Plus  
UGUUUAUGGGAAGAAGCAACAAUUGAUGUC  
>mmu\_piR\_012275 | gb | DQ689355 | Mus\_musculus:6:127798584:127798614  
:Plus  
UGUUACCUUCAAUAAGACACGACUCGAUGC  
>mmu\_piR\_022112 | gb | DQ703918 | Mus\_musculus:10:75303245:75303275:  
Plus  
UAGUUGAUGUAGACCCUGAGAAAUGAAAGC  
>mmu\_piR\_004656 | gb | DQ553715 | Mus\_musculus:2:92392317:92392347:P

lus  
UGGCAAGGUUCCCUACACCCCUAAACUUUAC  
>mmu\_piR\_015171|gb|DQ693699|Mus\_musculus:9:54082086:54082116:P  
lus  
UACCACAUUCAUGGUACAUGCCACUAGCACC  
>mmu\_piR\_028398|gb|DQ713038|Mus\_musculus:7:29845246:29845276:P  
lus  
UGUAUAAAGUGAAACGAGAUACUAAAGACAU  
>mmu\_piR\_012282|gb|DQ689365|Mus\_musculus:6:127773390:127773420  
:Plus  
UGAGUUGACCAAUAGAACCACCCUCUAGGUU  
>mmu\_piR\_039324|gb|piRNA\_3045|Mus\_musculus:7:72985147:72985177  
:Plus  
UGCAAUGGUUCACCCUACUGCUGUGAGCC  
>mmu\_piR\_009623|gb|DQ685216|Mus\_musculus:14:22944212:22944242:  
Plus  
UGCAAGAAUGUGCUGUGAAGAGAAAAGCCCU  
>mmu\_piR\_036952|gb|DQ725434|Mus\_musculus:2:92356146:92356176:P  
lus  
UGCAUGCAUAAAUUUGCCAAGGGAAUGCCA  
>mmu\_piR\_036179|gb|DQ724334|Mus\_musculus:2:150842002:150842032  
:Plus  
UAAGAUUUGUAAAUCUUCAGUAAAAGCCUCU  
>mmu\_piR\_012630|gb|DQ689893|Mus\_musculus:2:150941142:150941172  
:Minus  
UAGGUAUCCCUAAAGAAGUAACAAAGAGCUC  
>mmu\_piR\_013710|gb|DQ691545|Mus\_musculus:18:67164823:67164853:  
Minus  
UCCAGUGCGUCCAUAUAACUUUCUUUGUU  
>mmu\_piR\_036527|gb|DQ724822|Mus\_musculus:9:67536753:67536783:P  
lus  
UAAUAAGCCAUAUGCCUACCCUAUCUUUGUU  
>mmu\_piR\_039743|gb|piRNA\_512|Mus\_musculus:14:18434765:18434795  
:Minus  
UACAUUUGUGUUUUUGAAAACCAUGAGCUG  
>mmu\_piR\_030643|gb|DQ716244|Mus\_musculus:1:94824196:94824226:M  
inus  
UGGUUUUCUUUCACAUGC UAAUGCUGAUUACC  
>mmu\_piR\_022580|gb|DQ704623|Mus\_musculus:9:54028407:54028437:M  
inus  
UUACAGUACAUGAUUACUAGACAUUUGCUG  
>mmu\_piR\_020654|gb|DQ701813|Mus\_musculus:2:23328840:23328870:M  
inus  
UGAAACAAUCUGUCUUACACAUGCCUAGUCC

>mmu\_piR\_007105|gb|DQ562820|Mus\_musculus:18:67171595:67171625:  
Minus  
UUUGUGGGCCCGUGGCAAUGCAGAAAACAUC  
>mmu\_piR\_009313|gb|DQ684692|Mus\_musculus:3:35066809:35066839:P  
lus  
UCACAACCUUAGUGAACUUGUUGACGCUACC  
>mmu\_piR\_031407|gb|DQ717323|Mus\_musculus:15:59082096:59082126:  
Minus  
UGUCUCUUAGAAACCAUGAUUCUUUCCAGA  
>mmu\_piR\_022705|gb|DQ704809|Mus\_musculus:12:98799483:98799513:  
Minus  
CCCAGACUCAUUACACAAGAGUACCUGCUG  
>mmu\_piR\_029946|gb|DQ715271|Mus\_musculus:9:67508053:67508083:M  
inus  
UGAGACAAGUUGUUUGCAGAUCUUUUAGUGG  
>mmu\_piR\_011681|gb|DQ688421|Mus\_musculus:15:98368939:98368969:  
Minus  
UAAACCGUUGUUAAGUUCCUAGAACUCUG  
>mmu\_piR\_009345|gb|DQ684739|Mus\_musculus:8:113018433:113018463  
:Plus  
UGCAACGAAAAUGGUUUUGUCUCAGCAGACC  
>mmu\_piR\_013988|gb|DQ691973|Mus\_musculus:11:103259159:10325918  
9:Plus  
CCUCUAUUUAAAUCUAAACUUUACAUCAGGG  
>mmu\_piR\_009005|gb|DQ569122|Mus\_musculus:8:95080707:95080737:P  
lus  
UCACACACAGGGAUGGCUGAUGGAACCCACA  
>mmu\_piR\_013056|gb|DQ690561|Mus\_musculus:11:103251427:10325145  
7:Plus  
UAAUAUACUGAUGAUGCUCUAUAUGCAUGGG  
>mmu\_piR\_019033|gb|DQ699413|Mus\_musculus:7:69779185:69779215:M  
inus  
GACAUGGCUAAACGAUGACAGAUUGAAGAA  
>mmu\_piR\_031701|gb|DQ717746|Mus\_musculus:18:67172460:67172490:  
Minus  
UACUUGCUUAUCACAAGAUUUCCAGGCUUC  
>mmu\_piR\_035127|gb|DQ722794|Mus\_musculus:7:73666755:73666786:M  
inus  
UACAAAAGGAGAAACUGAGACUUGCUUUGGC  
>mmu\_piR\_007434|gb|DQ563892|Mus\_musculus:6:127765451:127765482  
:Plus  
UUUUGGGUGUUUCAGUCCCUUCUCAGCUGGUC  
>mmu\_piR\_037809|gb|DQ726660|Mus\_musculus:4:57453474:57453505:M  
inus

UCCAAGGUGUAGAACGGAAAUACCCGGGAGGU  
>mmu\_piR\_002049|gb|DQ545100|Mus\_musculus:6:127801813:127801844  
:Plus  
UGAAACCGGUGAACCUAUCAGGUGCUCAUCCU  
>mmu\_piR\_008413|gb|DQ567341|Mus\_musculus:2:150837917:150837948  
:Plus  
UAGGUUGUCAUCACAUGGUAACUUCUCCUC  
>mmu\_piR\_030283|gb|DQ715746|Mus\_musculus:7:72983072:72983103:P  
lus  
UCCACGGAAUACUCCCAGCCUACAAUAUGGA  
>mmu\_piR\_036880|gb|DQ725329|Mus\_musculus:2:150941252:150941283  
:Minus  
UGGCACAUAACAUCACCCACUACACUCAUCUC  
>mmu\_piR\_014270|gb|DQ692382|Mus\_musculus:Y:1171627:1171658:Min  
us  
UAAUAAUGGUCCAUCUUGCCACAAUACAGCAG  
>mmu\_piR\_011479|gb|DQ688113|Mus\_musculus:7:73684426:73684457:M  
inus  
UAUCUAUCCCAAACUCAACAGGGAGAGUAAA  
>mmu\_piR\_031067|gb|DQ716849|Mus\_musculus:5:102074212:102074243  
:Minus  
UCCAGCCCAUAACUAGUAGAUGGAAAGCAAA  
>mmu\_piR\_020597|gb|DQ701724|Mus\_musculus:15:74474656:74474687:  
Plus  
UAGUUGGUAAAUGUAUUCUAAAUCUAGCCUC  
>mmu\_piR\_018636|gb|DQ698842|Mus\_musculus:5:150082260:150082291  
:Minus  
UAACUAAAGAGAGCUCCAAGAGUUCAAAGAGC  
>mmu\_piR\_010528|gb|DQ686662|Mus\_musculus:18:67180093:67180124:  
Minus  
AGUUGAUGUAUAUUCUGAAGACAGAGUUGGUA  
>mmu\_piR\_019906|gb|DQ700712|Mus\_musculus:17:27024689:27024720:  
Minus  
AACACAGAUUUUAAAAGUACACAUUUUUCUGG  
>mmu\_piR\_032390|gb|DQ718737|Mus\_musculus:10:127092169:12709220  
0:Plus  
UACAGGUUCGGUAAAUAGUCCAAGUUGGUC  
>mmu\_piR\_035328|gb|DQ723087|Mus\_musculus:17:27037247:27037278:  
Minus  
UAAUACAGUUGACAUUCCAUCGGUGAGACC  
>mmu\_piR\_030479|gb|DQ716023|Mus\_musculus:6:127768755:127768786  
:Plus  
UAAUAAGGCUGACUCCACAGGACUACAUUCC  
>mmu\_piR\_038111|gb|DQ727108|Mus\_musculus:2:150941869:150941900

```

:Minus
UAGGUGUCUCUUUGUGGCCAUAAGGCAUAGUC
>mmu_piR_008296|gb|DQ566937|Mus_musculus:5:150093139:150093170
:Minus
UAGGCAGUGUGAAGAAAGGAACCGUCCGGCU
>mmu_piR_002747|gb|DQ547570|Mus_musculus:5:113565137:113565168
:Minus
UGAGGAUACUUGGACAGGUGCUUUCUGAAUGU
>mmu_piR_009670|gb|DQ685291|Mus_musculus:7:69757237:69757268:Minus
UGCAUUUUGGUCAAAACAAUAGCUGGGUUGGU
>mmu_piR_018820|gb|DQ699117|Mus_musculus:17:27083123:27083154:Plus
UGCUCAAUAAGCUGUAGCCUAGAGUGGGCAAU
>mmu_piR_020635|gb|DQ701778|Mus_musculus:6:87958155:87958186:Minus
UGAAUAAAUAUAAACUACCAUUUUUUUAGAGU
>mmu_piR_039222|gb|piRNA_2873|Mus_musculus:7:72984429:72984460
:Plus
UCUACAACAAAUUGGACACUCACCUUCCUUG
>mmu_piR_021605|gb|DQ703162|Mus_musculus:12:98797822:98797853:Minus
UCGUAUUUCAUAGUCUCCUGUGAGACUCGAGG
>mmu_piR_012393|gb|DQ689525|Mus_musculus:10:86004988:86005019:Minus
UCCUGAUUUUGUAGGACAAGAGGCCACACU
>mmu_piR_025416|gb|DQ708727|Mus_musculus:12:98823284:98823315:Plus
UGACAGAUGCAUAUUCUGUGCCCUUUUCGCCU
>mmu_piR_038559|gb|piRNA_1521|Mus_musculus:17:27065947:27065979:Plus
UACAUCCAGAAGAGACCCAAAAGGAGAUGGGCC
>mmu_piR_038459|gb|piRNA_1326|Mus_musculus:17:27072915:27072948:Plus
UUGAAGGUAGAGAAGGUUACCCCAAAUGGGUUU

```

(3) List of 1,418 samples in  $S^-$

```

>piR_pseudo_2813
GUGUCUAAUGAAAAACAAUGAAUU
>piR_pseudo_15137
UCAGUUUUGCCGGUUGAUGACCUU
>piR_pseudo_18201
GUUACAUAGACCAUGAAUAGCGAAA
>piR_pseudo_13054

```

AAACUGUAGGUUUCUAAUAUCUUCG  
>piR\_pseudo\_1116  
CUUGAAGACUUAAGUCGUUCCAGGA  
>piR\_pseudo\_17025  
UGGUCUAUUGCGAAGAGCGUGUUGU  
>piR\_pseudo\_25665  
GGGAAGGCUCCAGGCAUUUAUGAAU  
>piR\_pseudo\_12340  
GCCUUUAGUCAUCAGCACCCCUACA  
>piR\_pseudo\_17494  
AAAUAUUGGGCCUUAUAUCUGACUUA  
>piR\_pseudo\_18889  
UUUGCCCAACAAGUUUUUGCGAAAUU  
>piR\_pseudo\_23188  
CACAUUGUGUUUCAUCGACAUCGACUC  
>piR\_pseudo\_5286  
GGAAAUCUGUUUAAGAUGGUUUUACA  
>piR\_pseudo\_16394  
CAAACAUGAGGACUGCAGGUAAUGUU  
>piR\_pseudo\_20320  
AGUAGCCAACGGGGCUUCCAGUAUUC  
>piR\_pseudo\_20613  
UUUUCUGCACGGGCCUAGCUUUCGA  
>piR\_pseudo\_1220  
UCCCACAAGUCAAAUCAAGAUCUCCG  
>piR\_pseudo\_13879  
UCCACAAUAGGUUUUCCAUGAUCUCA  
>piR\_pseudo\_22360  
UCGGAUGGCAUGUGUGAUUCAUGUC  
>piR\_pseudo\_17918  
CGCACCAGACGUAGGGGGCCAAUGUU  
>piR\_pseudo\_19670  
UAAAAACGUCAAUACGGUAUAGAAA  
>piR\_pseudo\_2345  
CUCUAACACGGUUCGAUUCGAGGUAU  
>piR\_pseudo\_8842  
AUGUCAGUUUUUAGUAAGGAAGCGCA  
>piR\_pseudo\_13584  
CAUUUAGAACGGGCCACAGUUCAGCG  
>piR\_pseudo\_20559  
GCACAAAGGGUUAUGAAGGUCUUUGG  
>piR\_pseudo\_22132  
CUCUGGAGGUCCAUUUUUUAAGGUG  
>piR\_pseudo\_24328

GUAGAAUCCGUACUCCUACUCAGUU  
>piR\_pseudo\_436  
UCUGAUCUAUCGAAGAUCAGGAUCU  
>piR\_pseudo\_20410  
UCGUAGGGAAUGGAUUGAAAAACUCC  
>piR\_pseudo\_27344  
AGCAAGAGUGAGGCGCCAGUGUAUAA  
>piR\_pseudo\_22931  
CCAUGGAGCAGGCCUAUGUCGGUUC  
>piR\_pseudo\_13702  
AUAUUGACAAAUUUGAUUUUGUACUCG  
>piR\_pseudo\_17409  
UUUGAGUGUGACGGAGAGUCUCGCACU  
>piR\_pseudo\_5537  
AAUACUGAUGUGCUGCCACGUGGAACA  
>piR\_pseudo\_26200  
GCACAGUAGGCUUCCUACUCGAGAGUA  
>piR\_pseudo\_16806  
UAAACCCUGUAUCGAGUUAUUUGUUAC  
>piR\_pseudo\_1177  
AUUUCUUCGUUUUCUGUAAAAUCACUG  
>piR\_pseudo\_14861  
UGGAAAUCUGCAUAGCUUCACCAUUA  
>piR\_pseudo\_7571  
UUCUACAUGUGGACGCGGGGGCGCGG  
>piR\_pseudo\_6406  
ACGGCACAUAUCAUAUAGGUGAAGU  
>piR\_pseudo\_15933  
GAGGUUUGCUUAUUGAAGCCAACUAU  
>piR\_pseudo\_3222  
UAGGAAUCAUUAUUAACCGGGUUAUG  
>piR\_pseudo\_19317  
GGGUGGGAUACUAGGUUUGCCAAUAGU  
>piR\_pseudo\_22378  
CGCAAUCGAUAUAGGUAAGCGAAUUUGU  
>piR\_pseudo\_12520  
GAACAUUGUACGGACAUUGGGGUUUUA  
>piR\_pseudo\_13139  
UUUGCUUUUUAGUCCAGGAUACUUGUU  
>piR\_pseudo\_22974  
CAUAGGUAUGAGUGCCGAAUCCGCCUGC  
>piR\_pseudo\_12760  
AUUGUUAAGUUAGUUGACACCGAAAUCU  
>piR\_pseudo\_11571

UCAUUGAAAUGACACUUUCGUCGACAGG  
>piR\_pseudo\_7835  
CAGGCUAUAAAAUUGAGUUGAUGGGCAC  
>piR\_pseudo\_16743  
AUGGAUACAAAUCUCGUUUUUUCUCAA  
>piR\_pseudo\_15250  
UGUUCUGGUUUGUACCUGAAUCGUUAU  
>piR\_pseudo\_2135  
UAGUAUUUGGAAAGGGCUCCCAAUUUU  
>piR\_pseudo\_24169  
UGACCACAGGAAUACGGUUGAGUAUGGG  
>piR\_pseudo\_12815  
ACUGUGUGCCGGUUGAUCAGUCAAUAGC  
>piR\_pseudo\_14371  
UUGCAAGUCGGUUCUCGUACGUCCGGC  
>piR\_pseudo\_15761  
GAGACAUAGGGAUCGUUGGUCUUCGUUA  
>piR\_pseudo\_2142  
UCUUCAAAAGAAUCCGAAGGCUGGUUAU  
>piR\_pseudo\_19926  
CGUUACCACGAGUUGAGGGUCAUUUGCG  
>piR\_pseudo\_14412  
GAGCAUGUUGGUUAGCCUAAACACGAUA  
>piR\_pseudo\_2499  
UCCUGCAGGCUUUUGUAGGCCCGAGUGA  
>piR\_pseudo\_20901  
CCGUGCCGGCGCAGGAGCUGAUAUUGGC  
>piR\_pseudo\_23557  
GGGAAUUGAGAGGCAGGUUGCUUGAGC  
>piR\_pseudo\_25639  
AUUGGGACACUGUAUAAAUUCUGAGUAG  
>piR\_pseudo\_13378  
GACGAGCUCCUAGCCACCGUCUCCAUG  
>piR\_pseudo\_16577  
CUUAUAUUAUCUUCAAAUACAUAUUAU  
>piR\_pseudo\_12963  
AAUCGUCCAUGCCAGGCUUAGCUACAU  
>piR\_pseudo\_16821  
GGCCUCGAGUUUGACGUUCCUAGUAGAG  
>piR\_pseudo\_8786  
GGUUACGUCUCGGGGCCAAGCCCGCACC  
>piR\_pseudo\_1766  
UAUUCGCGGGUAGUGAUAAUCGGCGUU  
>piR\_pseudo\_14526



GUGGCCGGUAUGGGUCUCAGGUCUUUCC  
>piR\_pseudo\_22981  
UUACUGGGGUCACCUAAGUCUGGGUAGU  
>piR\_pseudo\_12899  
GGAGAGGAUGUUGGGCAACUAUAGACCA  
>piR\_pseudo\_26249  
UGGCCGUCAGCCCCUGCGUAUUGGGAGC  
>piR\_pseudo\_20187  
AGCGCGGUCAGGCGAAGGAGGGAUUGUC  
>piR\_pseudo\_26340  
UGAUUUACUUGUGGUGUUUCUGUGUGUG  
>piR\_pseudo\_22177  
AACUGGUAAGCAGGAAUCAGGACCUACG  
>piR\_pseudo\_23679  
GCAUGUAAGCUGUCCUGGUGCCUUCGGG  
>piR\_pseudo\_13072  
UCUAAUAGUCAUGAUGACUCGCGUUGGA  
>piR\_pseudo\_20321  
UUGCAAUAAUGCGCAGGCACAGUCGAUC  
>piR\_pseudo\_3920  
UCCCGCAUUGUUAUCAUAACCACUAAAG  
>piR\_pseudo\_18865  
UGCACAACUCCUGAUUAGACUAAGUCUG  
>piR\_pseudo\_15026  
AACUUUACACAUAUAGGAUAACUGAGCUA  
>piR\_pseudo\_14697  
GUUGGGAUUAACCUCUACGAGGGCUACA  
>piR\_pseudo\_11833  
UUGGGCACAUUCAGGCGAAUCUAAUCCC  
>piR\_pseudo\_6769  
GUAUUCUGAAUUAACCUAAGCUGGACCG  
>piR\_pseudo\_16615  
AGUUUAUACCAAGGUUAGCUUACAUCGCA  
>piR\_pseudo\_18234  
UCCAAACUUGCGAUUUAUCCUUGUACUAU  
>piR\_pseudo\_22856  
UAUCUUCAUUUUCUUUCAUAGAAUUA  
>piR\_pseudo\_23995  
CGUGUCUAACCGGCGUCGUUAUGUUCAU  
>piR\_pseudo\_14043  
GGGUUACGGCGUAAAGCACAACGGUCCC  
>piR\_pseudo\_19225  
AUACUGGCCUAGCGACUCGGUUUCAUAA  
>piR\_pseudo\_1058

UUUGGAAUUGUAAGUUUAGUGUUCAUAU  
>piR\_pseudo\_9605  
CGUGCGUAAUACAGUUUUGUGCUAACGC  
>piR\_pseudo\_20291  
GUCCGUAAACGAAGUGUCUGACACAUUC  
>piR\_pseudo\_10008  
GUUAGCGUAGGAUACGCUCAAAUGGAAA  
>piR\_pseudo\_20384  
AAUGUUUCCAAUAUUUGUACCUAUACUG  
>piR\_pseudo\_8500  
ACUCUUACUAACGCGAUUGUUGACAAG  
>piR\_pseudo\_18072  
GCGACCCGCUCUUCUGAUCGUGUAAUCA  
>piR\_pseudo\_17355  
AUAGAUCUAAUAUUUCCCGUCCUUUA  
>piR\_pseudo\_12749  
GCUAUCUUAGACAUUGCGUAGUUUGAAU  
>piR\_pseudo\_14606  
CCGCGCCAUGGUCACUUACGUUGUGUUC  
>piR\_pseudo\_20748  
AACUAUGAUAUACGUGGGUUAUAGACAC  
>piR\_pseudo\_20635  
GGUUGCAAGCCCACCAUGGCUAGACCCCG  
>piR\_pseudo\_25515  
CGAGGUGCUUAGGAAACCGAGUGCGGGUA  
>piR\_pseudo\_20069  
UAUAAUUGUACUAUAUUGAUGACAAAGAG  
>piR\_pseudo\_16336  
ACCCGGCUGGCGGGCGGACCGUACAUCA  
>piR\_pseudo\_17362  
AGGGGAUAAUCUGCCUAUGUUUAUAGCUU  
>piR\_pseudo\_9191  
GUGGUACACUGACGGUGCGACGCUAGUGG  
>piR\_pseudo\_8009  
UACUUAAUGAGAUAAAGCAACCCCGUCGU  
>piR\_pseudo\_16796  
GCCGAUAUUCGGUUGGGCACGGUGGUCAG  
>piR\_pseudo\_21311  
GUCGCCGUAUCCGGCCGCCUGGUAGCGC  
>piR\_pseudo\_16805  
GAGUUGUUUGCCAGUGCCAAAACGGUGUA  
>piR\_pseudo\_19732  
CGUUGAUUGUCUGUCGGCUUCGUGUCUUA  
>piR\_pseudo\_11455

GCUACCUGAUCGGUAUACAAUUAUUAUGG  
>piR\_pseudo\_20066  
GGUGGGUCCACUCAGCCCAUACCGCAAU  
>piR\_pseudo\_24717  
GGACCAGACACACUGCUAGGAGCGUCAGC  
>piR\_pseudo\_6494  
GUUUACAUAUAUACUCGAUUCAGGUUCGC  
>piR\_pseudo\_5899  
CGCAUCCGGCCUAUUGCUUGUACUUUGUC  
>piR\_pseudo\_27902  
UCGUUCAUGUAUACUGGUUCACAGGCCUC  
>piR\_pseudo\_19325  
AAAUCUUCAACCGAGGUGGUAUCCUGGGC  
>piR\_pseudo\_9441  
CCGGACGAGACUCGAUUGACAGUCCAGCA  
>piR\_pseudo\_21705  
AGAUUGUGUAGGAUAACAGGCUUAACUAC  
>piR\_pseudo\_21091  
CUAACAAUAAAACUCCUAAGCAUUUAGU  
>piR\_pseudo\_21910  
UAAAGAACCCCUUAUAAGAGGUCGGUAAG  
>piR\_pseudo\_15597  
UAUUCUGUGGUUACUAGAUACAUAACGGU  
>piR\_pseudo\_27784  
CAACGCCGGCUCUGGUCUGUAGACACCUG  
>piR\_pseudo\_16912  
UACGAUUAUCAUAGGGUUUUUGUCGGCA  
>piR\_pseudo\_27363  
AGGAACGGAAACAUGUAUCUGAUAGACAU  
>piR\_pseudo\_24756  
UCAUACCUCGUCGCAGAGGAGCUUUCAGG  
>piR\_pseudo\_13424  
CUUCUGACGCCGGUGUGGCAUGUCUGUGC  
>piR\_pseudo\_23574  
AAACCACGGAUCCCAACUGGUGUGUUUU  
>piR\_pseudo\_15605  
CGGGCGUAAGUGGUCGUGGCGUAGCACAC  
>piR\_pseudo\_23888  
GUAGGUCGUCGCUCAUCUACAAUUAACCA  
>piR\_pseudo\_22315  
CGGUGAUACCUGUUUGAGGUCUUGACCCU  
>piR\_pseudo\_7567  
GUACUACCUAUGACGCGGGUACUUCUACG  
>piR\_pseudo\_23632

GCCUGUCCACUGAACCCAGCGCCGUUACA  
>piR\_pseudo\_26123  
GUUCUACAGUUAAGGUGCAGGCCAAGCC  
>piR\_pseudo\_26270  
UUUCAUCUAGUUAAGGUUUGCCCAUUAGC  
>piR\_pseudo\_26629  
GGCUUACUGCCCGGUCCCGCACGGGCGCC  
>piR\_pseudo\_14456  
CCUGUAGGUAUCAUAAGCUUCAGAUAAUC  
>piR\_pseudo\_8461  
ACCGCUGUGGAAUUAACCCUCUGGGUU  
>piR\_pseudo\_11539  
CGCAGGCUGUGCGCAUGCCCACUUAGCUU  
>piR\_pseudo\_10580  
UAUCCUGCGAUUACAGGGCUACACUGCCC  
>piR\_pseudo\_14974  
AGUGACUUUCUCACACGGAGAAAGGGUG  
>piR\_pseudo\_2620  
CGAAAACUUGAUAGUCUAUUAACGAUGUA  
>piR\_pseudo\_17462  
CUGCCGGGCGUUGCAAGAUACUUCAGAGC  
>piR\_pseudo\_12910  
UGCCCUGUACUGCUUGGCGGACAUUCUAU  
>piR\_pseudo\_24127  
CCGCCUUUAUCCCUACCAGUCGACAUUAG  
>piR\_pseudo\_18056  
GCAACCUUCUUGUGGGCGAUUCGAAUUCU  
>piR\_pseudo\_1520  
CGGCUUGGCUUUCUAUUUUGGUCAUUUGA  
>piR\_pseudo\_18134  
AGAUAGAUUUAACAGGCGCUUUUCAGUA  
>piR\_pseudo\_27575  
UUUGAGAAUACGUUAAGACCAACCCGCA  
>piR\_pseudo\_1173  
UAGUAUAUGGGAACUUAUCAAUUUCAC  
>piR\_pseudo\_18925  
GCUGUUGUCCAUGGGGAUACGGCACGGCC  
>piR\_pseudo\_17700  
GGAGUGCGCGGGGUGCGCCGUGCGGAGCC  
>piR\_pseudo\_22817  
GGCGUAUGCUAAAAUUACUGAUGACUGCU  
>piR\_pseudo\_16434  
AUUACAACGUUCUUUCAGACCCAUUGAGC  
>piR\_pseudo\_27418

UACUACAGCCCUAUUUGUGGGUCGUUCCU  
>piR\_pseudo\_19893  
CGGUCCGAGCAGACGAAUUGUCCAACCCC  
>piR\_pseudo\_24682  
GGCUAUUCCUAUGGCUGGACUGGCUUUUA  
>piR\_pseudo\_27514  
UUUAUCUUAUGAUAGCUCGUGAGAAGCGA  
>piR\_pseudo\_20771  
CAGAUGGGGCUGUUUCGAUUCAAGUAUAU  
>piR\_pseudo\_27596  
CUCUGCAAUAGCGGUCGGUAGUCGGUCCA  
>piR\_pseudo\_2902  
UACACCCGUAGUUCGGCUAGGACGACAAG  
>piR\_pseudo\_23124  
GCACUUUCCUGAGUCCCGGACAGGCUAGU  
>piR\_pseudo\_3192  
CCGCGAAGGUCCAUGACGAGGUAUGUUUA  
>piR\_pseudo\_10606  
ACGCCUUAACCCGAAACUGCUAGGAAUA  
>piR\_pseudo\_15748  
UCGUUUCAUGAGAAAUACUUUGUUUCAA  
>piR\_pseudo\_12566  
ACCCAAUAUAUAGCAAUUGCCAACUAUU  
>piR\_pseudo\_12866  
ACUUACGUACAUCAUUAAGAUAGUAGAA  
>piR\_pseudo\_9620  
AGCAUCAUUGCGUUUCCAGGCCUCAGCGC  
>piR\_pseudo\_6073  
AAGGUUCUCACAGAUACCUCACUGUAGCA  
>piR\_pseudo\_3784  
AGGAACACACAUCCUAAGGGUUGUCCUGU  
>piR\_pseudo\_14719  
AUUCCAGAAGGCAGGGUCGAUGCACACCC  
>piR\_pseudo\_27465  
UGUUCGUGUAGGGUGGGAUGACAGUAGUG  
>piR\_pseudo\_207  
CCGUCGUCUGCGUGGCUUAUUGAUGAUGU  
>piR\_pseudo\_24185  
UAUCGCGCGUUCUAAAAGGUACGGCUCGA  
>piR\_pseudo\_24924  
UAACUUUCGAUGAUUACUUCAUUUCGGUU  
>piR\_pseudo\_23824  
CUCGGACUAAAAAUUCGCCAGAUACAUU  
>piR\_pseudo\_16657

ACGUUGGUUGGAGCUACAGUCGAACUAUG  
>piR\_pseudo\_3296  
CGGAAGCCAAUCGGACGACGUGAUCCGCG  
>piR\_pseudo\_11699  
UUUUUCAUGCAUGUAAUAGAAUAAAAC  
>piR\_pseudo\_18847  
ACAUCAUCUUUAUUCGCGUUAUCC  
>piR\_pseudo\_22872  
CAUUUCAGAUCCCCGUUGGGGCGCGUCA  
>piR\_pseudo\_19935  
AUGCUGACAGGAGACCUACCUAUUGCUCU  
>piR\_pseudo\_19784  
CCGAUGGUACUUAGCGGUUCGUCCUACGC  
>piR\_pseudo\_47  
GAGCAACAACUAUGGACACUUCGUGCCAA  
>piR\_pseudo\_1492  
GGGGCUGCCCAGCUACCUAGUGUGUCCCC  
>piR\_pseudo\_9299  
AUGAACGCUACUCGUCUUGUAAUGAUGAC  
>piR\_pseudo\_16160  
GCGGCGCCUAAAAGGGUUUGGUUAACAU  
>piR\_pseudo\_21824  
AUUUACGCUUGGAUAGUGGGCCAUCUCCA  
>piR\_pseudo\_12601  
AGCGCCAUUAGGUGUGUCUUGGGGUGAG  
>piR\_pseudo\_23483  
UGGACAGUCUAGUUUUUUUGUUGUUGCGC  
>piR\_pseudo\_7679  
AUGUUAAGUUAGCUUCUUGACCCCGUUUU  
>piR\_pseudo\_13701  
UCUGUAAUCGCGCCCGAAUUAUAACCUUA  
>piR\_pseudo\_23645  
AGAAUUCGUAUUGAGAAUAGUCUGGAAUU  
>piR\_pseudo\_6749  
AAGCCUGGCUAGGGGUGUGCUUUUACUAG  
>piR\_pseudo\_7795  
AAAUGGGAUGCGGUCAACGGGCUUAGGUA  
>piR\_pseudo\_23115  
UGGAAAACGCACAAGUCUAGCAGCAUACA  
>piR\_pseudo\_22479  
CACGACUGUAUGUGCACGAACGUGGAAAU  
>piR\_pseudo\_21173  
AUCUUCGACGGACCUUCAUGAGUGAUUA  
>piR\_pseudo\_21886

UUGUGAAAUACAUCUUUAUUAUUAUUA  
>piR\_pseudo\_26437  
GCGCUCGCUACUAGACCUAUGCUUCACC  
>piR\_pseudo\_23098  
CCUCCUUUAUGUUUGAAGGACGAACGCA  
>piR\_pseudo\_11932  
UAUAAACUCGCCAGGUUGAAACAUAACCGA  
>piR\_pseudo\_5815  
UCCGACCUGACCCGGUCAUAUAGUGCCUG  
>piR\_pseudo\_24646  
CCUCCGCCGCGCCGUUCGGCUCGGUGGGU  
>piR\_pseudo\_18892  
UGCGAAGUGAGCGUUUAGCAUCAUAAC  
>piR\_pseudo\_18346  
UGUAGGUCCAUGAUUAUUCUGACAGAU  
>piR\_pseudo\_21225  
UACGUUAAUUGCCAUGAUUUGUUUAUCCC  
>piR\_pseudo\_7807  
UCCCCGGCUUUCGCAGACCGUUCCAUGA  
>piR\_pseudo\_126  
AGAUUUUUCUUACUUAUUCGAGGCUAUGC  
>piR\_pseudo\_27462  
AUGUGGAUUUGGGCGUGUAAAAACGCGA  
>piR\_pseudo\_21858  
AUAAGUAGCAAUAAACUCAUCCAAGGUUAU  
>piR\_pseudo\_27249  
UAACUUUAUCCGAGGUUAGUACUGCUUAA  
>piR\_pseudo\_15705  
GAGACCGAACAGGCUCUAAUUUUUAUAGA  
>piR\_pseudo\_20442  
AGUGUCCCUACCUACUGUUAUGUGGACU  
>piR\_pseudo\_6908  
AAUAUCUUCUUUUGGUAGUGGUUCCAAAU  
>piR\_pseudo\_12680  
CAGUAUAUCAGGGCUUUUAAAUAACGAUA  
>piR\_pseudo\_23985  
GGAUUUAUGUUGACCGUUCUGCAAUCUG  
>piR\_pseudo\_15638  
CAGUAUCGUGUGAGACAGCCGAGGCUCUC  
>piR\_pseudo\_13333  
UACCUCGGGUGGUAACCUUAUUAUUGCGG  
>piR\_pseudo\_20886  
UAUAUUGUAAAAGAUGUGUUUGCGAAUGGC  
>piR\_pseudo\_18392

ACCGCCUAAAGCACGUUAUGCGCACCUC  
>piR\_pseudo\_297  
CCGAGUACAUGUAUUAUUAUGCGGUCAUG  
>piR\_pseudo\_24615  
GGAUUCAUUUGGACGAGUAUACAUCAUC  
>piR\_pseudo\_14936  
GGCAACUUUCGGCCACGGGAUGAUCGCG  
>piR\_pseudo\_25268  
CCUUUGUUAAGCCAAUAAAUAUCCAUCA  
>piR\_pseudo\_19539  
UAUUCAUAUUACUGAAAAAGAUGCGAAGC  
>piR\_pseudo\_18619  
AGAAGAAACAAGUUCACGGACACGAUCGA  
>piR\_pseudo\_23516  
UAAUCAUUUUAGAAGAAUCAAAUUUAUU  
>piR\_pseudo\_25219  
GCGAUGUGCCCGUCCCCGCUUCCGAGGCU  
>piR\_pseudo\_3310  
UGUGGGAUUCGGGAUUGCCCCUGUGCUU  
>piR\_pseudo\_23248  
AUUGGCUUCAGGAUGUAAAAGUAUUGGGU  
>piR\_pseudo\_15808  
CAUCGAGCCUACGUAACUCAAAUGGCUAC  
>piR\_pseudo\_23598  
GAGUAUCAGAGUUCUGGGCCUUUCAAGA  
>piR\_pseudo\_24336  
UGCACUCUCGGGACAUAAACGUUAUUAUGG  
>piR\_pseudo\_5627  
UGCACCUUUUCCUGGACCGGCAUGCUG  
>piR\_pseudo\_26580  
UUGAGAAAUGCCUAAGGCGUAUCAUUGCU  
>piR\_pseudo\_3644  
AAACAUUUAAAACACGACGUAGACAGGUU  
>piR\_pseudo\_23709  
GAGACUGGAAUUUAUGAUCUAACGGAUUG  
>piR\_pseudo\_2218  
CUCAGCCACACGCGGGAGCCGAUGCAUUU  
>piR\_pseudo\_21974  
CUAUGUACCUACAUAAGGUAAUAAUUGUC  
>piR\_pseudo\_16490  
ACACUGUACAGAUUAUUGACUUCGGGCAC  
>piR\_pseudo\_13257  
UGUGACGUGUAAAGUUACGAGGUUCGAA  
>piR\_pseudo\_19712



AUAAUCUCCAUAUGGUUGCACUAAUUGG  
>piR\_pseudo\_23315  
GUGCGGCGAGAGUGUAGCUGCUAGAUGGA  
>piR\_pseudo\_12789  
UGGUAAUAAAAGCUUGGGUCCCUUCUCGA  
>piR\_pseudo\_22561  
UGGCUCACCAACAGAUGGGACAAGCGGUC  
>piR\_pseudo\_9374  
ACGCACAACCUCUGCAGGUCUAGUUGUUG  
>piR\_pseudo\_7169  
CAUUGUCACCCAGUCGCCUUUACAUUGUA  
>piR\_pseudo\_20614  
GUGGACAAGGCGAGAUCGCUUGUCAAGAA  
>piR\_pseudo\_21357  
UGGCUCUUUGUGUGAAAGGUCUUAUGUUA  
>piR\_pseudo\_24355  
UGCGAAAUUGAUUGCCUGCGUAUUUACGU  
>piR\_pseudo\_17261  
UUAAAGGCUGUUGAAUCAAAAAGUUAGCGA  
>piR\_pseudo\_17920  
UUCUCCCGUUUCUAGGACGCGUGCCCUCC  
>piR\_pseudo\_18316  
UGUAUUCGGAAGGACUCAAUACUAAUCAU  
>piR\_pseudo\_14488  
CCAACCUCUUGUUUGGUUUAGAUGGUAGU  
>piR\_pseudo\_16370  
GGCCUCUUUAUAGCCAUUGUCGAACCUAA  
>piR\_pseudo\_4045  
UCGACUAUAUAAUCAACGUGUAUAAAAU  
>piR\_pseudo\_27681  
UUCGAAACGUUCGCAAUAGCGAAUGUUAU  
>piR\_pseudo\_9458  
UAACCGUAAAUGGAGGACCGCUCACGCCU  
>piR\_pseudo\_19474  
UAGUAAUCCCGAAGUGCUAUUAAAGACGG  
>piR\_pseudo\_25392  
UUUUCACGGUAUCGAUUCUGACUAAUUUA  
>piR\_pseudo\_23965  
AUUAGCAAGCGCUCUACUCAUGUGGCCAU  
>piR\_pseudo\_105  
AUUUAAUAGUACAAGACGAGGGUCUGUUU  
>piR\_pseudo\_17029  
UGGUAAUGGGCGCAUGGUAGGCAAUAGUC  
>piR\_pseudo\_21255

GGGCUAUCCCCUCAGUUCGCGGGACUGA  
>piR\_pseudo\_26368  
UUAGAAUGGUUUUGGAUGGACUAUUCGUA  
>piR\_pseudo\_20759  
CUCGCGGCUACCCCGCUCGUAGGUUGUC  
>piR\_pseudo\_3889  
ACUGGCCAGAAAUGGAGACUGUAGGGAUU  
>piR\_pseudo\_3906  
GUCCGUGAGUGGCGCUGAGUAUAGUUAUA  
>piR\_pseudo\_1862  
CCCUAUGGUAAUGAAUUGUUUGUCGAAAA  
>piR\_pseudo\_25291  
UGUUGACUCGGGAACCCGGUCACGCUCUA  
>piR\_pseudo\_22400  
UGAUGUUCACACAAGGGGAGUAUUGGCG  
>piR\_pseudo\_1808  
UAUGCCCCGGGCCUUUCUGGCUUGAAU  
>piR\_pseudo\_15351  
GAGCUUCGCAUAUGUUCGAGGACUAAUUG  
>piR\_pseudo\_8882  
CAUGUAACAACUAAACCUUUUUGGAUGUG  
>piR\_pseudo\_17580  
AGCUGCAAGAAGGGGGUCGGCCUUUUGGG  
>piR\_pseudo\_16408  
ACUGAGUUUCGCGAAUCCUCCUUUCUGGU  
>piR\_pseudo\_9204  
GAGCCCCAGUCACAUCCGGCCGUGGGACG  
>piR\_pseudo\_118  
GGUCAGACGCUAACACGGACUUGUUUCUA  
>piR\_pseudo\_12901  
GGAUGGUGAUUGCCAAGGUCAUGCCAAAA  
>piR\_pseudo\_20542  
GAAUGCCGACCAGCCGUUGGUCUCCCCAG  
>piR\_pseudo\_883  
UUGACACAGCCAAGUAAUGUCUUGUGCAU  
>piR\_pseudo\_25832  
CGGUGUGAGCCCCGUGGCCUGCGGAAUAU  
>piR\_pseudo\_26574  
CGCGGAAGAUUGAUUAGUCUUAACCGCG  
>piR\_pseudo\_12109  
CAAUUUAGUCAGAGUAUUUAUUAUUAUA  
>piR\_pseudo\_8556  
ACACAGUGCGUUUCUAUCAGAUCUACAC  
>piR\_pseudo\_21777

UCCAAUUUUAAACCUCUCUAAUUCGACGU  
>piR\_pseudo\_343  
AGAGAAUCCUAGAGCCCCGAGGCGCAUG  
>piR\_pseudo\_20709  
GAUAUUAUCGAAAUUUGGCUUCCAGAU  
>piR\_pseudo\_8372  
AAUACGGAAGUACCUAUCUUAUAGAGAGA  
>piR\_pseudo\_12137  
GGGCGGCGCGUCGGUAGCGCCAACGUCGC  
>piR\_pseudo\_4930  
GUGGAGGUUCCUCUUGAAUGGACCCUGUC  
>piR\_pseudo\_14066  
UAGUUCUAUUGACGCAGUUGUCGUCGAGG  
>piR\_pseudo\_15585  
CCGUAACCAGGUUUGAGAAGCAACAUUUC  
>piR\_pseudo\_17446  
ACUAUCGGUCUAUCGACGCUGGUGUGUUG  
>piR\_pseudo\_15668  
UAAGACACUGAAUUCGCCAGCACAGUGUU  
>piR\_pseudo\_10058  
UUUGAUUUGACUAAAGACUGAGACCAAGA  
>piR\_pseudo\_2848  
AGGUGGCAUUGUUUGUCGGCCAGCCAUA  
>piR\_pseudo\_3849  
GUCAAUCUCCUCCGACCGAGCUCAGUAAG  
>piR\_pseudo\_14472  
UUAUUGGAUAUUCAAGUUUAUUCUGUAAU  
>piR\_pseudo\_25950  
GCGAUUAUUCUGACGUCCGGGCCGAGUU  
>piR\_pseudo\_21088  
UUUCGGCAUACGCCUUGGCUGUGUUAUCC  
>piR\_pseudo\_7674  
UAGUCUACGGACUUGUCCCUUGGGGCGUA  
>piR\_pseudo\_10550  
CUCGAUUCAAGUUGUGUGUAUCGAAUUU  
>piR\_pseudo\_22898  
UAAGAACUUUCUGUUGGGCCUACGCUGUA  
>piR\_pseudo\_2784  
AAUUUCCAUUCAGGCAACCGCGACGGUG  
>piR\_pseudo\_22029  
UAUGUCAUUGUAAGAUUACUUUUUUCGC  
>piR\_pseudo\_23034  
GAGCAGCUAUGAUUAAUAUCUACCGAAAA  
>piR\_pseudo\_16571

UGGCAAGCAACGUCUUUUGGCCUACGUC  
>piR\_pseudo\_6712  
AGCGUAAAUGUUAUGUUAGGGACUGAUA  
>piR\_pseudo\_8425  
CAGGUAAAUGUUGCAGCAUUAUCUUAACU  
>piR\_pseudo\_6569  
UGAUUUAGUGAUCCAGACUGUCUCCCGAC  
>piR\_pseudo\_3207  
UUGUUUAUAGAUGAAUUGAUUGGUGAGGCC  
>piR\_pseudo\_19343  
CGUUCUCUGAUUAUCCAGGAACUGAGUCA  
>piR\_pseudo\_18013  
AGCUAAUCAAUUUAUGCUGAUGUGGUAUU  
>piR\_pseudo\_17793  
ACGAAUGUACCGAUACGUAGGAAGGUGUG  
>piR\_pseudo\_23019  
ACCUGCGGCAAAGCUAUUGUGUGAGUCGG  
>piR\_pseudo\_13566  
AUAUAUACUAAAAAGAUUAAUUAUAAGG  
>piR\_pseudo\_21139  
CUGUACAUAAGAGGUAAUGUCAAAUAUAA  
>piR\_pseudo\_26363  
UGUCCAGCCUCCCCUUUCCCGGAGGGUU  
>piR\_pseudo\_27231  
UUUACGAAAGACUGUUGUUUCUGUGACUU  
>piR\_pseudo\_23094  
AUGCCACUCGUGUAAUUUGUGUUUAAAA  
>piR\_pseudo\_12509  
GAUCGUUAGUAUUUAACCAGAUGAGCGGA  
>piR\_pseudo\_725  
GACUUAGGAGAUACCCAUACGUCCAGUUG  
>piR\_pseudo\_7857  
UCCGUAAAUGUAGUACAUCAUUCUUCU  
>piR\_pseudo\_14526  
AUGCCACAUAAGAUCCGAAUUAUGCGAAC  
>piR\_pseudo\_22704  
AAGCUUUAACCGUAAAACUAGAACUAGU  
>piR\_pseudo\_26282  
GGAUACUUUACUCGAAUUAACCGAAAAUG  
>piR\_pseudo\_19061  
GCUACUCCAAUGCGAGCACAGGGCGUGUG  
>piR\_pseudo\_24869  
UAGAGAGUCCACUUAGUCUAAAACUGAA  
>piR\_pseudo\_16231

GCAAUAGCUACCACAUACCACUGUUUCUU  
>piR\_pseudo\_14109  
AUAUAUAGGGGUUAUGUGAGACAUAU  
>piR\_pseudo\_16028  
UCCCAAUCUUAUAUGGUUCAUAUAUG  
>piR\_pseudo\_27324  
AAAUGUCUUUGUGUCCAGACUAUACUAGC  
>piR\_pseudo\_14261  
GAUGCUUCUAUGAUAAGGUUGGAGGAUUG  
>piR\_pseudo\_9943  
AGGUCGACGCCCAUUUGUUCACCUACCUG  
>piR\_pseudo\_13420  
UCGGGUGGAGUACGUCCAGAGACACUAAA  
>piR\_pseudo\_19418  
UUCACGCUCUGGCGCGAUACCUGUCCGGA  
>piR\_pseudo\_25119  
CUUUGCCGUGACCAUAUGGUCUUAACUGA  
>piR\_pseudo\_17154  
UGGUUUGACGUGUAUAUGAGCUCUUAAGU  
>piR\_pseudo\_829  
GCAGUAUUGUGCGCCGAAUCAGUUAGCAC  
>piR\_pseudo\_10151  
AAGCCACUCGAUUGGGUGUUAAAUCGGUC  
>piR\_pseudo\_14622  
GUUUUAUCCGCAGUCGUCAGGCAUGCCAG  
>piR\_pseudo\_16294  
CGGGUCGACCGAUAUGCCAGCAGCUGGAU  
>piR\_pseudo\_18023  
ACUGGUUCCCUGAAGAAACCGAAAACCU  
>piR\_pseudo\_13592  
CGAAAGAUUAAGUCGACUCCAGAAAUGA  
>piR\_pseudo\_2449  
UUUUGCGCGUCAAAUUAACGUAUCGGGUAU  
>piR\_pseudo\_3248  
AACCCACUAUUGACUACUUUAUUCUUUGU  
>piR\_pseudo\_24138  
AAACUUAUACGGUACCAUAUGACAAACCU  
>piR\_pseudo\_2751  
AAAGAUGAAGAUUUCGUUGGUACGAGUGA  
>piR\_pseudo\_19226  
UCUAGCGUUUAGGCGGUCCGGCCCUUGGC  
>piR\_pseudo\_6647  
CUCGAUAAACUUCUAGUAGCUCGUAGAAG  
>piR\_pseudo\_124

CUUACCGACAGAAUUACUGGUCAGCCAUU  
>piR\_pseudo\_17647  
AAGUUUGUGGUUGCCCUGUCGAAGCGAGA  
>piR\_pseudo\_9245  
AGUCAACCGUCACUGAACACUCUAGUUAA  
>piR\_pseudo\_340  
ACUAACACCAAUCUUCGCGUACGAGCUCA  
>piR\_pseudo\_15648  
ACAGCGGUUAGUUCUGUGCGGGUGCUGAA  
>piR\_pseudo\_19209  
GUUGCCCAAGACGGCUAAUAUUACGAGUA  
>piR\_pseudo\_9477  
GAAGGUGACCCAGCUGACCUGCUCAGUCU  
>piR\_pseudo\_546  
UAUAACAAAAAGCAAACUAAGGGGAAAGG  
>piR\_pseudo\_12509  
UUA AUGGCAAUGCUGUUGACUGCAGUUUU  
>piR\_pseudo\_22196  
UUGGCCUGUCGCCUUAUGUCACGGCAUU  
>piR\_pseudo\_18075  
GUGGGUGGAAAGCCUGGUUUCGAACCCGA  
>piR\_pseudo\_8087  
GACUCUUCGAACGUAGUAAUCAUAAUGA  
>piR\_pseudo\_21331  
GAACCUCAUUGAGCCGCUUCGUGUUCAC  
>piR\_pseudo\_25870  
AGCAGGUAAGGGCCUGAUGGCGGAUGGCG  
>piR\_pseudo\_26169  
CCAGUGGCAAGCUCUUUAUGAAGGUCUGG  
>piR\_pseudo\_25239  
AGCUUAGGACAUAACCUGGGUUAGGCCAA  
>piR\_pseudo\_3682  
GUGUCCCAAACGCUGGUUGGUGGGAUGUA  
>piR\_pseudo\_14046  
UGAGAAGGAGUUAGACGCCUAACUCAGAC  
>piR\_pseudo\_19713  
UCUUCACAGAUUAUCAUACUAUUAGUGGGA  
>piR\_pseudo\_14140  
CCCCGCACCCGCGACGUGCGGGUCCGACU  
>piR\_pseudo\_23293  
UAGCAGUCGACGGCAUUCGUCCCUACAAU  
>piR\_pseudo\_22605  
CAUAGUGCGGAGCCAAAUCUUAUCGAAUA  
>piR\_pseudo\_21512

UGCAUUAUAGCCGGCUACCGCCCCGUG  
>piR\_pseudo\_9563  
GGCGUGACUAUCGGGCCAAGUUUCUAUUA  
>piR\_pseudo\_3005  
AGAAUACGACGAGUAAUAUAAAAGAAGCG  
>piR\_pseudo\_22498  
AUUAUAAUUUUCGGCGUUUUUGGUGGUGG  
>piR\_pseudo\_24352  
GUGUUUCUAAGCGGAUACGUGUCGUUUGG  
>piR\_pseudo\_2963  
GAUUCGCUGUGUGCUCGCCUACUCCGCCA  
>piR\_pseudo\_1329  
CACGUGUCCUCCGUCACUUAUUUAUUUA  
>piR\_pseudo\_2805  
UUAGGUCCGAAAAACAAUAAAGAAAGAU  
>piR\_pseudo\_12493  
CGAUAGGCAAGCGAAUAGCAGGGAGGAAU  
>piR\_pseudo\_14736  
CGGGAAACUGUCCGAUACCGUUAAGUCUG  
>piR\_pseudo\_18122  
UACUGGUCAGGCAUCUGUUAGAAUGGGGG  
>piR\_pseudo\_17132  
GUGAUGAAUAUAAUUUUCAUUUAUUGC  
>piR\_pseudo\_20243  
UAGAUGCCUUAUAGACGAUACAGGGCGUC  
>piR\_pseudo\_15329  
CGAUCACGGACGAACUGGGGUCCGGUUCA  
>piR\_pseudo\_25323  
GCACUGGCACCCCGGCUCGGGCGGGUCGC  
>piR\_pseudo\_1164  
AUCUGUAUCACAGCGUGCGUCCCGUACAA  
>piR\_pseudo\_9339  
AGGGAUCCUGUGUUGAGCAAUGUCCCAA  
>piR\_pseudo\_12666  
UUCUAUAGGUUGAGGACGUUUUUAUAGAA  
>piR\_pseudo\_11453  
CAGACCAGUAGUGAGCGGACGACUGUGCG  
>piR\_pseudo\_22735  
UUUGUGUGCUCGUCUCUGCGGAAGCUCUU  
>piR\_pseudo\_8289  
UGUGGUGAUGUAGGGUGGAUCACUAUGUA  
>piR\_pseudo\_4723  
GUUUACAUCAGGUUGCGUGUGUAGCACCU  
>piR\_pseudo\_17825

AUGAUACGUAUAUGUUGGUUAAAUUGAUU  
>piR\_pseudo\_22491  
CCAGGUCGUUAGAAAUUACGAACCUCGC  
>piR\_pseudo\_297  
GUCCUCAGUUUGGGCGUAGGGGUAAACU  
>piR\_pseudo\_21481  
AAAAGGCUGAUUAAAUCUGACAACCUAUG  
>piR\_pseudo\_11590  
CUAGGAUCACUAGGACCUUUUAAGUACGU  
>piR\_pseudo\_26850  
UGCUAUACAUAUAGACCGAGUAUGUGAAU  
>piR\_pseudo\_25309  
GUUCGCAGGACCAAGGUGCGAGCGUCCCC  
>piR\_pseudo\_6988  
ACACAAACUAGCAAAGUGUGAAAGCAAGU  
>piR\_pseudo\_13524  
AUUAAAUAUAUAAAUAAGCCUAGCUUAA  
>piR\_pseudo\_12733  
ACUGCAUUCAGCGUCUAACCGAGGAUUGG  
>piR\_pseudo\_25705  
AACUACCAUCGGCGGUGACCGAAUCUAUU  
>piR\_pseudo\_6639  
CUGAAAAAUGUAACGAUCGCAUUAGUUGU  
>piR\_pseudo\_13116  
AGUUGUCAGGGGACAUUAUAGUGGACAUU  
>piR\_pseudo\_27082  
GCACUCAAUUAGCGUUUGAGGGCUCCGAG  
>piR\_pseudo\_6143  
CGCAUCUAUUGCCUACAUAUCGUGAU  
>piR\_pseudo\_11822  
UAGGGUUCACCGGUACAUGGCCUUAUCGG  
>piR\_pseudo\_2574  
UCCCCUCCGACCAAGGUGAGCUUUCACAU  
>piR\_pseudo\_13040  
GAAGUUGCAAUAGAUAGUGAGUAUUUAUC  
>piR\_pseudo\_1168  
GGUUCUGAACAAAGUAAGAAUACGUGCAGC  
>piR\_pseudo\_12021  
GGAGCGCGUAGGAACUCAUCUAUGAGGA  
>piR\_pseudo\_20448  
CCGGGAGGAGAGAAUCUACUAAAAGGCGU  
>piR\_pseudo\_13183  
UGCCAACCUAGCAUGCACUUUCGUCUGCG  
>piR\_pseudo\_9747



UAAGGCAAUAUAUUUAAAAAUCGUAUU  
>piR\_pseudo\_6499  
CAUUUGGAAACAUAUUUAUCAUAACCAGG  
>piR\_pseudo\_18151  
AGGUGUUGACGGACGUCCGGUCUUGGGUC  
>piR\_pseudo\_23148  
CUGGAGCUUGUCCAUGUAAAGGCCACAAG  
>piR\_pseudo\_20970  
CGAUCUCGUAAGUAUGCACACAGUUUGU  
>piR\_pseudo\_15393  
GCCCUAUUCCAUUUCUUCUAGUUCAGGUG  
>piR\_pseudo\_17026  
UCCAGUGAAUGCGCCGGGAUGGGCUCGCG  
>piR\_pseudo\_24245  
GAGGCACAAUCAGGGGUCGAGGCGCCGCU  
>piR\_pseudo\_437  
CGUACACAUGAUUUACAAGAUAUGUCAC  
>piR\_pseudo\_2627  
CUAAACUUAGAAAUACAAUGUGUGGACCA  
>piR\_pseudo\_3506  
UGCUGCGCUAACAGGCCUCAUCCGAAA  
>piR\_pseudo\_19761  
CGGGGUACUGCCUCCACCUACGUGAGGAA  
>piR\_pseudo\_10306  
GUGUUGCUGGUGUUACCUUUGGCAUGAAA  
>piR\_pseudo\_27305  
AUUAUCGUUCAUCUUGAGAAGAUUCCUA  
>piR\_pseudo\_1  
ACGGAGCCCAGACUACGGCCAUUUAGCCC  
>piR\_pseudo\_14000  
GGCUCGAAGAAAUGCCGAUUUCUAGCGG  
>piR\_pseudo\_23741  
UGAAUGUGAGUGGCCUUUCCUUGACAAGG  
>piR\_pseudo\_13247  
UAACCUGAAACUUAUUCUCAGUUUAAAUA  
>piR\_pseudo\_7379  
CAAAGAUCGGCGAAGUCACGGUGUAUACG  
>piR\_pseudo\_3305  
AGUAACUAAUCCUAGUCUAUGGUUUUUAUC  
>piR\_pseudo\_27007  
AUUAUUCGCCUUAUCUAUAUGGUUAAGUA  
>piR\_pseudo\_396  
GCAAAAACCAUAGCUUGGGUAUCAUGAUA  
>piR\_pseudo\_19472

GGUAUCAUCCUAUCGUUUAGUGACAUG  
>piR\_pseudo\_8418  
CCACGCUCCCGUCGAUCGUUUCGGGGCG  
>piR\_pseudo\_22758  
CCGGUAGCACCGUAUCGUUUGGAUAAUU  
>piR\_pseudo\_25634  
UGGUGCUGCGAAGUCUCAGUUUGUAAA  
>piR\_pseudo\_15113  
ACACGCCGUAGAUAUAGUUUGUUAUG  
>piR\_pseudo\_3371  
CUGCGUAUGGCACUUAGCGCACGGAGCGA  
>piR\_pseudo\_9846  
AAUAUGCGUGAGCUCCCGAUCUGGGGUAU  
>piR\_pseudo\_9879  
UCAUAACUUCUACUUAGUAACUAUCCUA  
>piR\_pseudo\_24155  
GUCCCGUCAAGUAAAUACCCAUCCACUG  
>piR\_pseudo\_11956  
GGUUGUGGCGAUUAGCAUAGGAUCGAGGU  
>piR\_pseudo\_15394  
GUUGGAUGCUAGGAGCCAGAAGACAUACG  
>piR\_pseudo\_3465  
GCACACCCAGGCUCCAGUCAUACAUCGGG  
>piR\_pseudo\_23008  
UGUAAUCAACAAGAGAGUUCAGUUUUGUC  
>piR\_pseudo\_129  
CAGAUUGGCUGGACGCGUAGGCCGACUUU  
>piR\_pseudo\_22835  
CCGCUCUUUAUCUAUCUGAUUGCUCUCUC  
>piR\_pseudo\_17164  
UAAGCGAUUUGACGAUGACGAUGUACUAA  
>piR\_pseudo\_17646  
UAUUUCUGGUUGAUGAUCGUUUACGUGCU  
>piR\_pseudo\_27033  
UUCUUCUCUCUUUGGUAUACAGUUCGCU  
>piR\_pseudo\_22524  
UGGGUAACUAAUGCUUUUAAUACCUGUG  
>piR\_pseudo\_24961  
CUGGUUGAAACUACUCUCACCAAUUGGAG  
>piR\_pseudo\_255  
GUAGGAGGGUUUGGCACGACUCGUACGGG  
>piR\_pseudo\_13337  
GACGUAAAUCAAACUACCUUUAGUGGAG  
>piR\_pseudo\_19107

GGUGUACUAAUGUUUAUUGGUCAGAUAGGC  
>piR\_pseudo\_15261  
CGGCAAAGGCAGCUAGUAUACUUUUAAUG  
>piR\_pseudo\_20911  
CCAUUCCCAUGGCGCAUCCUUCGGCUUGA  
>piR\_pseudo\_23116  
UCUUCACCUUUGAUAAAGAAUUGUUUUGGU  
>piR\_pseudo\_16442  
UCUCUACCCUCGUGCGACCAGGGCGCCCC  
>piR\_pseudo\_8536  
UGCUAUGGUUGGUAAGAGGUUACUUGCGU  
>piR\_pseudo\_23843  
UAAUCUCGUAUGUAGCAAGGCAUUUUACU  
>piR\_pseudo\_23976  
AUGCGAAUGCAUGGACUUGAUCCAAAACC  
>piR\_pseudo\_9604  
CCUGUUCGAAUCCGCGUUGGAUGCUUGG  
>piR\_pseudo\_1317  
ACGCACCCGGAAGGAUCAGCCGCCACAUI  
>piR\_pseudo\_16860  
AGAGAUGCCCGUUCUACGAAGCAAUAACA  
>piR\_pseudo\_20760  
UUUUCGCACAAGCGGAGGUGUAGGAGUUG  
>piR\_pseudo\_7661  
GUUGCAUUUUUUCAGAAAAUGUCCUAU  
>piR\_pseudo\_22839  
GCGUUUCACCCAAGCUGGAUUGAAGUCUG  
>piR\_pseudo\_19743  
CAGUGGAUGCUGAAAUGUCCGUUGUUUGU  
>piR\_pseudo\_15524  
AGAGGGCACGGGUUCGGUAAAUUCAGAU  
>piR\_pseudo\_642  
CAGGGGUGUAAACAGUAAUUGGAGAGACAG  
>piR\_pseudo\_11471  
AAAUACUGCUCCUAAUUUUUCUGUUGUUA  
>piR\_pseudo\_22083  
GUCUCUUCGGAACUCUAUGUUGCAGUGGG  
>piR\_pseudo\_23539  
GGCUAUCGGAUCGGGAUCAGCUGACCGG  
>piR\_pseudo\_20520  
CAGAGAUAGUGCAGAUGGUGUACCCGAAG  
>piR\_pseudo\_10130  
AGGUCCCAAUCGAAAACGUUUUUUUAAAC  
>piR\_pseudo\_20191

CGGGCUAGAACUAUCAAGCUGGUCUUAAC  
>piR\_pseudo\_23555  
AGCCUCUUAAGUACAAAACCGGCUGCCUU  
>piR\_pseudo\_13747  
UAAUAUAAUCCAGGUCGAUUCGCAGUAU  
>piR\_pseudo\_22309  
UUACUAAUCCUCAUUAUAGUUUUUAACCG  
>piR\_pseudo\_23621  
AGCGUCCAUAUUGAAUUGCAGGAUU  
>piR\_pseudo\_9709  
ACGGCUUAGGGUCCGCGGCGGAAGAUUC  
>piR\_pseudo\_5067  
ACCGACCGAUGCCUGCUUAUUUCGUAGAG  
>piR\_pseudo\_26933  
GAUAAGGGAAGUCAUUCAGGAAUGUUA  
>piR\_pseudo\_13562  
GCCUGAGGAUUUCUAGUCCUUGGUUAUA  
>piR\_pseudo\_9811  
UUGUAAAUUUCUCUGUACAUAUAAGAUU  
>piR\_pseudo\_20388  
CGACUCCACCUGUAGCACGCGCAGCAG  
>piR\_pseudo\_23190  
GAUAUUAUGCCGGUGGAAGUUAUCUCCCC  
>piR\_pseudo\_1150  
UGUUGAUCGUUCUAGACACUGCUCUUGU  
>piR\_pseudo\_571  
AGAACAAAAGAUUACGUUUGUACGUUGUU  
>piR\_pseudo\_8051  
UGUUGUUUUGUCGGCAGCACUUGUUACC  
>piR\_pseudo\_13691  
UCGAUUAUAUGGCAAAGAAUGUACUAGG  
>piR\_pseudo\_8782  
UUUAUUUGUCGCCAAUAUCCUGUGUCCAU  
>piR\_pseudo\_13441  
CGGGCUGCUGGUGCUAUAACGCCGUCGGG  
>piR\_pseudo\_15127  
ACUAAUGGUUUUUUUACGUCUGUAAAAA  
>piR\_pseudo\_21787  
UGGGGUCCUGUAGGCCUUGCGUCCCCGUC  
>piR\_pseudo\_9762  
GCAAUUCGAGGCGGACCUAACACCGGCAG  
>piR\_pseudo\_18561  
UGAUUGUAUUUGUGAUUACUUUAUACUG  
>piR\_pseudo\_11328

UCGUAACUACUACAUGGAUCCUGCAUCAA  
>piR\_pseudo\_25123  
AGCGAGGUAAAAUCCGUCUCACCUAGAUC  
>piR\_pseudo\_22050  
UUCUCGGGAGUUUCCAGUAUAACUGGUU  
>piR\_pseudo\_25836  
UGUGUUGCCUGCUCUAACGAGGUGUACCU  
>piR\_pseudo\_17090  
UCGGACGACUAGUUUUAUAAGACCGGUU  
>piR\_pseudo\_7918  
AGUGAUAGCCGUACCGAAACCACCCUCGU  
>piR\_pseudo\_24913  
AAAAUAUGUUCGGCCAGAUCGCAUCUUUGA  
>piR\_pseudo\_486  
GCCUAGGGCGGUUACUUCUGGCCCUUAAGU  
>piR\_pseudo\_12077  
UUAGUAGCUACUUUAUGACUGUCGUCCC  
>piR\_pseudo\_19464  
AUUGCUUUAUUCGAUGGACCAGCAGGUUU  
>piR\_pseudo\_21469  
GUUGUUAUUUUUAAGUCUUUCAGGGUACA  
>piR\_pseudo\_17676  
AAGUGCUUGGCAUCCUCCGUCGUAGUACU  
>piR\_pseudo\_10423  
UGCGAACUCAUAUAACGGAUGAUAAUUGA  
>piR\_pseudo\_25173  
GCUAGUGGGGUGCUUAAGGCAGCACCAAUC  
>piR\_pseudo\_14363  
UUUUGUUGCACAAUGAUUUCCGACGCUUU  
>piR\_pseudo\_11958  
GCCCAGUCGCGGGGGGACUGCGUCGAGGCA  
>piR\_pseudo\_26409  
CGCUGAUUCAGUCAUGCCGGGUCGUGAGGA  
>piR\_pseudo\_12682  
AGGUCACUUCCGUCUGUUACGACACUCUU  
>piR\_pseudo\_721  
GUUAUAUUUAGCUAAUAGAAGACAGACUGA  
>piR\_pseudo\_8047  
CUACAGGUAAUUCUAUUAUGAAGAUCUCC  
>piR\_pseudo\_15916  
GAACUGCCGGGCCUGAUUAGAGGCAUAUUC  
>piR\_pseudo\_11317  
UGUAGCAGUGUAUGUCUUAGCGAUAGAAUU  
>piR\_pseudo\_14518

CAGCGGAUGGGGACCAGGGGCGACCGUGGG  
>piR\_pseudo\_13536  
GCAGUUUUUACUAAAACCACCUGGUAGGUC  
>piR\_pseudo\_6656  
UGUUUCGCUAAGUCUAUUAGCUACUGAGCG  
>piR\_pseudo\_12616  
UCAAGUCAUUCUAAUAUAUCCUGCAAGGC  
>piR\_pseudo\_19691  
GGUUAGUGUAAAUAUUUGGAUGGAAAUCGU  
>piR\_pseudo\_25342  
GCAAGUAAAUAACUUGACUUUACGAAGU  
>piR\_pseudo\_25912  
ACUAGCGUGUGACGCCAUGCAUCGUAAUGC  
>piR\_pseudo\_415  
AUGUAAGUUAACUCUUUGCUUAUAUCAGAG  
>piR\_pseudo\_3727  
GCUUCUAAAACUAUUGGUGAUAAUCAACU  
>piR\_pseudo\_369  
AUCGCAAUUUUUGGCAGUAGCCUUCGUAA  
>piR\_pseudo\_27578  
UAGUGUGGGACACUCAUCAGACAGAACAAC  
>piR\_pseudo\_19414  
UGAGGGUUGGGGGCGUAGGCUAUCCAUC  
>piR\_pseudo\_21311  
UGGCCGAUGGACGUGGCGCCGCGGGUCGC  
>piR\_pseudo\_13064  
AACAGUCCUAGAAUAAGGCAAAUAUACCUA  
>piR\_pseudo\_1240  
UCUGAUCGUAUGACAAAUAUUUGUCCUCU  
>piR\_pseudo\_1251  
AGUUCAUCUAGAUUGCACGUUUUCGAGUCU  
>piR\_pseudo\_5249  
UGACAGACUCAACCAUACUAGAAACGAUGU  
>piR\_pseudo\_16908  
GCCAUUUUAAUACUCUGGACUGGCAAUUAC  
>piR\_pseudo\_15267  
UGGUAAUAAUUGGCCUCCUGUCCUUACGUA  
>piR\_pseudo\_25362  
CCCCGCAGCUUCGUGUGCGGAGCGCGAUC  
>piR\_pseudo\_23878  
UGCACGGAGACAUGCUGCUAAUGCCCCCU  
>piR\_pseudo\_14136  
UUUGUUAGAAAGAACAUAUCCUAGCUCUCAA  
>piR\_pseudo\_26758

GUGGCUGAAGCGGCGGCCCCUCCACGUGC  
>piR\_pseudo\_19316  
AGGCAGGCAUGGUCGUACUACUGACUCCCC  
>piR\_pseudo\_23256  
GGAAUGUUAGGGUGUUUGUACAUUCUCACA  
>piR\_pseudo\_22631  
GAUAAUAUGUAUUAUAGGCGUGGUCUCAA  
>piR\_pseudo\_24991  
GAUUACCCAGAUGGGGGGAUGUCUGUCAUA  
>piR\_pseudo\_20400  
GAAGGUGGCACAUGCAGCGCCUAGAGUCUU  
>piR\_pseudo\_2459  
GCCGUACGCGGUGGAUCAACCCUGUUUGGU  
>piR\_pseudo\_9693  
CGUACUCACUUUUGUUUGAGGUGGGAGCGA  
>piR\_pseudo\_18613  
GACAUGUCGAGUGGCUCGAAAUUAACGU  
>piR\_pseudo\_18001  
GCAUGUAAAGGAGCAUUAGUAGCGUUGCCG  
>piR\_pseudo\_2099  
UAUUCUGAAGUCGUCCCGAUAAUUUAAUGC  
>piR\_pseudo\_13704  
UCUUAGUCUAAAGCGCAUGUUGGUCGGUUA  
>piR\_pseudo\_20449  
AACGUACUGAGCCAGCUCAUGUAGCUUCGA  
>piR\_pseudo\_25768  
CACGCGCGCCUGGCCCCGCGGGAUCGUGC  
>piR\_pseudo\_21375  
ACAGUCUUAUAGCAUGCAGACCUACUCGU  
>piR\_pseudo\_23496  
GCUCAAAACUUAUCAAGGCCAAGAUACGCA  
>piR\_pseudo\_19478  
CAAAAGUGGGAGUUAGACAAGCCUUGGCUU  
>piR\_pseudo\_6433  
UCUACUGUUCUCAUGAGUGAUUUGUGACGA  
>piR\_pseudo\_24030  
GCAUAAUUACCUUAAGAGAAUACUUUACAG  
>piR\_pseudo\_16721  
UAUCAAGUCGUCAGAAGAUUAUAUGGUAUA  
>piR\_pseudo\_19539  
AGACAGAGUAGUAGGUACCCUCUUAGUAAU  
>piR\_pseudo\_2081  
AAACUGAUUGCAGCCCAUCACUGCGAUGGA  
>piR\_pseudo\_5517

CUUGUAUAGACAU AUCUCUACUACAGUCCC  
>piR\_pseudo\_16502  
AGUAGUUAAGGUUCAGCAAGGCAUUUUCAU  
>piR\_pseudo\_11358  
GUAGGUAGACAAUGAACCGUCCCUUCUCUA  
>piR\_pseudo\_26046  
UAGCACUUGGUUUCGUUGCCGCGAAUAUGC  
>piR\_pseudo\_4728  
UCUGUGGGGAUGUGGAUUUAACGAGCAUUC  
>piR\_pseudo\_25423  
CUCAUGUAUCCAAUAAUAAGUGGGAUAAAU  
>piR\_pseudo\_17326  
UCUGGGCGGGCUUUACCGAAAGCGAGGCUA  
>piR\_pseudo\_15992  
UAUGCAAGCUCCCGUAGUCAUAGCGCUGG  
>piR\_pseudo\_13843  
GACGCGCCCGCGCCCUUGAUCUGCUGGAA  
>piR\_pseudo\_22250  
AUUAAGAUUACUCGUGUGUCAAAACUUAGGU  
>piR\_pseudo\_17490  
UAUCGUACUGCUAUAGUAAAUCGCGGCUAA  
>piR\_pseudo\_9078  
UGCCAUGUGCCUGAGUGUUACACUGAUUGG  
>piR\_pseudo\_25139  
AGUGUAUACCAAGAACCUAACGAUACAAU  
>piR\_pseudo\_13708  
UAUCUUCGCUCUCCGGGUUUGUUUGUAACG  
>piR\_pseudo\_12598  
UAAGAGGGUAAAAAUGGAAACGAUCUUAC  
>piR\_pseudo\_24410  
CGAUAAGACGUUAGUAUCAAUCCAAACUC  
>piR\_pseudo\_15694  
CUCAGGAUUAUCCGACGUGCGCAGAAACC  
>piR\_pseudo\_5495  
GGGAGUCGUACUAUUAGGGUCUAGCUUGUC  
>piR\_pseudo\_22909  
CUUUAUCCCGUUGCACUCCGAUUCGUUAUU  
>piR\_pseudo\_8616  
CGCGGGCCGCAUCUGGUCCCGCCGGGGCAG  
>piR\_pseudo\_3403  
CGACCAGUGACGAUCUCUUGAUCUGUACUG  
>piR\_pseudo\_16855  
CUUAUCAGAAACUGAUAAAGUUAAGAGAGU  
>piR\_pseudo\_12829



ACGUCACUAAUGCUGUUGUAAUUCUCGUGU  
>piR\_pseudo\_25472  
CAUAGCACAGGUGGUCUUUUCUGUCCAAAU  
>piR\_pseudo\_18039  
GCUACUCUUGAGGAUGCUGUAUGUGAUCGG  
>piR\_pseudo\_23432  
UUUAUUAGAGUGUUUCCUCUUGGUUCCAUI  
>piR\_pseudo\_7847  
CUUUGAUCAAUACAAUACCCUUUUCUGGUC  
>piR\_pseudo\_19366  
AGGGUGACUCAAGCUACGGCAAUAGUUUG  
>piR\_pseudo\_16851  
UAGUCUAUCUAGUUGC UAAAAAGGCGGCAG  
>piR\_pseudo\_1683  
UCAAACUACACACUAGGGGAGAAUGUAAUA  
>piR\_pseudo\_23835  
UAGGACUAACCUGGGCCCUCGUUUAGGUCA  
>piR\_pseudo\_19622  
AGUGAAUAACUAGCUAUCUUCGCCAGUAUG  
>piR\_pseudo\_2165  
CAAGUGUUGAUGUGUCAGAAAAGUCACUGU  
>piR\_pseudo\_27448  
UAGAUGGCUUCCACAUCGAUUGUCCUGGAG  
>piR\_pseudo\_4933  
UCCGUUCCUGCUCUUUGAAUCUACAGGGU  
>piR\_pseudo\_24091  
GCUCCGAGGCUGCCCACGUAUGACGUUGGC  
>piR\_pseudo\_568  
GGGAAGUGGGCAGCGUCAUUCGCGGUGGUC  
>piR\_pseudo\_25405  
UUAUUAAACCAGUUAGACUAAAAGAGAUCU  
>piR\_pseudo\_10214  
CCAAGUGCUACA UAAAUGGAUCUACUUUUA  
>piR\_pseudo\_26099  
ACACGAAGACGAGUCUCGGCGCUGGGUGGA  
>piR\_pseudo\_22077  
AACGAUUCGUUAGAGUAUGGCAUAAAGUAG  
>piR\_pseudo\_16758  
CGCAAUCCUACCGCCACCAUACUCGUCCCA  
>piR\_pseudo\_19934  
AAAUCUUGUGGUGUUUAGCUAAGUUCAAAUI  
>piR\_pseudo\_11705  
AUUAGUUUCCCCUACCUGCUUUGACCAGA  
>piR\_pseudo\_3512

CAACCCUCGCAGCCAUUGCAGGAGUUACCG  
>piR\_pseudo\_22950  
AUGAUUGGCAUGAAACGUCAAAACGAUUUA  
>piR\_pseudo\_15225  
GUCCCAAGCGGUCACUUCAUUCGAAAGUUG  
>piR\_pseudo\_14046  
GUGACUUCUCACUCCAAUACCCACAAUGUC  
>piR\_pseudo\_3353  
CUCAUUAUUCAUCGAAUUUAUCUUAUUCUA  
>piR\_pseudo\_8094  
GCCAUGGCUGACGCUACAUAUUGGUCCCGC  
>piR\_pseudo\_2826  
UACAGGCGGAAUCCUAUGAGCUCAGUCGAA  
>piR\_pseudo\_554  
UCAGCAAUCCCGUAGACUUUAGACCUACA  
>piR\_pseudo\_9877  
CCGCGAUCCACGGCUUAUGCCCCGCCCUUG  
>piR\_pseudo\_18882  
UAUUCUUUUGUAUAAUAUCCUUCAUUGGGC  
>piR\_pseudo\_14425  
CAGAAGCAUAAUACUUUAGCUAAGAACGAA  
>piR\_pseudo\_21075  
GUAAGAAAAAAGGUGCACGCGGCCGGUUG  
>piR\_pseudo\_18611  
UCUAAUGUUUAUAGAGUGGUCGAUGACCGC  
>piR\_pseudo\_25096  
UGC UCCCGAAGGGCGAGUGAUGAUGACGU  
>piR\_pseudo\_6057  
AGUGUAAUAGGCAGGUCUGUCUCUCAGGAA  
>piR\_pseudo\_12729  
GGAUAAUAUCAAUUCGAAUAGAUUUAAAGAU  
>piR\_pseudo\_26038  
UCGGCAGCCACAUGUGCAUGUAAUUGAAUC  
>piR\_pseudo\_8954  
CGUCAAAACCGAGUAGAACACCCGCAGAAU  
>piR\_pseudo\_9541  
ACCCAGAGGCUACUUUUAUGCUGUAGGCCU  
>piR\_pseudo\_17151  
CGCAUACAAGCUUUUCAAAACGGCGUGUUAG  
>piR\_pseudo\_13138  
AUUUUUGGAAUAGAGUAAGCAGUGAGUUUU  
>piR\_pseudo\_3091  
AACAAUUGGCCUACGCUGACGGAUUACCU  
>piR\_pseudo\_22123

ACAGUUUGUAUUGUGCGUUAUAGUUUGAC  
>piR\_pseudo\_23696  
GUGUUAUCCGUGCCAUCUUUAACCAAAGUC  
>piR\_pseudo\_25189  
AGUUUCUGGCGGCACAUUUGAGGGGCUCGG  
>piR\_pseudo\_26951  
UUGACUCGAAACAAACACGGUAAGAAAAAG  
>piR\_pseudo\_8885  
GCGUUUUUCGAGUCUGGCGUCGCUUUACUA  
>piR\_pseudo\_666  
CGGUUAAUAGGAUUACUAUAGAAGAUACGA  
>piR\_pseudo\_5327  
AUCGCAGAAUAGAUUUAGUCGCCUUUCAGU  
>piR\_pseudo\_12226  
CGCGUCCGGUUGUCUCACAGGCCAGUCGAG  
>piR\_pseudo\_8416  
CACGCCUUUGUUUCUUGAGCUACAGCCCGU  
>piR\_pseudo\_16104  
AGGCGCAUGGUAUUGAUGUGUAGUCUAACU  
>piR\_pseudo\_23199  
AUAAGAUUAUUAUACCGGCACGACGGACAA  
>piR\_pseudo\_21827  
UGUGGUUAGACACCGCCAGCUGAUUUACCA  
>piR\_pseudo\_412  
AAUACAUAAGUAUAGUUUCGUUUUCAUCGA  
>piR\_pseudo\_23348  
UCUGAUUUAAUACUACGUUUCUGUCGAGUU  
>piR\_pseudo\_9203  
ACGAAGUGGAGUACUAGCAGGGCAACAAGU  
>piR\_pseudo\_14659  
AGUCUAGCUACAUGUAAGGUCGCAUUAGCC  
>piR\_pseudo\_3646  
GAGCCAGUUGCCAAAGCGGCGUUGUUAUU  
>piR\_pseudo\_5911  
GUGUAAGCUUUCAAGGGCUCAGAAGGAGUU  
>piR\_pseudo\_19454  
GUGUAGGCUAAGUGUUCAUAUAAUAGGGAG  
>piR\_pseudo\_7220  
AACUCUGGAAGUGUUGUCUAGGUGUUGCAA  
>piR\_pseudo\_11871  
CUCCUAAAUCGUGAGAAUUAGGAAGAAAAC  
>piR\_pseudo\_19827  
UUGGUUGGGAAUAAUCAGGCGAACCUGAGG  
>piR\_pseudo\_15360

UAAGCCGCCGAUAUCUAGAGACAGCAGAUU  
>piR\_pseudo\_13249  
UAUUUGGAUAAAGAUAAACAUUAUAGAAUC  
>piR\_pseudo\_20616  
UCCUCAAGCUGCCCACCCGUGGUCUGACGC  
>piR\_pseudo\_26235  
UAUUAGGCGGAUACUCGUUGAAAUUGCUGG  
>piR\_pseudo\_5549  
UGUAGUGUCAGUAGCCUACAACGGUCUCGG  
>piR\_pseudo\_25893  
GCAAUCCGAUAGUAGUAUUAAUAUGCGGA  
>piR\_pseudo\_148  
AAGUGAUUGCUGUGACAACUACGGGUGAAU  
>piR\_pseudo\_13344  
UGUACAGUCACUAUUUGACCACACGGGUGC  
>piR\_pseudo\_15707  
UCACCCCGUUAUAGUCCCUUAUGUUCCAA  
>piR\_pseudo\_19398  
UGCCUACGACAAAUAUGGAAUACCGUUC  
>piR\_pseudo\_22294  
UUUUGGUGAGUAAUCAGGAAGCGCGGAUUU  
>piR\_pseudo\_19976  
UAGAUUUUAGUUGUAUCCACGUUAGCGAUA  
>piR\_pseudo\_23436  
CGAUCGGUAAUAUAUUAUUUAAGUAAAUAU  
>piR\_pseudo\_27155  
ACCGGAAAGCGGUGGCGUCUUUCGCGUAU  
>piR\_pseudo\_3456  
UGAAGCUUCUGUAGCAGUCGCCCGUCCA  
>piR\_pseudo\_12926  
CAACGAGGCUUCUACUAUUCUACAGGGAC  
>piR\_pseudo\_26095  
AAUGUUCUUUAGCGAGCUUUUUUUAGUUCU  
>piR\_pseudo\_12902  
UCGAUCUUAUGCCAUUUUAUAAGAUUAAC  
>piR\_pseudo\_17797  
CGUCUUUUUUUGAGGCGUUACCAUGGAUAG  
>piR\_pseudo\_6729  
UUUUUGUGGGUUGCCGUUGCAGAUGAAGCG  
>piR\_pseudo\_11264  
GGCAGAUGUACAUCUUGUCAUAAUAC  
>piR\_pseudo\_14346  
GCUCUAUGACAUAUGUGGUGGUACACUAGG  
>piR\_pseudo\_6853

AUAAAUCCACUUCACCAAUGCUAAGUUCU  
>piR\_pseudo\_4944  
CAUUAUGUUGUAGGUGGGGCGAGCCCAUA  
>piR\_pseudo\_9623  
AUACAAAAGUCAAGUUUAUCCUGAAAAU  
>piR\_pseudo\_13218  
UUUAACAUUUUACCUAAUGUGGAUAAUAGA  
>piR\_pseudo\_21913  
GCACCAUGGCAAGUACAGUUGGUAGAUUUC  
>piR\_pseudo\_22151  
CAAUCGUUUGAUCUUUAACGUUGAGGUAG  
>piR\_pseudo\_13944  
GGCGAGAUCCAGUAGAGUUCUAAAGUGAGC  
>piR\_pseudo\_22984  
UGUUUAGGACGAUUUAAGAGCUACUUACGU  
>piR\_pseudo\_23742  
CGAAUUAUGCCGUUGUAGUUGGAAGUUCUG  
>piR\_pseudo\_8707  
UCUCUUAGGUAUGCAGACUAAAUCCGUCCC  
>piR\_pseudo\_5772  
GGGAUUUCGUCCUGACGUCUGCAGUAGCUU  
>piR\_pseudo\_25167  
AUUCGAGUAGGAAGCUCGUGAAUAGUCUG  
>piR\_pseudo\_26901  
UGAGGAGAGACUUUAUCACCAUCCCCGCC  
>piR\_pseudo\_9125  
GGUGCAUUAAGUAUUACUGUCGCUCCGACC  
>piR\_pseudo\_14566  
UCUUUUGGGGAUCAUUUUUGUCAAGUACU  
>piR\_pseudo\_2776  
UUUAAAAGUAACCUCGAACUAAACAAUAGU  
>piR\_pseudo\_3558  
UGAGACGCUGGUUUAUGUUC CAGGGAUCCU  
>piR\_pseudo\_5990  
UUACUAAGGGAUUCCUCACAGCUGAUGCGG  
>piR\_pseudo\_14938  
CCAGAGGACAGUUUGUCGUCAACCUGGACC  
>piR\_pseudo\_1209  
GACGGAUAGAGCGGGCCAUCCACCUUAAG  
>piR\_pseudo\_15422  
AGUCCGCUAUAUUUGUUGCUCUAAUGUC  
>piR\_pseudo\_20574  
GUCACCUAACUGAACAUCCUGAUUUCGCUU  
>piR\_pseudo\_17494

GUACAGCAGCGACACGCUAGUGAGACUAGA  
>piR\_pseudo\_9775  
GGUUUUCACAGUGCCGAUACUUGGCGACUU  
>piR\_pseudo\_21852  
UUUCUUUAGGCAAUCUAGUAAUAAAAAA  
>piR\_pseudo\_20565  
GACUCUCUCUGCGGCAUUCGAUAGGUGGAA  
>piR\_pseudo\_20785  
CGUCGCCGACGAUUGUCCGAGGAUCAGCG  
>piR\_pseudo\_22536  
CGCUGCAGACGUGCGUUCAGGUGGCCCGCC  
>piR\_pseudo\_3459  
UCGCGGCGAUUGUAGAAGAAUAAUUGAGCU  
>piR\_pseudo\_20887  
CUGGUCUUAGGUUUGGCAACAAGGCUGUCA  
>piR\_pseudo\_8022  
UCGGUUCUGUUGAAUUGAAGUGUCCCAUG  
>piR\_pseudo\_14450  
GCUACGAGUGAGAAUUUGAGGACUGGGUUA  
>piR\_pseudo\_1967  
GGAGGCCGAGAGGCGGCGCUCGCCGCA  
>piR\_pseudo\_9719  
CCGGUUUACGACCUGCCAUCUUCUGUUGUU  
>piR\_pseudo\_23210  
AGAGGGUCAUACUGUCGGCGGUUCACGUUU  
>piR\_pseudo\_13330  
GUCAAUGUAGGCCCCUCCUAACAUGUAAG  
>piR\_pseudo\_20592  
GGGACGAUCAAAAUGGUGCGACGUAAGGAA  
>piR\_pseudo\_22069  
GACUUAGUGGCCUACCUUUGGCUCAUCGUG  
>piR\_pseudo\_15796  
CCCAGCUUCUAAUCCGCCCUACAAUACGG  
>piR\_pseudo\_13632  
GGUUACCUCUGUCAAUUGUCAGGUAAGUGA  
>piR\_pseudo\_262  
UCGGGCUAGUGGCGGAUAACAGCAGUAAG  
>piR\_pseudo\_16923  
AUUAAUCGAUCGCCGUGUUUGAGUAUUUU  
>piR\_pseudo\_12746  
UUACCUGGAUUUUAAAAUCAAUAGUCAUA  
>piR\_pseudo\_17813  
GGCCGGAACGCAGCUUCAUCGCAGGAAAAU  
>piR\_pseudo\_23529

ACUGGACCGGAAUACCCAUUUCCUAGCUUC  
>piR\_pseudo\_27324  
UACGCGGCUAGUCCAAUUUAUAAUAGCACU  
>piR\_pseudo\_5839  
AAGUCAUGGUGGUCUGUAGAUUAUGGGAC  
>piR\_pseudo\_17753  
UACUGACGGAAGGAUAUGCUCUUGGUGGUA  
>piR\_pseudo\_24871  
AUCCAUAUGUUCAAUCGAAGCAUGACCA  
>piR\_pseudo\_14641  
CAGAUACAAAUAAGGUCUUCGAUUUAUCAG  
>piR\_pseudo\_3073  
CCACACCCGCCAUGUAAACUACGUUA  
>piR\_pseudo\_21926  
AUCUUCGGGCACUUGGACUUGAAAUCGCC  
>piR\_pseudo\_7212  
AAGACGCGCUAUCACGAGUGGUGUAAUCGA  
>piR\_pseudo\_7397  
UAGAGUAGUCAGUGAGCAAUCCAUGAUAU  
>piR\_pseudo\_3836  
AGUAAGUAGCCACGUGAGUCAUCAUUCUA  
>piR\_pseudo\_27197  
CGGUAAUUGUAGGUCUACGACAUUCGUCA  
>piR\_pseudo\_18546  
GCAUCAGUGUUGUUCUCUUGCUGAGCGUGG  
>piR\_pseudo\_15293  
GACCCUUCAUAGAAGACCGGAGGAGACGCG  
>piR\_pseudo\_12550  
ACUUAAAUAUGCCGUACACCGAGUGAGUGC  
>piR\_pseudo\_27087  
UUUUGACUCAAGGUCACCCUAUGAAAUCC  
>piR\_pseudo\_19803  
UCUAUUGGAAGCAUCGCUACAUUAUCGAGC  
>piR\_pseudo\_547  
ACCGGUGAAUCAUUGGUGAGACCUGGGUUU  
>piR\_pseudo\_5464  
UCUGGGGUGUGUCAACUUUUUGUGUACUUA  
>piR\_pseudo\_15288  
UUUUUAAAGGAUACCAGUAUGACAAAGAAG  
>piR\_pseudo\_18767  
GAUAAUUAGAACGGCUACGCUAGCCCGCGU  
>piR\_pseudo\_22641  
UUGAGUGUAAACGCGCUGAGCGGGAAUCGUG  
>piR\_pseudo\_27046

UAGCUCACGUACCUGUAACGGCUUUCGACG  
>piR\_pseudo\_13180  
UUUGUUGUAGCUCUCAUGUCAAUACGAUG  
>piR\_pseudo\_14688  
GACAGACAGCGAGCUCGAAUCGGUAGGGGU  
>piR\_pseudo\_5949  
CGUGUCAUUUUUUGAGCUUGGAGCGAUGC  
>piR\_pseudo\_17027  
AUUCCGGAUCCGGCUCGUACUGACAGGAUC  
>piR\_pseudo\_2154  
AUCUUUGUUGCUCUUAGUUGAUGGUAUCAA  
>piR\_pseudo\_4701  
UAUGUGUACAUGUUGAUAAAUUUGAGCAU  
>piR\_pseudo\_15275  
AGGCAGCAGUCUAUCGGGAGGCAGUCACCG  
>piR\_pseudo\_12254  
GGACAGUAUUACUAUUUUCUUAUGAUACC  
>piR\_pseudo\_14694  
GUAUUUGAUUUUCAUCCUGGGCAUUUUG  
>piR\_pseudo\_3767  
GAUUUGAAUAGCUAGAUACGUUGACCUCAC  
>piR\_pseudo\_21399  
ACUGACGGGUAGUAUUCGCCGUUGGAGGA  
>piR\_pseudo\_24996  
CCUUGUAAGUCGGACAGUAAUCCGCGCUU  
>piR\_pseudo\_18161  
UCUUUUAACUAAUUUGCAAACCAGCAUCUC  
>piR\_pseudo\_16551  
GUCGGUCAUUACCUCGGAUUCUAAUUAUA  
>piR\_pseudo\_27077  
UAUAGGUUGUACUCCAUUGCGAUACGUUAG  
>piR\_pseudo\_19797  
AGGAGCGGGUUAGGCGAACUUCAGAUAGU  
>piR\_pseudo\_20719  
AGUAGCAUCAAUGCCAGUAGAAGCUAACA  
>piR\_pseudo\_4788  
AAAUUUGUUAAGUAGAUUCAUGUAUGUAG  
>piR\_pseudo\_10272  
AAUGACGUGGCAAGUGAAGUACGACAGUUU  
>piR\_pseudo\_10104  
GAGGACCAAUCCAUCUGGGGAAGUCAGAC  
>piR\_pseudo\_626  
CAUGCUGUCACCUGCACUAAAUUUACUCUA  
>piR\_pseudo\_3223



AGCUGUAAGUUCACGAUACGGAUUCGACGU  
>piR\_pseudo\_5043  
AUUGACUCUCGGUCACCUGCCACGCACAAC  
>piR\_pseudo\_21095  
UUCCGAGGCCCAAGGGGGUUACCAGGGAU  
>piR\_pseudo\_9556  
CUCUAGUUACGUUCCGCGGGGCGCAGUGUG  
>piR\_pseudo\_20632  
ACCAGCGGCUUGACGAACCAGCCCAUUCU  
>piR\_pseudo\_12678  
UACUAGCCCCUUGCAGUACUAAUUGAAGG  
>piR\_pseudo\_20654  
ACACAGCCUAGUAUCCGCACAUCAGGGGUA  
>piR\_pseudo\_16288  
AGGGCGUUCAGUGAAGUCUACUUUGUCGGU  
>piR\_pseudo\_9766  
GCGGCUUUGACCAGGGGAAGAAUACGUUCG  
>piR\_pseudo\_10284  
GGCGUGUGGGAGGUGUUUAUAGCAGCCUUGA  
>piR\_pseudo\_16397  
UAUUGAUGUCAAGGACGUUGUUGCACGCCA  
>piR\_pseudo\_19591  
UCAUGGUCGAAACUUUCUCAGGCGCGGUCU  
>piR\_pseudo\_1523  
CCGCAUUCAUAACAGCUGAAAGGUUACUAA  
>piR\_pseudo\_26355  
ACAUCCAUAAGAACCUUGUUAGGUAAUUCU  
>piR\_pseudo\_5027  
GGAGCGGCGGGGCCCGUAGCUGUUUCUAG  
>piR\_pseudo\_3541  
GUGUUGCUCAAACUUAGCUUGCUCGACAU  
>piR\_pseudo\_15264  
UGCCUCCAAGGAAGGACGUUACAGGGGUGG  
>piR\_pseudo\_9795  
UUUACGGUGUGGGUCUAUCAAAUACUGGA  
>piR\_pseudo\_5959  
AGUAGUUUAACCCGAAGCUUAGAAUUCG  
>piR\_pseudo\_12848  
GUUUUAUUGAUAGGUUCUUUUGGUUAAAU  
>piR\_pseudo\_18969  
CGAUGUAAGCCAUCAUAAAUGUAUUUCCA  
>piR\_pseudo\_23812  
GAUGGGCAUCUGCCUUUUUGGAAGUGGUU  
>piR\_pseudo\_16113

UUAUGUUAGAUGUUGAGUUUAGACGCCAGU  
>piR\_pseudo\_13231  
AAGAUCUCCUAUCCCACGAUUUGAUCAUCC  
>piR\_pseudo\_14125  
GUUAGUCAGUUUGCCUCAUGGAUCAGUGUA  
>piR\_pseudo\_13055  
CAAUUACGCGCAAGCGUUGGUUGAUCUAGA  
>piR\_pseudo\_17911  
UGCGCUACAGUACAUGAUCUAUUUAUGGCG  
>piR\_pseudo\_19577  
UUGCCAGGAAUUUUGCAGUCGUGGUGAGAG  
>piR\_pseudo\_26241  
CCUCUUUAUUUGAUUAUAGGGGAUGUGAA  
>piR\_pseudo\_3133  
UUCUCGCUGGUUCUUAGCGGGACUGUCGG  
>piR\_pseudo\_25568  
UAGUAUGUACUUUCGUAGUUGAGCUGCGUG  
>piR\_pseudo\_12119  
UGGUGUGGCUGAGGGUCGGAGAGAAGCACG  
>piR\_pseudo\_18603  
CACUAUUGUGUAUUCUAAGUUGCUGAACUG  
>piR\_pseudo\_2053  
CUGUACAGAAACGGCUAUGCAUCCUGCAG  
>piR\_pseudo\_18191  
AAGUGGCGUGACGCACGUGCCGUUCGAUA  
>piR\_pseudo\_8044  
UCAGAACGACGAUUGUGAGAUGUGCCCAUU  
>piR\_pseudo\_21966  
CUGAGUCAGGCGUCUUUUGAACCCUGUUAC  
>piR\_pseudo\_3078  
CCAAACAGUAGGCCACCUUCAGUUGUUAGC  
>piR\_pseudo\_13187  
GGUGCAAUCAACGAUCAGUGGAUAUUCGAU  
>piR\_pseudo\_2954  
UUCACCUUGCAUGUCUCAUUUGCAUCUGGU  
>piR\_pseudo\_19099  
AAAGUUCUAAGACACGACACGUCGAGGUUU  
>piR\_pseudo\_24665  
UGACUACUUUCGUUUGUAUUGACGAAAGAC  
>piR\_pseudo\_26445  
AACCUGCGGCGGAUCCAAACCUGUUCAUGC  
>piR\_pseudo\_18577  
UGAGAUGAAAAUUCUGCGAAACCAAUCCAC  
>piR\_pseudo\_9283

AUUUACCCAAUUCUUCGUUUCAGUAAUCAG  
>piR\_pseudo\_24701  
GUUAGUUGGCGGCUUUUUUUCCGGCAAGAC  
>piR\_pseudo\_6664  
ACGUCCCAGAAAGCGGUUUACCUGGGGUAG  
>piR\_pseudo\_25989  
UUACCAGCAUAAGUGAUAACGCUAGCUCUG  
>piR\_pseudo\_4622  
AAUGGGCAUGGUUUUGAGUAUUUUCUCCGU  
>piR\_pseudo\_9880  
UCCUACGUGAAACUCUAGAUUCGUUCCUUG  
>piR\_pseudo\_182  
UACACUUGGGUGGUGAGCGUCCCAGAGUAC  
>piR\_pseudo\_21408  
AUUCGAAGACUUGGAAGCUACAGACCGUCU  
>piR\_pseudo\_3894  
UGUCACAUCUUUACAUUUCAUUUCACCCC  
>piR\_pseudo\_14737  
AAACCUUCAGUUGGCUUGUAGUUUAGAUUU  
>piR\_pseudo\_24495  
AAGUGCAUUUGUUUGCCUACAAACUCUCG  
>piR\_pseudo\_16985  
AGCUUAUGAACCGCGGAUUCAUCGUCGCU  
>piR\_pseudo\_23274  
AAAUGUUGUGUUGCGAUUAUAUUUUUUUAU  
>piR\_pseudo\_20332  
CGUUGUGUUGGUCGUAUUUCCUAGUGGGAG  
>piR\_pseudo\_2907  
UUUUUGCAAUCUAUAUAUAACUGUUUUGUC  
>piR\_pseudo\_15286  
UUGUAGGCCGGGAAAUAGAACAGGGUCGAC  
>piR\_pseudo\_24188  
AACUAAAUGCAUUCUGGUUUCAUGUAGCAA  
>piR\_pseudo\_25310  
UUUUUCAUUAUCUAUCGAGGACAAGUUGC  
>piR\_pseudo\_23061  
CGUAUGAGAUUGAGGCGUCGAGCCGAAUUG  
>piR\_pseudo\_1715  
CAUGAUCGAUUCGGUAUCAGACAAGAACGU  
>piR\_pseudo\_10277  
CUUAUUAAAUCCGUAUUGUUUUCUGCUUGG  
>piR\_pseudo\_26322  
GCCCUAUCUGGGUCCGGGAGCAUCGCGAG  
>piR\_pseudo\_18860

UGUAUGCAUCAUGGUGGUAACGACACAGG  
>piR\_pseudo\_25873  
GCCAUUCCGCCCGCAGCCGUGGAAAGUGCC  
>piR\_pseudo\_18358  
AAUUAGAAGCCAAUUUAUAUGGCGGUGGGAC  
>piR\_pseudo\_17162  
GAUGACGAAUGGAUACUUCUACUUAUAUGU  
>piR\_pseudo\_651  
UUAGGUGUCCUAAAAUUGUAUGUGGCUAG  
>piR\_pseudo\_26420  
AAUUUGAGGAACCUAUCAGGGUAAUCCCAU  
>piR\_pseudo\_1180  
UAGAAUGAGAGCUUUUGAUAAGGUUUCUCU  
>piR\_pseudo\_9316  
GACGGUUAUUCGAUGUUGCCAGCGGAAGCG  
>piR\_pseudo\_3595  
UGUAGGACAUCGUGCUCUAAUCAACGGUA  
>piR\_pseudo\_14899  
AAUACGCGAUGAUAGAUACUCACAGGCCCG  
>piR\_pseudo\_11736  
CCUUUAGGGUAGUUAGUUACGUUCGAGUCG  
>piR\_pseudo\_23441  
CGAGAUCAAGUUAGUUUACAAAUGUUUUCG  
>piR\_pseudo\_3373  
CAAAAGUUAUGAUUUCGUCUGUGACUUCAG  
>piR\_pseudo\_1235  
GGUUUCAGGUAGUGUUCGCGUGGAAGCCCA  
>piR\_pseudo\_282  
CGAGCCAGAAUCCCGACUUGGACGGGUGCG  
>piR\_pseudo\_8792  
GUCGAUAGAGUCAGCGCGGAUUUAAUUUGC  
>piR\_pseudo\_6008  
AUAGUAAAGACACUAUUUAACUUAUGUAUC  
>piR\_pseudo\_26017  
UUCAUGAUUUUCCUCGUCAACAACAUAACU  
>piR\_pseudo\_32  
GUUAAUUAAAUCUAUAGUGCCUGAUCGUAC  
>piR\_pseudo\_4075  
AGGCUGGCGACCUCUGGAACCAUAGCGAAC  
>piR\_pseudo\_20441  
AACUUCGGACCGAUGGCCCGUCGUAAUACU  
>piR\_pseudo\_4675  
AGAAUAUUCUAGGCAGAAUCCAAUCUCCAU  
>piR\_pseudo\_22062

CCGUGAUGUGUAACGUAGGGUUUCAAGUC  
>piR\_pseudo\_5106  
ACUUUUCGAUGCGAUUGUUGAGAUAAUAGA  
>piR\_pseudo\_7493  
ACUUCAGAAUAUCUAAGAAGAAUUCGCUAG  
>piR\_pseudo\_4022  
GUAUAAGCACUCAGGGUCGUCUGUCUGAGU  
>piR\_pseudo\_22895  
GACUGAUGGGCUUUUUAUAACACCUAAAUG  
>piR\_pseudo\_22038  
CCGGCGAGGUGCCGAGCUGGGCCUAUUGGU  
>piR\_pseudo\_6700  
UGACUUUAAAUCAGAAGGCUCUCGAAAUAG  
>piR\_pseudo\_410  
UCACAUCCCCUCUGGGUGAAGCCACAGGU  
>piR\_pseudo\_14726  
UGGAGCUGCGCGCAUGAGCUAUAACCUAUU  
>piR\_pseudo\_20462  
GGGAAAUUUCUGUCCCUGGUACCCUGGCUU  
>piR\_pseudo\_20554  
CGCCCGGCCUCUGCGGGCCGUGUCAGGUA  
>piR\_pseudo\_24680  
UUUAGAGAGAUCUACUCAGAGGGCUCUGUA  
>piR\_pseudo\_16051  
CCUCUGCGCCUAUCAUAUAGGGCGCGGACA  
>piR\_pseudo\_25825  
AACCUUCAUUAUUCGAACCGGGUUAAGUC  
>piR\_pseudo\_11709  
CUUAUGUGGAAGGGCCCCUUUCUUCUGUC  
>piR\_pseudo\_914  
AGAGAACUGAUCCUAAGGAAUAGAUCGAA  
>piR\_pseudo\_9001  
UAUUAUUGCCACCGGUUGCGGCUUUCUGA  
>piR\_pseudo\_24657  
UAGGCAAUACGAGUGCAGGUCCUGUCCAG  
>piR\_pseudo\_21863  
AUACUGUCCAUAUCCUGAUAAGAACCA  
>piR\_pseudo\_4036  
GCGAAUAUGUUUGCAACAUCUACGCUGACA  
>piR\_pseudo\_21739  
CCUGUGGCAGAACUUGUUAUCUGGACCAAU  
>piR\_pseudo\_13533  
UCCUAUCUACCAGAGAAUGCGUUUCUGAU  
>piR\_pseudo\_5613

AAGAUCCGGAUAAACUAGAUCAGGGUACAU  
>piR\_pseudo\_103  
GGUAUACACUACACACUCAAUUGUUUGGU  
>piR\_pseudo\_5599  
ACCUCACAGAUGCAGCUGUCCUCCGACGG  
>piR\_pseudo\_17351  
GGCCACGGGCGCAGGCGCGUCGCAGCAG  
>piR\_pseudo\_22150  
UUGGUUAACGUACAAUAGGAGAGACCUAAA  
>piR\_pseudo\_23246  
AUCCAUUCGAAUAGGGAAAUUUAUUAGAAU  
>piR\_pseudo\_8101  
CAAUAAGACUAUACUAUUUAAAAUUUUUC  
>piR\_pseudo\_15977  
ACAUUAACAGAUACUGAAUCGCCCGGCGCA  
>piR\_pseudo\_3932  
UUAGAUGAGUCCUGACUUCGGCGUUGAUUU  
>piR\_pseudo\_3198  
AGGAGGUUGGCCUCAGCGAGGGGAGAGGUA  
>piR\_pseudo\_4568  
UCAGUUUUUUACAAGGCGAGUGCCUGCGU  
>piR\_pseudo\_26766  
AAAUCGUGUCACUGUUGAGGGUUUAUGUA  
>piR\_pseudo\_22734  
AUCGCGGAGGUUCGGUGGACUCCGGGACA  
>piR\_pseudo\_21657  
GAUUCAGUAGGUUUUAUCAACGGUCACAGCG  
>piR\_pseudo\_19461  
UCGGUAUUUGCGAUUCAGAGUGUGUGUUC  
>piR\_pseudo\_17285  
UCUAUGUCGGUUGAGGACAAUUUAUCGCA  
>piR\_pseudo\_20339  
GCCGCUAGGCCUGUCCGUCCAAGAUAAAGUC  
>piR\_pseudo\_21211  
GGUAGUCUUUAUAUCGCUUUUCCGGUGAUA  
>piR\_pseudo\_16791  
UGUCGUUGUCGCGGAUGUCCGGCCCGUUA  
>piR\_pseudo\_18690  
UGCCAUGCUUGCCGGGUUGCAGCUUGUACA  
>piR\_pseudo\_21781  
UCGUGGGUUUACUAUACAGUUGAAAUAUGU  
>piR\_pseudo\_12189  
UGGUCCGUAUUCGCAACCUCGCGUGCU  
>piR\_pseudo\_19042

UUGACCGGAUUUCGUAAAACGAUGGAAUGA  
>piR\_pseudo\_8945  
CUAUUACCAAGUCCAUUUGCUAUUAACAG  
>piR\_pseudo\_18163  
ACCCUGCGAAGCAGCAAUUUGCGGGUUAG  
>piR\_pseudo\_26265  
UAAGAGUAUGUGAGCUUCCAAUCGCGGUCC  
>piR\_pseudo\_4969  
AGAUUGUGUCCGUUCUCUCCUAGUGAUGU  
>piR\_pseudo\_6028  
UCCUCCGAUCAGCAGGUAAAGACCUCAAUC  
>piR\_pseudo\_3492  
AGAUAAUUAUAAAAUUAUUACUCAUAA  
>piR\_pseudo\_16329  
GACCCAAGAACAGCCCCUUUCGUUCGGUU  
>piR\_pseudo\_4066  
CUUAGUCGAUGGUUAAAGCCAUCGGCAGA  
>piR\_pseudo\_20290  
ACGAGUGUCAUAGGUAAACGUCUUCAUCGC  
>piR\_pseudo\_23417  
UUAUAAGGCUAUGGUCUGUUAACGGCAUCC  
>piR\_pseudo\_3981  
GAAAUUUUCUGGUGUGUACCGUACUAUUGU  
>piR\_pseudo\_22263  
CCGCGAAUCUAUGCAGUGUUAAACUCCAUC  
>piR\_pseudo\_25759  
UACCCAUUUCCCGGUGAAUUGUAACAGCUG  
>piR\_pseudo\_22085  
UAAUAUAUGUAAUUUGCAGUAAUUGAUUU  
>piR\_pseudo\_14929  
UAACGCUUGUCCUGCUCGAAGAAGGUUAUG  
>piR\_pseudo\_17678  
GAAUACCGUAUUGUCGCCUUACAACCCU  
>piR\_pseudo\_17035  
CAAAGUGUCGGUAGGCUGUCGGCCUGAAUC  
>piR\_pseudo\_9845  
GGUUAGUAGACGUCCUUUAUAUUCUGCAC  
>piR\_pseudo\_11832  
GUGCCCCGCGUACGGGGAACCAUCUCGGGG  
>piR\_pseudo\_26525  
GUCUUAGAUUUUAUAAAUCUUGAAGCAAUU  
>piR\_pseudo\_26806  
UAAAGAGCGCCAUAUCUUGCAAUUUCUACCC  
>piR\_pseudo\_12935

GCUACGACCAUGCAGAGCCCACUUUGCGAU  
>piR\_pseudo\_3504  
UACUCUGUCACUUGAAUUAUAAUUACUCAU  
>piR\_pseudo\_25801  
GUUACGUGACCUGAUCUUUGGGGUGCGACA  
>piR\_pseudo\_11728  
CUGUAGUCCAAUGCAGCACAACAAUACAAUC  
>piR\_pseudo\_19263  
UUCGUGGGGUGUGUCCCCAGAUUUAGCGG  
>piR\_pseudo\_24435  
CAUUCAGCUAAAAGUUUCUAGCCCACUCCU  
>piR\_pseudo\_12981  
CUCAAGGAGCUUGCGUUACAUCUGUGGU  
>piR\_pseudo\_19189  
UAUUAUUUAAUUAGUGAGACGAAUUAUU  
>piR\_pseudo\_7525  
AAUUAUUUCUGGAUUGGAGAAUACUAAUAC  
>piR\_pseudo\_3935  
AACCGUAUUAAUAACAGAGCUCUUAACAG  
>piR\_pseudo\_1916  
AGUGAUGUUUCAAACAGGUGUGUCAUUUC  
>piR\_pseudo\_13880  
GCCCGCAGUCAGGGGGGGCGGCGUGACAC  
>piR\_pseudo\_17963  
CCAGUAUUGUCUGCUAGUAACAUGUGAAUA  
>piR\_pseudo\_9446  
UCCCGCAGCGUCAUGACGCUCACCAUUA  
>piR\_pseudo\_22670  
AGCUGUGAUUAAGUAUCCCUUGAUGUCCA  
>piR\_pseudo\_21608  
AUCAUGC UUUUAGAGUGAUUACCCCGAGU  
>piR\_pseudo\_18597  
GCAGUCGUUCCACCUCAGAGUUAGGAU  
>piR\_pseudo\_21966  
ACACUAAGAAGAGGCAGUCUAUAUGGCUUU  
>piR\_pseudo\_280  
AGAGAGUCGGUUUAGACUAGGCGUCAGCGA  
>piR\_pseudo\_16396  
UGGUCCCAUACUUGCAAGGCGGCCCGCGGU  
>piR\_pseudo\_6246  
CCCGGCUACUAAAUUCCGGUGACGGGUCAC  
>piR\_pseudo\_2702  
CUUAUUUUCACAUUGUCCCCAAAGUCGCGU  
>piR\_pseudo\_22026



ACUAGAAGUCCGUGACGUACGGUACAUCAC  
>piR\_pseudo\_18081  
AGAUGGCCAGAUCUGAGUUCUAUUGUGACU  
>piR\_pseudo\_25184  
ACAGGAACUCGCCGUUCUUUCGGUAAAGAU  
>piR\_pseudo\_16033  
GCGUAAGGCCUCGUGCCUGGAUGAAUCGU  
>piR\_pseudo\_25987  
UCUUGUUUUUAGAAUGAAGGAAACCUGAGC  
>piR\_pseudo\_14367  
AACUGUGCCGCAUGCAGUUUAUUUUUGCUG  
>piR\_pseudo\_11631  
CAGGUUACCACCAGCGGUUCUCAUCUGACG  
>piR\_pseudo\_26364  
CCCAAAGACGGUCGGGACAUGACUAUCGGA  
>piR\_pseudo\_16989  
CUUUUGCACUACACGAUGAUGGCUUGGUCG  
>piR\_pseudo\_2302  
UAUUGAAGUGCCUUGUAUGAGCCGUGGCUA  
>piR\_pseudo\_7731  
UCCUACCAUAAAACGUUAGUAUCGGUUUC  
>piR\_pseudo\_25332  
UAGUGUGGAUCACCUGUAUACAUAUCCGG  
>piR\_pseudo\_2681  
UUGAUUAGAAGCGUGCUAGAAUUUGGAACA  
>piR\_pseudo\_7664  
AUUUCAGGAGAAUCCGUCCGAAUUGCCCAG  
>piR\_pseudo\_22150  
UCUGGUUAAGUUA AUGGUACCAGUCGUAA  
>piR\_pseudo\_6344  
GUCCCCAAAUGAUUAAAUUGCAAGGGUUGU  
>piR\_pseudo\_14542  
UACCUUAAGGGACCAAUUACGUGGUAAUAU  
>piR\_pseudo\_2725  
GCCAGACAAGUACCACUCCAAUUGUUUCA  
>piR\_pseudo\_5412  
AGUUUGUGGGACCAAGUUUGUCUUAAGUUA  
>piR\_pseudo\_20496  
UCUGCUGUUAUAGGCGAUUAUGAGCCGCCU  
>piR\_pseudo\_21591  
UCAAUGCUGUCCUGCAAAUAGCUGUCCUA  
>piR\_pseudo\_23365  
ACACGGUCCAAUAUAUGUGGGAUUGCCCAU  
>piR\_pseudo\_21625

GAAAGACGGGCUAGGGAUGAGCAGGGAGAU  
>piR\_pseudo\_20983  
GCUGGUGAAUUACUAAUUCACAGGGUCUCC  
>piR\_pseudo\_491  
UCUAUGUUUACACAGGUAGGACGUUACUUU  
>piR\_pseudo\_20716  
AAAAUCGCUCUAGGUCCGGUGGCACUUGUA  
>piR\_pseudo\_18447  
AGUAUCAAGUCAUCCUGACCGAUUGGGAAU  
>piR\_pseudo\_20377  
GUCUUUAUUUAUAAAUUUCUUUAGAGAAC  
>piR\_pseudo\_11264  
AUAUGUCGGGUGGGCCAGUGGUGUUGGCGA  
>piR\_pseudo\_12147  
AGCUGGGUUGUCGUUAUUCUCUCCGGUACC  
>piR\_pseudo\_15425  
GUGUGCUUAAACCGGCGGGUGUAAGAUAA  
>piR\_pseudo\_6976  
AUGUGCAGAGGUCUAGUCCUAGCUAGAUG  
>piR\_pseudo\_22076  
CGAGUAAGUUGCACUCUCACGGCAAGUAGA  
>piR\_pseudo\_6295  
UUUUUAUCUUGCCACACACCUUCAUGACUA  
>piR\_pseudo\_5080  
GAGCCCGCAGGGUGGGCGGGCGAUGCAACC  
>piR\_pseudo\_550  
AGUAGGGUUGCGCACACUGUGCAUAACAAC  
>piR\_pseudo\_4513  
UGUUUUUAUCAGGUCGCCUCCUCCAGCGG  
>piR\_pseudo\_27103  
GAGGAAGAGGUAUGGAGCGACAACUUGAUG  
>piR\_pseudo\_22511  
AAUGCAGACCGUUGUCGGGUGUGGUGGCAA  
>piR\_pseudo\_9817  
CACGUGCAGCCCUGGUCCGUUCAGAUUAUA  
>piR\_pseudo\_20195  
AAAUAGAUCACCCAUCGUACGGUCCUUGGC  
>piR\_pseudo\_15468  
CGUCGUAUCCAGUUUUCGUGUGUAACCAC  
>piR\_pseudo\_12498  
UCGUUUUAUAGCUUGGAUCCAGUUUUUGGAG  
>piR\_pseudo\_24695  
UGCUCGCGAGUGGCCCGCAGAUUAACUAU  
>piR\_pseudo\_7453

CACAGACAUCGAGGCCAGAGUUUGAUUU  
>piR\_pseudo\_14711  
AUCCCUUCUUUCAUACAGGUACAUAGCUU  
>piR\_pseudo\_17900  
UGGGUAAACAGCCGGAUUUGUAGAUCGGAU  
>piR\_pseudo\_26645  
CCAAUAAUUUGGUCGUGCCAGGGCAAUUG  
>piR\_pseudo\_21204  
GGGUAGCCAGCGUCGUCUCCACGGCAUGCG  
>piR\_pseudo\_16661  
UUGGGCAACGCUAAGUUUCUUAUAGUAUGA  
>piR\_pseudo\_3665  
CGACUUUGAUGGUGUUGCUCGGCCUACACG  
>piR\_pseudo\_26125  
GGUCUCCACCACUCCGGAGCGACCGGUGG  
>piR\_pseudo\_24043  
GUAAGCGUACUAUAAUAAGGGAGUCCCAUC  
>piR\_pseudo\_15799  
GCUGACUCUUCGAGGGUGUAGUUUUCUACC  
>piR\_pseudo\_6639  
UCGUCUUAUGGACAGUUGUGUAAGCCUAAC  
>piR\_pseudo\_24320  
CACUAUUGUAUUAGCAUCGAUUAUAGUAUCA  
>piR\_pseudo\_19518  
GUUCGGGAGACAUGACGUUAUAGGUAUCUCG  
>piR\_pseudo\_14104  
UUAUCGUGUCUACGUCGACGGGUCUACCCG  
>piR\_pseudo\_25149  
ACUUUGUCAUCGAGGGAAAAUCUCUGACCG  
>piR\_pseudo\_11604  
CACUCAGAAGCUUUUCUUAUUUGAUAAAGG  
>piR\_pseudo\_12952  
ACCCACCGGCCGGCGGUUGCCGGGGCCA  
>piR\_pseudo\_13247  
CUCUCCGGCACUCAGUGUGUCGAGGGUGU  
>piR\_pseudo\_3819  
GUUAUCAUCCUAGUGGACUCCUCAAGCGUG  
>piR\_pseudo\_17031  
AGCUUCGUUUGUUGAUCGGAAGAGUUCUUU  
>piR\_pseudo\_23231  
UUUUCUUUAUUCAGUUAAAACUUAUGUUAC  
>piR\_pseudo\_320  
AACAUUGUCCGUUACAGGUCGCCCCCAGA  
>piR\_pseudo\_7575

CUUACCAACUUUUAGGAUUUUCAGUCGCCC  
>piR\_pseudo\_1860  
GCCCGCGGAUGUGAAACAGUGCAACAUAGA  
>piR\_pseudo\_16669  
UGAGGAAUAGCGCGCAUACGAUGUAUUGUU  
>piR\_pseudo\_23885  
UGCCCCAAAUAUAAACAACGGGCCUCUG  
>piR\_pseudo\_2864  
GCUAAUUGUACGUUAUUCAGGAGGCGAUUA  
>piR\_pseudo\_3496  
CUAAUUGUGUUGUUAUGAACUUUAUUGAUG  
>piR\_pseudo\_20807  
UCCCAAACGUUGAUUCCGUUUUGUAGAAAC  
>piR\_pseudo\_24679  
GCGGUGCGCGGAGCACUCAUACGGAUGUC  
>piR\_pseudo\_1501  
CCUAUGAGUCUUCUCGGAUCUGGCGUGUU  
>piR\_pseudo\_6296  
GCCCACGUGUGGAGCAUUUAUACUAGAAAC  
>piR\_pseudo\_17184  
UAACGCGAGGAAUCGCGUGCGGCGGUUCGG  
>piR\_pseudo\_24040  
UUUUAUCGCAGCCGCUCGUUACGAUUGGAC  
>piR\_pseudo\_15785  
GGACCUGGAAAGAGUAUUUUUGAACUUGAG  
>piR\_pseudo\_20962  
GCCCGGUACGGCGGACGCCGAGGCCGCUG  
>piR\_pseudo\_16405  
CUUACUUUAUAGUUGGUACCAAGUGCCGGUG  
>piR\_pseudo\_13058  
UAGUGUAUAAGCUGCGGAUGUAAAGAUGGG  
>piR\_pseudo\_215  
UCUGAGAACGUAAAGUAUUGUUCAUCAAAG  
>piR\_pseudo\_15108  
UUGGAGGAAUGCAGGCCGUUGUAUAAUAUG  
>piR\_pseudo\_26481  
UCUCUCCGUGCGUGUAAUGUUUAUUCGG  
>piR\_pseudo\_20723  
GUGAUGAAAUUGUACACUUCGGUCCCUCGG  
>piR\_pseudo\_1805  
AAUGAUUUCGUUGGUGUCAUUCGUUUUCC  
>piR\_pseudo\_20308  
UUAAUUAGUUGAUUAAUUGGUUUUAUAAAA  
>piR\_pseudo\_23627

CUGAGCCGCCGGUAGUUGGAUGUCACGGA  
>piR\_pseudo\_12047  
GGACGUGUAAAUUUAAUUGCGUAAUAGGC  
>piR\_pseudo\_22886  
UGAAUUUCAAUUAACCAAUUGAAAUUCGA  
>piR\_pseudo\_15466  
UCAAUUCUGUCGUUAUUAUUGUACACCCACGG  
>piR\_pseudo\_17672  
UGAGGAUGUUCUGUAGUAUCUACGCAAAGC  
>piR\_pseudo\_18405  
ACAAUUUGUCUGAUUGAUUGUACUUACUUAU  
>piR\_pseudo\_19345  
CUGAUCGGUAUUCUUUAGACAAGGUAUGAG  
>piR\_pseudo\_11918  
UCCGUCGUGCGUCCUGCUGACAGCCAAUCG  
>piR\_pseudo\_3285  
GCGUCUAAAUAUCUAACUUUCGGCUAUCUU  
>piR\_pseudo\_19549  
CCCAGGUGGCGUAGGCGAGUGGGUGGUUCG  
>piR\_pseudo\_26147  
AUCCGACCUUUCGGUAUUAGCGAUUUCAC  
>piR\_pseudo\_12941  
AGAGGAUUCAUGCUGAUUGACCUCGCUGUA  
>piR\_pseudo\_24520  
AGAAUACAGUCAAUCUCAUCCAUGGACA  
>piR\_pseudo\_2743  
UUAUUGAGAAAAAAUUGCAGAUAAAAGAA  
>piR\_pseudo\_3053  
AGUAUUGAUUCUCCAACAGUGAAUCUUUUG  
>piR\_pseudo\_4875  
CCCCCUCAGUUGACUAAGGCAAUACGUCC  
>piR\_pseudo\_22213  
UUGUUGACUUACAUGGAAAUAUUUGCAAU  
>piR\_pseudo\_12044  
UUGCUAUGUCCUAUUAGAUCGCGGCCGGC  
>piR\_pseudo\_2814  
GAGAAUGGCACUAUUCGAAUCCUAAUGACU  
>piR\_pseudo\_3650  
UUAUUUGAUUGUAAUAAGUUAUUUUGAAGC  
>piR\_pseudo\_11480  
ACUGGUAUCGCAGUGAAAGCCAAUACUCG  
>piR\_pseudo\_23658  
GGACAUCGUCUCCCUGGAUGGUUCCAAAA  
>piR\_pseudo\_21197

AGGUACAAAUUAUGCGCUAUCUGAAGAAGU  
>piR\_pseudo\_26061  
AGGCGUUUUCAUACGGCUUUUUAAGGACAA  
>piR\_pseudo\_7017  
AAAAAAGUAGUUAUAACUAAAUCCUCGCUG  
>piR\_pseudo\_5114  
GGCUUACUUGACACCUCCUUAUUUAUUGUGA  
>piR\_pseudo\_7574  
UGGGGGCUCAUAAAGCGCGGCCAGAACUUA  
>piR\_pseudo\_12540  
AAACAUCCUCAGGAUUUAUGGUUUGUCCGAC  
>piR\_pseudo\_20438  
UAAGGUUUUACAUAAGGUGUGUAUGCCGU  
>piR\_pseudo\_13904  
ACUAUUACAUAACGAUAACUUGUUCGCGUG  
>piR\_pseudo\_9705  
CUUUUUUGUCGGACACAUGGGUCACACUCC  
>piR\_pseudo\_6013  
CACUCACCCUCGUGUUGGUCGGAUAUCCGG  
>piR\_pseudo\_13836  
GAAGCUAGAGAGUAGAUGUAGUUGCACCCG  
>piR\_pseudo\_18928  
CUUGCUAUCGUGUUGUGCACAUGCUCGGUG  
>piR\_pseudo\_11152  
UACGCAAACAGGCCACGGUACUAAGUGU  
>piR\_pseudo\_518  
AAUUAGUCUCUCGUGAAUGAGGGGAAAAGA  
>piR\_pseudo\_17581  
CUCACUCUCGGGUAUGCAGAAAUGGUAGCC  
>piR\_pseudo\_13959  
GCGGUCCUAGUUAGCUGCACGCCAGCAG  
>piR\_pseudo\_20106  
AGGCUUCCAAAUCUGAGUAAGUGUUAAGCC  
>piR\_pseudo\_12082  
GUGCGAUUCCAGUCUACCGGCGGAAGACA  
>piR\_pseudo\_12047  
CAAAAUGGGCUUGAGUUAGAGGUUAUACCU  
>piR\_pseudo\_768  
CUCCCUCGGAGAUAGGAGCGAACGCCUGU  
>piR\_pseudo\_8400  
CAAGAGCCGGCGGCUGCACUCACUCGUGCG  
>piR\_pseudo\_13293  
AAAGUAAUAAUGUUAUGUUGUACGGCGAU  
>piR\_pseudo\_1475

UAAACUACGGUUGCAUAUCCCCUACAUCU  
>piR\_pseudo\_20488  
UACGUCAGCGUUUCAGGUUUUCGUAAAACC  
>piR\_pseudo\_2922  
UACCUCAGUGGCCUCGCCCCGCCUGACC  
>piR\_pseudo\_5399  
UAUUAACGGGCGCAGAGUAUAGUUGACCCU  
>piR\_pseudo\_14092  
ACACGAUGAGGGUUACUCAAUACAUUCGAU  
>piR\_pseudo\_12032  
ACCUUGCUCUUUCUCUACAGUGCCAUC  
>piR\_pseudo\_1912  
CAGCGGGAAUCUUUUGCGGUAGUCUGGUGG  
>piR\_pseudo\_7660  
GAGUGGUCAGUAGGGCAUCACGAGAUGUUU  
>piR\_pseudo\_11178  
CUCGGUAUCCACGUGAGCUUCUUUCGUCGU  
>piR\_pseudo\_17046  
CAGCACGGCUCAUUGCCCAAGAGCGUGGAA  
>piR\_pseudo\_2965  
ACAAAGAUGAAUCAUGAGGGCAUACUUUCC  
>piR\_pseudo\_27019  
UGUGCCGGCGGCUCGCGGUGGCCGAGGUCA  
>piR\_pseudo\_3798  
GUUUAAGGAAGUGGCCUUUCGAAUUUUUAUA  
>piR\_pseudo\_1787  
UACCCACGUGGCUUGACGAUAAUAAUAUU  
>piR\_pseudo\_20949  
GAGCGCUGAUAGCUUAUAGCCUCAGUAGCC  
>piR\_pseudo\_3370  
GUGUAUGUGGACCUCGACUCGCGUUGUCA  
>piR\_pseudo\_14990  
GGUUGGGGUGCGGGGCCUUAGGGCCGCG  
>piR\_pseudo\_10303  
CCGCAAUUAACAGUGCGGCAGGUUUGCUG  
>piR\_pseudo\_22771  
CUUUCGGCGAUUGCCGAUAAUUCUUCAGU  
>piR\_pseudo\_5028  
AUGUUGUUAUGCACGCUACAUCAAGGGCAG  
>piR\_pseudo\_7758  
AAACGAUAGCAUCUUGAUCAUCCCUUUUA  
>piR\_pseudo\_26211  
ACGGCUAACUUCGUCUACACUAACUACGUA  
>piR\_pseudo\_14172

GUGCGCCCGCGGCCCGGAACCUUACAAUCC  
>piR\_pseudo\_8382  
AGACUGAUCGAGUCGAUGUUUAACGCAAGG  
>piR\_pseudo\_8982  
CAAUGGUGGAUGUCUAUAGAACCCUGAACU  
>piR\_pseudo\_13498  
AAGUUCUGUAUAGAAGGGUUAUCCGGUAAU  
>piR\_pseudo\_21000  
UCAUUCGGAACUUUUCGGUAAUGGGUAUCA  
>piR\_pseudo\_9856  
GUCUGAACGCACAUGCAGUUAACAGACGU  
>piR\_pseudo\_13905  
CACAGCCAUCCCGUGCGGUCGCGGUGCAGA  
>piR\_pseudo\_18916  
GGUGGAUUAAGUUUUUUUGAAUGAUAGAUG  
>piR\_pseudo\_19150  
GAAGCCAUGGGUUUCGGAUUCGUCGUUUUU  
>piR\_pseudo\_11292  
AUGCACACACCUGUUGUUUCCCCUACGCC  
>piR\_pseudo\_6844  
CAUAACUUUGAACAUUCGAGGGACCCACU  
>piR\_pseudo\_26238  
AUGCGAAGAGCCUUCUAUCCGCCUCGAGAG  
>piR\_pseudo\_20535  
AUUACCGAGAUCUUCGUGAGGUAACUGCG  
>piR\_pseudo\_12414  
GGGUGUUUCGGCAUUAUAGGACCUAGCCAC  
>piR\_pseudo\_522  
AAAGAGAAGCUCGUGUAAGCAUCCACCUAU  
>piR\_pseudo\_14679  
UAAGUGUAUCACUCGCAUACGUAAUCCAAC  
>piR\_pseudo\_16681  
GAGCCGUUUGGUCGCUAUUUAAAGGGACCGG  
>piR\_pseudo\_26635  
AUCCGGCCCGAUUUUUCUCUCGUACAUUCU  
>piR\_pseudo\_6537  
CGCUCUGUUGUUCACGUAAGUUUAUCCUG  
>piR\_pseudo\_11768  
AUCAACGAGUGCUGCCCUUGUGGGACUGCG  
>piR\_pseudo\_23287  
AGUACUUUUAUCCUGGGAUUACCAGACACG  
>piR\_pseudo\_2111  
GGCCGUUGAGCUUUUAUCAUCGCGUGUCGA  
>piR\_pseudo\_745



UUUUACUAGUAGACAAUCAUCACAAUUAGC  
>piR\_pseudo\_14499  
GUUGUCAUUUCGUGUGCUAAUGCAGAAUGGC  
>piR\_pseudo\_25233  
UAGAACUAGAUUAAAGGAAAUAUCCAAAUA  
>piR\_pseudo\_24469  
GUUAAAAGAACUUUUUAAAUUAAUACGUGU  
>piR\_pseudo\_9486  
CUACAGCAAUCCGGAACAGUGGUAAUAAUUA  
>piR\_pseudo\_7513  
ACUGGGGAUCCCCCGCGACACCGGACCCGC  
>piR\_pseudo\_21290  
GUGCUGGCGGUGCGGGCAUCCUAGGGCGAU  
>piR\_pseudo\_25905  
AACCGUUACACGUUACUACAGUAGACCUUAA  
>piR\_pseudo\_25419  
GCUAAUCAUGAUCUGGUAAGUGAAUGAUAA  
>piR\_pseudo\_1342  
UUGAUGGGUGCCUAGCGGGGAAGCAGUAAAC  
>piR\_pseudo\_14397  
UUUUAGGACAUGGCCGGAUUUAUGAACGGAA  
>piR\_pseudo\_4914  
AUGAAAGACCAAUAUAAAGUUGAGCCAAUA  
>piR\_pseudo\_14725  
CGGGGCCCAGGUUAUGGCACGUGCCUGUUUA  
>piR\_pseudo\_26199  
GCUGGAGGGAGCAUGGCCGGAAGGAGUCGUC  
>piR\_pseudo\_21449  
UUACAGAAUAUGAAGGUACGAGUUCAGUAAG  
>piR\_pseudo\_12988  
UUUUCAUUUCGUAAGAAAUUAUUUAAAAUUG  
>piR\_pseudo\_22731  
CCUAGAGCAGGCGGCGGACAGCCACGAGCC  
>piR\_pseudo\_1432  
UUUCAAGAUUAUGGCAAAAUAUCUCCUACA  
>piR\_pseudo\_21212  
AUAGCCAACAUCACAGCGUAUGAGUCAUUUA  
>piR\_pseudo\_8834  
UUCGUAAAACGUCUUUUUAAUGGUGGGCGU  
>piR\_pseudo\_9835  
CUUUUUUAAAGGCCCAAAGUUUAUCAUCGGA  
>piR\_pseudo\_18289  
UUUACUUGCGGGCGUGUAAGAACACUGCUUG  
>piR\_pseudo\_4632

ACGGGUAGUCACGCCGUAUAAACUGGUUUUC  
>piR\_pseudo\_23221  
UUAGCGACUAUCAGGUGGCUUAGCGAAGCGA  
>piR\_pseudo\_21549  
CAUAGACGAGGUUUUCGAUUUAUUUGACGAA  
>piR\_pseudo\_14094  
AGCCAAUAAUUAAGCUCAAAGUAACUCUUGAC  
>piR\_pseudo\_7213  
CAAUGCACGAUCUUUCGCUACUUUGCCCCC  
>piR\_pseudo\_16195  
UAUAUGUGCUGCCAAGUCGAUUGAAUUGCUU  
>piR\_pseudo\_22938  
CCUGGGCCAGCCUUUGUUGGAUUGUGGCGG  
>piR\_pseudo\_11364  
CGCAUCAGUACUUACUUCGCGACUACAGUAA  
>piR\_pseudo\_26579  
UAUCUUAAGCGUAACUCUUCUUGGAAGAUAC  
>piR\_pseudo\_1081  
UAGCCCGCACCUGAAUCCCGUUGCCAUGCGG  
>piR\_pseudo\_22181  
CGCAUUACACUCUUACGCGAGGCGCGCACA  
>piR\_pseudo\_3563  
UUGGAAUAAGGUGUUUAUGCGGCUUCAAUUG  
>piR\_pseudo\_22044  
UCGGAAUGAACAGCCCUCCUAGUGAGUAGCU  
>piR\_pseudo\_10173  
UUAGACCGCAUCUUUUUUGUUUACAAUUCUG  
>piR\_pseudo\_8354  
UGUAACUCCAUUGGAUAACCCCGCAGGAUUA  
>piR\_pseudo\_17685  
UCCAUGAAGUACCGCGAGCAUUAUUUGGU  
>piR\_pseudo\_25696  
GUUCAGAACAGGAGUAAGCCCCUCGGGCGUG  
>piR\_pseudo\_16826  
AUUAUACAAUAUUGGCCGUCGGACUCUUCAU  
>piR\_pseudo\_22498  
AAAGAGGCGAUUUUAGCCGUCGGUUAUUG  
>piR\_pseudo\_6908  
CCGACAUGGGUGGCUUGACUUUCUGGGGAGC  
>piR\_pseudo\_19625  
CGGAGUAUUGUUUAGCCGUAACUACUAACGU  
>piR\_pseudo\_1248  
GGUCGUCCAUCAGCAUGUACGUUUCUAGCAC  
>piR\_pseudo\_25700

ACAGGACGAUGGAGCGGUUCUGUAUAAAAACA  
>piR\_pseudo\_6708  
AGUUACGUUGCGCAAUUUCUGAGAGGACCA  
>piR\_pseudo\_18058  
CCCUAGCGGAUCUGAUGAGUGUGGUUUUUUA  
>piR\_pseudo\_2884  
AACUAUAGUUUCUGUGUGGUUCCACGACAUG  
>piR\_pseudo\_2796  
UACGAACCGAUUAUAGAUCAUCAUAACCUUU  
>piR\_pseudo\_24767  
GGGCUUUGGUUGUACUAGUACCGAGGUUAUC  
>piR\_pseudo\_18931  
GUCAAUCGUAAGCUGCGAUGUUUGAAUCUGA  
>piR\_pseudo\_26260  
UUUCUAAUGUCACUAGGUAAAUAUAAUAUGC  
>piR\_pseudo\_24160  
AGUUUGUAUAGUAGAAAAAGAGAAAAAAAU  
>piR\_pseudo\_16482  
UGCCAUGCCGCAUAGCCAAUCGGGGGCUGGA  
>piR\_pseudo\_15199  
AAGCCUGGUGGUACACCAAUCCACUCCA  
>piR\_pseudo\_14974  
UGGUCUUCGAGUCCGCCUCAACGAUUGAUA  
>piR\_pseudo\_17440  
UUAUAGGACCACUUCUUAAGUAGGGGGUUUC  
>piR\_pseudo\_23014  
UGUAAUGUAAGAAAUUAUAAUAAAUAUAGA  
>piR\_pseudo\_14306  
CGAACCGGGUAGGCCCUUAGGGUCACACUCG  
>piR\_pseudo\_7280  
ACGGCUAGGGACUUGCCACACUGUAUCUCUG  
>piR\_pseudo\_19707  
AGCACAUAGUACAUGGUCAAAUUCCAUAUC  
>piR\_pseudo\_8883  
AGACGUGUAAGACAGCGUACUUGAGUAUUUAU  
>piR\_pseudo\_25790  
UUGAACCUACGUAGCUUUACACCUUUUGAGU  
>piR\_pseudo\_3485  
GCUUUUCACACUCCUGGUGGCCAGAAAGUC  
>piR\_pseudo\_21652  
UCCGAGGAUACUCGUUAGUGUAAGCUGAAAU  
>piR\_pseudo\_21230  
GACAUUUUAUAUACUUGCUGCGCGGAAAGUG  
>piR\_pseudo\_22147

CGCGGCGUUAGCUAGUAUUCUUGGACAGUCA  
>piR\_pseudo\_22665  
GGCCCCGCGGGCGGCUCGAGGCCGUCGACGU  
>piR\_pseudo\_24406  
UUCGCGCCUAUUCUUCUGUGUACUACCGUAG  
>piR\_pseudo\_25184  
CGAUACGUGUCUUCGUGGAUCUAGCGCAGUC  
>piR\_pseudo\_8765  
AAUUUCUAGACCCCUCCGUUAGCUGGAAUGG  
>piR\_pseudo\_25926  
UCUCAUUUCUAGUAUAUUGUAUGAACCAUGG  
>piR\_pseudo\_25555  
CGUCUGUAAUGCUGUGGAUAUGUGGAUCUAA  
>piR\_pseudo\_23339  
CCUCUAAAUGACAAUGUUCGUCGGUACGGAG  
>piR\_pseudo\_25721  
ACUCGCAGUUUCCGGGUGUUCUCAUUAGAA  
>piR\_pseudo\_2619  
CAACAGCUAGUAAUUGGGCAGCGAGAAGGCC  
>piR\_pseudo\_6061  
UGGGGGUUAUUGAGAACGUCAUCGGCGACUG  
>piR\_pseudo\_19767  
ACGCGUCCACUUGCCCGUGUAGCUGGCCGAA  
>piR\_pseudo\_25372  
CAUCGAUGCCGAGUCGGGUUUACACGUUGU  
>piR\_pseudo\_18339  
CGGUAAUCUAGGGGCCCGACGUCCUGGCUUC  
>piR\_pseudo\_2895  
AGGAUGUGUAUGCUGAAUAUAAGUGGAGAAU  
>piR\_pseudo\_26036  
ACGCGAACUCACAUGCUGUUGUUGCAAGGAU  
>piR\_pseudo\_24164  
GUGAUUGCAAGAGAUGAAAUAUUGUUUCGG  
>piR\_pseudo\_5669  
UAGCACUGGAUCUCAAUCGCUGUAAAGCCCA  
>piR\_pseudo\_2264  
CUUGUUACCUGCGCGCUUCGUAGGCCGGUGU  
>piR\_pseudo\_26779  
AAUGGCCUUGUAAGGGUAAUCCAACGUUA  
>piR\_pseudo\_6097  
UCGAUUCGCGAAUGAAUAUUGAAAUGUGUU  
>piR\_pseudo\_8538  
AUAUUGCCGGCUUUGGGUUGGACCCACUAG  
>piR\_pseudo\_5554

CGCUUGACCCUAAUGUAGAAGACUGGUGGAA  
>piR\_pseudo\_19227  
UAGGGAGAGGCCUUGUGGGGGUUAUAGUGU  
>piR\_pseudo\_15991  
AAUUAAGACAACUAAAUAAGGCAAAUUGCCU  
>piR\_pseudo\_11818  
CCCUCAAAGUCCAACGCUGUAUUUGUUUGC  
>piR\_pseudo\_16440  
UGAUAAAUAUAACCCGCUAUUACCAGGUUA  
>piR\_pseudo\_22994  
GUCCUCACGAUCGUCUGGGGAGGUGCCGUA  
>piR\_pseudo\_18142  
CUUUUGUUUGAGUUCAUACCACUUCUGUCA  
>piR\_pseudo\_8099  
UAUGGGCUUCCGAGUAAUUUGGGCUUUGUU  
>piR\_pseudo\_2755  
GUACACCGUACAAUUUAGGAAAAUAAAAGU  
>piR\_pseudo\_22288  
UCCCCCGUGGAUGACGUAAAGACAUUGUCC  
>piR\_pseudo\_13837  
UGCGUACAUUGGAUGGAUACCUUACAAUGCG  
>piR\_pseudo\_13335  
UCUAUAUUGAAACGGGAUAUAACAGUACCUA  
>piR\_pseudo\_19205  
CCGUUUGCAGAUUCGAUAGAUUUGCGUACCA  
>piR\_pseudo\_6264  
UGGCACAGUGCGAGUCGGGCGCAUGGGAAGU  
>piR\_pseudo\_22566  
UGAUUUAGCAUCCAGAAUGGACCGGUGGA  
>piR\_pseudo\_22650  
AAGGGUUUGAGGGCAACCGUGAUCCCAUCGC  
>piR\_pseudo\_23245  
UUCUGUACGACAGGCACGUUUUAGUUCUACG  
>piR\_pseudo\_13700  
CAAGUCCGUGUUGGCGGCGUCUCGGCUUUGA  
>piR\_pseudo\_12008  
ACAAGGAUGCACUGCCUACACGCGGGAUCCC  
>piR\_pseudo\_16278  
CCUUUUUGACUUGACGGUUCUACUGUAUUG  
>piR\_pseudo\_2481  
UCCACACGUUUUAUAUCGAUUGGUGGCCCC  
>piR\_pseudo\_20210  
UCUCCUGGCUCGGACUCGCGUUACGACUCCU  
>piR\_pseudo\_2801

AUGGCGGGAGGCUAUCAGCCGGCUGUUUCG  
>piR\_pseudo\_13537  
CAAUUUGCGGCAGUUAUGGUGAACGGAGGAC  
>piR\_pseudo\_24225  
UACGCGGGGAUUUAAACAAAACAUUGUCGCG  
>piR\_pseudo\_23954  
AUAUCUUUCUAAUUAUCUGCGUACUAAUCC  
>piR\_pseudo\_1212  
UCUUGUUCGCUGCAAUUAUGCAUUUCCAA  
>piR\_pseudo\_16307  
ACGUGUGUCCUAAUUGUUUGUGAGAGACCU  
>piR\_pseudo\_13671  
CGUCCUGUUCAAGCACCCUGGCUUCGGGGGC  
>piR\_pseudo\_7164  
UGGCAAUAUCCAGAGGUCCCUAGUAUAGUA  
>piR\_pseudo\_20916  
CUGAUUUACUACCUUUUGUGGCUAGCUAGCU  
>piR\_pseudo\_16171  
UGGGGCAGUAAAGUAUUUGUGCAAGAUCGG  
>piR\_pseudo\_5738  
ACCCGCGUUGCAAUACGGAAGGGCUUUCGCU  
>piR\_pseudo\_22744  
GGCCAACCGUGCUUACGGGCCGAUCCUCUG  
>piR\_pseudo\_23945  
CUUAUAUUUUGAUUACUCAUAAAUAUUGAU  
>piR\_pseudo\_23683  
GUAUUCUAACCCUCUAAUGGUAGGAUUUACU  
>piR\_pseudo\_22069  
GACGGUGCGCCAUGGAUACAUCGGGCACACC  
>piR\_pseudo\_25203  
GGCGAACGGGACCCCGCGGCGGGCGACCCG  
>piR\_pseudo\_20757  
GCAAGCUUCGGAAUGGCUGCUUUAGCAGGAG  
>piR\_pseudo\_15745  
AAGCCCAACGCUCGAGCAUUGGCCUGGUAU  
>piR\_pseudo\_24253  
UGAUGUUCUGUUCGGUUUAAGGGCCGCAUUA  
>piR\_pseudo\_3510  
ACCCUAGUAUGACAACAGCAGUUGAAUACUU  
>piR\_pseudo\_6971  
UAGUUACGUUCUCUAGCUAUACGCGCAUUGG  
>piR\_pseudo\_15993  
UAAGAAUCUACUGAAGUCGCAUGACGCAUGG  
>piR\_pseudo\_1656

ACACAGUAGGGUGCAGUGGUAGAGCUGAUAU  
>piR\_pseudo\_6113  
UCUACUAUCAUGAACACAAAUCAUAUUCAUU  
>piR\_pseudo\_8925  
AGUAGUUAGGUCGAGAUUGUACCGCUGGAUU  
>piR\_pseudo\_1799  
CGAGUGUUGCUAUAUCAAGUUGUAAAGAGGA  
>piR\_pseudo\_26258  
AGGCUAUUGACACCAUAGAUCGAAUGUUUAC  
>piR\_pseudo\_6824  
UUACCGUUUAGGUAAUACAGACCGUUUUCAA  
>piR\_pseudo\_14905  
CGCUUUACCAUAGUACCUUGGGAUGCCGGUA  
>piR\_pseudo\_989  
ACGGCCAUACAUCGGUAACCUCCAUUCAGGU  
>piR\_pseudo\_19808  
AAUAACUGCCUCGGCCCCAAAGGAUUUAAA  
>piR\_pseudo\_2377  
CAGUAAAUGUAGACAGUCGAGCAGUGAUCCG  
>piR\_pseudo\_25198  
GUAAGUAACAUGAAAAGGCCAAUCCUAUCU  
>piR\_pseudo\_23760  
ACUAGCGAAGAGUAGGACGCUUUGGACGCCU  
>piR\_pseudo\_26728  
AGGAUGUGUCACACUAUGUGCUAGGGAAUUA  
>piR\_pseudo\_22399  
GUAGUCGUGUCGAAGGCUAUGUAUUUAUACU  
>piR\_pseudo\_13117  
UUCGUGUGACACGGUCGUAGUCGGAGAGUAU  
>piR\_pseudo\_22120  
CGGCGUACUAAGUGUGUUCUGACGUUUUUGA  
>piR\_pseudo\_5533  
GUGUAUAUUGGACUUGGUCCAUGAAGAAUAC  
>piR\_pseudo\_23218  
GCAAGGACUUUAAUACAAAUGCCUUUUACAU  
>piR\_pseudo\_25971  
AUCGACGUGUUAAUUGGCGGUUUUGGCGU  
>piR\_pseudo\_17733  
AAUCUAGAGUGUCCGCAGAGUAUAAAACAAU  
>piR\_pseudo\_12886  
GUACGAAUCUGUAUGCUGAGCUUAGUAGCUA  
>piR\_pseudo\_20616  
CGUUGACGUCUUGUAUACUAUAACGAGGGUU  
>piR\_pseudo\_7335

AAGUUGAGAGAGUUUCGGUGAACUAUAUUUA  
>piR\_pseudo\_16878  
UAAUUUCGACUAGAAACGUGUGUUUCUUAGA  
>piR\_pseudo\_6376  
UCUUUCCCGUCUGUGACAUUUGUUGGUUUAC  
>piR\_pseudo\_25272  
UUGGAGGUUGACAUUACAGAGGUAUCAACUA  
>piR\_pseudo\_19327  
UAGUAGGGCGAUUAUAAAGCCACUAUCUUUU  
>piR\_pseudo\_14411  
GCAAUUCUGAGUAGCUUAAAGAGACCCGUUA  
>piR\_pseudo\_24427  
AAAGACCGGAAGAGUCCACAUGUCCUAAAC  
>piR\_pseudo\_21188  
GGCCUGCGUCGCCUAGCCGCCUCGCCCCCCC  
>piR\_pseudo\_10198  
UGAAUAGCAGCAAGCGGAGAGCUGAAAUGA  
>piR\_pseudo\_2470  
CUUAUUGUCCACGUUUUGCUAAUGCCAUG  
>piR\_pseudo\_11239  
GUGGCCAAUAAAGUGAUGUCAUCUAACGAUG  
>piR\_pseudo\_12569  
GAACUGGCUGGACUGUCCACAAACGCUGCA  
>piR\_pseudo\_17577  
AAUAGGAGGCGAUAAAUACGCUCUCUUUGUG  
>piR\_pseudo\_79  
GGUAAUGGCGUUAGUGACUGCAGCGGUGCU  
>piR\_pseudo\_17947  
UUACUUGAAUAACGUUUACGCCAAUGAGUAG  
>piR\_pseudo\_23321  
GUUGAUCACCACGUGACGUAUGUCCGCGGA  
>piR\_pseudo\_10138  
AGGGCAUACCACUCCUUUGGAUGAUGGUGA  
>piR\_pseudo\_12489  
GUGGGCAGCGUGUGCGUGUAAAUAUUUGGU  
>piR\_pseudo\_16838  
CUCCAGUGGACUUAGGUACGGUGGCCAUACU  
>piR\_pseudo\_20457  
GGUACAUUACCUUGCUUCGUUCAUGGGAAUG  
>piR\_pseudo\_108  
CAAGUUUAUCUGGCGGGUCUGAGUGAUUUU  
>piR\_pseudo\_2487  
CUUGUAAUCCUUGUUUGUCCAUGCAAACUAA  
>piR\_pseudo\_17732



AUAAUUGGUUAAUUCAUGCUCGUAGCGAUCC  
>piR\_pseudo\_13175  
AGACAAUAUAAAUAAGUUUUUAUUCUUUA  
>piR\_pseudo\_3813  
AUUAUUCUACACGAGGGUUCAGGGGAUUUC  
>piR\_pseudo\_12561  
CGAGAGAAACAAUUCGGAAGUGUCAUAUAU  
>piR\_pseudo\_11850  
AGUUCUAGCGCGUCACAAUAUGAUAAACCA  
>piR\_pseudo\_26269  
AUGUGCCCGUAUCUAAACUAGCGUAACUCGU  
>piR\_pseudo\_14724  
CCGGGCGGAACCAGGUAAUUAUUGGACCCC  
>piR\_pseudo\_15802  
UGCGGCAGUUUCCCCGAUUAAGCAAUUC  
>piR\_pseudo\_15764  
AGGAGCUUCCUCAGGGACGCCGUCAGGUUCG  
>piR\_pseudo\_3551  
CAGGAAACAGAUUUGUUGUAAUCUUAAGCC  
>piR\_pseudo\_26009  
AUACGGUCAUUUGUACAUUACCGGGUUGGUA  
>piR\_pseudo\_21624  
GCCUAUAGGACACAAUCCUCGCCAGGUGCAU  
>piR\_pseudo\_26538  
AAUGUACGCCCUUUCUAGAAUAAGUUCAUGA  
>piR\_pseudo\_5917  
ACAGUCCGUUCCCGUUACGAAUAACUGGUU  
>piR\_pseudo\_366  
CUUACUGAUUACCCUAUAUCUCUUAACUGUA  
>piR\_pseudo\_26538  
GUACUCCAAUUGGUCGUUUAUUGUACAAUAC  
>piR\_pseudo\_24184  
GGGUCUCCAAUUGUAGUUGUGUUUCACGAUU  
>piR\_pseudo\_24541  
AGACGUAAACGGCAGGCGAGCGUUACGCAUA  
>piR\_pseudo\_24057  
ACAAUAUAGGGACGGUAUAUAGCAGUGGACG  
>piR\_pseudo\_23649  
AGCAUGCUCACGAGGACGCCUGAUUAAUAA  
>piR\_pseudo\_19281  
CUGACAGAGGACCUCGCCGUACAUUACGGA  
>piR\_pseudo\_22222  
GCUUGACUUGAGGGUCCACCUGGUCAUGGCU  
>piR\_pseudo\_18927

AGUUUAGAAGGACAUAAAAACUAAUUCAAC  
>piR\_pseudo\_26342  
CGGUCUCACGGCGUUUAUUUUGGCAUUUCUA  
>piR\_pseudo\_11776  
CGGAUCACAAGCAGCCCGGGCUGACGAAUGA  
>piR\_pseudo\_8987  
CCGGUAUAGAUGACGAAACCCUACCGGUGGG  
>piR\_pseudo\_26054  
UGGAAUUAUCCUUGAUUCCGCGAGCAGAAC  
>piR\_pseudo\_21799  
AAUCUACACUAGCAUGACGGGUCUCUGUACA  
>piR\_pseudo\_18283  
CUUUCGUAAGGAGGUUGUGUUUUAGAGGC  
>piR\_pseudo\_3249  
GACUUUAUCUGAUCGAAAAGUGGAAAUCGA  
>piR\_pseudo\_6812  
CGUCCGGGUUUGGUGUUGAAAUACGCAAGCC  
>piR\_pseudo\_12547  
GACGGGAACUCGGUGUAGGAGAAAGCGCUGG  
>piR\_pseudo\_1420  
CAAUAGAGUUGCACCGCAAUGGAAAGUGUAC  
>piR\_pseudo\_8483  
CUACGUUUAACUCUGUGCUGUCUUUAUUUGG  
>piR\_pseudo\_16175  
CAGUCUUAAGUGCGACUAAAGGACUGGCCAG  
>piR\_pseudo\_3945  
AAAACCGAUUGGAUUCUUGAUGUGUUCUAUG  
>piR\_pseudo\_20938  
UCGCGUGGAGCGUUAGCUAAUCCAAAUGUUG  
>piR\_pseudo\_25545  
AAGCCCCUCCACCCCGCCUGGGCGGAGUAG  
>piR\_pseudo\_12035  
GGAUCCAACCAUUGAUUGUGGUAUAAUCGCAU  
>piR\_pseudo\_15101  
AGGCGCCGAAUCACGGAGCUCUCUUGGAUUC  
>piR\_pseudo\_11310  
AAAUCUAUUCUCGCAGUUAUCUAGAAAUAGG  
>piR\_pseudo\_12857  
UUCUGCUGUACGGGGAGUAUCCGCACCCCGU  
>piR\_pseudo\_14095  
ACUAAUGCCUUUGAAUAUCAAUUAGAAUUAU  
>piR\_pseudo\_24725  
UCAUUUGUCGUUAGCCUAGGGGUGGCCGGC  
>piR\_pseudo\_25471

AAGUGUCAGACCCUGGUGAUACGCAUUAGGU  
>piR\_pseudo\_8593  
GAAAUUUUAUUCAUGUUGGCUAUUUGGAAAUC  
>piR\_pseudo\_1831  
GUACAGAGGUCCUACAAUUGGACAUCGGAG  
>piR\_pseudo\_23587  
UACUACGUUAGAAUAAAUAGUGACAUUAAC  
>piR\_pseudo\_3659  
UUGAAUGUGUUUAUGGUUUUUUGUAUUCUUA  
>piR\_pseudo\_8555  
UAGUAUAGUAUUGAGGUGUAGCCAGCGUACC  
>piR\_pseudo\_7806  
GACGUCGUCCGGAGUUAGACCAGCGCCCCCU  
>piR\_pseudo\_3684  
UUGGAAUUGAGAUUAACAACAUUGAAGAAAU  
>piR\_pseudo\_26638  
GAUUGAUAACUUAUAUGAUGUUUCGCUGUAC  
>piR\_pseudo\_12864  
CGUUGCCGUUCAACGUGUAGUACGAAUAUC  
>piR\_pseudo\_7653  
UAACUGGUAGGAAAUGGUUAUUCAUGGGCAA  
>piR\_pseudo\_8780  
GUGGCGUUCACGGAGAUUUGUGUAUUACAGA  
>piR\_pseudo\_17241  
CCAUAUCUGCAGGCUGACGAUAGGGGAGUA  
>piR\_pseudo\_18754  
GGUGGGCGUGUCUCUGCCCGGAGUCUCACC  
>piR\_pseudo\_23115  
GGCAUCUAAACGAUAGAAAGUAUCGCCCCAU  
>piR\_pseudo\_22101  
UGCAAUGACAUUAGCGUACAUUAGGUGUGAAU  
>piR\_pseudo\_407  
UGGGCGUAUGACAGUAGUACGCGGGUACAGAA  
>piR\_pseudo\_2917  
GUGCGUUGCAUGCUUUUUUCUUUAUCAUCUAA  
>piR\_pseudo\_11002  
GCGUUCAGGCGGCUUGACGAGGCGGCCUCGGU  
>piR\_pseudo\_7021  
CGUGUCUAAACAUUGUCUGGAUCAGGGUUUAUUAU  
>piR\_pseudo\_19504  
CCCACCUCGAGUCAGGUGACAUUAAGCCAUG  
>piR\_pseudo\_6645  
UAGUUGCUAGGAUUUUAGAUUGGUAUUUCGUA  
>piR\_pseudo\_8376

UGAUGCGCCUCCGUUUUGUAUUUAAAAUUAGC  
>piR\_pseudo\_15933  
AUUAGGGGUGGAGGUUGCGAACAAAUUGUCGU  
>piR\_pseudo\_13703  
CAUUAGAAAGAUUGGAUAUUUUCGCGAAACGA  
>piR\_pseudo\_25705  
UAUAGGUCGAGUAGCGUUGAAUUUGCACUCAG  
>piR\_pseudo\_3838  
UAUAUCGAUUAACUAAUCCCCGGCUGUAGGU  
>piR\_pseudo\_24592  
UAUUCGUAGCCGCAGAUGUAACCGGUCAGAAA  
>piR\_pseudo\_19754  
GCGCCGCCCAUUCGGGGUGGGUCCCGGAAC  
>piR\_pseudo\_5802  
UGUGUUAAGUUAGCUGCUCCGAUUUAGUAGGA  
>piR\_pseudo\_5252  
UAAAGUUGCCCAUUGAUUCACGCGGAUCCUAC  
>piR\_pseudo\_17187  
UAGUUUAUGAUUAAAUCGUCAUGCUCACUAG  
>piR\_pseudo\_15425  
UCUCAAGGAGUUUGAAGACGCGUCUUGAGCGA  
>piR\_pseudo\_21107  
UUUAGUCGACUUGUCGAUCGACCGUAUCCGAA  
>piR\_pseudo\_21248  
AAGAAUGUAAGUGGGGAUUGUAGUCCUAGAUA  
>piR\_pseudo\_8084  
CUACUACUUUGUCUUUGGGUAGGAUCGGGCG  
>piR\_pseudo\_24597  
AAUUGUUUAAUUCUCUAUGGAUCAUUGUUUUAU  
>piR\_pseudo\_1329  
CAUCCAAAGUUACCUUGCUCUAAAGAUGUGCG  
>piR\_pseudo\_5116  
AGAAUCUCGUAAGCUAUGCAUGAGCAGAAUGG  
>piR\_pseudo\_5169  
GGGUUUGCUCACUACUGCGUGCAGGAUGUCAC  
>piR\_pseudo\_5251  
CCCGGAGGCCGAAGCCCUCGCAGGGGCCCCUG  
>piR\_pseudo\_25058  
AAAGGUGCAUGUUAUUAUGUCGUGGGGUUAU  
>piR\_pseudo\_18793  
GUGGGGCAUUGAUACUGGUUGCAUCGAGCUGC  
>piR\_pseudo\_14779  
AGAGGACUGCGAUUAUACAACUUCAUUGAAUG  
>piR\_pseudo\_4777

UACUGAGUAAAACACCUCUGGGACUGACAUA  
>piR\_pseudo\_9258  
GGUGAAAGGUCCUGUAGUUCUCUGCUCCCCG  
>piR\_pseudo\_16302  
UAGGUGUCCGUAAAUCUCUUACCGAUGUCUG  
>piR\_pseudo\_11946  
ACCCUAGCUGAGCCGGUACCCAGGGAUCCUC  
>piR\_pseudo\_17183  
ACCGUAAAGGUGAGUUGAUUCAUAAUCUAGC  
>piR\_pseudo\_1755  
GUCGCUCCAAAGUUUGUUGGGUUUGUGGGAG  
>piR\_pseudo\_12004  
CGAGCGGCCGAAGCGCAAAGCGCGAGGGGCG  
>piR\_pseudo\_23499  
AGUAAUUACCGGCUUAUGCAUGACGUUGCAC  
>piR\_pseudo\_11965  
UUAUUAGUGCGUAGUCCUCAUGUCCGAGUGCU  
>piR\_pseudo\_10047  
UGUGGAAGCAAGUCUUGCUAAGUUAUUUUUAU  
>piR\_pseudo\_2032  
UGUACCUGCGUAGCAUAAUUAUCUUAUAGCU  
>piR\_pseudo\_19222  
GCGCGAGGCUCGGAUUGCUGCUGGUAGAUCGA  
>piR\_pseudo\_4711  
UAUUGUAUCUUUGGGUAGACGCUAAGAUUAGA  
>piR\_pseudo\_21037  
AAUGGAUGAGUGCUUAAUGGACUAAUUCUGCU  
>piR\_pseudo\_14112  
GGUGAAUCUUGGGAUAAAGGUGAGCUAGCUAG  
>piR\_pseudo\_18164  
UCCAAUCCAUCCGUGGAUUGGGAUAGGCUCGC  
>piR\_pseudo\_11710  
UACCCAGCUGCCUACACUGCCUGUGAAAAAUG  
>piR\_pseudo\_18645  
GCAGCGUCCCCGGUUGAUUCGGACAGGCAUCG  
>piR\_pseudo\_19764  
AGCGUAAAUGAAGCCCGACGGUCACCAACGC  
>piR\_pseudo\_15864  
UCCCGCUAUCGUCGUAUCCAUGAAACUUAGGG  
>piR\_pseudo\_276  
AUCGAUCGUAUGGACGAAACGUAAUAAUAGA  
>piR\_pseudo\_13371  
UCCAAGCCACCUGACAGAUCUGUUCAUGAAA  
>piR\_pseudo\_23351

CUUUUACUACAAACAAUUGUUGUAUGUUCGAU  
>piR\_pseudo\_19711  
CUCAUCAUUGGUGUGACUUGCGGCUAUUCGGU  
>piR\_pseudo\_9064  
CUCCAUCGUUGGACGGGAAGCUUGAGGUAUAG  
>piR\_pseudo\_15001  
CCUGUGACCAGGCUAAGCCUGAGGAGCUUCUGA  
>piR\_pseudo\_11110  
UACCUCGCUCAAAAGCGCAGUGGGUAAGUGACCU  
>piR\_pseudo\_19206  
UACAUGAUCUUCUGCAUCGAAGGAUCCUUAGUAU  
>piR\_pseudo\_2883  
AAACAGAUUGAGGCGAGACCACAAAGACCCUGGC
